# Supplementary material for: Genome-wide chromatin interaction profiling reveals a vital role of super-enhancers and rearrangements in host enhancer contacts during BmNPV infection
Source: HighWire-hosted journal article supplement (doi:10.1101/gr.277931.123), 2023-10-23
Supplement: Supplemental_Code.pdf [file Supplemental_Code.pdf]

### **Supplemental Code. R script for normalization read counts to FPKM.**

# [readCount.txt] is the input file of read counts produced by featureCount, and [fpkm.csv] is the output file of FPKM

```
readCount = read.table('readCount.txt', header = T)

for (i in c(7:12)){

  readCount[,i] = readCount[,i] * 1000000 / sum(readCount[,i])

  readCount[,i] = readCount[,i] * 1000 / readCount$Length

}

fpkm = readCount[,-2:-6]

colnames(fpkm) = c('geneID', 'Control_1', 'Control_2', 'Control_3', 'NPV_1', 'NPV_2', 'NPV_3')

fpkm$Control = rowMeans(data.frame(fpkm$Control_1, fpkm$Control_2, fpkm$Control_3))

fpkm$NPV = rowMeans(data.frame(fpkm$NPV_1, fpkm$NPV_2, fpkm$NPV_3))

write.csv(fpkm, 'fpkm.csv', row.names = F)
```
