# Supplementary material for: Genome-wide chromatin interaction profiling reveals a vital role of super-enhancers and rearrangements in host enhancer contacts during BmNPV infection
Source: HighWire-hosted journal article supplement (doi:10.1101/gr.277931.123), 2023-10-23
Supplement: Supplemental_Fig_S1.pdf [file Supplemental_Fig_S1.pdf]

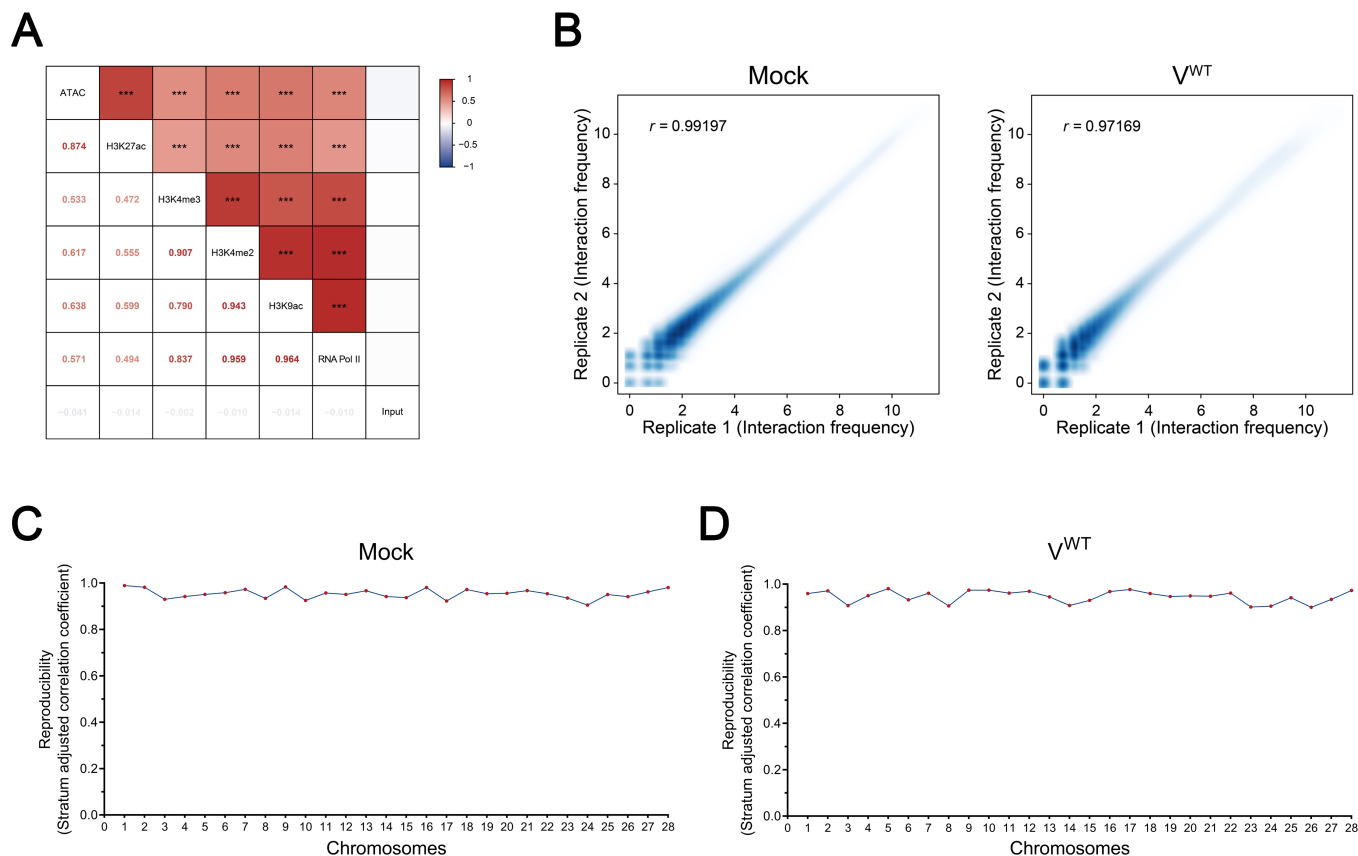

**Fig.S1 Correlation of the epigenetic features and the reproducibility of Hi-C assay.**

(A) Correlation of the chromatin accessibility and indicated histone modifications. The number represents the *Pearson* correlation coefficient. *Fisher* transformation; \*\*\* $P < 10^{-15}$ .

(B) Smoothed scatter plots showing the interaction frequency correlation coefficient between the two replicates of each group.  $r$  represents the *Pearson* correlation coefficient.

(C-D) Stratum-adjusted correlation interaction frequency coefficient between the two replicates of mock (C) or BmNPV (D) infected cells in each chromosome.
