# Supplementary material for: Genome-wide chromatin interaction profiling reveals a vital role of super-enhancers and rearrangements in host enhancer contacts during BmNPV infection
Source: HighWire-hosted journal article supplement (doi:10.1101/gr.277931.123), 2023-10-23
Supplement: Supplemental_Fig_S3.pdf [file Supplemental_Fig_S3.pdf]

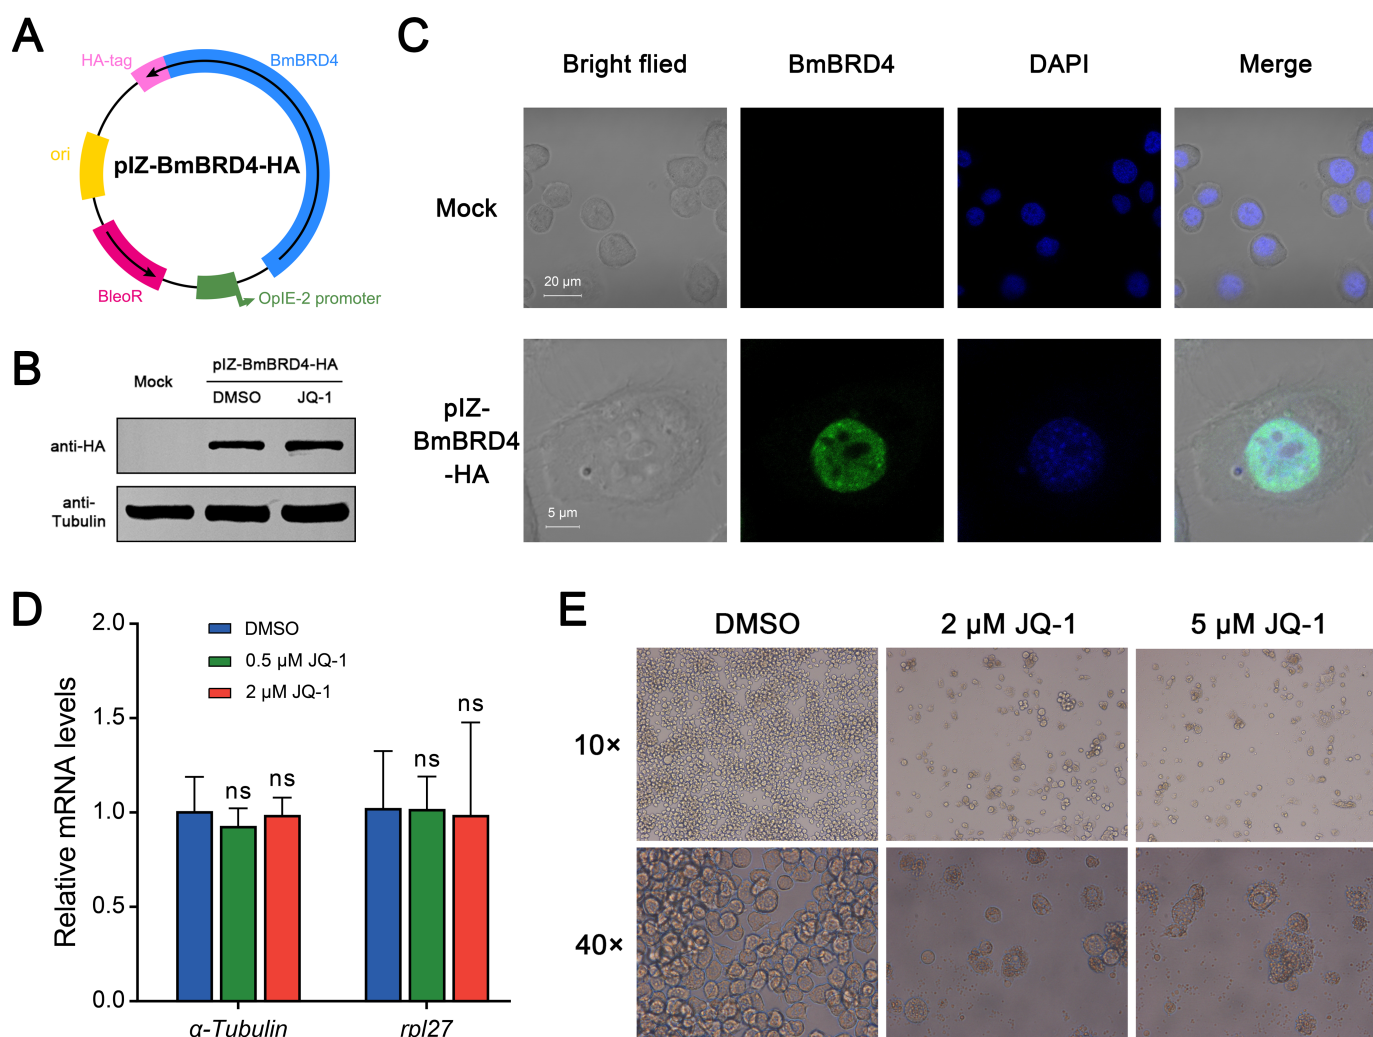

**Fig.S3 Function analysis of super-enhancers.**

(A) Schematic diagram of the vector pIZ-BmBRD4-HA used for transient expression of HA-tagged BmBRD4.

(B) Western blots showing transient expression of BmBRD4-HA in the cells prepared for ChIP-seq. Mock transfected cells were treated as the control.

(C) Localization of transient expressed BmBRD4-HA. Mock transfected cells were treated as the control.

(D) qRT-PCR analysis for the expression of two control genes that were associated with typical-enhancers in JQ-1 treated cells. *Rpl32* was used as the reference gene for data normalization. Three technical replicates for each of the three biological replicates per treatment were analyzed ( $n = 3$ ). DMSO treatment was served as the control. Error bar indicated the standard deviation. Two-tailed *t*-test; ns means no significance observed.

(E) Apoptosis degree of BmN cells after 48 h of JQ-1 treatment at different concentrations.
