# Supplementary material for: Genome-wide chromatin interaction profiling reveals a vital role of super-enhancers and rearrangements in host enhancer contacts during BmNPV infection
Source: HighWire-hosted journal article supplement (doi:10.1101/gr.277931.123), 2023-10-23
Supplement: Supplemental_Fig_S4.pdf [file Supplemental_Fig_S4.pdf]

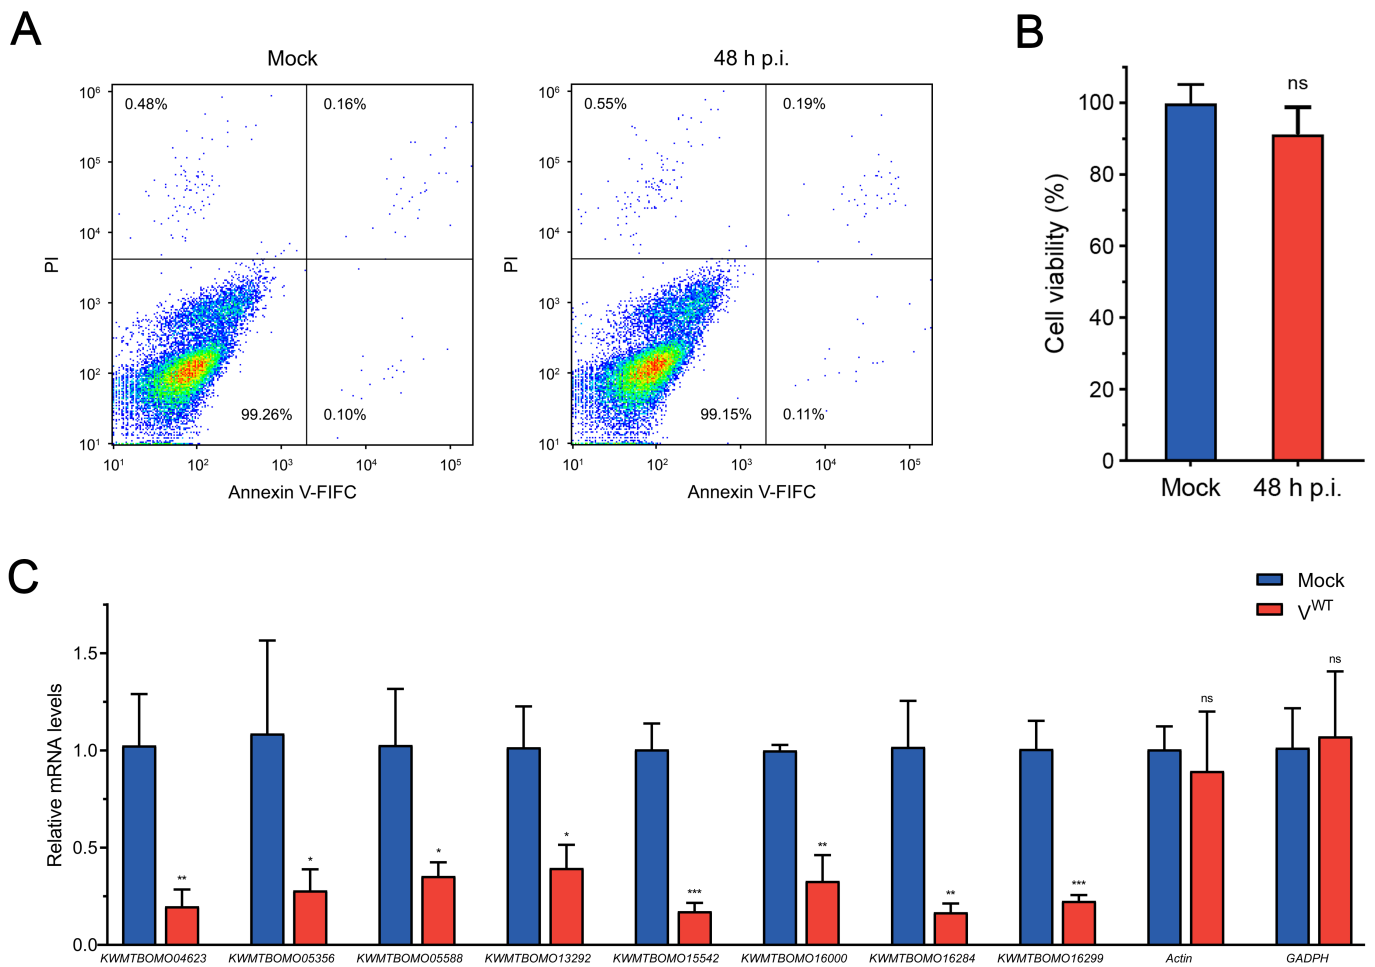

**Fig.S4 Cell state after BmNPV infection.**

**(A)** Flow cytometric assay for cell apoptosis detection in BmNPV infected cells at 48 h p.i.. The mock infected cells were used as the control. Cells were distinguished as viable (Annexin V-FITC<sup>-</sup>/PI<sup>-</sup>), early apoptotic (Annexin V-FITC<sup>+</sup>/PI<sup>-</sup>), late apoptotic (Annexin V-FITC<sup>+</sup>/PI<sup>+</sup>), and necrotic (Annexin V-FITC<sup>-</sup>/PI<sup>+</sup>).

**(B)** Cell viability of BmNPV infected cells at 48 h p.i.. Three biological replicates per treatment were analyzed (n = 3). Mock infected cells were served as the control. Error bar indicated the standard deviation. Two-tailed *t*-test; ns means no significance observed.

**(C)** qRT-PCR analysis for changes in the expression of antiviral genes at 48 h p.i.. Two housekeeping genes, *Actin* and *GADPH* were served as the control genes with no significant change on mRNA level after BmNPV infection. *Rpl32* was used as the reference gene for data normalization. Three technical replicates for each of another three biological replicates per treatment were analyzed (n = 3). Error bar indicated the standard deviation. Two-tailed *t*-test; \**P* < 0.05, \*\**P* < 0.01, \*\*\**P* < 0.001 versus mock, ns means no significance observed.
