# Supplementary material for: Genome-wide chromatin interaction profiling reveals a vital role of super-enhancers and rearrangements in host enhancer contacts during BmNPV infection
Source: HighWire-hosted journal article supplement (doi:10.1101/gr.277931.123), 2023-10-23
Supplement: Supplemental_Fig_S5.pdf [file Supplemental_Fig_S5.pdf]

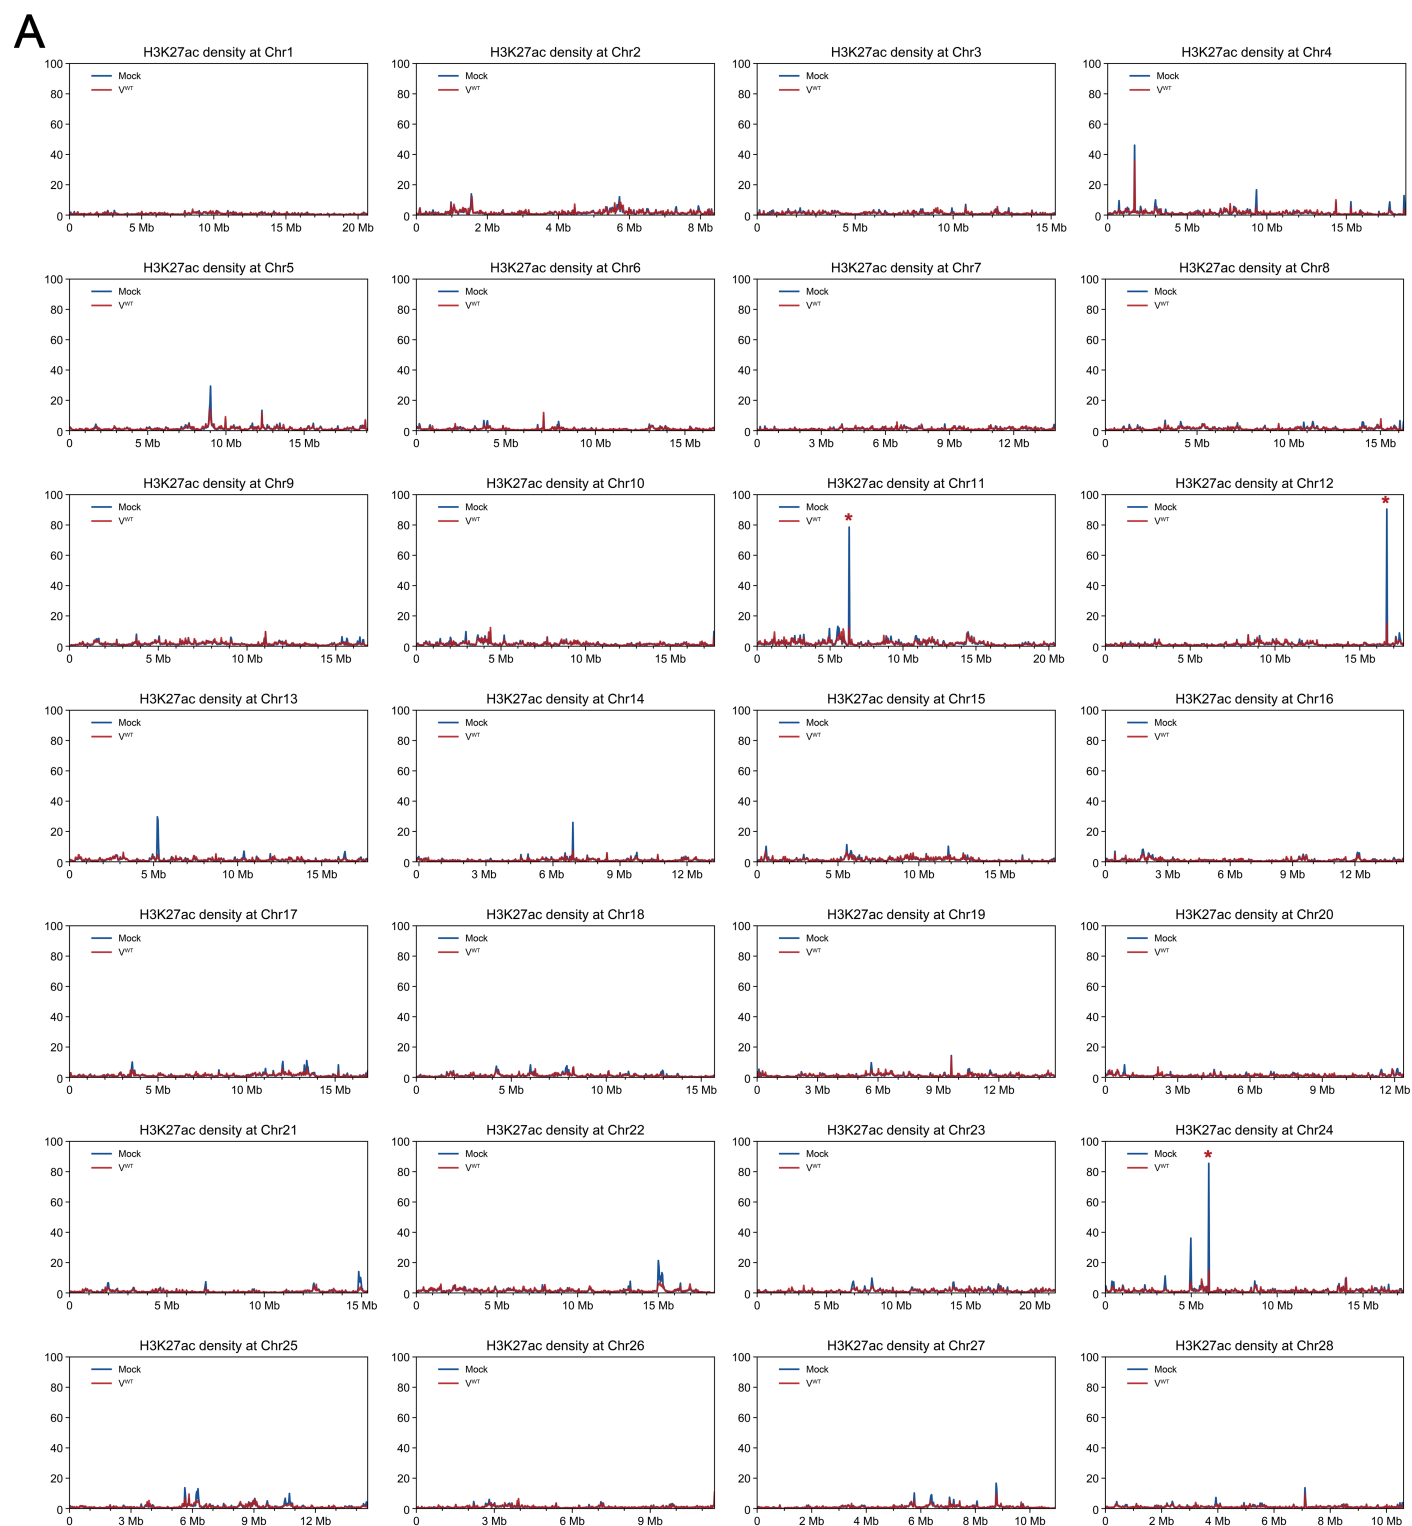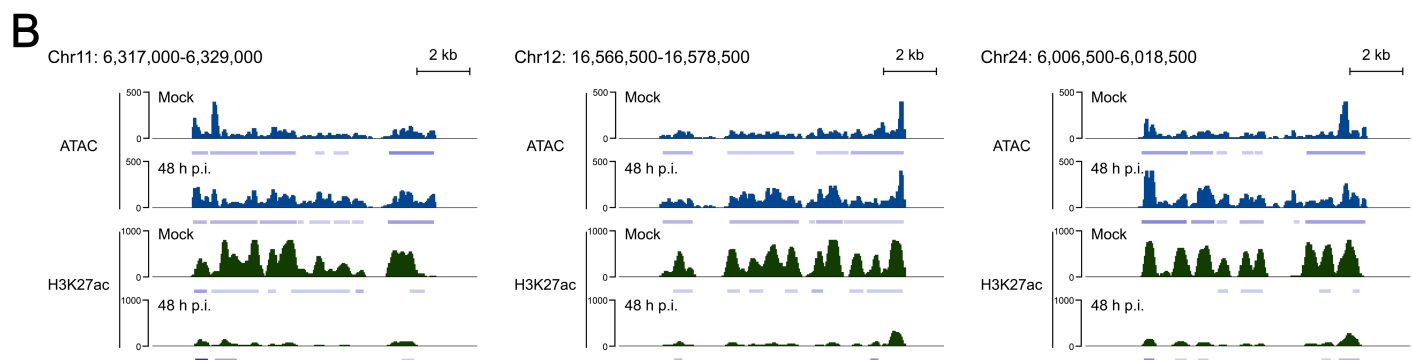

**Fig.S5 Normalized H3K27ac density around each chromosome.**

(A) Normalized H3K27ac density around each chromosome in mock (blue) or BmNPV (red) infected cells.

(B) Chromatin accessibility and H3K27ac density in detail at the three asterisk marked regions with largest changes in H3K27Ac occupancy in (A).
