# Supplementary material for: Genome-wide chromatin interaction profiling reveals a vital role of super-enhancers and rearrangements in host enhancer contacts during BmNPV infection
Source: HighWire-hosted journal article supplement (doi:10.1101/gr.277931.123), 2023-10-23
Supplement: Supplemental_Fig_S6.pdf [file Supplemental_Fig_S6.pdf]

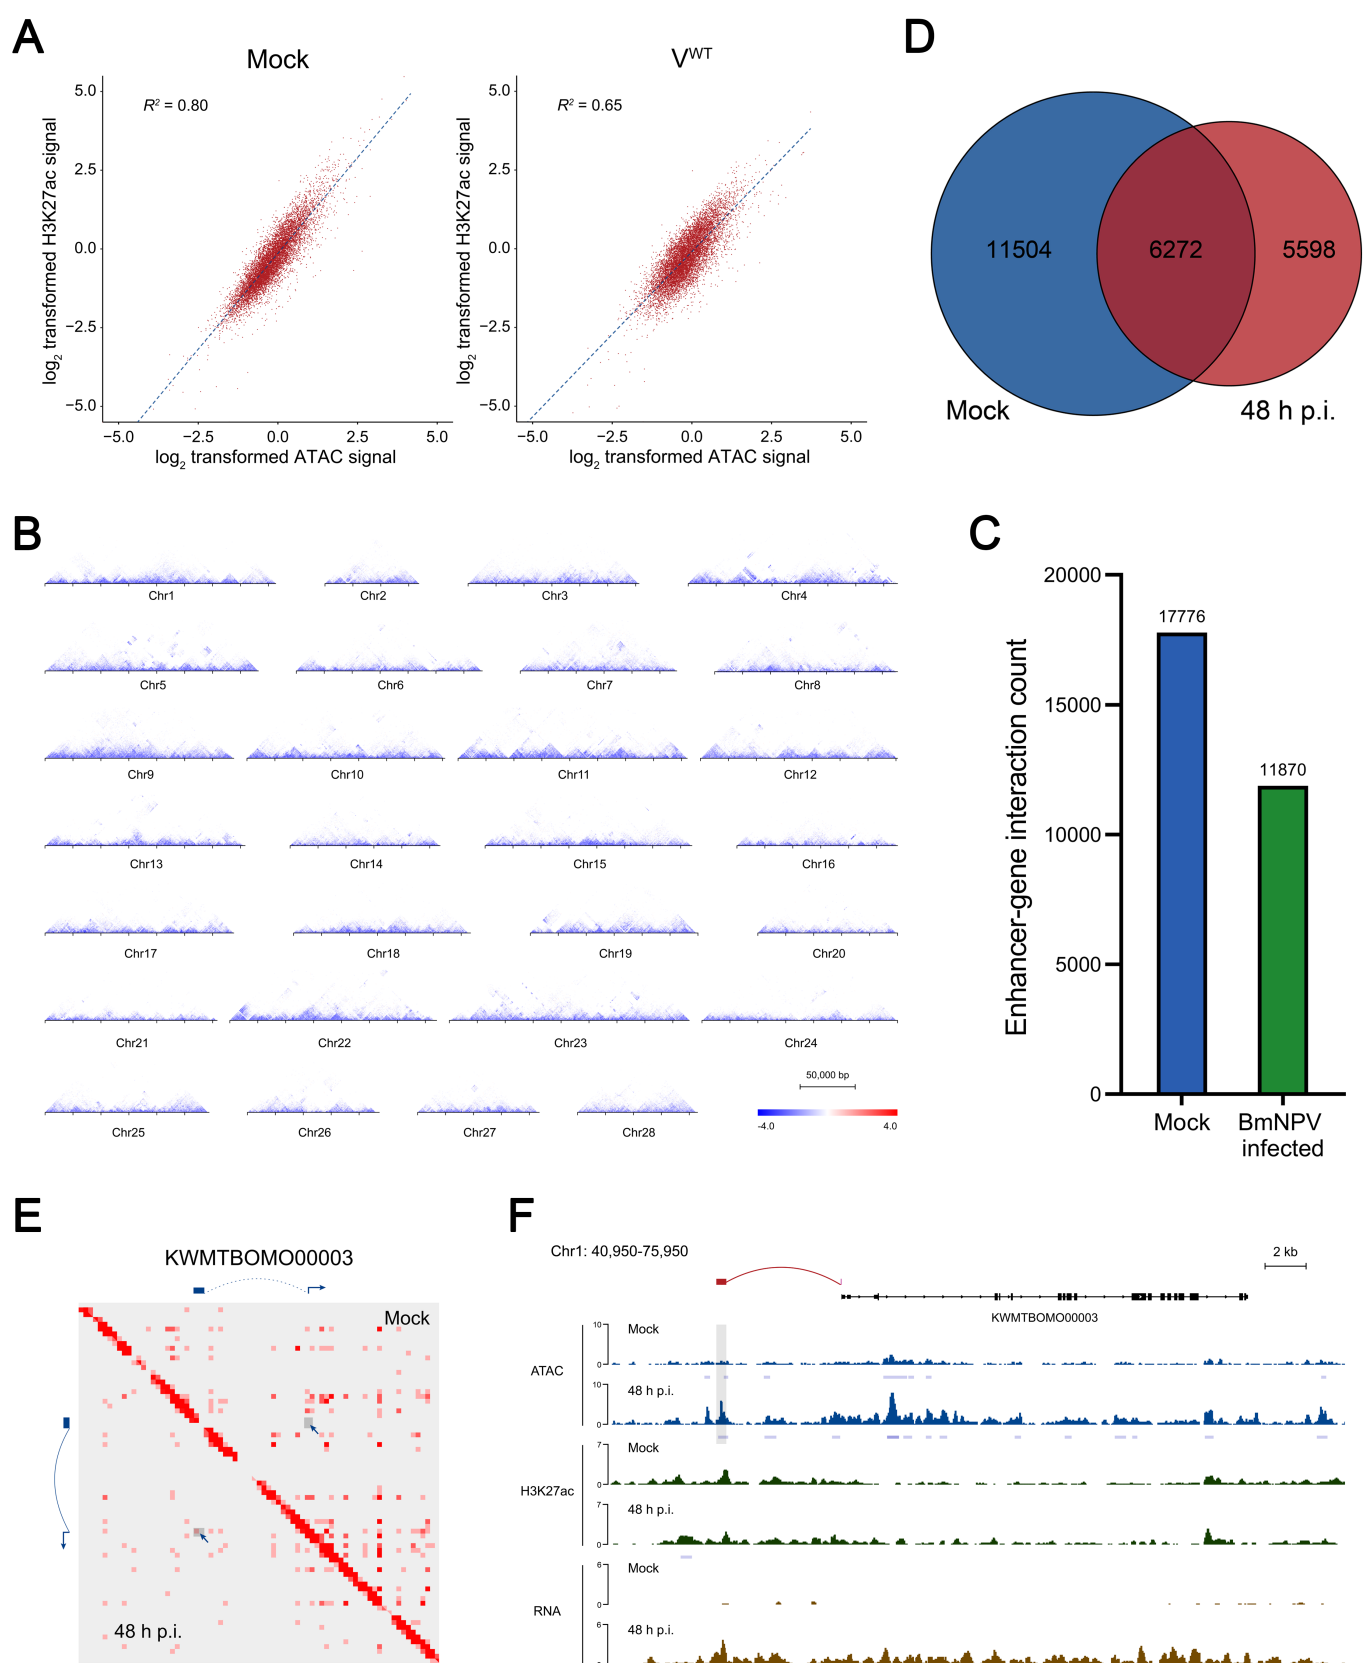

**Fig.S6 BmNPV-induced changes on host chromatin state.**

(A) Scatter plot with R-squared of regression fit depicting the coincidence degree between chromatin accessibility and H3K27ac modification in mock infected cells (left) or after 48 h of BmNPV infection (right) ( $\log_2$  transformed data).

(B) Hi-C assays exhibited the attenuation on *cis*-interaction of host chromatin after 48 h of BmNPV infection ( $\log_2$  transformed data).

(C) The number of enhancer-gene contacts in uninfected and BmNPV-infected cells.

(D) Venn diagrams showing the overlaps of enhancer-gene connections between mock and BmNPV infected cells. *Fisher* exact test;  $P < 10^{-15}$ .

(E) Hi-C result depicting the interaction of a newly formed enhancer-gene contact after BmNPV infection. Shaded regions are representative of the newly formed chromatin interaction in the Hi-C heatmap after infection. The depth of red color represents the strength of interaction.

(F) Normalized ATAC-seq, H3K27ac ChIP-seq and RNA-seq profiles exhibiting the regulatory network at *KWMTBOMO00003* after infection, which is an example of the newly formed enhancers-gene contact. Shaded region showed that the enhancer gained accessibility after BmNPV infection.
