# Supplementary material for: Genome-wide chromatin interaction profiling reveals a vital role of super-enhancers and rearrangements in host enhancer contacts during BmNPV infection
Source: HighWire-hosted journal article supplement (doi:10.1101/gr.277931.123), 2023-10-23
Supplement: Supplemental_Fig_S7.pdf [file Supplemental_Fig_S7.pdf]

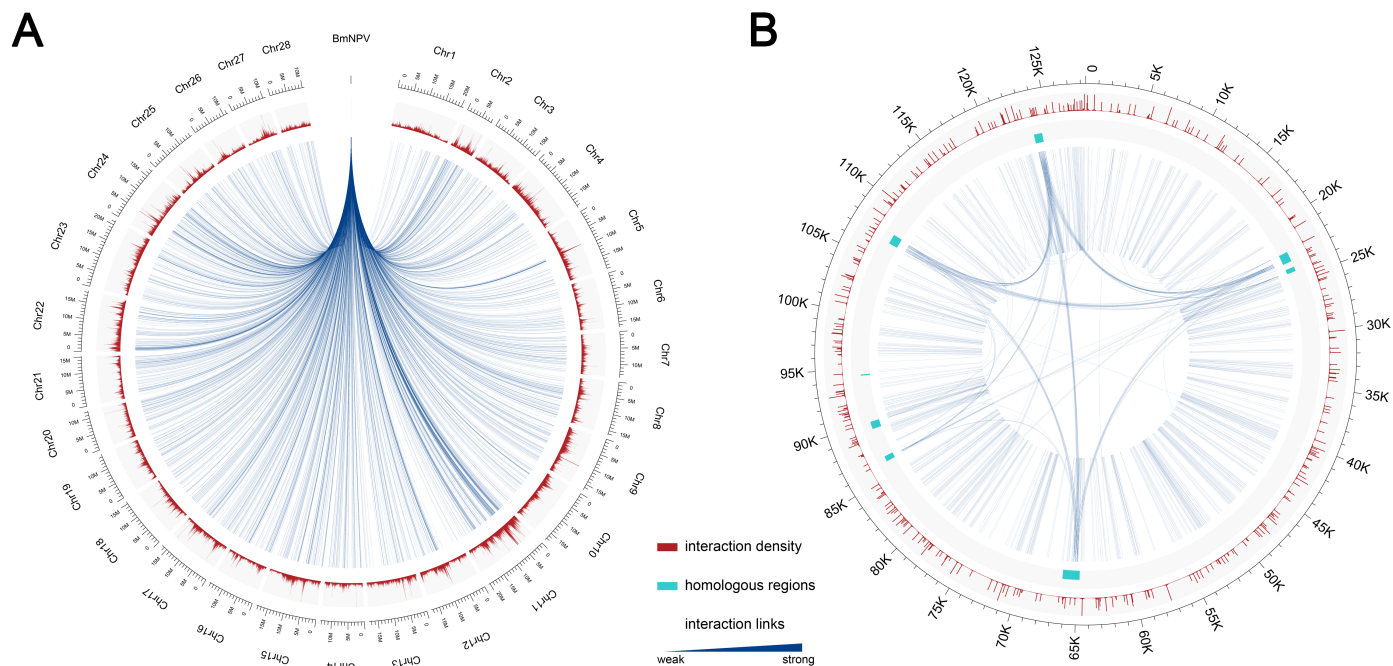

**Fig.S7 Significant DNA interaction of BmNPV-host and BmNPV-BmNPV.**

**(A)** Landscape of significant interactions between the genome of BmNPV and the host.

**(B)** Landscape of significant interactions in the genome of BmNPV.
