# Supplementary material for: Genome-wide chromatin interaction profiling reveals a vital role of super-enhancers and rearrangements in host enhancer contacts during BmNPV infection
Source: HighWire-hosted journal article supplement (doi:10.1101/gr.277931.123), 2023-10-23
Supplement: Supplemental_Fig_S9.pdf [file Supplemental_Fig_S9.pdf]

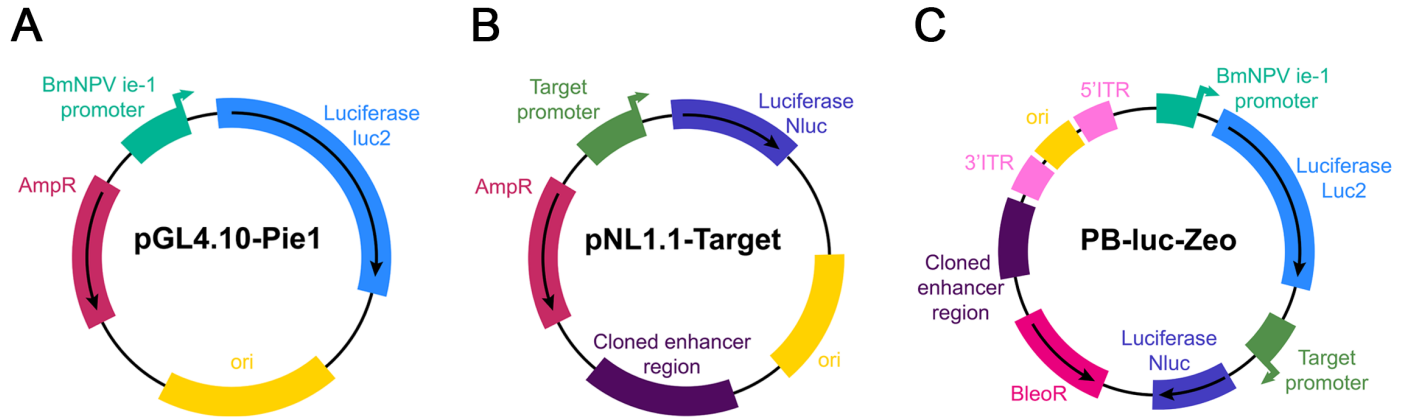

**Fig.S9 Schematic diagram of constructed plasmids for dual luciferase reporter assay.**

(A) Schematic diagram of the internal reference vector pGL4.10-Pie1 harboring the promoter of BmNPV *ie-1* before *luc2*.

(B) Schematic diagram of the vector pNL1.1-Target harboring target promoter and cloned enhancer region for enhancer activity analysis.

(C) Schematic diagram of the vector PB-luc-Zeo used for transposition of the dual luciferase reporter to the genome.
