# Supplementary material for: Genome-wide chromatin interaction profiling reveals a vital role of super-enhancers and rearrangements in host enhancer contacts during BmNPV infection
Source: HighWire-hosted journal article supplement (doi:10.1101/gr.277931.123), 2023-10-23
Supplement: Supplemental_Fig_S10.pdf [file Supplemental_Fig_S10.pdf]

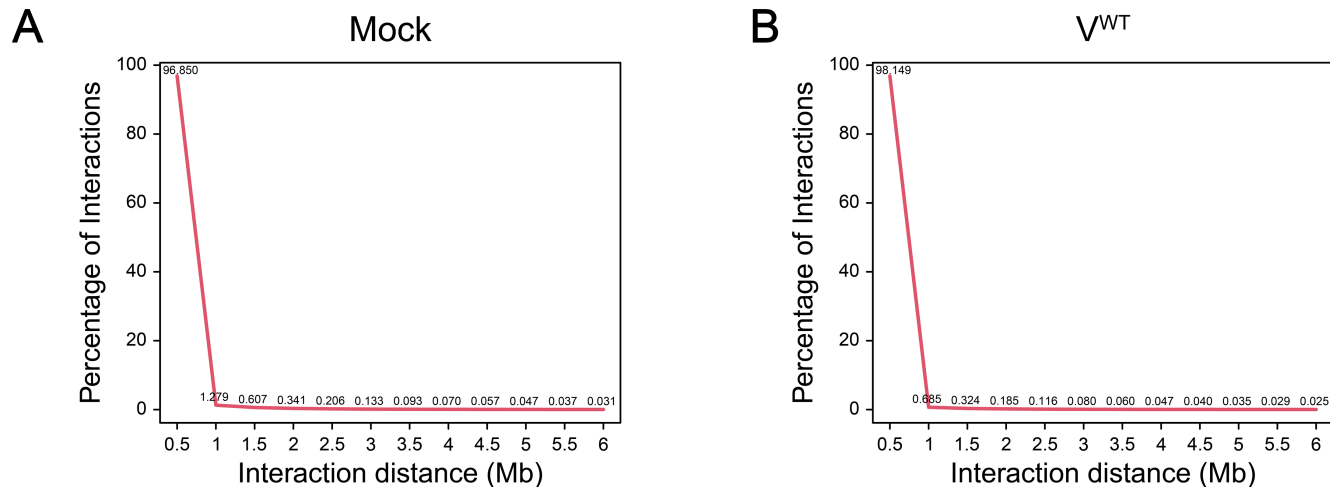

**Fig.S10 Interaction frequency in different distances.**

**(A)** Percentage of interactions at different interaction distances in mock infected cells.

**(B)** Percentage of interactions at different interaction distances in BmNPV infected cells.
