# Supplementary material for: Genome-wide chromatin interaction profiling reveals a vital role of super-enhancers and rearrangements in host enhancer contacts during BmNPV infection
Source: HighWire-hosted journal article supplement (doi:10.1101/gr.277931.123), 2023-10-23
Supplement: Supplemental_Fig_S12.pdf [file Supplemental_Fig_S12.pdf]

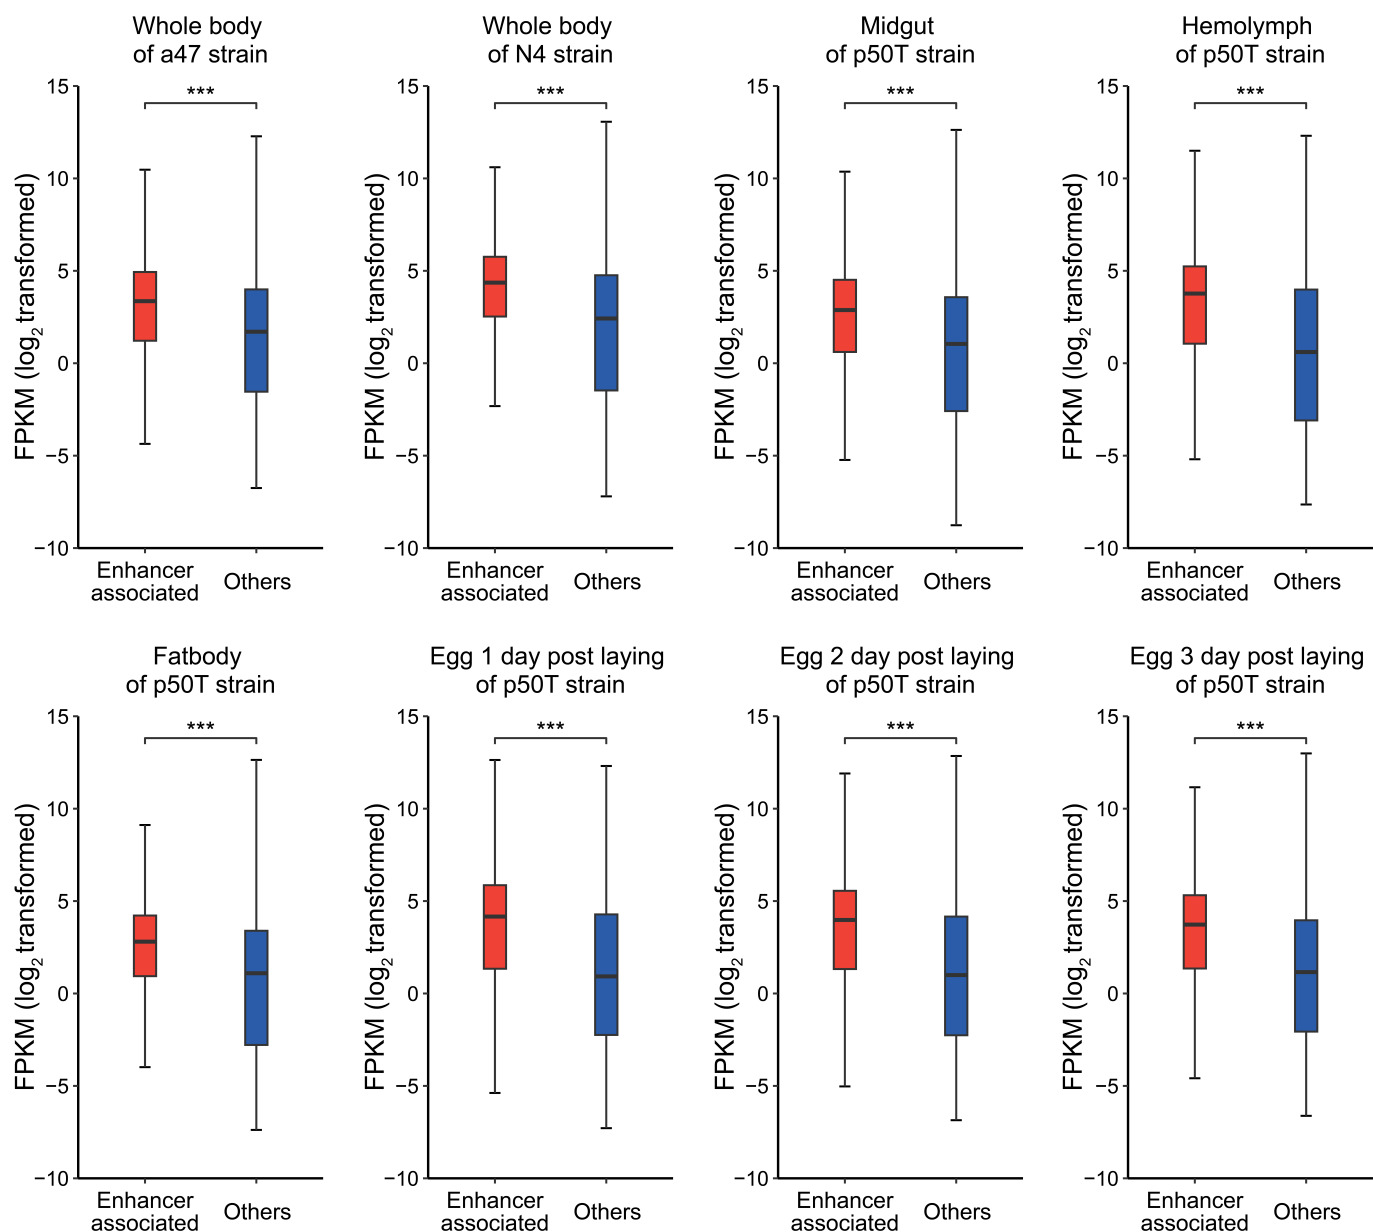

**Fig.S12 Regulatory role of TEs in different tissues of various silkworm strains.**

Relative expression levels of enhancer-associated genes and non-associated genes (log-transformed data) in indicated tissues and silkworm strains. Box plots indicated the median (center of box), lower and upper quartiles (bounds of box), minimum and maximum values (bars). Two-tailed *Wilcoxon* rank-sum test; \*\*\* $P < 10^{-15}$  versus TEs.
