# Supplementary material for: Genome-wide chromatin interaction profiling reveals a vital role of super-enhancers and rearrangements in host enhancer contacts during BmNPV infection
Source: HighWire-hosted journal article supplement (doi:10.1101/gr.277931.123), 2023-10-23
Supplement: Supplemental_Table_S2.xlsx [file Supplemental_Table_S2.xlsx]

## Sheet: Supplemental Table S2
Supplemental Table S2. List of the enhancer-gene connections in BmN cells.
chr	enhancer_start	enhancer_end	TargetGene	TargetTSS	ABC.Score
Bomo_Chr1	103657	104292	KWMTBOMO00005	118755	0.028229
Bomo_Chr1	105802	106305	KWMTBOMO00005	118755	0.027305
Bomo_Chr1	109674	110596	KWMTBOMO00005	118755	0.050296
Bomo_Chr1	110820	111320	KWMTBOMO00005	118755	0.022629
Bomo_Chr1	111429	111929	KWMTBOMO00005	118755	0.033013
Bomo_Chr1	116859	117359	KWMTBOMO00005	118755	0.024191
Bomo_Chr1	122559	123744	KWMTBOMO00005	118755	0.046339
Bomo_Chr1	122559	123744	KWMTBOMO00006	142035	0.04917
Bomo_Chr1	136464	138000	KWMTBOMO00005	118755	0.034347
Bomo_Chr1	136464	138000	KWMTBOMO00006	142035	0.070929
Bomo_Chr1	317543	319237	KWMTBOMO00009	310965	0.038795
Bomo_Chr1	328822	330051	KWMTBOMO00009	310965	0.046391
Bomo_Chr1	328822	330051	KWMTBOMO00010	340776	0.022138
Bomo_Chr1	337964	339239	KWMTBOMO00009	310965	0.027283
Bomo_Chr1	337964	339239	KWMTBOMO00010	340776	0.033186
Bomo_Chr1	348779	349950	KWMTBOMO00005	118755	0.030138
Bomo_Chr1	348779	349950	KWMTBOMO00006	142035	0.024376
Bomo_Chr1	348779	349950	KWMTBOMO00009	310965	0.055661
Bomo_Chr1	348779	349950	KWMTBOMO00010	340776	0.12898
Bomo_Chr1	348779	349950	KWMTBOMO00016	429286	0.024582
Bomo_Chr1	350232	350732	KWMTBOMO00010	340776	0.039134
Bomo_Chr1	356821	357830	KWMTBOMO00005	118755	0.034016
Bomo_Chr1	356821	357830	KWMTBOMO00006	142035	0.020862
Bomo_Chr1	356821	357830	KWMTBOMO00009	310965	0.041547
Bomo_Chr1	356821	357830	KWMTBOMO00010	340776	0.097877
Bomo_Chr1	357869	358369	KWMTBOMO00010	340776	0.022313
Bomo_Chr1	397297	397797	KWMTBOMO00016	429286	0.027301
Bomo_Chr1	431625	432423	KWMTBOMO00016	429286	0.028861
Bomo_Chr1	432874	434180	KWMTBOMO00016	429286	0.055242
Bomo_Chr1	434511	435011	KWMTBOMO00016	429286	0.020472
Bomo_Chr1	558078	558866	KWMTBOMO00020	550815	0.04062
Bomo_Chr1	558078	558866	KWMTBOMO00021	552536	0.040611
Bomo_Chr1	558078	558866	KWMTBOMO00022	564496	0.027404
Bomo_Chr1	560300	561270	KWMTBOMO00020	550815	0.043672
Bomo_Chr1	560300	561270	KWMTBOMO00021	552536	0.043663
Bomo_Chr1	560300	561270	KWMTBOMO00022	564496	0.064902
Bomo_Chr1	560300	561270	KWMTBOMO00023	606255	0.033439
Bomo_Chr1	560300	561270	KWMTBOMO00024	607796	0.033436
Bomo_Chr1	560300	561270	KWMTBOMO00025	637225	0.021375
Bomo_Chr1	561900	562400	KWMTBOMO00022	564496	0.020254
Bomo_Chr1	595942	596966	KWMTBOMO00022	564496	0.029805
Bomo_Chr1	595942	596966	KWMTBOMO00023	606255	0.051321
Bomo_Chr1	595942	596966	KWMTBOMO00024	607796	0.051316
Bomo_Chr1	604973	605473	KWMTBOMO00023	606255	0.023226
Bomo_Chr1	604973	605473	KWMTBOMO00024	607796	0.023223
Bomo_Chr1	638928	639637	KWMTBOMO00025	637225	0.035171
Bomo_Chr1	1220338	1222742	KWMTBOMO00038	1247525	0.042715
Bomo_Chr1	1245136	1245636	KWMTBOMO00038	1247525	0.023339
Bomo_Chr1	1245764	1246264	KWMTBOMO00038	1247525	0.020575
Bomo_Chr1	1248263	1248874	KWMTBOMO00038	1247525	0.024031
Bomo_Chr1	1249253	1250061	KWMTBOMO00038	1247525	0.050241
Bomo_Chr1	1330182	1331373	KWMTBOMO00045	1333031	0.074493
Bomo_Chr1	1334506	1335006	KWMTBOMO00045	1333031	0.028958
Bomo_Chr1	1341171	1341671	KWMTBOMO00045	1333031	0.020554
Bomo_Chr1	1456376	1456876	KWMTBOMO00051	1448811	0.031108
Bomo_Chr1	1801571	1802253	KWMTBOMO00058	1816511	0.034442
Bomo_Chr1	1806412	1806912	KWMTBOMO00058	1816511	0.023655
Bomo_Chr1	1810808	1811308	KWMTBOMO00058	1816511	0.021172
Bomo_Chr1	1812206	1813663	KWMTBOMO00058	1816511	0.077193
Bomo_Chr1	1812206	1813663	KWMTBOMO00057	1833570	0.041721
Bomo_Chr1	1812206	1813663	KWMTBOMO00059	1834761	0.04172
Bomo_Chr1	1814868	1815368	KWMTBOMO00058	1816511	0.025993
Bomo_Chr1	1818864	1820243	KWMTBOMO00058	1816511	0.025455
Bomo_Chr1	1820938	1821438	KWMTBOMO00058	1816511	0.022569
Bomo_Chr1	1820938	1821438	KWMTBOMO00057	1833570	0.020299
Bomo_Chr1	1820938	1821438	KWMTBOMO00059	1834761	0.020298
Bomo_Chr1	1870224	1871040	KWMTBOMO00057	1833570	0.024405
Bomo_Chr1	1870224	1871040	KWMTBOMO00059	1834761	0.024405
Bomo_Chr1	1870224	1871040	KWMTBOMO00060	1903950	0.023741
Bomo_Chr1	1870224	1871040	KWMTBOMO00061	1906431	0.02374
Bomo_Chr1	1894715	1895495	KWMTBOMO00060	1903950	0.028457
Bomo_Chr1	1894715	1895495	KWMTBOMO00061	1906431	0.028455
Bomo_Chr1	1895649	1896582	KWMTBOMO00060	1903950	0.021021
Bomo_Chr1	1895649	1896582	KWMTBOMO00061	1906431	0.02102
Bomo_Chr1	1910357	1911091	KWMTBOMO00060	1903950	0.031474
Bomo_Chr1	1910357	1911091	KWMTBOMO00061	1906431	0.031472
Bomo_Chr1	1910357	1911091	KWMTBOMO00062	1945501	0.032869
Bomo_Chr1	1947789	1948578	KWMTBOMO00062	1945501	0.035713
Bomo_Chr1	2043008	2043508	KWMTBOMO00067	2048656	0.02121
Bomo_Chr1	2043721	2044476	KWMTBOMO00067	2048656	0.04097
Bomo_Chr1	2069205	2070476	KWMTBOMO00067	2048656	0.024473
Bomo_Chr1	2236792	2238058	KWMTBOMO00073	2190926	0.020672
Bomo_Chr1	2239897	2241122	KWMTBOMO00073	2190926	0.026061
Bomo_Chr1	2296602	2297416	KWMTBOMO00079	2293427	0.038534
Bomo_Chr1	2296602	2297416	KWMTBOMO00080	2315357	0.021051
Bomo_Chr1	2313868	2314717	KWMTBOMO00080	2315357	0.027486
Bomo_Chr1	2333844	2335026	KWMTBOMO00080	2315357	0.022392
Bomo_Chr1	2339032	2340127	KWMTBOMO00080	2315357	0.022191
Bomo_Chr1	2471524	2472615	KWMTBOMO00083	2477286	0.030325
Bomo_Chr1	2471524	2472615	KWMTBOMO00084	2483747	0.029318
Bomo_Chr1	2472769	2473677	KWMTBOMO00083	2477286	0.04672
Bomo_Chr1	2472769	2473677	KWMTBOMO00084	2483747	0.045168
Bomo_Chr1	2474405	2474905	KWMTBOMO00083	2477286	0.022463
Bomo_Chr1	2474405	2474905	KWMTBOMO00084	2483747	0.021717
Bomo_Chr1	2481852	2482921	KWMTBOMO00083	2477286	0.034869
Bomo_Chr1	2481852	2482921	KWMTBOMO00084	2483747	0.041589
Bomo_Chr1	2545053	2545845	KWMTBOMO00086	2531756	0.027563
Bomo_Chr1	2545053	2545845	KWMTBOMO00087	2535187	0.027562
Bomo_Chr1	2565867	2566801	KWMTBOMO00086	2531756	0.030314
Bomo_Chr1	2565867	2566801	KWMTBOMO00087	2535187	0.030314
Bomo_Chr1	2565867	2566801	KWMTBOMO00089	2565146	0.092867
Bomo_Chr1	2567002	2567502	KWMTBOMO00089	2565146	0.029975
Bomo_Chr1	2643767	2644419	KWMTBOMO00091	2658046	0.037929
Bomo_Chr1	2643767	2644419	KWMTBOMO00093	2668286	0.022949
Bomo_Chr1	2643767	2644419	KWMTBOMO00094	2688957	0.020119
Bomo_Chr1	2645044	2646096	KWMTBOMO00091	2658046	0.036342
Bomo_Chr1	2645044	2646096	KWMTBOMO00093	2668286	0.021989
Bomo_Chr1	2652965	2653465	KWMTBOMO00091	2658046	0.029729
Bomo_Chr1	2652965	2653465	KWMTBOMO00093	2668286	0.029932
Bomo_Chr1	2654359	2654859	KWMTBOMO00091	2658046	0.031971
Bomo_Chr1	2654359	2654859	KWMTBOMO00093	2668286	0.032189
Bomo_Chr1	2655150	2655650	KWMTBOMO00091	2658046	0.023898
Bomo_Chr1	2655150	2655650	KWMTBOMO00093	2668286	0.024061
Bomo_Chr1	2663771	2664622	KWMTBOMO00093	2668286	0.023811
Bomo_Chr1	2674915	2675617	KWMTBOMO00093	2668286	0.022896
Bomo_Chr1	2676770	2677660	KWMTBOMO00091	2658046	0.035441
Bomo_Chr1	2676770	2677660	KWMTBOMO00093	2668286	0.054094
Bomo_Chr1	2676770	2677660	KWMTBOMO00094	2688957	0.042737
Bomo_Chr1	2684932	2685716	KWMTBOMO00091	2658046	0.025977
Bomo_Chr1	2684932	2685716	KWMTBOMO00093	2668286	0.028941
Bomo_Chr1	2684932	2685716	KWMTBOMO00094	2688957	0.042026
Bomo_Chr1	2686266	2687097	KWMTBOMO00091	2658046	0.027009
Bomo_Chr1	2686266	2687097	KWMTBOMO00093	2668286	0.03009
Bomo_Chr1	2686266	2687097	KWMTBOMO00094	2688957	0.043694
Bomo_Chr1	2687359	2687859	KWMTBOMO00094	2688957	0.021581
Bomo_Chr1	2690089	2691205	KWMTBOMO00091	2658046	0.032313
Bomo_Chr1	2690089	2691205	KWMTBOMO00093	2668286	0.034567
Bomo_Chr1	2690089	2691205	KWMTBOMO00094	2688957	0.056953
Bomo_Chr1	2765114	2765614	KWMTBOMO00096	2766766	0.032915
Bomo_Chr1	2765720	2766220	KWMTBOMO00096	2766766	0.025223
Bomo_Chr1	2770210	2770888	KWMTBOMO00096	2766766	0.023508
Bomo_Chr1	2774668	2775999	KWMTBOMO00096	2766766	0.023033
Bomo_Chr1	2928340	2929304	KWMTBOMO00097	2904346	0.023638
Bomo_Chr1	2928340	2929304	KWMTBOMO00098	2926865	0.045666
Bomo_Chr1	2928340	2929304	KWMTBOMO00099	2963456	0.021545
Bomo_Chr1	2929624	2930491	KWMTBOMO00098	2926865	0.047361
Bomo_Chr1	2929624	2930491	KWMTBOMO00099	2963456	0.024186
Bomo_Chr1	2960647	2961147	KWMTBOMO00099	2963456	0.02287
Bomo_Chr1	2961790	2962568	KWMTBOMO00099	2963456	0.024243
Bomo_Chr1	3140302	3140802	KWMTBOMO00103	3163905	0.020711
Bomo_Chr1	3140976	3141816	KWMTBOMO00103	3163905	0.064139
Bomo_Chr1	3140976	3141816	KWMTBOMO00104	3189785	0.044479
Bomo_Chr1	3140976	3141816	KWMTBOMO00105	3191446	0.039655
Bomo_Chr1	3140976	3141816	KWMTBOMO00108	3232575	0.023189
Bomo_Chr1	3140976	3141816	KWMTBOMO00109	3235536	0.023188
Bomo_Chr1	3143190	3143690	KWMTBOMO00103	3163905	0.022157
Bomo_Chr1	3155680	3157169	KWMTBOMO00103	3163905	0.04079
Bomo_Chr1	3157765	3158875	KWMTBOMO00103	3163905	0.020937
Bomo_Chr1	3190360	3190860	KWMTBOMO00105	3191446	0.023967
Bomo_Chr1	3242978	3243921	KWMTBOMO00108	3232575	0.037834
Bomo_Chr1	3242978	3243921	KWMTBOMO00109	3235536	0.037833
Bomo_Chr1	3244189	3245066	KWMTBOMO00108	3232575	0.043276
Bomo_Chr1	3244189	3245066	KWMTBOMO00109	3235536	0.043275
Bomo_Chr1	3675103	3676610	KWMTBOMO00116	3677795	0.061277
Bomo_Chr1	3675103	3676610	KWMTBOMO00117	3679665	0.061253
Bomo_Chr1	3676784	3677284	KWMTBOMO00116	3677795	0.036479
Bomo_Chr1	3676784	3677284	KWMTBOMO00117	3679665	0.036465
Bomo_Chr1	3678398	3678898	KWMTBOMO00116	3677795	0.025169
Bomo_Chr1	3678398	3678898	KWMTBOMO00117	3679665	0.025159
Bomo_Chr1	3781839	3782339	KWMTBOMO00122	3785226	0.022529
Bomo_Chr1	3977825	3978524	KWMTBOMO00128	3972675	0.040559
Bomo_Chr1	3979906	3981075	KWMTBOMO00128	3972675	0.071938
Bomo_Chr1	3984395	3985202	KWMTBOMO00128	3972675	0.020383
Bomo_Chr1	4028147	4029402	KWMTBOMO00128	3972675	0.023348
Bomo_Chr1	4028147	4029402	KWMTBOMO00129	4048965	0.050901
Bomo_Chr1	4029972	4031160	KWMTBOMO00129	4048965	0.042103
Bomo_Chr1	4042280	4043133	KWMTBOMO00129	4048965	0.035233
Bomo_Chr1	4051122	4052451	KWMTBOMO00129	4048965	0.052677
Bomo_Chr1	4318164	4318738	KWMTBOMO00136	4297838	0.022443
Bomo_Chr1	4348270	4349737	KWMTBOMO00135	4282059	0.022141
Bomo_Chr1	4348270	4349737	KWMTBOMO00136	4297838	0.024913
Bomo_Chr1	4351843	4352949	KWMTBOMO00136	4297838	0.020018
Bomo_Chr1	4692861	4693514	KWMTBOMO00147	4680073	0.020228
Bomo_Chr1	4699688	4700378	KWMTBOMO00149	4695004	0.024268
Bomo_Chr1	4704853	4705353	KWMTBOMO00149	4695004	0.020492
Bomo_Chr1	4772798	4773649	KWMTBOMO00152	4784783	0.022273
Bomo_Chr1	4988474	4989426	KWMTBOMO00157	4985306	0.054119
Bomo_Chr1	5021070	5022106	KWMTBOMO00157	4985306	0.021146
Bomo_Chr1	5021070	5022106	KWMTBOMO00159	5023367	0.049096
Bomo_Chr1	5021070	5022106	KWMTBOMO00160	5033747	0.047624
Bomo_Chr1	5590224	5591828	KWMTBOMO00176	5616783	0.0228
Bomo_Chr1	5692682	5694087	KWMTBOMO00179	5667652	0.021222
Bomo_Chr1	5692682	5694087	KWMTBOMO00180	5702272	0.033693
Bomo_Chr1	5692682	5694087	KWMTBOMO00181	5704293	0.033693
Bomo_Chr1	5869580	5871388	KWMTBOMO00182	5874052	0.038513
Bomo_Chr1	5869580	5871388	KWMTBOMO00183	5883513	0.035094
Bomo_Chr1	5869580	5871388	KWMTBOMO00184	5918913	0.024497
Bomo_Chr1	5895318	5896503	KWMTBOMO00183	5883513	0.028403
Bomo_Chr1	5910962	5911743	KWMTBOMO00182	5874052	0.029164
Bomo_Chr1	5910962	5911743	KWMTBOMO00183	5883513	0.030203
Bomo_Chr1	5910962	5911743	KWMTBOMO00184	5918913	0.040359
Bomo_Chr1	5910962	5911743	KWMTBOMO00187	5978092	0.042961
Bomo_Chr1	5912674	5913244	KWMTBOMO00182	5874052	0.022702
Bomo_Chr1	5912674	5913244	KWMTBOMO00183	5883513	0.02351
Bomo_Chr1	5912674	5913244	KWMTBOMO00184	5918913	0.031416
Bomo_Chr1	5912674	5913244	KWMTBOMO00187	5978092	0.033441
Bomo_Chr1	6005453	6006014	KWMTBOMO00189	5998702	0.020111
Bomo_Chr1	6008099	6008599	KWMTBOMO00189	5998702	0.024961
Bomo_Chr1	6133556	6134386	KWMTBOMO00192	6157932	0.026535
Bomo_Chr1	6133556	6134386	KWMTBOMO00193	6167042	0.020602
Bomo_Chr1	6133556	6134386	KWMTBOMO00194	6173933	0.020873
Bomo_Chr1	6159082	6159964	KWMTBOMO00192	6157932	0.02567
Bomo_Chr1	6159082	6159964	KWMTBOMO00193	6167042	0.023355
Bomo_Chr1	6171658	6172529	KWMTBOMO00193	6167042	0.020472
Bomo_Chr1	6171658	6172529	KWMTBOMO00194	6173933	0.023974
Bomo_Chr1	6171658	6172529	KWMTBOMO00195	6184082	0.025263
Bomo_Chr1	6171658	6172529	KWMTBOMO00196	6185423	0.025252
Bomo_Chr1	6178159	6178659	KWMTBOMO00194	6173933	0.022054
Bomo_Chr1	6178159	6178659	KWMTBOMO00195	6184082	0.02324
Bomo_Chr1	6178159	6178659	KWMTBOMO00196	6185423	0.02323
Bomo_Chr1	6261869	6262551	KWMTBOMO00199	6272752	0.022226
Bomo_Chr1	6261869	6262551	KWMTBOMO00200	6273243	0.022226
Bomo_Chr1	6287558	6288518	KWMTBOMO00199	6272752	0.022315
Bomo_Chr1	6287558	6288518	KWMTBOMO00200	6273243	0.022314
Bomo_Chr1	6287558	6288518	KWMTBOMO00201	6281373	0.024038
Bomo_Chr1	6340253	6340753	KWMTBOMO00203	6341653	0.024518
Bomo_Chr1	6345413	6346435	KWMTBOMO00203	6341653	0.027634
Bomo_Chr1	6429761	6431054	KWMTBOMO00206	6420051	0.041285
Bomo_Chr1	6429761	6431054	KWMTBOMO00207	6425490	0.041271
Bomo_Chr1	6607085	6608304	KWMTBOMO00210	6575250	0.043437
Bomo_Chr1	6607085	6608304	KWMTBOMO00211	6576261	0.043436
Bomo_Chr1	6608338	6609223	KWMTBOMO00210	6575250	0.041985
Bomo_Chr1	6608338	6609223	KWMTBOMO00211	6576261	0.041984
Bomo_Chr1	6610083	6611054	KWMTBOMO00210	6575250	0.030348
Bomo_Chr1	6610083	6611054	KWMTBOMO00211	6576261	0.030346
Bomo_Chr1	6611949	6613831	KWMTBOMO00210	6575250	0.056953
Bomo_Chr1	6611949	6613831	KWMTBOMO00211	6576261	0.056951
Bomo_Chr1	6611949	6613831	KWMTBOMO00214	6849914	0.026393
Bomo_Chr1	6613982	6614937	KWMTBOMO00210	6575250	0.023477
Bomo_Chr1	6613982	6614937	KWMTBOMO00211	6576261	0.023477
Bomo_Chr1	6810159	6810667	KWMTBOMO00213	6816114	0.06397
Bomo_Chr1	6810159	6810667	KWMTBOMO00214	6849914	0.026106
Bomo_Chr1	6812153	6812878	KWMTBOMO00213	6816114	0.029358
Bomo_Chr1	6818988	6819488	KWMTBOMO00213	6816114	0.020992
Bomo_Chr1	6819581	6820311	KWMTBOMO00213	6816114	0.028114
Bomo_Chr1	6820731	6821645	KWMTBOMO00213	6816114	0.03707
Bomo_Chr1	6820731	6821645	KWMTBOMO00214	6849914	0.031653
Bomo_Chr1	7992804	7993304	KWMTBOMO00235	8005130	0.029452
Bomo_Chr1	7999909	8001245	KWMTBOMO00235	8005130	0.024373
Bomo_Chr1	8005688	8006912	KWMTBOMO00235	8005130	0.051553
Bomo_Chr1	8005688	8006912	KWMTBOMO00236	8010171	0.037698
Bomo_Chr1	8005688	8006912	KWMTBOMO00237	8017511	0.037695
Bomo_Chr1	8013974	8014689	KWMTBOMO00235	8005130	0.033598
Bomo_Chr1	8013974	8014689	KWMTBOMO00236	8010171	0.040806
Bomo_Chr1	8013974	8014689	KWMTBOMO00237	8017511	0.040802
Bomo_Chr1	8013974	8014689	KWMTBOMO00238	8035471	0.021283
Bomo_Chr1	8014941	8015441	KWMTBOMO00235	8005130	0.031111
Bomo_Chr1	8014941	8015441	KWMTBOMO00236	8010171	0.037785
Bomo_Chr1	8014941	8015441	KWMTBOMO00237	8017511	0.037782
Bomo_Chr1	8015514	8016064	KWMTBOMO00235	8005130	0.0245
Bomo_Chr1	8015514	8016064	KWMTBOMO00236	8010171	0.029756
Bomo_Chr1	8015514	8016064	KWMTBOMO00237	8017511	0.029753
Bomo_Chr1	8078118	8078960	KWMTBOMO00238	8035471	0.023415
Bomo_Chr1	8242258	8243444	KWMTBOMO00241	8252291	0.025001
Bomo_Chr1	8257601	8258468	KWMTBOMO00241	8252291	0.044495
Bomo_Chr1	8257601	8258468	KWMTBOMO00242	8273590	0.021873
Bomo_Chr1	8258756	8259256	KWMTBOMO00241	8252291	0.030926
Bomo_Chr1	8260683	8261607	KWMTBOMO00241	8252291	0.03115
Bomo_Chr1	8260683	8261607	KWMTBOMO00242	8273590	0.029259
Bomo_Chr1	8539292	8540745	KWMTBOMO00248	8464105	0.023847
Bomo_Chr1	8539292	8540745	KWMTBOMO00254	8532965	0.05693
Bomo_Chr1	8539292	8540745	KWMTBOMO00255	8534206	0.056912
Bomo_Chr1	8539292	8540745	KWMTBOMO00256	8546696	0.096701
Bomo_Chr1	8579410	8580667	KWMTBOMO00257	8572206	0.024065
Bomo_Chr1	8582883	8583828	KWMTBOMO00257	8572206	0.029232
Bomo_Chr1	8594326	8595127	KWMTBOMO00259	8604046	0.023157
Bomo_Chr1	8644557	8645200	KWMTBOMO00263	8633205	0.028874
Bomo_Chr1	8644557	8645200	KWMTBOMO00264	8643885	0.027742
Bomo_Chr1	8644557	8645200	KWMTBOMO00265	8646146	0.02774
Bomo_Chr1	8644557	8645200	KWMTBOMO00266	8654886	0.024684
Bomo_Chr1	8686528	8687908	KWMTBOMO00267	8681405	0.028604
Bomo_Chr1	8686528	8687908	KWMTBOMO00268	8698646	0.027398
Bomo_Chr1	8750049	8750879	KWMTBOMO00270	8728156	0.021457
Bomo_Chr1	8750049	8750879	KWMTBOMO00271	8739735	0.027202
Bomo_Chr1	8750049	8750879	KWMTBOMO00272	8779922	0.036569
Bomo_Chr1	8768520	8769787	KWMTBOMO00272	8779922	0.030396
Bomo_Chr1	8808825	8809776	KWMTBOMO00274	8808232	0.030197
Bomo_Chr1	8808825	8809776	KWMTBOMO00275	8813693	0.027271
Bomo_Chr1	8880670	8881489	KWMTBOMO00278	8874382	0.038958
Bomo_Chr1	8880670	8881489	KWMTBOMO00279	8878643	0.038953
Bomo_Chr1	8887502	8888770	KWMTBOMO00278	8874382	0.043003
Bomo_Chr1	8887502	8888770	KWMTBOMO00279	8878643	0.042997
Bomo_Chr1	8887502	8888770	KWMTBOMO00280	8911112	0.02128
Bomo_Chr1	8908533	8909401	KWMTBOMO00280	8911112	0.025638
Bomo_Chr1	8916164	8917951	KWMTBOMO00280	8911112	0.034055
Bomo_Chr1	8916164	8917951	KWMTBOMO00281	8920513	0.03263
Bomo_Chr1	8935594	8936517	KWMTBOMO00281	8920513	0.020875
Bomo_Chr1	8976979	8977969	KWMTBOMO00283	8967993	0.020374
Bomo_Chr1	8980540	8981828	KWMTBOMO00282	8950823	0.038842
Bomo_Chr1	8980540	8981828	KWMTBOMO00283	8967993	0.050782
Bomo_Chr1	8982309	8982861	KWMTBOMO00282	8950823	0.025896
Bomo_Chr1	8982309	8982861	KWMTBOMO00283	8967993	0.033856
Bomo_Chr1	8982944	8984415	KWMTBOMO00278	8874382	0.022009
Bomo_Chr1	8982944	8984415	KWMTBOMO00279	8878643	0.022006
Bomo_Chr1	8982944	8984415	KWMTBOMO00281	8920513	0.036006
Bomo_Chr1	8982944	8984415	KWMTBOMO00282	8950823	0.070387
Bomo_Chr1	8982944	8984415	KWMTBOMO00283	8967993	0.092024
Bomo_Chr1	9096716	9097612	KWMTBOMO00288	9094833	0.023197
Bomo_Chr1	9267699	9269498	KWMTBOMO00291	9262358	0.024233
Bomo_Chr1	9333819	9334554	KWMTBOMO00294	9341777	0.023157
Bomo_Chr1	9350320	9351234	KWMTBOMO00294	9341777	0.020372
Bomo_Chr1	9350320	9351234	KWMTBOMO00295	9359127	0.022674
Bomo_Chr1	9350320	9351234	KWMTBOMO00296	9369578	0.02339
Bomo_Chr1	9413582	9415190	KWMTBOMO00299	9419748	0.038309
Bomo_Chr1	9415298	9416328	KWMTBOMO00299	9419748	0.02266
Bomo_Chr1	9481062	9482285	KWMTBOMO00303	9484987	0.022797
Bomo_Chr1	9523744	9525008	KWMTBOMO00305	9527777	0.030459
Bomo_Chr1	9768875	9769859	KWMTBOMO00314	9763784	0.021615
Bomo_Chr1	9768875	9769859	KWMTBOMO00315	9765925	0.021615
Bomo_Chr1	9910921	9912059	KWMTBOMO00325	9910414	0.039931
Bomo_Chr1	9910921	9912059	KWMTBOMO00326	9919515	0.039933
Bomo_Chr1	9912283	9913046	KWMTBOMO00325	9910414	0.03304
Bomo_Chr1	9912283	9913046	KWMTBOMO00326	9919515	0.033041
Bomo_Chr1	9914721	9915221	KWMTBOMO00325	9910414	0.020159
Bomo_Chr1	9914721	9915221	KWMTBOMO00326	9919515	0.02016
Bomo_Chr1	10158410	10159565	KWMTBOMO00334	10191379	0.020634
Bomo_Chr1	10170848	10173041	KWMTBOMO00334	10191379	0.029896
Bomo_Chr1	10206583	10207676	KWMTBOMO00334	10191379	0.078267
Bomo_Chr1	10417857	10418844	KWMTBOMO00345	10415199	0.020066
Bomo_Chr1	10417857	10418844	KWMTBOMO00346	10419478	0.020069
Bomo_Chr1	10566942	10567722	KWMTBOMO00351	10566373	0.024778
Bomo_Chr1	10813444	10815475	KWMTBOMO00356	10806967	0.030881
Bomo_Chr1	10946809	10947757	KWMTBOMO00365	10925808	0.031335
Bomo_Chr1	10946809	10947757	KWMTBOMO00366	10965047	0.042769
Bomo_Chr1	10949873	10950582	KWMTBOMO00366	10965047	0.025339
Bomo_Chr1	10954411	10955518	KWMTBOMO00365	10925808	0.034071
Bomo_Chr1	10954411	10955518	KWMTBOMO00366	10965047	0.093671
Bomo_Chr1	10959349	10960067	KWMTBOMO00366	10965047	0.037178
Bomo_Chr1	10967703	10968995	KWMTBOMO00363	10901497	0.022403
Bomo_Chr1	10967703	10968995	KWMTBOMO00364	10903738	0.022405
Bomo_Chr1	10967703	10968995	KWMTBOMO00365	10925808	0.036292
Bomo_Chr1	10967703	10968995	KWMTBOMO00366	10965047	0.110009
Bomo_Chr1	10967703	10968995	KWMTBOMO00368	11063357	0.0243
Bomo_Chr1	10967703	10968995	KWMTBOMO00373	11094118	0.021508
Bomo_Chr1	11109350	11110292	KWMTBOMO00373	11094118	0.020337
Bomo_Chr1	11143778	11144446	KWMTBOMO00374	11142867	0.028351
Bomo_Chr1	11145422	11145922	KWMTBOMO00374	11142867	0.022996
Bomo_Chr1	11147520	11148483	KWMTBOMO00374	11142867	0.031036
Bomo_Chr1	11151431	11152546	KWMTBOMO00375	11156068	0.031506
Bomo_Chr1	11183995	11185274	KWMTBOMO00379	11253049	0.024021
Bomo_Chr1	11254549	11255478	KWMTBOMO00379	11253049	0.027148
Bomo_Chr1	11258313	11259028	KWMTBOMO00379	11253049	0.033616
Bomo_Chr1	11282315	11283017	KWMTBOMO00380	11280808	0.023424
Bomo_Chr1	11284167	11285369	KWMTBOMO00380	11280808	0.020626
Bomo_Chr1	11335479	11338480	KWMTBOMO00380	11280808	0.023973
Bomo_Chr1	11335479	11338480	KWMTBOMO00382	11360748	0.051426
Bomo_Chr1	11335479	11338480	KWMTBOMO00385	11393459	0.022216
Bomo_Chr1	11387246	11388029	KWMTBOMO00385	11393459	0.024415
Bomo_Chr1	11503232	11504183	KWMTBOMO00391	11509509	0.020545
Bomo_Chr1	11508204	11508828	KWMTBOMO00391	11509509	0.054158
Bomo_Chr1	11884750	11886271	KWMTBOMO00406	11897663	0.020647
Bomo_Chr1	12549328	12550038	KWMTBOMO00427	12558351	0.020456
Bomo_Chr1	12586634	12587145	KWMTBOMO00428	12584701	0.071768
Bomo_Chr1	12586634	12587145	KWMTBOMO00429	12584932	0.07177
Bomo_Chr1	12683734	12685361	KWMTBOMO00433	12680652	0.022111
Bomo_Chr1	12683734	12685361	KWMTBOMO00434	12682462	0.022113
Bomo_Chr1	12851817	12853567	KWMTBOMO00436	12884044	0.0292
Bomo_Chr1	12851817	12853567	KWMTBOMO00437	12885895	0.029201
Bomo_Chr1	12878342	12879568	KWMTBOMO00436	12884044	0.020912
Bomo_Chr1	12878342	12879568	KWMTBOMO00437	12885895	0.020913
Bomo_Chr1	12884549	12885372	KWMTBOMO00436	12884044	0.02249
Bomo_Chr1	12884549	12885372	KWMTBOMO00437	12885895	0.022491
Bomo_Chr1	12888228	12889103	KWMTBOMO00436	12884044	0.036361
Bomo_Chr1	12888228	12889103	KWMTBOMO00437	12885895	0.036362
Bomo_Chr1	13126164	13128042	KWMTBOMO00444	13101634	0.045949
Bomo_Chr1	13212081	13214163	KWMTBOMO00447	13224824	0.092248
Bomo_Chr1	13212081	13214163	KWMTBOMO00448	13233184	0.051622
Bomo_Chr1	13212081	13214163	KWMTBOMO00449	13250064	0.037624
Bomo_Chr1	13212081	13214163	KWMTBOMO00450	13252844	0.037629
Bomo_Chr1	13212081	13214163	KWMTBOMO00452	13261764	0.026534
Bomo_Chr1	13212081	13214163	KWMTBOMO00453	13267114	0.026532
Bomo_Chr1	13212081	13214163	KWMTBOMO00456	13293915	0.020607
Bomo_Chr1	13219665	13220596	KWMTBOMO00447	13224824	0.032599
Bomo_Chr1	13219665	13220596	KWMTBOMO00448	13233184	0.023198
Bomo_Chr1	13221331	13222118	KWMTBOMO00447	13224824	0.027743
Bomo_Chr1	13228664	13229474	KWMTBOMO00447	13224824	0.02937
Bomo_Chr1	13228664	13229474	KWMTBOMO00448	13233184	0.0209
Bomo_Chr1	13275151	13276530	KWMTBOMO00449	13250064	0.024697
Bomo_Chr1	13275151	13276530	KWMTBOMO00450	13252844	0.0247
Bomo_Chr1	13275151	13276530	KWMTBOMO00452	13261764	0.045114
Bomo_Chr1	13275151	13276530	KWMTBOMO00453	13267114	0.045109
Bomo_Chr1	13275151	13276530	KWMTBOMO00456	13293915	0.027124
Bomo_Chr1	13277212	13278281	KWMTBOMO00452	13261764	0.023311
Bomo_Chr1	13277212	13278281	KWMTBOMO00453	13267114	0.023309
Bomo_Chr1	13292183	13292814	KWMTBOMO00456	13293915	0.026668
Bomo_Chr1	13296354	13297120	KWMTBOMO00456	13293915	0.031226
Bomo_Chr1	13303996	13305441	KWMTBOMO00456	13293915	0.039068
Bomo_Chr1	13336316	13337204	KWMTBOMO00456	13293915	0.030862
Bomo_Chr1	13336316	13337204	KWMTBOMO00457	13310995	0.039344
Bomo_Chr1	13336316	13337204	KWMTBOMO00458	13393980	0.037788
Bomo_Chr1	13336316	13337204	KWMTBOMO00459	13415200	0.021274
Bomo_Chr1	13336316	13337204	KWMTBOMO00460	13418801	0.021278
Bomo_Chr1	13337550	13340374	KWMTBOMO00456	13293915	0.058647
Bomo_Chr1	13337550	13340374	KWMTBOMO00457	13310995	0.074764
Bomo_Chr1	13337550	13340374	KWMTBOMO00458	13393980	0.071808
Bomo_Chr1	13337550	13340374	KWMTBOMO00459	13415200	0.040427
Bomo_Chr1	13337550	13340374	KWMTBOMO00460	13418801	0.040434
Bomo_Chr1	13407706	13408246	KWMTBOMO00458	13393980	0.022883
Bomo_Chr1	13407706	13408246	KWMTBOMO00459	13415200	0.023002
Bomo_Chr1	13407706	13408246	KWMTBOMO00460	13418801	0.023006
Bomo_Chr1	13444427	13445129	KWMTBOMO00461	13448181	0.021025
Bomo_Chr1	13498051	13498954	KWMTBOMO00464	13485011	0.027469
Bomo_Chr1	13527723	13528265	KWMTBOMO00464	13485011	0.021212
Bomo_Chr1	13528606	13529704	KWMTBOMO00464	13485011	0.022366
Bomo_Chr1	13532480	13533650	KWMTBOMO00465	13557310	0.024702
Bomo_Chr1	13939488	13940666	KWMTBOMO00486	13930837	0.027658
Bomo_Chr1	13939488	13940666	KWMTBOMO00487	13932198	0.027658
Bomo_Chr1	13943610	13944941	KWMTBOMO00486	13930837	0.037871
Bomo_Chr1	13943610	13944941	KWMTBOMO00487	13932198	0.037872
Bomo_Chr1	13945683	13946682	KWMTBOMO00486	13930837	0.024805
Bomo_Chr1	13945683	13946682	KWMTBOMO00487	13932198	0.024806
Bomo_Chr1	14044276	14045082	KWMTBOMO00492	14054598	0.026849
Bomo_Chr1	14094597	14095425	KWMTBOMO00494	14091728	0.04787
Bomo_Chr1	14094597	14095425	KWMTBOMO00495	14106318	0.048357
Bomo_Chr1	14095480	14095980	KWMTBOMO00494	14091728	0.038932
Bomo_Chr1	14095480	14095980	KWMTBOMO00495	14106318	0.039328
Bomo_Chr1	14096122	14096622	KWMTBOMO00494	14091728	0.026817
Bomo_Chr1	14096122	14096622	KWMTBOMO00495	14106318	0.02709
Bomo_Chr1	14098265	14098984	KWMTBOMO00494	14091728	0.03827
Bomo_Chr1	14098265	14098984	KWMTBOMO00495	14106318	0.038659
Bomo_Chr1	14100745	14101782	KWMTBOMO00494	14091728	0.041377
Bomo_Chr1	14100745	14101782	KWMTBOMO00495	14106318	0.043195
Bomo_Chr1	14104776	14105276	KWMTBOMO00494	14091728	0.021544
Bomo_Chr1	14104776	14105276	KWMTBOMO00495	14106318	0.02249
Bomo_Chr1	14165299	14166591	KWMTBOMO00492	14054598	0.020028
Bomo_Chr1	14165299	14166591	KWMTBOMO00497	14245112	0.023316
Bomo_Chr1	14250112	14250810	KWMTBOMO00497	14245112	0.020139
Bomo_Chr1	14253135	14254048	KWMTBOMO00497	14245112	0.036211
Bomo_Chr1	14329313	14330848	KWMTBOMO00501	14337752	0.032089
Bomo_Chr1	14347100	14347773	KWMTBOMO00501	14337752	0.025516
Bomo_Chr1	14355862	14356810	KWMTBOMO00501	14337752	0.022711
Bomo_Chr1	14365757	14367069	KWMTBOMO00501	14337752	0.021893
Bomo_Chr1	14952582	14953372	KWMTBOMO00514	14954797	0.020562
Bomo_Chr1	15044647	15045837	KWMTBOMO00514	14954797	0.041899
Bomo_Chr1	15044647	15045837	KWMTBOMO00516	15122189	0.03203
Bomo_Chr1	15044647	15045837	KWMTBOMO00520	15200490	0.021989
Bomo_Chr1	15046112	15046612	KWMTBOMO00514	14954797	0.021193
Bomo_Chr1	15046828	15048646	KWMTBOMO00514	14954797	0.053828
Bomo_Chr1	15046828	15048646	KWMTBOMO00516	15122189	0.041149
Bomo_Chr1	15046828	15048646	KWMTBOMO00520	15200490	0.028249
Bomo_Chr1	15046828	15048646	KWMTBOMO00521	15248399	0.023103
Bomo_Chr1	15048735	15049614	KWMTBOMO00514	14954797	0.042863
Bomo_Chr1	15048735	15049614	KWMTBOMO00516	15122189	0.032767
Bomo_Chr1	15048735	15049614	KWMTBOMO00520	15200490	0.022495
Bomo_Chr1	15094007	15095998	KWMTBOMO00516	15122189	0.04962
Bomo_Chr1	15094007	15095998	KWMTBOMO00520	15200490	0.027893
Bomo_Chr1	15112022	15113758	KWMTBOMO00516	15122189	0.029308
Bomo_Chr1	15171189	15172347	KWMTBOMO00516	15122189	0.020407
Bomo_Chr1	15171189	15172347	KWMTBOMO00520	15200490	0.043103
Bomo_Chr1	15171189	15172347	KWMTBOMO00521	15248399	0.024771
Bomo_Chr1	15197710	15199022	KWMTBOMO00520	15200490	0.067743
Bomo_Chr1	15197710	15199022	KWMTBOMO00521	15248399	0.020729
Bomo_Chr1	15249633	15250209	KWMTBOMO00521	15248399	0.026206
Bomo_Chr1	15250397	15251454	KWMTBOMO00521	15248399	0.030374
Bomo_Chr1	15251512	15253119	KWMTBOMO00521	15248399	0.049555
Bomo_Chr1	15451375	15451875	KWMTBOMO00530	15460709	0.024068
Bomo_Chr1	15452163	15452663	KWMTBOMO00530	15460709	0.022405
Bomo_Chr1	15452689	15453189	KWMTBOMO00530	15460709	0.031645
Bomo_Chr1	15453932	15454432	KWMTBOMO00530	15460709	0.025371
Bomo_Chr1	15455523	15456023	KWMTBOMO00530	15460709	0.025765
Bomo_Chr1	15466155	15467062	KWMTBOMO00530	15460709	0.032104
Bomo_Chr1	15467222	15467940	KWMTBOMO00530	15460709	0.03087
Bomo_Chr1	15511391	15513959	KWMTBOMO00530	15460709	0.028334
Bomo_Chr1	15619139	15620090	KWMTBOMO00534	15615345	0.078372
Bomo_Chr1	15620173	15620673	KWMTBOMO00534	15615345	0.026256
Bomo_Chr1	15841379	15842638	KWMTBOMO00539	15852546	0.032645
Bomo_Chr1	15844482	15845630	KWMTBOMO00539	15852546	0.029283
Bomo_Chr1	15848378	15849025	KWMTBOMO00539	15852546	0.022299
Bomo_Chr1	15861493	15862729	KWMTBOMO00539	15852546	0.061826
Bomo_Chr1	15866202	15867074	KWMTBOMO00539	15852546	0.041048
Bomo_Chr1	16046786	16047690	KWMTBOMO00542	16045600	0.021868
Bomo_Chr1	16074386	16074898	KWMTBOMO00543	16069510	0.026831
Bomo_Chr1	16113552	16114185	KWMTBOMO00545	16116700	0.030389
Bomo_Chr1	16114495	16114995	KWMTBOMO00545	16116700	0.027788
Bomo_Chr1	16123523	16124083	KWMTBOMO00545	16116700	0.026317
Bomo_Chr1	16298075	16298650	KWMTBOMO00548	16295639	0.020589
Bomo_Chr1	16298075	16298650	KWMTBOMO00549	16308549	0.020737
Bomo_Chr1	16309394	16309894	KWMTBOMO00548	16295639	0.025665
Bomo_Chr1	16309394	16309894	KWMTBOMO00549	16308549	0.02585
Bomo_Chr1	16309394	16309894	KWMTBOMO00550	16312000	0.02099
Bomo_Chr1	16345583	16346408	KWMTBOMO00551	16355729	0.021556
Bomo_Chr1	16356412	16357455	KWMTBOMO00551	16355729	0.023389
Bomo_Chr1	16383319	16384384	KWMTBOMO00551	16355729	0.0236
Bomo_Chr1	16383319	16384384	KWMTBOMO00552	16398129	0.063718
Bomo_Chr1	16389861	16390846	KWMTBOMO00552	16398129	0.027695
Bomo_Chr1	16391422	16392242	KWMTBOMO00552	16398129	0.026626
Bomo_Chr1	16393656	16394156	KWMTBOMO00552	16398129	0.023359
Bomo_Chr1	16395957	16396606	KWMTBOMO00552	16398129	0.028826
Bomo_Chr1	16407504	16408330	KWMTBOMO00552	16398129	0.025676
Bomo_Chr1	16463762	16464612	KWMTBOMO00556	16478369	0.023131
Bomo_Chr1	16482045	16482935	KWMTBOMO00556	16478369	0.036074
Bomo_Chr1	16489213	16490173	KWMTBOMO00556	16478369	0.039987
Bomo_Chr1	16576688	16577980	KWMTBOMO00560	16584998	0.052569
Bomo_Chr1	16582157	16583530	KWMTBOMO00560	16584998	0.038471
Bomo_Chr1	16597130	16598947	KWMTBOMO00560	16584998	0.052938
Bomo_Chr1	16818566	16819333	KWMTBOMO00567	16825178	0.029999
Bomo_Chr1	16818566	16819333	KWMTBOMO00568	16826959	0.030001
Bomo_Chr1	16835758	16836648	KWMTBOMO00567	16825178	0.080962
Bomo_Chr1	16835758	16836648	KWMTBOMO00568	16826959	0.080966
Bomo_Chr1	16840734	16842006	KWMTBOMO00567	16825178	0.038627
Bomo_Chr1	16840734	16842006	KWMTBOMO00568	16826959	0.038629
Bomo_Chr1	16903016	16903516	KWMTBOMO00570	16908684	0.02638
Bomo_Chr1	16903680	16904180	KWMTBOMO00570	16908684	0.031371
Bomo_Chr1	16904442	16905238	KWMTBOMO00569	16896248	0.021151
Bomo_Chr1	16904442	16905238	KWMTBOMO00570	16908684	0.037719
Bomo_Chr1	16912133	16912871	KWMTBOMO00570	16908684	0.020586
Bomo_Chr1	16913437	16914202	KWMTBOMO00570	16908684	0.021499
Bomo_Chr1	16926610	16928076	KWMTBOMO00570	16908684	0.027093
Bomo_Chr1	17309719	17310653	KWMTBOMO00580	17328363	0.027764
Bomo_Chr1	17321898	17322812	KWMTBOMO00580	17328363	0.03703
Bomo_Chr1	17339041	17339896	KWMTBOMO00580	17328363	0.0322
Bomo_Chr1	17400245	17400984	KWMTBOMO00582	17389322	0.039655
Bomo_Chr1	17400245	17400984	KWMTBOMO00584	17408873	0.087211
Bomo_Chr1	17401078	17401867	KWMTBOMO00582	17389322	0.026029
Bomo_Chr1	17401078	17401867	KWMTBOMO00584	17408873	0.057244
Bomo_Chr1	17403683	17404183	KWMTBOMO00584	17408873	0.026838
Bomo_Chr1	17404679	17405477	KWMTBOMO00582	17389322	0.024579
Bomo_Chr1	17404679	17405477	KWMTBOMO00584	17408873	0.054056
Bomo_Chr1	17405580	17406080	KWMTBOMO00584	17408873	0.027204
Bomo_Chr1	17407437	17407937	KWMTBOMO00584	17408873	0.026632
Bomo_Chr1	17426111	17426829	KWMTBOMO00584	17408873	0.021934
Bomo_Chr1	17878924	17879857	KWMTBOMO00591	17941875	0.058385
Bomo_Chr1	17878924	17879857	KWMTBOMO00598	18149436	0.035341
Bomo_Chr1	17878924	17879857	KWMTBOMO00607	18476379	0.020232
Bomo_Chr1	17878924	17879857	KWMTBOMO00611	18744239	0.027055
Bomo_Chr1	17878924	17879857	KWMTBOMO00630	19526971	0.040974
Bomo_Chr1	17959449	17959949	KWMTBOMO00591	17941875	0.024782
Bomo_Chr1	18258496	18258996	KWMTBOMO00601	18264589	0.069725
Bomo_Chr1	18259053	18259583	KWMTBOMO00601	18264589	0.075587
Bomo_Chr1	18259053	18259583	KWMTBOMO00604	18288350	0.02069
Bomo_Chr1	18260868	18261370	KWMTBOMO00601	18264589	0.145198
Bomo_Chr1	18260868	18261370	KWMTBOMO00604	18288350	0.048291
Bomo_Chr1	18263377	18263877	KWMTBOMO00601	18264589	0.094973
Bomo_Chr1	18263377	18263877	KWMTBOMO00604	18288350	0.031587
Bomo_Chr1	18268253	18268753	KWMTBOMO00601	18264589	0.047985
Bomo_Chr1	18303855	18305669	KWMTBOMO00604	18288350	0.05099
Bomo_Chr1	18303855	18305669	KWMTBOMO00607	18476379	0.022172
Bomo_Chr1	18460049	18460628	KWMTBOMO00607	18476379	0.02713
Bomo_Chr1	18465479	18466432	KWMTBOMO00607	18476379	0.020879
Bomo_Chr1	18466658	18467574	KWMTBOMO00607	18476379	0.039337
Bomo_Chr1	18660805	18662773	KWMTBOMO00609	18678059	0.105643
Bomo_Chr1	18660805	18662773	KWMTBOMO00611	18744239	0.027593
Bomo_Chr1	18664927	18665718	KWMTBOMO00609	18678059	0.043181
Bomo_Chr1	18675139	18675639	KWMTBOMO00609	18678059	0.032078
Bomo_Chr1	18675946	18676446	KWMTBOMO00609	18678059	0.056332
Bomo_Chr1	18682357	18683009	KWMTBOMO00609	18678059	0.020376
Bomo_Chr1	18686373	18687278	KWMTBOMO00609	18678059	0.042951
Bomo_Chr1	18746059	18746796	KWMTBOMO00611	18744239	0.062568
Bomo_Chr1	18747487	18748431	KWMTBOMO00611	18744239	0.056099
Bomo_Chr1	18748937	18749437	KWMTBOMO00611	18744239	0.032604
Bomo_Chr1	19354602	19355880	KWMTBOMO00611	18744239	0.026738
Bomo_Chr1	19354602	19355880	KWMTBOMO00623	19402819	0.033469
Bomo_Chr1	19354602	19355880	KWMTBOMO00625	19440070	0.02023
Bomo_Chr1	19354602	19355880	KWMTBOMO00627	19444751	0.020233
Bomo_Chr1	19392165	19393347	KWMTBOMO00623	19402819	0.10392
Bomo_Chr1	19392165	19393347	KWMTBOMO00625	19440070	0.0344
Bomo_Chr1	19392165	19393347	KWMTBOMO00627	19444751	0.034404
Bomo_Chr1	19394169	19395052	KWMTBOMO00623	19402819	0.028937
Bomo_Chr1	19400911	19401717	KWMTBOMO00623	19402819	0.055241
Bomo_Chr1	19406937	19407758	KWMTBOMO00623	19402819	0.032862
Bomo_Chr1	19435241	19436461	KWMTBOMO00625	19440070	0.034061
Bomo_Chr1	19435241	19436461	KWMTBOMO00627	19444751	0.034064
Bomo_Chr1	19436497	19437942	KWMTBOMO00625	19440070	0.050219
Bomo_Chr1	19436497	19437942	KWMTBOMO00627	19444751	0.050225
Bomo_Chr1	19448572	19450137	KWMTBOMO00623	19402819	0.026886
Bomo_Chr1	19448572	19450137	KWMTBOMO00625	19440070	0.075985
Bomo_Chr1	19448572	19450137	KWMTBOMO00627	19444751	0.075994
Bomo_Chr1	19453479	19454163	KWMTBOMO00625	19440070	0.023369
Bomo_Chr1	19453479	19454163	KWMTBOMO00627	19444751	0.023372
Bomo_Chr1	19546631	19547424	KWMTBOMO00630	19526971	0.024322
Bomo_Chr1	19680473	19683037	KWMTBOMO00630	19526971	0.027507
Bomo_Chr1	19680473	19683037	KWMTBOMO00634	19684800	0.217296
Bomo_Chr1	19680473	19683037	KWMTBOMO00635	19689070	0.217418
Bomo_Chr1	19680473	19683037	KWMTBOMO00639	19789034	0.03409
Bomo_Chr1	19685586	19686414	KWMTBOMO00634	19684800	0.076764
Bomo_Chr1	19685586	19686414	KWMTBOMO00635	19689070	0.076808
Bomo_Chr1	19686427	19686927	KWMTBOMO00634	19684800	0.047319
Bomo_Chr1	19686427	19686927	KWMTBOMO00635	19689070	0.047345
Bomo_Chr1	19828286	19830503	KWMTBOMO00639	19789034	0.023006
Bomo_Chr1	19962653	19965179	KWMTBOMO00643	20002724	0.026884
Bomo_Chr1	20153721	20155247	KWMTBOMO00652	20164404	0.076396
Bomo_Chr1	20226111	20226687	KWMTBOMO00652	20164404	0.020184
Bomo_Chr1	20231416	20232145	KWMTBOMO00653	20269654	0.026005
Bomo_Chr1	20232572	20233484	KWMTBOMO00653	20269654	0.022177
Bomo_Chr1	20264114	20264614	KWMTBOMO00653	20269654	0.020066
Bomo_Chr1	20270874	20271759	KWMTBOMO00653	20269654	0.042657
Bomo_Chr1	20278003	20278503	KWMTBOMO00653	20269654	0.023309
Bomo_Chr1	20279190	20280043	KWMTBOMO00653	20269654	0.022371
Bomo_Chr1	20289763	20290426	KWMTBOMO00653	20269654	0.024865
Bomo_Chr1	20351683	20352427	KWMTBOMO00658	20380903	0.029469
Bomo_Chr1	20363224	20364456	KWMTBOMO00658	20380903	0.049489
Bomo_Chr1	20369974	20370928	KWMTBOMO00658	20380903	0.03636
Bomo_Chr1	20371200	20372013	KWMTBOMO00658	20380903	0.044657
Bomo_Chr1	20374057	20374917	KWMTBOMO00658	20380903	0.044335
Bomo_Chr1	20376209	20377252	KWMTBOMO00658	20380903	0.042439
Bomo_Chr1	20394933	20396264	KWMTBOMO00658	20380903	0.033258
Bomo_Chr1	20420721	20421910	KWMTBOMO00658	20380903	0.040687
Bomo_Chr1	20438355	20440167	KWMTBOMO00658	20380903	0.022802
Bomo_Chr1	20446737	20448435	KWMTBOMO00658	20380903	0.033632
Bomo_Chr1	20446737	20448435	KWMTBOMO00661	20528583	0.022395
Bomo_Chr1	20446737	20448435	KWMTBOMO00663	20549434	0.020896
Bomo_Chr1	20493272	20494699	KWMTBOMO00661	20528583	0.021698
Bomo_Chr1	20513298	20513798	KWMTBOMO00661	20528583	0.021115
Bomo_Chr1	20515766	20516266	KWMTBOMO00661	20528583	0.026085
Bomo_Chr1	20516555	20517205	KWMTBOMO00661	20528583	0.040901
Bomo_Chr1	20517361	20517861	KWMTBOMO00661	20528583	0.020624
Bomo_Chr1	20524350	20524850	KWMTBOMO00661	20528583	0.02359
Bomo_Chr1	20525051	20525581	KWMTBOMO00661	20528583	0.026176
Bomo_Chr1	20535751	20536584	KWMTBOMO00661	20528583	0.069599
Bomo_Chr1	20535751	20536584	KWMTBOMO00663	20549434	0.113134
Bomo_Chr1	20547009	20547509	KWMTBOMO00663	20549434	0.027779
Bomo_Chr1	20548112	20548612	KWMTBOMO00663	20549434	0.032082
Bomo_Chr1	20550941	20551598	KWMTBOMO00663	20549434	0.04336
Bomo_Chr10	24873	25708	KWMTBOMO05391	21395	0.026675
Bomo_Chr10	24873	25708	KWMTBOMO05392	23566	0.026671
Bomo_Chr10	28527	29202	KWMTBOMO05391	21395	0.027795
Bomo_Chr10	28527	29202	KWMTBOMO05392	23566	0.02779
Bomo_Chr10	36503	37820	KWMTBOMO05393	34205	0.031472
Bomo_Chr10	55470	56403	KWMTBOMO05394	67635	0.022849
Bomo_Chr10	61766	62686	KWMTBOMO05394	67635	0.021186
Bomo_Chr10	77589	78399	KWMTBOMO05394	67635	0.022162
Bomo_Chr10	81918	83894	KWMTBOMO05394	67635	0.026541
Bomo_Chr10	136227	137454	KWMTBOMO05394	67635	0.02213
Bomo_Chr10	468441	469962	KWMTBOMO05399	524726	0.02126
Bomo_Chr10	492381	493502	KWMTBOMO05399	524726	0.022439
Bomo_Chr10	493637	494434	KWMTBOMO05399	524726	0.023526
Bomo_Chr10	553945	555017	KWMTBOMO05400	546005	0.03052
Bomo_Chr10	553945	555017	KWMTBOMO05401	549406	0.030508
Bomo_Chr10	553945	555017	KWMTBOMO05402	567985	0.020981
Bomo_Chr10	572110	574128	KWMTBOMO05402	567985	0.036294
Bomo_Chr10	577955	579066	KWMTBOMO05402	567985	0.031344
Bomo_Chr10	588472	589467	KWMTBOMO05402	567985	0.020657
Bomo_Chr10	588472	589467	KWMTBOMO05403	596916	0.024241
Bomo_Chr10	589750	590547	KWMTBOMO05403	596916	0.033407
Bomo_Chr10	591321	591821	KWMTBOMO05403	596916	0.020752
Bomo_Chr10	594581	595090	KWMTBOMO05403	596916	0.021276
Bomo_Chr10	607485	608299	KWMTBOMO05403	596916	0.026133
Bomo_Chr10	608424	609348	KWMTBOMO05403	596916	0.026436
Bomo_Chr10	618681	620940	KWMTBOMO05403	596916	0.024373
Bomo_Chr10	786652	787593	KWMTBOMO05396	249475	0.021257
Bomo_Chr10	1391936	1393081	KWMTBOMO05412	1386280	0.028545
Bomo_Chr10	1391936	1393081	KWMTBOMO05413	1397291	0.050044
Bomo_Chr10	1391936	1393081	KWMTBOMO05414	1406781	0.028427
Bomo_Chr10	1394131	1395105	KWMTBOMO05412	1386280	0.031217
Bomo_Chr10	1394131	1395105	KWMTBOMO05413	1397291	0.054727
Bomo_Chr10	1394131	1395105	KWMTBOMO05414	1406781	0.031087
Bomo_Chr10	1400863	1401587	KWMTBOMO05414	1406781	0.022261
Bomo_Chr10	1401783	1402622	KWMTBOMO05414	1406781	0.031929
Bomo_Chr10	1413732	1414385	KWMTBOMO05412	1386280	0.020025
Bomo_Chr10	1413732	1414385	KWMTBOMO05413	1397291	0.026764
Bomo_Chr10	1413732	1414385	KWMTBOMO05414	1406781	0.032096
Bomo_Chr10	1432184	1433567	KWMTBOMO05411	1372571	0.034932
Bomo_Chr10	1432184	1433567	KWMTBOMO05412	1386280	0.040671
Bomo_Chr10	1432184	1433567	KWMTBOMO05413	1397291	0.036686
Bomo_Chr10	1432184	1433567	KWMTBOMO05414	1406781	0.030743
Bomo_Chr10	1529861	1530734	KWMTBOMO05415	1540830	0.020233
Bomo_Chr10	1529861	1530734	KWMTBOMO05416	1542131	0.020231
Bomo_Chr10	1565220	1566871	KWMTBOMO05415	1540830	0.025275
Bomo_Chr10	1565220	1566871	KWMTBOMO05416	1542131	0.025273
Bomo_Chr10	1565220	1566871	KWMTBOMO05418	1563840	0.041466
Bomo_Chr10	1567684	1568634	KWMTBOMO05415	1540830	0.020839
Bomo_Chr10	1567684	1568634	KWMTBOMO05416	1542131	0.020837
Bomo_Chr10	1567684	1568634	KWMTBOMO05418	1563840	0.034188
Bomo_Chr10	1823258	1824109	KWMTBOMO05425	1801925	0.023929
Bomo_Chr10	1823258	1824109	KWMTBOMO05426	1805575	0.023922
Bomo_Chr10	1823258	1824109	KWMTBOMO05427	1805786	0.023922
Bomo_Chr10	1846417	1848011	KWMTBOMO05425	1801925	0.034805
Bomo_Chr10	1846417	1848011	KWMTBOMO05426	1805575	0.034795
Bomo_Chr10	1846417	1848011	KWMTBOMO05427	1805786	0.034795
Bomo_Chr10	1849946	1851116	KWMTBOMO05425	1801925	0.035667
Bomo_Chr10	1849946	1851116	KWMTBOMO05426	1805575	0.035657
Bomo_Chr10	1849946	1851116	KWMTBOMO05427	1805786	0.035657
Bomo_Chr10	2015738	2016442	KWMTBOMO05431	2014215	0.033286
Bomo_Chr10	2019192	2020451	KWMTBOMO05431	2014215	0.066595
Bomo_Chr10	2019192	2020451	KWMTBOMO05432	2067356	0.021911
Bomo_Chr10	2022888	2023388	KWMTBOMO05431	2014215	0.041268
Bomo_Chr10	2024421	2024921	KWMTBOMO05431	2014215	0.021531
Bomo_Chr10	2027308	2028198	KWMTBOMO05431	2014215	0.04224
Bomo_Chr10	2028220	2028720	KWMTBOMO05431	2014215	0.022701
Bomo_Chr10	2049635	2051002	KWMTBOMO05432	2067356	0.025853
Bomo_Chr10	2052822	2053994	KWMTBOMO05432	2067356	0.024749
Bomo_Chr10	2060907	2061845	KWMTBOMO05432	2067356	0.050942
Bomo_Chr10	2126994	2128113	KWMTBOMO05433	2128973	0.020136
Bomo_Chr10	2200885	2202384	KWMTBOMO05435	2206073	0.111171
Bomo_Chr10	2200885	2202384	KWMTBOMO05436	2262812	0.041433
Bomo_Chr10	2200885	2202384	KWMTBOMO05437	2269133	0.041423
Bomo_Chr10	2213181	2214054	KWMTBOMO05435	2206073	0.030127
Bomo_Chr10	2244883	2246115	KWMTBOMO05436	2262812	0.025263
Bomo_Chr10	2244883	2246115	KWMTBOMO05437	2269133	0.025258
Bomo_Chr10	2267557	2268057	KWMTBOMO05436	2262812	0.02139
Bomo_Chr10	2267557	2268057	KWMTBOMO05437	2269133	0.021385
Bomo_Chr10	2340331	2341297	KWMTBOMO05439	2343733	0.021617
Bomo_Chr10	2349852	2350744	KWMTBOMO05439	2343733	0.022117
Bomo_Chr10	2349852	2350744	KWMTBOMO05440	2359583	0.029291
Bomo_Chr10	2361447	2362154	KWMTBOMO05440	2359583	0.029496
Bomo_Chr10	2361447	2362154	KWMTBOMO05441	2377373	0.035153
Bomo_Chr10	2363672	2364398	KWMTBOMO05440	2359583	0.024246
Bomo_Chr10	2363672	2364398	KWMTBOMO05441	2377373	0.028896
Bomo_Chr10	2365278	2365927	KWMTBOMO05440	2359583	0.027402
Bomo_Chr10	2365278	2365927	KWMTBOMO05441	2377373	0.032657
Bomo_Chr10	2366422	2366922	KWMTBOMO05441	2377373	0.022956
Bomo_Chr10	2460685	2461580	KWMTBOMO05447	2469963	0.024971
Bomo_Chr10	2489145	2489787	KWMTBOMO05448	2480854	0.026568
Bomo_Chr10	2585053	2586229	KWMTBOMO05456	2593734	0.022982
Bomo_Chr10	2603846	2604922	KWMTBOMO05456	2593734	0.028507
Bomo_Chr10	2810842	2812669	KWMTBOMO05391	21395	0.0266
Bomo_Chr10	2810842	2812669	KWMTBOMO05392	23566	0.026596
Bomo_Chr10	2810842	2812669	KWMTBOMO05461	2833714	0.042841
Bomo_Chr10	2810842	2812669	KWMTBOMO05462	2835525	0.042838
Bomo_Chr10	2810842	2812669	KWMTBOMO05463	2838475	0.042834
Bomo_Chr10	2810842	2812669	KWMTBOMO05464	2843395	0.026812
Bomo_Chr10	2822197	2824300	KWMTBOMO05461	2833714	0.069371
Bomo_Chr10	2822197	2824300	KWMTBOMO05462	2835525	0.069366
Bomo_Chr10	2822197	2824300	KWMTBOMO05463	2838475	0.069359
Bomo_Chr10	2822197	2824300	KWMTBOMO05464	2843395	0.031923
Bomo_Chr10	2844245	2844950	KWMTBOMO05461	2833714	0.026521
Bomo_Chr10	2844245	2844950	KWMTBOMO05462	2835525	0.026519
Bomo_Chr10	2844245	2844950	KWMTBOMO05463	2838475	0.026516
Bomo_Chr10	2844245	2844950	KWMTBOMO05464	2843395	0.026818
Bomo_Chr10	2845833	2847190	KWMTBOMO05461	2833714	0.029392
Bomo_Chr10	2845833	2847190	KWMTBOMO05462	2835525	0.02939
Bomo_Chr10	2845833	2847190	KWMTBOMO05463	2838475	0.029387
Bomo_Chr10	2845833	2847190	KWMTBOMO05464	2843395	0.029722
Bomo_Chr10	2917605	2918298	KWMTBOMO05465	2915844	0.040359
Bomo_Chr10	2917605	2918298	KWMTBOMO05466	2956140	0.024409
Bomo_Chr10	2917605	2918298	KWMTBOMO05467	2957311	0.024408
Bomo_Chr10	2919698	2920198	KWMTBOMO05465	2915844	0.032402
Bomo_Chr10	2920539	2921368	KWMTBOMO05465	2915844	0.044555
Bomo_Chr10	2920539	2921368	KWMTBOMO05466	2956140	0.02634
Bomo_Chr10	2920539	2921368	KWMTBOMO05467	2957311	0.026339
Bomo_Chr10	2922033	2922968	KWMTBOMO05465	2915844	0.041526
Bomo_Chr10	2922033	2922968	KWMTBOMO05466	2956140	0.024549
Bomo_Chr10	2922033	2922968	KWMTBOMO05467	2957311	0.024549
Bomo_Chr10	2924397	2924897	KWMTBOMO05465	2915844	0.024859
Bomo_Chr10	2926056	2926556	KWMTBOMO05465	2915844	0.020572
Bomo_Chr10	2929868	2930368	KWMTBOMO05465	2915844	0.023466
Bomo_Chr10	2929868	2930368	KWMTBOMO05466	2956140	0.023216
Bomo_Chr10	2929868	2930368	KWMTBOMO05467	2957311	0.023215
Bomo_Chr10	2930907	2932076	KWMTBOMO05465	2915844	0.037077
Bomo_Chr10	2930907	2932076	KWMTBOMO05466	2956140	0.036682
Bomo_Chr10	2930907	2932076	KWMTBOMO05467	2957311	0.036681
Bomo_Chr10	2932952	2934459	KWMTBOMO05465	2915844	0.056801
Bomo_Chr10	2932952	2934459	KWMTBOMO05466	2956140	0.056195
Bomo_Chr10	2932952	2934459	KWMTBOMO05467	2957311	0.056194
Bomo_Chr10	2932952	2934459	KWMTBOMO05469	2971790	0.029578
Bomo_Chr10	2932952	2934459	KWMTBOMO05470	2972821	0.029577
Bomo_Chr10	2932952	2934459	KWMTBOMO05471	2985161	0.023979
Bomo_Chr10	2939317	2941379	KWMTBOMO05465	2915844	0.050555
Bomo_Chr10	2939317	2941379	KWMTBOMO05466	2956140	0.058821
Bomo_Chr10	2939317	2941379	KWMTBOMO05467	2957311	0.058819
Bomo_Chr10	2939317	2941379	KWMTBOMO05469	2971790	0.029964
Bomo_Chr10	2939317	2941379	KWMTBOMO05470	2972821	0.029963
Bomo_Chr10	2939317	2941379	KWMTBOMO05471	2985161	0.021873
Bomo_Chr10	2939317	2941379	KWMTBOMO05472	2992380	0.021077
Bomo_Chr10	2941651	2942535	KWMTBOMO05465	2915844	0.026398
Bomo_Chr10	2941651	2942535	KWMTBOMO05466	2956140	0.030713
Bomo_Chr10	2941651	2942535	KWMTBOMO05467	2957311	0.030713
Bomo_Chr10	2949672	2951122	KWMTBOMO05465	2915844	0.030883
Bomo_Chr10	2949672	2951122	KWMTBOMO05466	2956140	0.056621
Bomo_Chr10	2949672	2951122	KWMTBOMO05467	2957311	0.05662
Bomo_Chr10	2949672	2951122	KWMTBOMO05469	2971790	0.043154
Bomo_Chr10	2949672	2951122	KWMTBOMO05470	2972821	0.043153
Bomo_Chr10	2949672	2951122	KWMTBOMO05471	2985161	0.029463
Bomo_Chr10	2949672	2951122	KWMTBOMO05472	2992380	0.022575
Bomo_Chr10	3097758	3098441	KWMTBOMO05480	3094620	0.027212
Bomo_Chr10	3097758	3098441	KWMTBOMO05481	3096880	0.027211
Bomo_Chr10	3097758	3098441	KWMTBOMO05482	3099091	0.02721
Bomo_Chr10	3118726	3119226	KWMTBOMO05483	3112900	0.020242
Bomo_Chr10	3118726	3119226	KWMTBOMO05484	3113671	0.020241
Bomo_Chr10	3119250	3120492	KWMTBOMO05480	3094620	0.025949
Bomo_Chr10	3119250	3120492	KWMTBOMO05481	3096880	0.025948
Bomo_Chr10	3119250	3120492	KWMTBOMO05482	3099091	0.025946
Bomo_Chr10	3119250	3120492	KWMTBOMO05483	3112900	0.044704
Bomo_Chr10	3119250	3120492	KWMTBOMO05484	3113671	0.044703
Bomo_Chr10	3595155	3597290	KWMTBOMO05499	3607356	0.0298
Bomo_Chr10	3643592	3645267	KWMTBOMO05501	3638346	0.024974
Bomo_Chr10	3643592	3645267	KWMTBOMO05502	3647717	0.025406
Bomo_Chr10	3658587	3659476	KWMTBOMO05499	3607356	0.024378
Bomo_Chr10	3658587	3659476	KWMTBOMO05500	3614517	0.030269
Bomo_Chr10	3658587	3659476	KWMTBOMO05501	3638346	0.043902
Bomo_Chr10	3658587	3659476	KWMTBOMO05502	3647717	0.060255
Bomo_Chr10	3659659	3660159	KWMTBOMO05502	3647717	0.021092
Bomo_Chr10	3709990	3710868	KWMTBOMO05503	3737182	0.023424
Bomo_Chr10	3738884	3740437	KWMTBOMO05503	3737182	0.054024
Bomo_Chr10	3738884	3740437	KWMTBOMO05504	3743983	0.036931
Bomo_Chr10	3861382	3862532	KWMTBOMO05508	3866192	0.028578
Bomo_Chr10	3861382	3862532	KWMTBOMO05509	3867033	0.028578
Bomo_Chr10	3861382	3862532	KWMTBOMO05510	3873153	0.027083
Bomo_Chr10	3875803	3877031	KWMTBOMO05508	3866192	0.02268
Bomo_Chr10	3875803	3877031	KWMTBOMO05509	3867033	0.02268
Bomo_Chr10	3875803	3877031	KWMTBOMO05510	3873153	0.021493
Bomo_Chr10	3885468	3886703	KWMTBOMO05508	3866192	0.027459
Bomo_Chr10	3885468	3886703	KWMTBOMO05509	3867033	0.027459
Bomo_Chr10	3885468	3886703	KWMTBOMO05510	3873153	0.038426
Bomo_Chr10	3885468	3886703	KWMTBOMO05511	3883982	0.043279
Bomo_Chr10	3885468	3886703	KWMTBOMO05512	3888343	0.043279
Bomo_Chr10	4021224	4022450	KWMTBOMO05513	4007392	0.022682
Bomo_Chr10	4021224	4022450	KWMTBOMO05514	4009753	0.022681
Bomo_Chr10	4021224	4022450	KWMTBOMO05515	4016223	0.046054
Bomo_Chr10	4050586	4052221	KWMTBOMO05516	4060492	0.046124
Bomo_Chr10	4050586	4052221	KWMTBOMO05517	4093693	0.021901
Bomo_Chr10	4057993	4058880	KWMTBOMO05516	4060492	0.044475
Bomo_Chr10	4057993	4058880	KWMTBOMO05517	4093693	0.021118
Bomo_Chr10	4143169	4143669	KWMTBOMO05521	4130063	0.029976
Bomo_Chr10	4143169	4143669	KWMTBOMO05522	4149512	0.030758
Bomo_Chr10	4221033	4222264	KWMTBOMO05524	4224618	0.028502
Bomo_Chr10	4221033	4222264	KWMTBOMO05525	4228337	0.028501
Bomo_Chr10	4271448	4272267	KWMTBOMO05527	4275258	0.039501
Bomo_Chr10	4271448	4272267	KWMTBOMO05528	4280107	0.020872
Bomo_Chr10	4280684	4281383	KWMTBOMO05528	4280107	0.022256
Bomo_Chr10	4285407	4287695	KWMTBOMO05526	4263677	0.020458
Bomo_Chr10	4285407	4287695	KWMTBOMO05527	4275258	0.036149
Bomo_Chr10	4285407	4287695	KWMTBOMO05528	4280107	0.061509
Bomo_Chr10	4285407	4287695	KWMTBOMO05530	4297958	0.033794
Bomo_Chr10	4295755	4296255	KWMTBOMO05528	4280107	0.020547
Bomo_Chr10	4295755	4296255	KWMTBOMO05530	4297958	0.026142
Bomo_Chr10	4295755	4296255	KWMTBOMO05531	4308637	0.025807
Bomo_Chr10	4309923	4310727	KWMTBOMO05531	4308637	0.020664
Bomo_Chr10	4309923	4310727	KWMTBOMO05532	4311458	0.022296
Bomo_Chr10	4317827	4319013	KWMTBOMO05531	4308637	0.022374
Bomo_Chr10	4317827	4319013	KWMTBOMO05532	4311458	0.024141
Bomo_Chr10	4322260	4323584	KWMTBOMO05533	4328708	0.029022
Bomo_Chr10	4380194	4382190	KWMTBOMO05507	3842613	0.02148
Bomo_Chr10	4380194	4382190	KWMTBOMO05510	3873153	0.023601
Bomo_Chr10	4380194	4382190	KWMTBOMO05515	4016223	0.022502
Bomo_Chr10	4380194	4382190	KWMTBOMO05518	4109133	0.02058
Bomo_Chr10	4380194	4382190	KWMTBOMO05524	4224618	0.035352
Bomo_Chr10	4380194	4382190	KWMTBOMO05525	4228337	0.035351
Bomo_Chr10	4380194	4382190	KWMTBOMO05526	4263677	0.037528
Bomo_Chr10	4380194	4382190	KWMTBOMO05527	4275258	0.036716
Bomo_Chr10	4380194	4382190	KWMTBOMO05528	4280107	0.036137
Bomo_Chr10	4380194	4382190	KWMTBOMO05530	4297958	0.040885
Bomo_Chr10	4380194	4382190	KWMTBOMO05531	4308637	0.043805
Bomo_Chr10	4380194	4382190	KWMTBOMO05532	4311458	0.035524
Bomo_Chr10	4380194	4382190	KWMTBOMO05533	4328708	0.044788
Bomo_Chr10	4380194	4382190	KWMTBOMO05534	4351868	0.063737
Bomo_Chr10	4380194	4382190	KWMTBOMO05535	4365347	0.095412
Bomo_Chr10	4380194	4382190	KWMTBOMO05536	4366437	0.095412
Bomo_Chr10	4380194	4382190	KWMTBOMO05537	4370517	0.149464
Bomo_Chr10	4380194	4382190	KWMTBOMO05538	4371308	0.149461
Bomo_Chr10	4380194	4382190	KWMTBOMO05539	4378237	0.149456
Bomo_Chr10	4380194	4382190	KWMTBOMO05540	4385257	0.15685
Bomo_Chr10	4380194	4382190	KWMTBOMO05541	4407837	0.117671
Bomo_Chr10	4380194	4382190	KWMTBOMO05543	4462528	0.045813
Bomo_Chr10	4380194	4382190	KWMTBOMO05544	4468287	0.045811
Bomo_Chr10	4380194	4382190	KWMTBOMO05546	4501188	0.032158
Bomo_Chr10	4380194	4382190	KWMTBOMO05548	4644997	0.027605
Bomo_Chr10	4380194	4382190	KWMTBOMO05549	4685106	0.025836
Bomo_Chr10	4380194	4382190	KWMTBOMO05550	4691947	0.027789
Bomo_Chr10	4380194	4382190	KWMTBOMO05561	5116481	0.023101
Bomo_Chr10	4380194	4382190	KWMTBOMO05564	5135092	0.020514
Bomo_Chr10	4382197	4383581	KWMTBOMO05534	4351868	0.027801
Bomo_Chr10	4382197	4383581	KWMTBOMO05535	4365347	0.041617
Bomo_Chr10	4382197	4383581	KWMTBOMO05536	4366437	0.041617
Bomo_Chr10	4382197	4383581	KWMTBOMO05537	4370517	0.065194
Bomo_Chr10	4382197	4383581	KWMTBOMO05538	4371308	0.065193
Bomo_Chr10	4382197	4383581	KWMTBOMO05539	4378237	0.065191
Bomo_Chr10	4382197	4383581	KWMTBOMO05540	4385257	0.068416
Bomo_Chr10	4382197	4383581	KWMTBOMO05541	4407837	0.051327
Bomo_Chr10	4383601	4384467	KWMTBOMO05535	4365347	0.020918
Bomo_Chr10	4383601	4384467	KWMTBOMO05536	4366437	0.020918
Bomo_Chr10	4383601	4384467	KWMTBOMO05537	4370517	0.032768
Bomo_Chr10	4383601	4384467	KWMTBOMO05538	4371308	0.032767
Bomo_Chr10	4383601	4384467	KWMTBOMO05539	4378237	0.032766
Bomo_Chr10	4383601	4384467	KWMTBOMO05540	4385257	0.034387
Bomo_Chr10	4383601	4384467	KWMTBOMO05541	4407837	0.025798
Bomo_Chr10	4470630	4471909	KWMTBOMO05543	4462528	0.021708
Bomo_Chr10	4470630	4471909	KWMTBOMO05544	4468287	0.021707
Bomo_Chr10	4667934	4669347	KWMTBOMO05548	4644997	0.027052
Bomo_Chr10	4667934	4669347	KWMTBOMO05549	4685106	0.022939
Bomo_Chr10	4669613	4670800	KWMTBOMO05548	4644997	0.025879
Bomo_Chr10	4669613	4670800	KWMTBOMO05549	4685106	0.069012
Bomo_Chr10	4669613	4670800	KWMTBOMO05550	4691947	0.035279
Bomo_Chr10	4671002	4671739	KWMTBOMO05549	4685106	0.027321
Bomo_Chr10	5194894	5196167	KWMTBOMO05564	5135092	0.026239
Bomo_Chr10	5194894	5196167	KWMTBOMO05565	5201541	0.056988
Bomo_Chr10	5194894	5196167	KWMTBOMO05566	5202642	0.05699
Bomo_Chr10	5194894	5196167	KWMTBOMO05567	5206642	0.056996
Bomo_Chr10	5196790	5197462	KWMTBOMO05565	5201541	0.02481
Bomo_Chr10	5196790	5197462	KWMTBOMO05566	5202642	0.024811
Bomo_Chr10	5196790	5197462	KWMTBOMO05567	5206642	0.024813
Bomo_Chr10	5224704	5226264	KWMTBOMO05568	5239461	0.025628
Bomo_Chr10	5224704	5226264	KWMTBOMO05569	5246902	0.020623
Bomo_Chr10	5251444	5253189	KWMTBOMO05569	5246902	0.020328
Bomo_Chr10	5289996	5290496	KWMTBOMO05576	5291302	0.02724
Bomo_Chr10	5289996	5290496	KWMTBOMO05577	5296702	0.027248
Bomo_Chr10	5369810	5371021	KWMTBOMO05582	5375649	0.021407
Bomo_Chr10	5423566	5424379	KWMTBOMO05588	5439429	0.022658
Bomo_Chr10	5427409	5428318	KWMTBOMO05587	5411139	0.020539
Bomo_Chr10	5427409	5428318	KWMTBOMO05588	5439429	0.026084
Bomo_Chr10	5780749	5782186	KWMTBOMO05599	5786721	0.028378
Bomo_Chr10	5780749	5782186	KWMTBOMO05600	5789942	0.028393
Bomo_Chr10	6122071	6123247	KWMTBOMO05605	6136445	0.027732
Bomo_Chr10	6142774	6144207	KWMTBOMO05605	6136445	0.031665
Bomo_Chr10	6154606	6155812	KWMTBOMO05605	6136445	0.041126
Bomo_Chr10	6154606	6155812	KWMTBOMO05606	6178445	0.023049
Bomo_Chr10	6155814	6156314	KWMTBOMO05605	6136445	0.025958
Bomo_Chr10	6213462	6214385	KWMTBOMO05607	6200634	0.025871
Bomo_Chr10	6213462	6214385	KWMTBOMO05608	6207485	0.025877
Bomo_Chr10	6268779	6269959	KWMTBOMO05609	6261085	0.025731
Bomo_Chr10	6272702	6273714	KWMTBOMO05609	6261085	0.055659
Bomo_Chr10	6272702	6273714	KWMTBOMO05610	6300165	0.020189
Bomo_Chr10	6272702	6273714	KWMTBOMO05611	6302654	0.02019
Bomo_Chr10	6272702	6273714	KWMTBOMO05612	6305755	0.020192
Bomo_Chr10	6276848	6278031	KWMTBOMO05609	6261085	0.082045
Bomo_Chr10	6276848	6278031	KWMTBOMO05610	6300165	0.02976
Bomo_Chr10	6276848	6278031	KWMTBOMO05611	6302654	0.029762
Bomo_Chr10	6276848	6278031	KWMTBOMO05612	6305755	0.029764
Bomo_Chr10	6276848	6278031	KWMTBOMO05613	6313905	0.020922
Bomo_Chr10	6284582	6285717	KWMTBOMO05609	6261085	0.026949
Bomo_Chr10	6284582	6285717	KWMTBOMO05610	6300165	0.021021
Bomo_Chr10	6284582	6285717	KWMTBOMO05611	6302654	0.021023
Bomo_Chr10	6284582	6285717	KWMTBOMO05612	6305755	0.021024
Bomo_Chr10	6303734	6304698	KWMTBOMO05610	6300165	0.029435
Bomo_Chr10	6303734	6304698	KWMTBOMO05611	6302654	0.029437
Bomo_Chr10	6303734	6304698	KWMTBOMO05612	6305755	0.029439
Bomo_Chr10	6303734	6304698	KWMTBOMO05613	6313905	0.032977
Bomo_Chr10	6564827	6565327	KWMTBOMO05619	6562559	0.026661
Bomo_Chr10	6565599	6566421	KWMTBOMO05619	6562559	0.024974
Bomo_Chr10	6600012	6600906	KWMTBOMO05624	6601758	0.039266
Bomo_Chr10	6600012	6600906	KWMTBOMO05625	6603499	0.039266
Bomo_Chr10	6734584	6736398	KWMTBOMO05629	6741368	0.054185
Bomo_Chr10	6754608	6755766	KWMTBOMO05629	6741368	0.042685
Bomo_Chr10	6760652	6762038	KWMTBOMO05629	6741368	0.032322
Bomo_Chr10	6889588	6890843	KWMTBOMO05631	6921422	0.029354
Bomo_Chr10	6889588	6890843	KWMTBOMO05632	6921422	0.029354
Bomo_Chr10	6889588	6890843	KWMTBOMO05633	6924393	0.02936
Bomo_Chr10	6893484	6894802	KWMTBOMO05631	6921422	0.026938
Bomo_Chr10	6893484	6894802	KWMTBOMO05632	6921422	0.026938
Bomo_Chr10	6893484	6894802	KWMTBOMO05633	6924393	0.026943
Bomo_Chr10	6902315	6903226	KWMTBOMO05631	6921422	0.036629
Bomo_Chr10	6902315	6903226	KWMTBOMO05632	6921422	0.036629
Bomo_Chr10	6902315	6903226	KWMTBOMO05633	6924393	0.036637
Bomo_Chr10	6909670	6910649	KWMTBOMO05631	6921422	0.020696
Bomo_Chr10	6909670	6910649	KWMTBOMO05632	6921422	0.020696
Bomo_Chr10	6909670	6910649	KWMTBOMO05633	6924393	0.0207
Bomo_Chr10	6912146	6913053	KWMTBOMO05631	6921422	0.022643
Bomo_Chr10	6912146	6913053	KWMTBOMO05632	6921422	0.022643
Bomo_Chr10	6912146	6913053	KWMTBOMO05633	6924393	0.022648
Bomo_Chr10	6914035	6914882	KWMTBOMO05631	6921422	0.020128
Bomo_Chr10	6914035	6914882	KWMTBOMO05632	6921422	0.020128
Bomo_Chr10	6914035	6914882	KWMTBOMO05633	6924393	0.020132
Bomo_Chr10	6915295	6916572	KWMTBOMO05631	6921422	0.027329
Bomo_Chr10	6915295	6916572	KWMTBOMO05632	6921422	0.027329
Bomo_Chr10	6915295	6916572	KWMTBOMO05633	6924393	0.027334
Bomo_Chr10	6991043	6991833	KWMTBOMO05635	6995123	0.020461
Bomo_Chr10	6991043	6991833	KWMTBOMO05636	7006442	0.021608
Bomo_Chr10	6991043	6991833	KWMTBOMO05637	7007503	0.021608
Bomo_Chr10	7057733	7059213	KWMTBOMO05643	7056883	0.025872
Bomo_Chr10	7089449	7090763	KWMTBOMO05644	7092132	0.021552
Bomo_Chr10	7552473	7553884	KWMTBOMO05665	7540093	0.03698
Bomo_Chr10	7552473	7553884	KWMTBOMO05666	7557142	0.036873
Bomo_Chr10	7552473	7553884	KWMTBOMO05667	7558423	0.036874
Bomo_Chr10	7552473	7553884	KWMTBOMO05668	7565683	0.035402
Bomo_Chr10	7665133	7666244	KWMTBOMO05671	7677742	0.020397
Bomo_Chr10	7723801	7724301	KWMTBOMO05671	7677742	0.038874
Bomo_Chr10	7723801	7724301	KWMTBOMO05672	7812168	0.027195
Bomo_Chr10	7723801	7724301	KWMTBOMO05673	7817968	0.027195
Bomo_Chr10	7724913	7726296	KWMTBOMO05654	7442172	0.035952
Bomo_Chr10	7724913	7726296	KWMTBOMO05655	7445392	0.035951
Bomo_Chr10	7724913	7726296	KWMTBOMO05658	7467673	0.03606
Bomo_Chr10	7724913	7726296	KWMTBOMO05660	7493102	0.03789
Bomo_Chr10	7724913	7726296	KWMTBOMO05662	7512263	0.039013
Bomo_Chr10	7724913	7726296	KWMTBOMO05664	7536812	0.040375
Bomo_Chr10	7724913	7726296	KWMTBOMO05665	7540093	0.040601
Bomo_Chr10	7724913	7726296	KWMTBOMO05666	7557142	0.040933
Bomo_Chr10	7724913	7726296	KWMTBOMO05667	7558423	0.040934
Bomo_Chr10	7724913	7726296	KWMTBOMO05668	7565683	0.041053
Bomo_Chr10	7724913	7726296	KWMTBOMO05669	7573172	0.04307
Bomo_Chr10	7724913	7726296	KWMTBOMO05670	7577233	0.043069
Bomo_Chr10	7724913	7726296	KWMTBOMO05671	7677742	0.091763
Bomo_Chr10	7724913	7726296	KWMTBOMO05672	7812168	0.064195
Bomo_Chr10	7724913	7726296	KWMTBOMO05673	7817968	0.064194
Bomo_Chr10	7724913	7726296	KWMTBOMO05674	7858347	0.046359
Bomo_Chr10	7724913	7726296	KWMTBOMO05676	7882047	0.041106
Bomo_Chr10	7724913	7726296	KWMTBOMO05677	7884718	0.041109
Bomo_Chr10	7724913	7726296	KWMTBOMO05678	7918247	0.037181
Bomo_Chr10	7724913	7726296	KWMTBOMO05679	7920678	0.037758
Bomo_Chr10	7724913	7726296	KWMTBOMO05683	8165422	0.025863
Bomo_Chr10	7724913	7726296	KWMTBOMO05684	8180632	0.023748
Bomo_Chr10	7724913	7726296	KWMTBOMO05689	8245001	0.021264
Bomo_Chr10	7724913	7726296	KWMTBOMO05690	8249251	0.021265
Bomo_Chr10	7724913	7726296	KWMTBOMO05691	8252172	0.021262
Bomo_Chr10	7724913	7726296	KWMTBOMO05693	8303521	0.020265
Bomo_Chr10	7724913	7726296	KWMTBOMO05694	8308312	0.020264
Bomo_Chr10	7724913	7726296	KWMTBOMO05695	8318131	0.020889
Bomo_Chr10	7726589	7728636	KWMTBOMO05671	7677742	0.03945
Bomo_Chr10	7726589	7728636	KWMTBOMO05672	7812168	0.027598
Bomo_Chr10	7726589	7728636	KWMTBOMO05673	7817968	0.027598
Bomo_Chr10	7869293	7869949	KWMTBOMO05675	7868767	0.02188
Bomo_Chr10	7907422	7908775	KWMTBOMO05678	7918247	0.033792
Bomo_Chr10	7907422	7908775	KWMTBOMO05679	7920678	0.024691
Bomo_Chr10	8189909	8191252	KWMTBOMO05684	8180632	0.022466
Bomo_Chr10	8189909	8191252	KWMTBOMO05685	8195532	0.022443
Bomo_Chr10	8189909	8191252	KWMTBOMO05686	8199411	0.022432
Bomo_Chr10	8548195	8549113	KWMTBOMO05701	8532451	0.022194
Bomo_Chr10	8548195	8549113	KWMTBOMO05702	8540991	0.025209
Bomo_Chr10	8548195	8549113	KWMTBOMO05703	8547332	0.025211
Bomo_Chr10	8548195	8549113	KWMTBOMO05704	8552192	0.02457
Bomo_Chr10	8548195	8549113	KWMTBOMO05705	8554872	0.02457
Bomo_Chr10	8548195	8549113	KWMTBOMO05706	8557802	0.02457
Bomo_Chr10	8549459	8550549	KWMTBOMO05702	8540991	0.0273
Bomo_Chr10	8549459	8550549	KWMTBOMO05703	8547332	0.027302
Bomo_Chr10	8549459	8550549	KWMTBOMO05704	8552192	0.026608
Bomo_Chr10	8549459	8550549	KWMTBOMO05705	8554872	0.026607
Bomo_Chr10	8549459	8550549	KWMTBOMO05706	8557802	0.026608
Bomo_Chr10	8579393	8580359	KWMTBOMO05704	8552192	0.021996
Bomo_Chr10	8579393	8580359	KWMTBOMO05705	8554872	0.021996
Bomo_Chr10	8579393	8580359	KWMTBOMO05706	8557802	0.021996
Bomo_Chr10	8579393	8580359	KWMTBOMO05707	8574031	0.034411
Bomo_Chr10	8579393	8580359	KWMTBOMO05708	8574172	0.034411
Bomo_Chr10	8584470	8585077	KWMTBOMO05707	8574031	0.030327
Bomo_Chr10	8584470	8585077	KWMTBOMO05708	8574172	0.030327
Bomo_Chr10	8584470	8585077	KWMTBOMO05709	8592846	0.032448
Bomo_Chr10	8585248	8586130	KWMTBOMO05707	8574031	0.027454
Bomo_Chr10	8585248	8586130	KWMTBOMO05708	8574172	0.027454
Bomo_Chr10	8585248	8586130	KWMTBOMO05709	8592846	0.029375
Bomo_Chr10	8589974	8590871	KWMTBOMO05709	8592846	0.039837
Bomo_Chr10	8598342	8599127	KWMTBOMO05709	8592846	0.021823
Bomo_Chr10	8606572	8608130	KWMTBOMO05709	8592846	0.023016
Bomo_Chr10	8606572	8608130	KWMTBOMO05710	8602575	0.026516
Bomo_Chr10	8606572	8608130	KWMTBOMO05711	8610796	0.026765
Bomo_Chr10	8633776	8634610	KWMTBOMO05712	8630675	0.025511
Bomo_Chr10	8663801	8664379	KWMTBOMO05713	8662045	0.021942
Bomo_Chr10	8663801	8664379	KWMTBOMO05714	8665116	0.021946
Bomo_Chr10	8663801	8664379	KWMTBOMO05715	8672545	0.022659
Bomo_Chr10	8663801	8664379	KWMTBOMO05716	8674606	0.022663
Bomo_Chr10	8701936	8703201	KWMTBOMO05717	8697595	0.031241
Bomo_Chr10	8701936	8703201	KWMTBOMO05718	8712736	0.029801
Bomo_Chr10	8706972	8707800	KWMTBOMO05717	8697595	0.022347
Bomo_Chr10	8706972	8707800	KWMTBOMO05718	8712736	0.021317
Bomo_Chr10	8717884	8719110	KWMTBOMO05717	8697595	0.024638
Bomo_Chr10	8717884	8719110	KWMTBOMO05718	8712736	0.033291
Bomo_Chr10	8717884	8719110	KWMTBOMO05719	8727805	0.033907
Bomo_Chr10	8723349	8725256	KWMTBOMO05718	8712736	0.021572
Bomo_Chr10	8723349	8725256	KWMTBOMO05719	8727805	0.023499
Bomo_Chr10	8755783	8756788	KWMTBOMO05720	8752655	0.02308
Bomo_Chr10	8755783	8756788	KWMTBOMO05721	8753076	0.023081
Bomo_Chr10	8845877	8847630	KWMTBOMO05725	8834516	0.026149
Bomo_Chr10	8845877	8847630	KWMTBOMO05726	8853376	0.024099
Bomo_Chr10	8867265	8867765	KWMTBOMO05726	8853376	0.022151
Bomo_Chr10	8867265	8867765	KWMTBOMO05727	8862756	0.024737
Bomo_Chr10	8867803	8868303	KWMTBOMO05726	8853376	0.022254
Bomo_Chr10	8867803	8868303	KWMTBOMO05727	8862756	0.024852
Bomo_Chr10	8868425	8868925	KWMTBOMO05726	8853376	0.021833
Bomo_Chr10	8868425	8868925	KWMTBOMO05727	8862756	0.024381
Bomo_Chr10	8917056	8919383	KWMTBOMO05728	8904655	0.025712
Bomo_Chr10	8917056	8919383	KWMTBOMO05729	8928145	0.024313
Bomo_Chr10	9086794	9087748	KWMTBOMO05739	9081504	0.026236
Bomo_Chr10	9086794	9087748	KWMTBOMO05740	9089895	0.026235
Bomo_Chr10	9114085	9115255	KWMTBOMO05741	9113074	0.037076
Bomo_Chr10	9114085	9115255	KWMTBOMO05742	9121945	0.032545
Bomo_Chr10	9325046	9325781	KWMTBOMO05749	9303494	0.02744
Bomo_Chr10	9325046	9325781	KWMTBOMO05750	9306505	0.027441
Bomo_Chr10	9325046	9325781	KWMTBOMO05751	9318924	0.064945
Bomo_Chr10	9391762	9392838	KWMTBOMO05752	9380955	0.020534
Bomo_Chr10	9403440	9404217	KWMTBOMO05753	9401445	0.025068
Bomo_Chr10	9407269	9408596	KWMTBOMO05753	9401445	0.036737
Bomo_Chr10	9407269	9408596	KWMTBOMO05755	9424724	0.022608
Bomo_Chr10	9407269	9408596	KWMTBOMO05756	9427785	0.022609
Bomo_Chr10	9429014	9429904	KWMTBOMO05753	9401445	0.024543
Bomo_Chr10	9429014	9429904	KWMTBOMO05755	9424724	0.03565
Bomo_Chr10	9429014	9429904	KWMTBOMO05756	9427785	0.035652
Bomo_Chr10	9516829	9517746	KWMTBOMO05761	9493468	0.023285
Bomo_Chr10	9516829	9517746	KWMTBOMO05762	9523167	0.039727
Bomo_Chr10	9516829	9517746	KWMTBOMO05763	9535377	0.02123
Bomo_Chr10	9516829	9517746	KWMTBOMO05764	9537228	0.02123
Bomo_Chr10	9518330	9519810	KWMTBOMO05761	9493468	0.02954
Bomo_Chr10	9518330	9519810	KWMTBOMO05762	9523167	0.050398
Bomo_Chr10	9518330	9519810	KWMTBOMO05763	9535377	0.026932
Bomo_Chr10	9518330	9519810	KWMTBOMO05764	9537228	0.026933
Bomo_Chr10	9544108	9544874	KWMTBOMO05763	9535377	0.02088
Bomo_Chr10	9544108	9544874	KWMTBOMO05764	9537228	0.02088
Bomo_Chr10	9544108	9544874	KWMTBOMO05765	9553547	0.030166
Bomo_Chr10	9545468	9546345	KWMTBOMO05763	9535377	0.047088
Bomo_Chr10	9545468	9546345	KWMTBOMO05764	9537228	0.047089
Bomo_Chr10	9545468	9546345	KWMTBOMO05765	9553547	0.068031
Bomo_Chr10	9548572	9549072	KWMTBOMO05765	9553547	0.023173
Bomo_Chr10	9592104	9592945	KWMTBOMO05766	9618047	0.028422
Bomo_Chr10	9592104	9592945	KWMTBOMO05767	9626947	0.021028
Bomo_Chr10	9615155	9616110	KWMTBOMO05766	9618047	0.022081
Bomo_Chr10	9615155	9616110	KWMTBOMO05767	9626947	0.020177
Bomo_Chr10	9809076	9810237	KWMTBOMO05776	9815405	0.023277
Bomo_Chr10	9811508	9812792	KWMTBOMO05776	9815405	0.039083
Bomo_Chr10	9811508	9812792	KWMTBOMO05778	9828195	0.037122
Bomo_Chr10	9856075	9857414	KWMTBOMO05781	9878855	0.027672
Bomo_Chr10	9862955	9864229	KWMTBOMO05781	9878855	0.034319
Bomo_Chr10	9867229	9867966	KWMTBOMO05781	9878855	0.064059
Bomo_Chr10	9867229	9867966	KWMTBOMO05782	9882705	0.027242
Bomo_Chr10	9867229	9867966	KWMTBOMO05783	9883566	0.027243
Bomo_Chr10	9873456	9874589	KWMTBOMO05781	9878855	0.02313
Bomo_Chr10	9875338	9876498	KWMTBOMO05781	9878855	0.024531
Bomo_Chr10	9890904	9892156	KWMTBOMO05782	9882705	0.02966
Bomo_Chr10	9890904	9892156	KWMTBOMO05783	9883566	0.029661
Bomo_Chr10	10012663	10014640	KWMTBOMO05787	10020935	0.025602
Bomo_Chr10	10012663	10014640	KWMTBOMO05788	10022256	0.025603
Bomo_Chr10	10045792	10046961	KWMTBOMO05789	10054175	0.023709
Bomo_Chr10	10045792	10046961	KWMTBOMO05790	10059146	0.02371
Bomo_Chr10	10065862	10068052	KWMTBOMO05789	10054175	0.033726
Bomo_Chr10	10065862	10068052	KWMTBOMO05790	10059146	0.033727
Bomo_Chr10	10156676	10157629	KWMTBOMO05791	10154225	0.021093
Bomo_Chr10	10277669	10279548	KWMTBOMO05796	10302930	0.021778
Bomo_Chr10	10280086	10281464	KWMTBOMO05796	10302930	0.021685
Bomo_Chr10	10320493	10321674	KWMTBOMO05797	10329250	0.030788
Bomo_Chr10	10320493	10321674	KWMTBOMO05798	10337281	0.022691
Bomo_Chr10	10381838	10383075	KWMTBOMO05800	10377111	0.023813
Bomo_Chr10	10381838	10383075	KWMTBOMO05801	10378911	0.023819
Bomo_Chr10	10469079	10469579	KWMTBOMO05803	10451911	0.022073
Bomo_Chr10	10469079	10469579	KWMTBOMO05804	10460040	0.026561
Bomo_Chr10	10469079	10469579	KWMTBOMO05805	10462401	0.026563
Bomo_Chr10	10469079	10469579	KWMTBOMO05806	10470901	0.027494
Bomo_Chr10	10666133	10667062	KWMTBOMO05811	10659710	0.046303
Bomo_Chr10	10666133	10667062	KWMTBOMO05812	10669121	0.051496
Bomo_Chr10	10666133	10667062	KWMTBOMO05814	10698641	0.025906
Bomo_Chr10	10699642	10700864	KWMTBOMO05814	10698641	0.03197
Bomo_Chr10	10699642	10700864	KWMTBOMO05813	10706100	0.028853
Bomo_Chr10	10699642	10700864	KWMTBOMO05815	10712350	0.024856
Bomo_Chr10	10699642	10700864	KWMTBOMO05816	10719071	0.024862
Bomo_Chr10	10706735	10708346	KWMTBOMO05812	10669121	0.020016
Bomo_Chr10	10706735	10708346	KWMTBOMO05814	10698641	0.056114
Bomo_Chr10	10706735	10708346	KWMTBOMO05813	10706100	0.050643
Bomo_Chr10	10706735	10708346	KWMTBOMO05815	10712350	0.043627
Bomo_Chr10	10706735	10708346	KWMTBOMO05816	10719071	0.043637
Bomo_Chr10	10713694	10714302	KWMTBOMO05812	10669121	0.021611
Bomo_Chr10	10713694	10714302	KWMTBOMO05814	10698641	0.038213
Bomo_Chr10	10713694	10714302	KWMTBOMO05813	10706100	0.075911
Bomo_Chr10	10713694	10714302	KWMTBOMO05815	10712350	0.108889
Bomo_Chr10	10713694	10714302	KWMTBOMO05816	10719071	0.108914
Bomo_Chr10	10714438	10714938	KWMTBOMO05815	10712350	0.027276
Bomo_Chr10	10714438	10714938	KWMTBOMO05816	10719071	0.027282
Bomo_Chr10	10716803	10717698	KWMTBOMO05814	10698641	0.023393
Bomo_Chr10	10716803	10717698	KWMTBOMO05813	10706100	0.046471
Bomo_Chr10	10716803	10717698	KWMTBOMO05815	10712350	0.066659
Bomo_Chr10	10716803	10717698	KWMTBOMO05816	10719071	0.066675
Bomo_Chr10	10724260	10725652	KWMTBOMO05815	10712350	0.029196
Bomo_Chr10	10724260	10725652	KWMTBOMO05816	10719071	0.029203
Bomo_Chr10	11078565	11079903	KWMTBOMO05824	11063790	0.021555
Bomo_Chr10	11511031	11511876	KWMTBOMO05832	11507963	0.02503
Bomo_Chr10	11511031	11511876	KWMTBOMO05833	11517223	0.027396
Bomo_Chr10	11542733	11544441	KWMTBOMO05833	11517223	0.025755
Bomo_Chr10	11562509	11564274	KWMTBOMO05835	11575252	0.043152
Bomo_Chr10	11611597	11612820	KWMTBOMO05835	11575252	0.026362
Bomo_Chr10	11634467	11635815	KWMTBOMO05835	11575252	0.027226
Bomo_Chr10	11671804	11672515	KWMTBOMO05836	11660692	0.020889
Bomo_Chr10	11738453	11740065	KWMTBOMO05837	11744563	0.021188
Bomo_Chr10	11762699	11763889	KWMTBOMO05837	11744563	0.025314
Bomo_Chr10	11782840	11783925	KWMTBOMO05837	11744563	0.026088
Bomo_Chr10	11782840	11783925	KWMTBOMO05838	11797261	0.042009
Bomo_Chr10	11793153	11793868	KWMTBOMO05838	11797261	0.023288
Bomo_Chr10	11870349	11871613	KWMTBOMO05841	11878771	0.023465
Bomo_Chr10	12468933	12470567	KWMTBOMO05847	12461690	0.036037
Bomo_Chr10	12468933	12470567	KWMTBOMO05848	12467950	0.03606
Bomo_Chr10	12468933	12470567	KWMTBOMO05849	12471941	0.029344
Bomo_Chr10	12468933	12470567	KWMTBOMO05851	12477711	0.029343
Bomo_Chr10	12595598	12596402	KWMTBOMO05855	12603885	0.021657
Bomo_Chr10	12595598	12596402	KWMTBOMO05856	12605256	0.021657
Bomo_Chr10	12596949	12597942	KWMTBOMO05855	12603885	0.028268
Bomo_Chr10	12596949	12597942	KWMTBOMO05856	12605256	0.028268
Bomo_Chr10	12646636	12649561	KWMTBOMO05858	12618145	0.020559
Bomo_Chr10	12646636	12649561	KWMTBOMO05859	12620176	0.038517
Bomo_Chr10	12646636	12649561	KWMTBOMO05860	12645226	0.070454
Bomo_Chr10	12698257	12698757	KWMTBOMO05862	12828505	0.020112
Bomo_Chr10	12993032	12994624	KWMTBOMO05866	12997160	0.049556
Bomo_Chr10	12993032	12994624	KWMTBOMO05867	13002500	0.049931
Bomo_Chr10	12993032	12994624	KWMTBOMO05869	13006060	0.04993
Bomo_Chr10	13046768	13048131	KWMTBOMO05872	13038260	0.022282
Bomo_Chr10	13046768	13048131	KWMTBOMO05873	13075960	0.029916
Bomo_Chr10	13053157	13053911	KWMTBOMO05872	13038260	0.0224
Bomo_Chr10	13089668	13090679	KWMTBOMO05875	13092101	0.02736
Bomo_Chr10	13106289	13107402	KWMTBOMO05875	13092101	0.039787
Bomo_Chr10	13198414	13199642	KWMTBOMO05878	13196931	0.054748
Bomo_Chr10	13199822	13200820	KWMTBOMO05878	13196931	0.037922
Bomo_Chr10	13201685	13202185	KWMTBOMO05878	13196931	0.032172
Bomo_Chr10	13424889	13426479	KWMTBOMO05883	13429355	0.049716
Bomo_Chr10	13424889	13426479	KWMTBOMO05884	13443036	0.036537
Bomo_Chr10	13424889	13426479	KWMTBOMO05885	13456095	0.028385
Bomo_Chr10	13574994	13575749	KWMTBOMO05892	13566265	0.023275
Bomo_Chr10	13574994	13575749	KWMTBOMO05893	13567986	0.023278
Bomo_Chr10	13574994	13575749	KWMTBOMO05894	13576546	0.025281
Bomo_Chr10	13605028	13606134	KWMTBOMO05895	13603865	0.023399
Bomo_Chr10	13605028	13606134	KWMTBOMO05896	13607266	0.023399
Bomo_Chr10	13777144	13778089	KWMTBOMO05899	13775360	0.028315
Bomo_Chr10	14148766	14150698	KWMTBOMO05904	14146195	0.025906
Bomo_Chr10	14148766	14150698	KWMTBOMO05905	14146366	0.025906
Bomo_Chr10	14239084	14240235	KWMTBOMO05909	14227765	0.02048
Bomo_Chr10	14239084	14240235	KWMTBOMO05910	14229396	0.020482
Bomo_Chr10	14381187	14381687	KWMTBOMO05917	14374786	0.021869
Bomo_Chr10	14381187	14381687	KWMTBOMO05918	14389805	0.021714
Bomo_Chr10	14381959	14383336	KWMTBOMO05917	14374786	0.055829
Bomo_Chr10	14381959	14383336	KWMTBOMO05918	14389805	0.055434
Bomo_Chr10	14381959	14383336	KWMTBOMO05919	14391016	0.036953
Bomo_Chr10	14381959	14383336	KWMTBOMO05920	14406395	0.022409
Bomo_Chr10	14381959	14383336	KWMTBOMO05921	14407166	0.022409
Bomo_Chr10	14392552	14393919	KWMTBOMO05917	14374786	0.024879
Bomo_Chr10	14392552	14393919	KWMTBOMO05918	14389805	0.031702
Bomo_Chr10	14392552	14393919	KWMTBOMO05919	14391016	0.035812
Bomo_Chr10	14392552	14393919	KWMTBOMO05920	14406395	0.035508
Bomo_Chr10	14392552	14393919	KWMTBOMO05921	14407166	0.035508
Bomo_Chr10	14428493	14429712	KWMTBOMO05922	14417905	0.021884
Bomo_Chr10	14466978	14469413	KWMTBOMO05922	14417905	0.020778
Bomo_Chr10	14466978	14469413	KWMTBOMO05926	14514294	0.020852
Bomo_Chr10	14466978	14469413	KWMTBOMO05927	14516725	0.020852
Bomo_Chr10	14508948	14510314	KWMTBOMO05926	14514294	0.033468
Bomo_Chr10	14508948	14510314	KWMTBOMO05927	14516725	0.033468
Bomo_Chr10	14526219	14526965	KWMTBOMO05926	14514294	0.041351
Bomo_Chr10	14526219	14526965	KWMTBOMO05927	14516725	0.041351
Bomo_Chr10	14555322	14556875	KWMTBOMO05928	14561024	0.031964
Bomo_Chr10	14555322	14556875	KWMTBOMO05929	14565645	0.031964
Bomo_Chr10	14555322	14556875	KWMTBOMO05930	14569035	0.031965
Bomo_Chr10	14576041	14577373	KWMTBOMO05928	14561024	0.024417
Bomo_Chr10	14576041	14577373	KWMTBOMO05929	14565645	0.024416
Bomo_Chr10	14576041	14577373	KWMTBOMO05930	14569035	0.024418
Bomo_Chr10	14583687	14585127	KWMTBOMO05931	14618685	0.021485
Bomo_Chr10	14619978	14620749	KWMTBOMO05931	14618685	0.035401
Bomo_Chr10	14929966	14930981	KWMTBOMO05940	14957647	0.024337
Bomo_Chr10	14951311	14952554	KWMTBOMO05940	14957647	0.022654
Bomo_Chr10	14951311	14952554	KWMTBOMO05941	14961778	0.022792
Bomo_Chr10	14958276	14959322	KWMTBOMO05940	14957647	0.020282
Bomo_Chr10	14958276	14959322	KWMTBOMO05941	14961778	0.020406
Bomo_Chr10	15303507	15304494	KWMTBOMO05950	15307950	0.038941
Bomo_Chr10	15303507	15304494	KWMTBOMO05951	15310241	0.020697
Bomo_Chr10	15304516	15305220	KWMTBOMO05950	15307950	0.02529
Bomo_Chr10	15322992	15323492	KWMTBOMO05951	15310241	0.022696
Bomo_Chr10	15323517	15326160	KWMTBOMO05950	15307950	0.057219
Bomo_Chr10	15323517	15326160	KWMTBOMO05951	15310241	0.118911
Bomo_Chr10	15323517	15326160	KWMTBOMO05954	15350220	0.059196
Bomo_Chr10	15323517	15326160	KWMTBOMO05956	15418661	0.05064
Bomo_Chr10	15323517	15326160	KWMTBOMO05961	15547470	0.020081
Bomo_Chr10	15323517	15326160	KWMTBOMO05968	15612288	0.020283
Bomo_Chr10	15323517	15326160	KWMTBOMO05972	15653217	0.023616
Bomo_Chr10	15357537	15358678	KWMTBOMO05954	15350220	0.029071
Bomo_Chr10	15445277	15445777	KWMTBOMO05956	15418661	0.021674
Bomo_Chr10	15530813	15532157	KWMTBOMO05961	15547470	0.031725
Bomo_Chr10	15538776	15539654	KWMTBOMO05961	15547470	0.034342
Bomo_Chr10	15544582	15545432	KWMTBOMO05961	15547470	0.023466
Bomo_Chr10	15592136	15593079	KWMTBOMO05967	15609497	0.022383
Bomo_Chr10	15610261	15611020	KWMTBOMO05967	15609497	0.02853
Bomo_Chr10	15610261	15611020	KWMTBOMO05968	15612288	0.026042
Bomo_Chr10	15706252	15707469	KWMTBOMO05978	15704027	0.026844
Bomo_Chr10	15706252	15707469	KWMTBOMO05979	15708838	0.026858
Bomo_Chr10	15727885	15728703	KWMTBOMO05981	15726997	0.031734
Bomo_Chr10	15727885	15728703	KWMTBOMO05982	15733838	0.030135
Bomo_Chr10	15742062	15743294	KWMTBOMO05982	15733838	0.02405
Bomo_Chr10	15744023	15745502	KWMTBOMO05982	15733838	0.028042
Bomo_Chr10	15779276	15780753	KWMTBOMO05985	15770918	0.034627
Bomo_Chr10	15779276	15780753	KWMTBOMO05986	15798567	0.035683
Bomo_Chr10	15794910	15795497	KWMTBOMO05986	15798567	0.022808
Bomo_Chr10	15794910	15795497	KWMTBOMO05987	15804728	0.021296
Bomo_Chr10	15812607	15813538	KWMTBOMO05986	15798567	0.035352
Bomo_Chr10	15812607	15813538	KWMTBOMO05987	15804728	0.075577
Bomo_Chr10	15812607	15813538	KWMTBOMO05988	15836738	0.033578
Bomo_Chr10	15817746	15818576	KWMTBOMO05987	15804728	0.028587
Bomo_Chr10	15823517	15824107	KWMTBOMO05988	15836738	0.025431
Bomo_Chr10	15829572	15830678	KWMTBOMO05988	15836738	0.039
Bomo_Chr10	15834763	15835437	KWMTBOMO05988	15836738	0.02012
Bomo_Chr10	15887297	15888058	KWMTBOMO05990	15870027	0.032918
Bomo_Chr10	15887297	15888058	KWMTBOMO05991	15876598	0.032921
Bomo_Chr10	15887297	15888058	KWMTBOMO05993	15898568	0.025961
Bomo_Chr10	15887297	15888058	KWMTBOMO05992	15899057	0.025961
Bomo_Chr10	15942706	15943262	KWMTBOMO05997	15934528	0.021369
Bomo_Chr10	15944441	15945147	KWMTBOMO05997	15934528	0.021143
Bomo_Chr10	15946155	15946662	KWMTBOMO05997	15934528	0.024455
Bomo_Chr10	15947547	15948047	KWMTBOMO05997	15934528	0.023847
Bomo_Chr10	15948084	15949301	KWMTBOMO05995	15929298	0.035567
Bomo_Chr10	15948084	15949301	KWMTBOMO05997	15934528	0.0695
Bomo_Chr10	15948084	15949301	KWMTBOMO05998	15950197	0.040606
Bomo_Chr10	15948084	15949301	KWMTBOMO05999	15951308	0.040607
Bomo_Chr10	16052826	16054513	KWMTBOMO06006	16042611	0.041665
Bomo_Chr10	16052826	16054513	KWMTBOMO06007	16042762	0.041665
Bomo_Chr10	16052826	16054513	KWMTBOMO06008	16048632	0.041672
Bomo_Chr10	16052826	16054513	KWMTBOMO06009	16060881	0.045107
Bomo_Chr10	16052826	16054513	KWMTBOMO06010	16061302	0.045108
Bomo_Chr10	16052826	16054513	KWMTBOMO06011	16068682	0.045127
Bomo_Chr10	16055103	16056447	KWMTBOMO06006	16042611	0.033852
Bomo_Chr10	16055103	16056447	KWMTBOMO06007	16042762	0.033852
Bomo_Chr10	16055103	16056447	KWMTBOMO06008	16048632	0.033858
Bomo_Chr10	16055103	16056447	KWMTBOMO06009	16060881	0.036649
Bomo_Chr10	16055103	16056447	KWMTBOMO06010	16061302	0.036649
Bomo_Chr10	16055103	16056447	KWMTBOMO06011	16068682	0.036664
Bomo_Chr10	16092141	16093393	KWMTBOMO06012	16088801	0.045154
Bomo_Chr10	16695115	16695627	KWMTBOMO06024	16684152	0.038253
Bomo_Chr10	16695115	16695627	KWMTBOMO06025	16699892	0.03866
Bomo_Chr10	16700718	16702554	KWMTBOMO06025	16699892	0.023988
Bomo_Chr10	16776009	16777360	KWMTBOMO06029	16771981	0.026418
Bomo_Chr10	16776009	16777360	KWMTBOMO06030	16789011	0.02198
Bomo_Chr10	16844916	16845724	KWMTBOMO06035	16843136	0.031236
Bomo_Chr10	16845895	16846749	KWMTBOMO06034	16836815	0.025474
Bomo_Chr10	16845895	16846749	KWMTBOMO06035	16843136	0.050566
Bomo_Chr10	16845895	16846749	KWMTBOMO06036	16868145	0.022051
Bomo_Chr10	16846905	16847405	KWMTBOMO06035	16843136	0.029198
Bomo_Chr10	16851129	16851995	KWMTBOMO06035	16843136	0.029991
Bomo_Chr10	16851129	16851995	KWMTBOMO06036	16868145	0.025923
Bomo_Chr10	16867033	16867533	KWMTBOMO06036	16868145	0.036269
Bomo_Chr10	16867033	16867533	KWMTBOMO06037	16870856	0.027573
Bomo_Chr10	16868802	16869302	KWMTBOMO06036	16868145	0.031962
Bomo_Chr10	16868802	16869302	KWMTBOMO06037	16870856	0.024299
Bomo_Chr10	16897881	16898457	KWMTBOMO06038	16893156	0.02101
Bomo_Chr10	16901895	16903069	KWMTBOMO06038	16893156	0.023805
Bomo_Chr10	16917178	16918044	KWMTBOMO06039	16912165	0.02216
Bomo_Chr10	16917178	16918044	KWMTBOMO06040	16913376	0.022161
Bomo_Chr10	16935713	16937232	KWMTBOMO06041	16938845	0.023604
Bomo_Chr10	17000142	17001562	KWMTBOMO06044	17008395	0.024558
Bomo_Chr10	17000142	17001562	KWMTBOMO06045	17009426	0.02456
Bomo_Chr10	17048665	17049294	KWMTBOMO06046	17032475	0.021033
Bomo_Chr10	17048665	17049294	KWMTBOMO06047	17036326	0.021037
Bomo_Chr10	17048665	17049294	KWMTBOMO06049	17045895	0.020922
Bomo_Chr10	17048665	17049294	KWMTBOMO06050	17047236	0.020925
Bomo_Chr10	17076098	17077199	KWMTBOMO06052	17078875	0.043835
Bomo_Chr10	17076098	17077199	KWMTBOMO06053	17079066	0.043836
Bomo_Chr10	17121274	17122529	KWMTBOMO06054	17125195	0.051534
Bomo_Chr10	17121274	17122529	KWMTBOMO06055	17125296	0.051534
Bomo_Chr10	17121274	17122529	KWMTBOMO06056	17131646	0.024174
Bomo_Chr10	17122808	17123308	KWMTBOMO06054	17125195	0.024553
Bomo_Chr10	17122808	17123308	KWMTBOMO06055	17125296	0.024553
Bomo_Chr10	17152209	17153515	KWMTBOMO06054	17125195	0.030108
Bomo_Chr10	17152209	17153515	KWMTBOMO06055	17125296	0.030109
Bomo_Chr10	17152209	17153515	KWMTBOMO06056	17131646	0.024772
Bomo_Chr10	17152209	17153515	KWMTBOMO06057	17145515	0.045202
Bomo_Chr10	17546205	17546816	KWMTBOMO06064	17295364	0.023766
Bomo_Chr10	17546205	17546816	KWMTBOMO06068	17511955	0.045368
Bomo_Chr10	17546205	17546816	KWMTBOMO06069	17545084	0.076454
Bomo_Chr10	17547440	17547998	KWMTBOMO06064	17295364	0.020846
Bomo_Chr10	17547440	17547998	KWMTBOMO06068	17511955	0.039793
Bomo_Chr10	17547440	17547998	KWMTBOMO06069	17545084	0.06706
Bomo_Chr10	17548044	17548645	KWMTBOMO06064	17295364	0.033786
Bomo_Chr10	17548044	17548645	KWMTBOMO06068	17511955	0.064495
Bomo_Chr10	17548044	17548645	KWMTBOMO06069	17545084	0.108687
Bomo_Chr10	17548044	17548645	KWMTBOMO06071	17574215	0.025216
Bomo_Chr10	17549070	17551434	KWMTBOMO05873	13075960	0.035257
Bomo_Chr10	17549070	17551434	KWMTBOMO05878	13196931	0.021832
Bomo_Chr10	17549070	17551434	KWMTBOMO05881	13267970	0.021822
Bomo_Chr10	17549070	17551434	KWMTBOMO05900	13846800	0.024241
Bomo_Chr10	17549070	17551434	KWMTBOMO05915	14357145	0.022923
Bomo_Chr10	17549070	17551434	KWMTBOMO05956	15418661	0.056631
Bomo_Chr10	17549070	17551434	KWMTBOMO05968	15612288	0.036233
Bomo_Chr10	17549070	17551434	KWMTBOMO05970	15639507	0.056745
Bomo_Chr10	17549070	17551434	KWMTBOMO05971	15640448	0.043311
Bomo_Chr10	17549070	17551434	KWMTBOMO05972	15653217	0.028991
Bomo_Chr10	17549070	17551434	KWMTBOMO05976	15680517	0.029324
Bomo_Chr10	17549070	17551434	KWMTBOMO05977	15682678	0.029341
Bomo_Chr10	17549070	17551434	KWMTBOMO05982	15733838	0.030962
Bomo_Chr10	17549070	17551434	KWMTBOMO05993	15898568	0.038739
Bomo_Chr10	17549070	17551434	KWMTBOMO05992	15899057	0.038743
Bomo_Chr10	17549070	17551434	KWMTBOMO05995	15929298	0.067478
Bomo_Chr10	17549070	17551434	KWMTBOMO05997	15934528	0.025333
Bomo_Chr10	17549070	17551434	KWMTBOMO06000	15975027	0.040443
Bomo_Chr10	17549070	17551434	KWMTBOMO06003	16011361	0.043959
Bomo_Chr10	17549070	17551434	KWMTBOMO06004	16013342	0.043991
Bomo_Chr10	17549070	17551434	KWMTBOMO06006	16042611	0.05569
Bomo_Chr10	17549070	17551434	KWMTBOMO06007	16042762	0.055692
Bomo_Chr10	17549070	17551434	KWMTBOMO06008	16048632	0.055771
Bomo_Chr10	17549070	17551434	KWMTBOMO06009	16060881	0.021997
Bomo_Chr10	17549070	17551434	KWMTBOMO06010	16061302	0.022003
Bomo_Chr10	17549070	17551434	KWMTBOMO06011	16068682	0.022108
Bomo_Chr10	17549070	17551434	KWMTBOMO06012	16088801	0.082528
Bomo_Chr10	17549070	17551434	KWMTBOMO06018	16211701	0.045453
Bomo_Chr10	17549070	17551434	KWMTBOMO06019	16226242	0.05271
Bomo_Chr10	17549070	17551434	KWMTBOMO06024	16684152	0.05855
Bomo_Chr10	17549070	17551434	KWMTBOMO06025	16699892	0.032345
Bomo_Chr10	17549070	17551434	KWMTBOMO06026	16742742	0.066099
Bomo_Chr10	17549070	17551434	KWMTBOMO06027	16746961	0.066139
Bomo_Chr10	17549070	17551434	KWMTBOMO06028	16749032	0.066147
Bomo_Chr10	17549070	17551434	KWMTBOMO06029	16771981	0.061417
Bomo_Chr10	17549070	17551434	KWMTBOMO06030	16789011	0.076825
Bomo_Chr10	17549070	17551434	KWMTBOMO06034	16836815	0.074422
Bomo_Chr10	17549070	17551434	KWMTBOMO06035	16843136	0.049589
Bomo_Chr10	17549070	17551434	KWMTBOMO06036	16868145	0.061707
Bomo_Chr10	17549070	17551434	KWMTBOMO06037	16870856	0.057785
Bomo_Chr10	17549070	17551434	KWMTBOMO06038	16893156	0.059721
Bomo_Chr10	17549070	17551434	KWMTBOMO06039	16912165	0.10795
Bomo_Chr10	17549070	17551434	KWMTBOMO06040	16913376	0.107957
Bomo_Chr10	17549070	17551434	KWMTBOMO06041	16938845	0.048907
Bomo_Chr10	17549070	17551434	KWMTBOMO06044	17008395	0.119017
Bomo_Chr10	17549070	17551434	KWMTBOMO06045	17009426	0.119026
Bomo_Chr10	17549070	17551434	KWMTBOMO06046	17032475	0.086587
Bomo_Chr10	17549070	17551434	KWMTBOMO06047	17036326	0.086605
Bomo_Chr10	17549070	17551434	KWMTBOMO06049	17045895	0.072731
Bomo_Chr10	17549070	17551434	KWMTBOMO06050	17047236	0.072741
Bomo_Chr10	17549070	17551434	KWMTBOMO06052	17078875	0.066623
Bomo_Chr10	17549070	17551434	KWMTBOMO06053	17079066	0.066624
Bomo_Chr10	17549070	17551434	KWMTBOMO06054	17125195	0.028843
Bomo_Chr10	17549070	17551434	KWMTBOMO06055	17125296	0.028843
Bomo_Chr10	17549070	17551434	KWMTBOMO06056	17131646	0.15495
Bomo_Chr10	17549070	17551434	KWMTBOMO06057	17145515	0.141077
Bomo_Chr10	17549070	17551434	KWMTBOMO06064	17295364	0.218229
Bomo_Chr10	17549070	17551434	KWMTBOMO06068	17511955	0.383391
Bomo_Chr10	17549070	17551434	KWMTBOMO06069	17545084	0.394551
Bomo_Chr10	17549070	17551434	KWMTBOMO06071	17574215	0.478522
Bomo_Chr10	17552021	17552551	KWMTBOMO06056	17131646	0.022712
Bomo_Chr10	17552021	17552551	KWMTBOMO06057	17145515	0.020679
Bomo_Chr10	17552021	17552551	KWMTBOMO06064	17295364	0.031987
Bomo_Chr10	17552021	17552551	KWMTBOMO06068	17511955	0.056196
Bomo_Chr10	17552021	17552551	KWMTBOMO06069	17545084	0.057832
Bomo_Chr10	17552021	17552551	KWMTBOMO06071	17574215	0.07014
Bomo_Chr10	17568080	17569879	KWMTBOMO06071	17574215	0.039052
Bomo_Chr11	32103	32872	KWMTBOMO06073	33415	0.025675
Bomo_Chr11	34366	35319	KWMTBOMO06073	33415	0.050358
Bomo_Chr11	35340	36071	KWMTBOMO06073	33415	0.037077
Bomo_Chr11	45534	47285	KWMTBOMO06073	33415	0.057769
Bomo_Chr11	49859	51034	KWMTBOMO06073	33415	0.038542
Bomo_Chr11	130096	130909	KWMTBOMO06081	139845	0.02704
Bomo_Chr11	132697	133462	KWMTBOMO06081	139845	0.026119
Bomo_Chr11	136659	137291	KWMTBOMO06081	139845	0.030713
Bomo_Chr11	197025	198082	KWMTBOMO06088	190305	0.021532
Bomo_Chr11	239718	241988	KWMTBOMO06089	212194	0.021869
Bomo_Chr11	239718	241988	KWMTBOMO06090	214055	0.021865
Bomo_Chr11	239718	241988	KWMTBOMO06091	227994	0.029902
Bomo_Chr11	239718	241988	KWMTBOMO06092	245734	0.045831
Bomo_Chr11	239718	241988	KWMTBOMO06093	247585	0.045825
Bomo_Chr11	325228	327823	KWMTBOMO06097	324164	0.044082
Bomo_Chr11	325228	327823	KWMTBOMO06099	338534	0.04291
Bomo_Chr11	325228	327823	KWMTBOMO06100	340565	0.022236
Bomo_Chr11	538099	539351	KWMTBOMO06106	536584	0.033611
Bomo_Chr11	538099	539351	KWMTBOMO06107	543834	0.031447
Bomo_Chr11	538099	539351	KWMTBOMO06108	545005	0.031438
Bomo_Chr11	565699	566324	KWMTBOMO06109	560384	0.027549
Bomo_Chr11	565699	566324	KWMTBOMO06110	562085	0.027544
Bomo_Chr11	566819	567319	KWMTBOMO06109	560384	0.021122
Bomo_Chr11	566819	567319	KWMTBOMO06110	562085	0.021118
Bomo_Chr11	567358	567858	KWMTBOMO06109	560384	0.028057
Bomo_Chr11	567358	567858	KWMTBOMO06110	562085	0.028052
Bomo_Chr11	572782	573544	KWMTBOMO06109	560384	0.032857
Bomo_Chr11	572782	573544	KWMTBOMO06110	562085	0.032851
Bomo_Chr11	575183	576092	KWMTBOMO06109	560384	0.026792
Bomo_Chr11	575183	576092	KWMTBOMO06110	562085	0.026788
Bomo_Chr11	748285	749252	KWMTBOMO06122	729374	0.023148
Bomo_Chr11	748285	749252	KWMTBOMO06123	729925	0.023147
Bomo_Chr11	748285	749252	KWMTBOMO06124	753204	0.043667
Bomo_Chr11	748285	749252	KWMTBOMO06125	753485	0.043658
Bomo_Chr11	749844	751468	KWMTBOMO06124	753204	0.036193
Bomo_Chr11	749844	751468	KWMTBOMO06125	753485	0.036186
Bomo_Chr11	789065	790576	KWMTBOMO06126	791454	0.021091
Bomo_Chr11	818712	819862	KWMTBOMO06128	807535	0.029083
Bomo_Chr11	854398	855309	KWMTBOMO06130	868324	0.023921
Bomo_Chr11	924607	925637	KWMTBOMO06135	926264	0.029579
Bomo_Chr11	934786	935758	KWMTBOMO06135	926264	0.031339
Bomo_Chr11	934786	935758	KWMTBOMO06137	946704	0.025478
Bomo_Chr11	936094	937358	KWMTBOMO06135	926264	0.046062
Bomo_Chr11	936094	937358	KWMTBOMO06137	946704	0.037447
Bomo_Chr11	936094	937358	KWMTBOMO06138	952175	0.020889
Bomo_Chr11	972195	973696	KWMTBOMO06139	981705	0.023868
Bomo_Chr11	977693	979515	KWMTBOMO06139	981705	0.023196
Bomo_Chr11	991691	992596	KWMTBOMO06140	1001255	0.020934
Bomo_Chr11	1007750	1009768	KWMTBOMO06139	981705	0.021956
Bomo_Chr11	1007750	1009768	KWMTBOMO06140	1001255	0.040029
Bomo_Chr11	1064688	1066519	KWMTBOMO06142	1182843	0.031984
Bomo_Chr11	1121570	1122070	KWMTBOMO06141	1128094	0.021924
Bomo_Chr11	1122349	1122849	KWMTBOMO06141	1128094	0.030934
Bomo_Chr11	1122902	1123402	KWMTBOMO06141	1128094	0.021105
Bomo_Chr11	1123939	1124786	KWMTBOMO06141	1128094	0.034606
Bomo_Chr11	1125343	1126095	KWMTBOMO06141	1128094	0.039206
Bomo_Chr11	1136360	1137889	KWMTBOMO06141	1128094	0.040757
Bomo_Chr11	1175454	1177022	KWMTBOMO06142	1182843	0.029698
Bomo_Chr11	1206596	1207892	KWMTBOMO06143	1220923	0.027158
Bomo_Chr11	1206596	1207892	KWMTBOMO06144	1221754	0.027157
Bomo_Chr11	1210953	1211822	KWMTBOMO06143	1220923	0.024311
Bomo_Chr11	1210953	1211822	KWMTBOMO06144	1221754	0.02431
Bomo_Chr11	1213340	1214509	KWMTBOMO06143	1220923	0.030414
Bomo_Chr11	1213340	1214509	KWMTBOMO06144	1221754	0.030412
Bomo_Chr11	1237152	1238438	KWMTBOMO06143	1220923	0.025051
Bomo_Chr11	1237152	1238438	KWMTBOMO06144	1221754	0.025049
Bomo_Chr11	1371704	1372495	KWMTBOMO06148	1383394	0.02319
Bomo_Chr11	1457105	1458342	KWMTBOMO06152	1454464	0.025075
Bomo_Chr11	1607559	1608333	KWMTBOMO06159	1602821	0.022878
Bomo_Chr11	1609744	1611686	KWMTBOMO06159	1602821	0.049284
Bomo_Chr11	1687335	1688462	KWMTBOMO06160	1663650	0.027869
Bomo_Chr11	1687335	1688462	KWMTBOMO06161	1671701	0.032511
Bomo_Chr11	1687335	1688462	KWMTBOMO06162	1681091	0.046249
Bomo_Chr11	1687335	1688462	KWMTBOMO06163	1689921	0.046231
Bomo_Chr11	1687335	1688462	KWMTBOMO06164	1693910	0.046716
Bomo_Chr11	1702012	1702826	KWMTBOMO06164	1693910	0.020373
Bomo_Chr11	1702012	1702826	KWMTBOMO06165	1716810	0.029479
Bomo_Chr11	1702012	1702826	KWMTBOMO06166	1725151	0.022133
Bomo_Chr11	1703557	1704685	KWMTBOMO06160	1663650	0.022002
Bomo_Chr11	1703557	1704685	KWMTBOMO06161	1671701	0.024801
Bomo_Chr11	1703557	1704685	KWMTBOMO06162	1681091	0.039337
Bomo_Chr11	1703557	1704685	KWMTBOMO06163	1689921	0.039321
Bomo_Chr11	1703557	1704685	KWMTBOMO06164	1693910	0.044059
Bomo_Chr11	1703557	1704685	KWMTBOMO06165	1716810	0.063754
Bomo_Chr11	1703557	1704685	KWMTBOMO06166	1725151	0.047867
Bomo_Chr11	1723006	1724036	KWMTBOMO06165	1716810	0.045636
Bomo_Chr11	1723006	1724036	KWMTBOMO06166	1725151	0.046106
Bomo_Chr11	1732800	1734061	KWMTBOMO06164	1693910	0.022562
Bomo_Chr11	1732800	1734061	KWMTBOMO06165	1716810	0.024816
Bomo_Chr11	1732800	1734061	KWMTBOMO06166	1725151	0.030627
Bomo_Chr11	1869805	1871186	KWMTBOMO06169	1866510	0.040707
Bomo_Chr11	1869805	1871186	KWMTBOMO06170	1868531	0.040703
Bomo_Chr11	1869805	1871186	KWMTBOMO06171	1879300	0.047896
Bomo_Chr11	1869805	1871186	KWMTBOMO06172	1880301	0.048984
Bomo_Chr11	1869805	1871186	KWMTBOMO06173	1891780	0.02703
Bomo_Chr11	1869805	1871186	KWMTBOMO06174	1893381	0.027028
Bomo_Chr11	1964490	1965557	KWMTBOMO06180	1963630	0.024122
Bomo_Chr11	1964490	1965557	KWMTBOMO06181	1970250	0.023718
Bomo_Chr11	1964490	1965557	KWMTBOMO06182	1971591	0.023715
Bomo_Chr11	1996347	1997076	KWMTBOMO06181	1970250	0.022282
Bomo_Chr11	1996347	1997076	KWMTBOMO06182	1971591	0.022279
Bomo_Chr11	1996347	1997076	KWMTBOMO06183	1994500	0.041686
Bomo_Chr11	1996347	1997076	KWMTBOMO06184	2004830	0.030143
Bomo_Chr11	1996347	1997076	KWMTBOMO06185	2006551	0.030141
Bomo_Chr11	2024694	2025334	KWMTBOMO06186	2012971	0.02007
Bomo_Chr11	2024694	2025334	KWMTBOMO06187	2027460	0.02034
Bomo_Chr11	2040161	2042898	KWMTBOMO06187	2027460	0.021215
Bomo_Chr11	2040161	2042898	KWMTBOMO06188	2031911	0.087995
Bomo_Chr11	2040161	2042898	KWMTBOMO06189	2060941	0.04681
Bomo_Chr11	2040161	2042898	KWMTBOMO06190	2076900	0.025241
Bomo_Chr11	2040161	2042898	KWMTBOMO06191	2089710	0.032205
Bomo_Chr11	2157167	2158269	KWMTBOMO06195	2169130	0.023881
Bomo_Chr11	2157167	2158269	KWMTBOMO06196	2169581	0.023881
Bomo_Chr11	2201299	2202988	KWMTBOMO06197	2208331	0.033916
Bomo_Chr11	2201299	2202988	KWMTBOMO06198	2217710	0.033913
Bomo_Chr11	2203417	2204584	KWMTBOMO06197	2208331	0.021693
Bomo_Chr11	2203417	2204584	KWMTBOMO06198	2217710	0.021691
Bomo_Chr11	2365906	2366532	KWMTBOMO06203	2335611	0.021873
Bomo_Chr11	2365906	2366532	KWMTBOMO06204	2361770	0.052001
Bomo_Chr11	2365906	2366532	KWMTBOMO06205	2363401	0.052
Bomo_Chr11	2365906	2366532	KWMTBOMO06206	2381481	0.026925
Bomo_Chr11	2371431	2372733	KWMTBOMO06204	2361770	0.02927
Bomo_Chr11	2371431	2372733	KWMTBOMO06205	2363401	0.02927
Bomo_Chr11	2371431	2372733	KWMTBOMO06206	2381481	0.028951
Bomo_Chr11	2376585	2377612	KWMTBOMO06204	2361770	0.041316
Bomo_Chr11	2376585	2377612	KWMTBOMO06205	2363401	0.041315
Bomo_Chr11	2376585	2377612	KWMTBOMO06206	2381481	0.040865
Bomo_Chr11	2376585	2377612	KWMTBOMO06207	2399000	0.021918
Bomo_Chr11	2376585	2377612	KWMTBOMO06208	2399601	0.021918
Bomo_Chr11	2378283	2379587	KWMTBOMO06204	2361770	0.043548
Bomo_Chr11	2378283	2379587	KWMTBOMO06205	2363401	0.043547
Bomo_Chr11	2378283	2379587	KWMTBOMO06206	2381481	0.043073
Bomo_Chr11	2378283	2379587	KWMTBOMO06207	2399000	0.023102
Bomo_Chr11	2378283	2379587	KWMTBOMO06208	2399601	0.023102
Bomo_Chr11	2380218	2380959	KWMTBOMO06204	2361770	0.021975
Bomo_Chr11	2380218	2380959	KWMTBOMO06205	2363401	0.021975
Bomo_Chr11	2380218	2380959	KWMTBOMO06206	2381481	0.042822
Bomo_Chr11	2380218	2380959	KWMTBOMO06207	2399000	0.046244
Bomo_Chr11	2380218	2380959	KWMTBOMO06208	2399601	0.046244
Bomo_Chr11	2492654	2493929	KWMTBOMO06211	2480983	0.030831
Bomo_Chr11	2492654	2493929	KWMTBOMO06212	2487853	0.030827
Bomo_Chr11	2492654	2493929	KWMTBOMO06213	2500422	0.036187
Bomo_Chr11	2492654	2493929	KWMTBOMO06214	2512042	0.021817
Bomo_Chr11	2492654	2493929	KWMTBOMO06215	2518373	0.021815
Bomo_Chr11	2529115	2530767	KWMTBOMO06216	2534733	0.020185
Bomo_Chr11	2592901	2593676	KWMTBOMO06217	2572043	0.024167
Bomo_Chr11	2597450	2598629	KWMTBOMO06217	2572043	0.021259
Bomo_Chr11	2687732	2689489	KWMTBOMO06218	2648782	0.020107
Bomo_Chr11	2687732	2689489	KWMTBOMO06219	2651013	0.020034
Bomo_Chr11	2687732	2689489	KWMTBOMO06220	2672432	0.04292
Bomo_Chr11	2831883	2833090	KWMTBOMO06225	2846893	0.024887
Bomo_Chr11	2844468	2845312	KWMTBOMO06225	2846893	0.027248
Bomo_Chr11	2879338	2880144	KWMTBOMO06226	2877752	0.021915
Bomo_Chr11	2880247	2882047	KWMTBOMO06226	2877752	0.029703
Bomo_Chr11	2927445	2928290	KWMTBOMO06227	2921042	0.027134
Bomo_Chr11	2940518	2942868	KWMTBOMO06227	2921042	0.053565
Bomo_Chr11	2940518	2942868	KWMTBOMO06228	2979244	0.040199
Bomo_Chr11	2940518	2942868	KWMTBOMO06229	2982595	0.028208
Bomo_Chr11	2959529	2960743	KWMTBOMO06228	2979244	0.020287
Bomo_Chr11	2980531	2981932	KWMTBOMO06226	2877752	0.021995
Bomo_Chr11	2980531	2981932	KWMTBOMO06227	2921042	0.02085
Bomo_Chr11	2980531	2981932	KWMTBOMO06228	2979244	0.056694
Bomo_Chr11	2980531	2981932	KWMTBOMO06229	2982595	0.073646
Bomo_Chr11	2994360	2995491	KWMTBOMO06229	2982595	0.020147
Bomo_Chr11	3009300	3010851	KWMTBOMO06230	3026124	0.036874
Bomo_Chr11	3009300	3010851	KWMTBOMO06231	3032255	0.02207
Bomo_Chr11	3133032	3134066	KWMTBOMO06238	3142044	0.022796
Bomo_Chr11	3133032	3134066	KWMTBOMO06239	3144355	0.022794
Bomo_Chr11	3195887	3197284	KWMTBOMO06243	3181954	0.034454
Bomo_Chr11	3195887	3197284	KWMTBOMO06244	3182175	0.034454
Bomo_Chr11	3202384	3204560	KWMTBOMO06242	3175045	0.020953
Bomo_Chr11	3202384	3204560	KWMTBOMO06243	3181954	0.029472
Bomo_Chr11	3202384	3204560	KWMTBOMO06244	3182175	0.029472
Bomo_Chr11	3202384	3204560	KWMTBOMO06245	3223084	0.034128
Bomo_Chr11	3202384	3204560	KWMTBOMO06246	3239235	0.029187
Bomo_Chr11	3210116	3211446	KWMTBOMO06245	3223084	0.050341
Bomo_Chr11	3210116	3211446	KWMTBOMO06246	3239235	0.030256
Bomo_Chr11	3211460	3212283	KWMTBOMO06245	3223084	0.027645
Bomo_Chr11	3217736	3219186	KWMTBOMO06245	3223084	0.025422
Bomo_Chr11	3226743	3227655	KWMTBOMO06245	3223084	0.071526
Bomo_Chr11	3226743	3227655	KWMTBOMO06246	3239235	0.062857
Bomo_Chr11	3229042	3230318	KWMTBOMO06245	3223084	0.060835
Bomo_Chr11	3229042	3230318	KWMTBOMO06246	3239235	0.053461
Bomo_Chr11	3231783	3232283	KWMTBOMO06245	3223084	0.028495
Bomo_Chr11	3231783	3232283	KWMTBOMO06246	3239235	0.030291
Bomo_Chr11	3232507	3233394	KWMTBOMO06242	3175045	0.020815
Bomo_Chr11	3232507	3233394	KWMTBOMO06243	3181954	0.023194
Bomo_Chr11	3232507	3233394	KWMTBOMO06244	3182175	0.023194
Bomo_Chr11	3232507	3233394	KWMTBOMO06245	3223084	0.091203
Bomo_Chr11	3232507	3233394	KWMTBOMO06246	3239235	0.096951
Bomo_Chr11	3232507	3233394	KWMTBOMO06247	3269134	0.037842
Bomo_Chr11	3232507	3233394	KWMTBOMO06248	3270375	0.023154
Bomo_Chr11	3233657	3234620	KWMTBOMO06245	3223084	0.063367
Bomo_Chr11	3233657	3234620	KWMTBOMO06246	3239235	0.067361
Bomo_Chr11	3233657	3234620	KWMTBOMO06247	3269134	0.026292
Bomo_Chr11	3377485	3379146	KWMTBOMO06254	3381155	0.037486
Bomo_Chr11	3377485	3379146	KWMTBOMO06255	3382416	0.037484
Bomo_Chr11	3441935	3443766	KWMTBOMO06261	3449635	0.021856
Bomo_Chr11	3477217	3478755	KWMTBOMO06262	3476436	0.027513
Bomo_Chr11	3533680	3534471	KWMTBOMO06265	3538636	0.022172
Bomo_Chr11	3704101	3705139	KWMTBOMO06276	3706245	0.024988
Bomo_Chr11	3707075	3707761	KWMTBOMO06276	3706245	0.026914
Bomo_Chr11	3735243	3736573	KWMTBOMO06277	3722336	0.030711
Bomo_Chr11	3735243	3736573	KWMTBOMO06279	3732786	0.03118
Bomo_Chr11	4130299	4131628	KWMTBOMO06291	4132261	0.022083
Bomo_Chr11	4221831	4222788	KWMTBOMO06297	4249241	0.022711
Bomo_Chr11	4222995	4224726	KWMTBOMO06297	4249241	0.021648
Bomo_Chr11	4253210	4254077	KWMTBOMO06297	4249241	0.036345
Bomo_Chr11	4253210	4254077	KWMTBOMO06298	4250542	0.039752
Bomo_Chr11	4253210	4254077	KWMTBOMO06299	4254802	0.039746
Bomo_Chr11	4391512	4392696	KWMTBOMO06303	4393242	0.043959
Bomo_Chr11	4391512	4392696	KWMTBOMO06304	4398192	0.043948
Bomo_Chr11	4395471	4395971	KWMTBOMO06303	4393242	0.022196
Bomo_Chr11	4395471	4395971	KWMTBOMO06304	4398192	0.02219
Bomo_Chr11	4407269	4407790	KWMTBOMO06303	4393242	0.04354
Bomo_Chr11	4407269	4407790	KWMTBOMO06304	4398192	0.04353
Bomo_Chr11	4407269	4407790	KWMTBOMO06305	4429451	0.022986
Bomo_Chr11	4408537	4409037	KWMTBOMO06303	4393242	0.031874
Bomo_Chr11	4408537	4409037	KWMTBOMO06304	4398192	0.031866
Bomo_Chr11	4425011	4426134	KWMTBOMO06305	4429451	0.03586
Bomo_Chr11	4435966	4436899	KWMTBOMO06305	4429451	0.025354
Bomo_Chr11	4435966	4436899	KWMTBOMO06306	4437702	0.045696
Bomo_Chr11	4458264	4459304	KWMTBOMO06306	4437702	0.021378
Bomo_Chr11	4511394	4512821	KWMTBOMO06305	4429451	0.043378
Bomo_Chr11	4511394	4512821	KWMTBOMO06306	4437702	0.047273
Bomo_Chr11	4511394	4512821	KWMTBOMO06307	4499561	0.088482
Bomo_Chr11	4511394	4512821	KWMTBOMO06308	4501272	0.139886
Bomo_Chr11	4511394	4512821	KWMTBOMO06497	9157290	0.119365
Bomo_Chr11	4512867	4513558	KWMTBOMO06305	4429451	0.027438
Bomo_Chr11	4512867	4513558	KWMTBOMO06306	4437702	0.029903
Bomo_Chr11	4512867	4513558	KWMTBOMO06307	4499561	0.055969
Bomo_Chr11	4512867	4513558	KWMTBOMO06308	4501272	0.088484
Bomo_Chr11	4512867	4513558	KWMTBOMO06497	9157290	0.075504
Bomo_Chr11	4514339	4514839	KWMTBOMO06308	4501272	0.031325
Bomo_Chr11	4514339	4514839	KWMTBOMO06497	9157290	0.02673
Bomo_Chr11	4515704	4516286	KWMTBOMO06308	4501272	0.02366
Bomo_Chr11	4515704	4516286	KWMTBOMO06497	9157290	0.020189
Bomo_Chr11	4563132	4565157	KWMTBOMO06310	4567792	0.029765
Bomo_Chr11	4652435	4652935	KWMTBOMO06315	4649802	0.027303
Bomo_Chr11	4652435	4652935	KWMTBOMO06316	4651873	0.028236
Bomo_Chr11	4940235	4941576	KWMTBOMO06332	4890072	0.020526
Bomo_Chr11	4940235	4941576	KWMTBOMO06333	4891203	0.020525
Bomo_Chr11	4940235	4941576	KWMTBOMO06334	4910553	0.026292
Bomo_Chr11	4940235	4941576	KWMTBOMO06335	4942573	0.068365
Bomo_Chr11	4940235	4941576	KWMTBOMO06336	4993492	0.026222
Bomo_Chr11	4954522	4955198	KWMTBOMO06335	4942573	0.022701
Bomo_Chr11	4956250	4957067	KWMTBOMO06335	4942573	0.023812
Bomo_Chr11	4959147	4960003	KWMTBOMO06335	4942573	0.037476
Bomo_Chr11	4960835	4962087	KWMTBOMO06332	4890072	0.02047
Bomo_Chr11	4960835	4962087	KWMTBOMO06333	4891203	0.020469
Bomo_Chr11	4960835	4962087	KWMTBOMO06334	4910553	0.024721
Bomo_Chr11	4960835	4962087	KWMTBOMO06335	4942573	0.062178
Bomo_Chr11	4960835	4962087	KWMTBOMO06336	4993492	0.031077
Bomo_Chr11	4963950	4964534	KWMTBOMO06335	4942573	0.046769
Bomo_Chr11	4963950	4964534	KWMTBOMO06336	4993492	0.023375
Bomo_Chr11	4964578	4965078	KWMTBOMO06335	4942573	0.035846
Bomo_Chr11	5087379	5088972	KWMTBOMO06343	5073366	0.023036
Bomo_Chr11	5087379	5088972	KWMTBOMO06344	5086386	0.026088
Bomo_Chr11	5087379	5088972	KWMTBOMO06345	5094936	0.027629
Bomo_Chr11	5087379	5088972	KWMTBOMO06346	5096237	0.027628
Bomo_Chr11	5130806	5131995	KWMTBOMO06348	5138466	0.024053
Bomo_Chr11	5150888	5152206	KWMTBOMO06349	5158097	0.035047
Bomo_Chr11	5483114	5484203	KWMTBOMO06356	5486358	0.026609
Bomo_Chr11	5642239	5642902	KWMTBOMO06359	5647278	0.02417
Bomo_Chr11	5663808	5664949	KWMTBOMO06360	5668847	0.02071
Bomo_Chr11	5713115	5715830	KWMTBOMO06361	5708008	0.036583
Bomo_Chr11	5782030	5783954	KWMTBOMO06362	5771870	0.028593
Bomo_Chr11	5782030	5783954	KWMTBOMO06363	5776780	0.028594
Bomo_Chr11	5782030	5783954	KWMTBOMO06364	5777011	0.028594
Bomo_Chr11	5782030	5783954	KWMTBOMO06365	5784621	0.030192
Bomo_Chr11	6318388	6320955	KWMTBOMO06147	1357184	0.022759
Bomo_Chr11	6318388	6320955	KWMTBOMO06150	1409724	0.020623
Bomo_Chr11	6318388	6320955	KWMTBOMO06165	1716810	0.02268
Bomo_Chr11	6318388	6320955	KWMTBOMO06177	1928021	0.022592
Bomo_Chr11	6318388	6320955	KWMTBOMO06191	2089710	0.024704
Bomo_Chr11	6318388	6320955	KWMTBOMO06203	2335611	0.027703
Bomo_Chr11	6318388	6320955	KWMTBOMO06207	2399000	0.020093
Bomo_Chr11	6318388	6320955	KWMTBOMO06208	2399601	0.020094
Bomo_Chr11	6318388	6320955	KWMTBOMO06209	2416321	0.024053
Bomo_Chr11	6318388	6320955	KWMTBOMO06217	2572043	0.021067
Bomo_Chr11	6318388	6320955	KWMTBOMO06218	2648782	0.021595
Bomo_Chr11	6318388	6320955	KWMTBOMO06224	2807993	0.02191
Bomo_Chr11	6318388	6320955	KWMTBOMO06231	3032255	0.020103
Bomo_Chr11	6318388	6320955	KWMTBOMO06233	3063434	0.071958
Bomo_Chr11	6318388	6320955	KWMTBOMO06234	3073044	0.023642
Bomo_Chr11	6318388	6320955	KWMTBOMO06235	3093434	0.027057
Bomo_Chr11	6318388	6320955	KWMTBOMO06236	3099274	0.027076
Bomo_Chr11	6318388	6320955	KWMTBOMO06237	3101965	0.025862
Bomo_Chr11	6318388	6320955	KWMTBOMO06240	3152235	0.020563
Bomo_Chr11	6318388	6320955	KWMTBOMO06246	3239235	0.020514
Bomo_Chr11	6318388	6320955	KWMTBOMO06248	3270375	0.020002
Bomo_Chr11	6318388	6320955	KWMTBOMO06249	3324774	0.023978
Bomo_Chr11	6318388	6320955	KWMTBOMO06250	3345094	0.020716
Bomo_Chr11	6318388	6320955	KWMTBOMO06251	3345995	0.02072
Bomo_Chr11	6318388	6320955	KWMTBOMO06254	3381155	0.021685
Bomo_Chr11	6318388	6320955	KWMTBOMO06255	3382416	0.021692
Bomo_Chr11	6318388	6320955	KWMTBOMO06256	3407335	0.029892
Bomo_Chr11	6318388	6320955	KWMTBOMO06257	3408176	0.029897
Bomo_Chr11	6318388	6320955	KWMTBOMO06258	3410435	0.022903
Bomo_Chr11	6318388	6320955	KWMTBOMO06259	3411896	0.022911
Bomo_Chr11	6318388	6320955	KWMTBOMO06261	3449635	0.024269
Bomo_Chr11	6318388	6320955	KWMTBOMO06262	3476436	0.025309
Bomo_Chr11	6318388	6320955	KWMTBOMO06265	3538636	0.0249
Bomo_Chr11	6318388	6320955	KWMTBOMO06269	3590615	0.036574
Bomo_Chr11	6318388	6320955	KWMTBOMO06270	3594606	0.036602
Bomo_Chr11	6318388	6320955	KWMTBOMO06273	3649165	0.026813
Bomo_Chr11	6318388	6320955	KWMTBOMO06276	3706245	0.024042
Bomo_Chr11	6318388	6320955	KWMTBOMO06277	3722336	0.023954
Bomo_Chr11	6318388	6320955	KWMTBOMO06279	3732786	0.039189
Bomo_Chr11	6318388	6320955	KWMTBOMO06286	4014230	0.037145
Bomo_Chr11	6318388	6320955	KWMTBOMO06287	4015221	0.03715
Bomo_Chr11	6318388	6320955	KWMTBOMO06288	4036060	0.029652
Bomo_Chr11	6318388	6320955	KWMTBOMO06289	4042060	0.030594
Bomo_Chr11	6318388	6320955	KWMTBOMO06290	4049101	0.030666
Bomo_Chr11	6318388	6320955	KWMTBOMO06291	4132261	0.02792
Bomo_Chr11	6318388	6320955	KWMTBOMO06293	4167030	0.031055
Bomo_Chr11	6318388	6320955	KWMTBOMO06294	4177790	0.029611
Bomo_Chr11	6318388	6320955	KWMTBOMO06296	4207820	0.03851
Bomo_Chr11	6318388	6320955	KWMTBOMO06297	4249241	0.041574
Bomo_Chr11	6318388	6320955	KWMTBOMO06298	4250542	0.025461
Bomo_Chr11	6318388	6320955	KWMTBOMO06299	4254802	0.025503
Bomo_Chr11	6318388	6320955	KWMTBOMO06300	4327011	0.028512
Bomo_Chr11	6318388	6320955	KWMTBOMO06301	4330292	0.029059
Bomo_Chr11	6318388	6320955	KWMTBOMO06303	4393242	0.027114
Bomo_Chr11	6318388	6320955	KWMTBOMO06304	4398192	0.027168
Bomo_Chr11	6318388	6320955	KWMTBOMO06305	4429451	0.026208
Bomo_Chr11	6318388	6320955	KWMTBOMO06306	4437702	0.026157
Bomo_Chr11	6318388	6320955	KWMTBOMO06307	4499561	0.035742
Bomo_Chr11	6318388	6320955	KWMTBOMO06308	4501272	0.025244
Bomo_Chr11	6318388	6320955	KWMTBOMO06310	4567792	0.039138
Bomo_Chr11	6318388	6320955	KWMTBOMO06311	4584992	0.027654
Bomo_Chr11	6318388	6320955	KWMTBOMO06312	4619883	0.046965
Bomo_Chr11	6318388	6320955	KWMTBOMO06313	4625053	0.03457
Bomo_Chr11	6318388	6320955	KWMTBOMO06314	4631633	0.043783
Bomo_Chr11	6318388	6320955	KWMTBOMO06315	4649802	0.036778
Bomo_Chr11	6318388	6320955	KWMTBOMO06316	4651873	0.023374
Bomo_Chr11	6318388	6320955	KWMTBOMO06317	4695272	0.038298
Bomo_Chr11	6318388	6320955	KWMTBOMO06318	4697563	0.038326
Bomo_Chr11	6318388	6320955	KWMTBOMO06319	4727993	0.045247
Bomo_Chr11	6318388	6320955	KWMTBOMO06320	4744462	0.056256
Bomo_Chr11	6318388	6320955	KWMTBOMO06321	4750203	0.035117
Bomo_Chr11	6318388	6320955	KWMTBOMO06322	4764442	0.041213
Bomo_Chr11	6318388	6320955	KWMTBOMO06323	4770343	0.042082
Bomo_Chr11	6318388	6320955	KWMTBOMO06324	4790903	0.040386
Bomo_Chr11	6318388	6320955	KWMTBOMO06325	4797813	0.040495
Bomo_Chr11	6318388	6320955	KWMTBOMO06326	4804843	0.048393
Bomo_Chr11	6318388	6320955	KWMTBOMO06327	4840872	0.038715
Bomo_Chr11	6318388	6320955	KWMTBOMO06328	4851572	0.034592
Bomo_Chr11	6318388	6320955	KWMTBOMO06329	4852193	0.034601
Bomo_Chr11	6318388	6320955	KWMTBOMO06330	4875872	0.034601
Bomo_Chr11	6318388	6320955	KWMTBOMO06331	4876063	0.034604
Bomo_Chr11	6318388	6320955	KWMTBOMO06332	4890072	0.037809
Bomo_Chr11	6318388	6320955	KWMTBOMO06333	4891203	0.037825
Bomo_Chr11	6318388	6320955	KWMTBOMO06334	4910553	0.037931
Bomo_Chr11	6318388	6320955	KWMTBOMO06335	4942573	0.02172
Bomo_Chr11	6318388	6320955	KWMTBOMO06336	4993492	0.034582
Bomo_Chr11	6318388	6320955	KWMTBOMO06337	5024457	0.037607
Bomo_Chr11	6318388	6320955	KWMTBOMO06338	5035807	0.042536
Bomo_Chr11	6318388	6320955	KWMTBOMO06339	5040827	0.028114
Bomo_Chr11	6318388	6320955	KWMTBOMO06340	5051007	0.034639
Bomo_Chr11	6318388	6320955	KWMTBOMO06341	5057397	0.034756
Bomo_Chr11	6318388	6320955	KWMTBOMO06343	5073366	0.036775
Bomo_Chr11	6318388	6320955	KWMTBOMO06344	5086386	0.04069
Bomo_Chr11	6318388	6320955	KWMTBOMO06345	5094936	0.036726
Bomo_Chr11	6318388	6320955	KWMTBOMO06346	5096237	0.036751
Bomo_Chr11	6318388	6320955	KWMTBOMO06347	5115356	0.04788
Bomo_Chr11	6318388	6320955	KWMTBOMO06348	5138466	0.036014
Bomo_Chr11	6318388	6320955	KWMTBOMO06349	5158097	0.055002
Bomo_Chr11	6318388	6320955	KWMTBOMO06352	5202437	0.076203
Bomo_Chr11	6318388	6320955	KWMTBOMO06353	5394827	0.063915
Bomo_Chr11	6318388	6320955	KWMTBOMO06354	5424687	0.048042
Bomo_Chr11	6318388	6320955	KWMTBOMO06355	5468117	0.04138
Bomo_Chr11	6318388	6320955	KWMTBOMO06356	5486358	0.031098
Bomo_Chr11	6318388	6320955	KWMTBOMO06359	5647278	0.035911
Bomo_Chr11	6318388	6320955	KWMTBOMO06360	5668847	0.044504
Bomo_Chr11	6318388	6320955	KWMTBOMO06361	5708008	0.052792
Bomo_Chr11	6318388	6320955	KWMTBOMO06362	5771870	0.039388
Bomo_Chr11	6318388	6320955	KWMTBOMO06363	5776780	0.039389
Bomo_Chr11	6318388	6320955	KWMTBOMO06364	5777011	0.039389
Bomo_Chr11	6318388	6320955	KWMTBOMO06365	5784621	0.043473
Bomo_Chr11	6318388	6320955	KWMTBOMO06366	5800310	0.060661
Bomo_Chr11	6318388	6320955	KWMTBOMO06367	5806890	0.060659
Bomo_Chr11	6318388	6320955	KWMTBOMO06368	5885951	0.074736
Bomo_Chr11	6318388	6320955	KWMTBOMO06369	5912820	0.049354
Bomo_Chr11	6318388	6320955	KWMTBOMO06370	5913601	0.049355
Bomo_Chr11	6318388	6320955	KWMTBOMO06371	5917960	0.049353
Bomo_Chr11	6318388	6320955	KWMTBOMO06372	5918651	0.049351
Bomo_Chr11	6318388	6320955	KWMTBOMO06373	5923761	0.063593
Bomo_Chr11	6318388	6320955	KWMTBOMO06374	5936660	0.04933
Bomo_Chr11	6318388	6320955	KWMTBOMO06375	5938021	0.049336
Bomo_Chr11	6318388	6320955	KWMTBOMO06376	5942740	0.06942
Bomo_Chr11	6318388	6320955	KWMTBOMO06377	5944611	0.069419
Bomo_Chr11	6318388	6320955	KWMTBOMO06378	5960290	0.077009
Bomo_Chr11	6318388	6320955	KWMTBOMO06379	5962211	0.077012
Bomo_Chr11	6318388	6320955	KWMTBOMO06380	5969911	0.077009
Bomo_Chr11	6318388	6320955	KWMTBOMO06381	5973360	0.076405
Bomo_Chr11	6318388	6320955	KWMTBOMO06382	5974301	0.076401
Bomo_Chr11	6318388	6320955	KWMTBOMO06383	6035841	0.102848
Bomo_Chr11	6318388	6320955	KWMTBOMO06384	6090951	0.243104
Bomo_Chr11	6318388	6320955	KWMTBOMO06385	6095641	0.243066
Bomo_Chr11	6318388	6320955	KWMTBOMO06386	6100361	0.224097
Bomo_Chr11	6318388	6320955	KWMTBOMO06389	6120460	0.210426
Bomo_Chr11	6318388	6320955	KWMTBOMO06390	6124280	0.210468
Bomo_Chr11	6318388	6320955	KWMTBOMO06397	6342531	0.351127
Bomo_Chr11	6318388	6320955	KWMTBOMO06398	6370780	0.259813
Bomo_Chr11	6318388	6320955	KWMTBOMO06399	6378130	0.259835
Bomo_Chr11	6318388	6320955	KWMTBOMO06400	6381101	0.287227
Bomo_Chr11	6318388	6320955	KWMTBOMO06401	6461301	0.117379
Bomo_Chr11	6318388	6320955	KWMTBOMO06402	6473080	0.137522
Bomo_Chr11	6318388	6320955	KWMTBOMO06403	6473631	0.137521
Bomo_Chr11	6318388	6320955	KWMTBOMO06404	6484960	0.096709
Bomo_Chr11	6318388	6320955	KWMTBOMO06405	6495950	0.102286
Bomo_Chr11	6318388	6320955	KWMTBOMO06406	6497151	0.102285
Bomo_Chr11	6318388	6320955	KWMTBOMO06407	6516170	0.148344
Bomo_Chr11	6318388	6320955	KWMTBOMO06408	6520521	0.143977
Bomo_Chr11	6318388	6320955	KWMTBOMO06410	6573300	0.187457
Bomo_Chr11	6318388	6320955	KWMTBOMO06411	6583641	0.192499
Bomo_Chr11	6318388	6320955	KWMTBOMO06413	6751210	0.219111
Bomo_Chr11	6318388	6320955	KWMTBOMO06417	6810971	0.230717
Bomo_Chr11	6318388	6320955	KWMTBOMO06418	6829140	0.131366
Bomo_Chr11	6318388	6320955	KWMTBOMO06419	6829311	0.131367
Bomo_Chr11	6318388	6320955	KWMTBOMO06421	6869470	0.128643
Bomo_Chr11	6318388	6320955	KWMTBOMO06422	6869931	0.128645
Bomo_Chr11	6318388	6320955	KWMTBOMO06426	6929400	0.071666
Bomo_Chr11	6318388	6320955	KWMTBOMO06427	6932651	0.083219
Bomo_Chr11	6318388	6320955	KWMTBOMO06428	6943771	0.111992
Bomo_Chr11	6318388	6320955	KWMTBOMO06429	6970651	0.065736
Bomo_Chr11	6318388	6320955	KWMTBOMO06430	6983900	0.072595
Bomo_Chr11	6318388	6320955	KWMTBOMO06431	6984951	0.072598
Bomo_Chr11	6318388	6320955	KWMTBOMO06432	7030700	0.062047
Bomo_Chr11	6318388	6320955	KWMTBOMO06433	7076850	0.067302
Bomo_Chr11	6318388	6320955	KWMTBOMO06434	7079491	0.067312
Bomo_Chr11	6318388	6320955	KWMTBOMO06435	7093820	0.07028
Bomo_Chr11	6318388	6320955	KWMTBOMO06436	7094071	0.07028
Bomo_Chr11	6318388	6320955	KWMTBOMO06437	7099420	0.070286
Bomo_Chr11	6318388	6320955	KWMTBOMO06438	7107750	0.06502
Bomo_Chr11	6318388	6320955	KWMTBOMO06439	7115520	0.100197
Bomo_Chr11	6318388	6320955	KWMTBOMO06440	7138060	0.087945
Bomo_Chr11	6318388	6320955	KWMTBOMO06441	7142061	0.062192
Bomo_Chr11	6318388	6320955	KWMTBOMO06442	7150420	0.116234
Bomo_Chr11	6318388	6320955	KWMTBOMO06446	7201491	0.11313
Bomo_Chr11	6318388	6320955	KWMTBOMO06448	7318350	0.112047
Bomo_Chr11	6318388	6320955	KWMTBOMO06450	7357651	0.083568
Bomo_Chr11	6318388	6320955	KWMTBOMO06451	7375121	0.091123
Bomo_Chr11	6318388	6320955	KWMTBOMO06452	7379941	0.091043
Bomo_Chr11	6318388	6320955	KWMTBOMO06453	7432970	0.063809
Bomo_Chr11	6318388	6320955	KWMTBOMO06454	7441240	0.05259
Bomo_Chr11	6318388	6320955	KWMTBOMO06455	7603381	0.080607
Bomo_Chr11	6318388	6320955	KWMTBOMO06456	7627010	0.050262
Bomo_Chr11	6318388	6320955	KWMTBOMO06457	7628831	0.050227
Bomo_Chr11	6318388	6320955	KWMTBOMO06458	7646491	0.042746
Bomo_Chr11	6318388	6320955	KWMTBOMO06460	7716471	0.051142
Bomo_Chr11	6318388	6320955	KWMTBOMO06461	7768190	0.039228
Bomo_Chr11	6318388	6320955	KWMTBOMO06462	7806810	0.040311
Bomo_Chr11	6318388	6320955	KWMTBOMO06463	7807281	0.040302
Bomo_Chr11	6318388	6320955	KWMTBOMO06467	7924181	0.05261
Bomo_Chr11	6318388	6320955	KWMTBOMO06469	7968411	0.060722
Bomo_Chr11	6318388	6320955	KWMTBOMO06470	7981550	0.073582
Bomo_Chr11	6318388	6320955	KWMTBOMO06471	8130661	0.061219
Bomo_Chr11	6318388	6320955	KWMTBOMO06473	8598050	0.028034
Bomo_Chr11	6318388	6320955	KWMTBOMO06474	8603781	0.022294
Bomo_Chr11	6318388	6320955	KWMTBOMO06475	8617170	0.022256
Bomo_Chr11	6318388	6320955	KWMTBOMO06476	8618671	0.022243
Bomo_Chr11	6318388	6320955	KWMTBOMO06477	8635770	0.022749
Bomo_Chr11	6318388	6320955	KWMTBOMO06479	8644000	0.021625
Bomo_Chr11	6318388	6320955	KWMTBOMO06480	8644791	0.021619
Bomo_Chr11	6318388	6320955	KWMTBOMO06481	8650060	0.026315
Bomo_Chr11	6318388	6320955	KWMTBOMO06482	8664840	0.028682
Bomo_Chr11	6318388	6320955	KWMTBOMO06487	8712270	0.028355
Bomo_Chr11	6318388	6320955	KWMTBOMO06488	8713051	0.02835
Bomo_Chr11	6318388	6320955	KWMTBOMO06489	8756180	0.022208
Bomo_Chr11	6318388	6320955	KWMTBOMO06490	8885134	0.022988
Bomo_Chr11	6318388	6320955	KWMTBOMO06491	8899995	0.021068
Bomo_Chr11	6318388	6320955	KWMTBOMO06496	9138330	0.02091
Bomo_Chr11	6318388	6320955	KWMTBOMO06501	9322500	0.02352
Bomo_Chr11	6318388	6320955	KWMTBOMO06509	9533879	0.024364
Bomo_Chr11	6318388	6320955	KWMTBOMO06511	9592960	0.024573
Bomo_Chr11	6318388	6320955	KWMTBOMO06516	9680740	0.031044
Bomo_Chr11	6318388	6320955	KWMTBOMO06522	9751289	0.020097
Bomo_Chr11	6318388	6320955	KWMTBOMO06523	9751730	0.020095
Bomo_Chr11	6318388	6320955	KWMTBOMO06524	9792719	0.021057
Bomo_Chr11	6318388	6320955	KWMTBOMO06525	9793030	0.021056
Bomo_Chr11	6318388	6320955	KWMTBOMO06528	9819729	0.033865
Bomo_Chr11	6318388	6320955	KWMTBOMO06529	9820890	0.029926
Bomo_Chr11	6318388	6320955	KWMTBOMO06531	9876419	0.027747
Bomo_Chr11	6318388	6320955	KWMTBOMO06532	9930599	0.020323
Bomo_Chr11	6318388	6320955	KWMTBOMO06534	9955589	0.021982
Bomo_Chr11	6318388	6320955	KWMTBOMO06538	10040169	0.034147
Bomo_Chr11	6318388	6320955	KWMTBOMO06539	10063015	0.021603
Bomo_Chr11	6318388	6320955	KWMTBOMO06540	10063495	0.021601
Bomo_Chr11	6318388	6320955	KWMTBOMO06541	10106624	0.021463
Bomo_Chr11	6318388	6320955	KWMTBOMO06542	10152354	0.022168
Bomo_Chr11	6318388	6320955	KWMTBOMO06546	10211285	0.022093
Bomo_Chr11	6318388	6320955	KWMTBOMO06547	10218464	0.022061
Bomo_Chr11	6318388	6320955	KWMTBOMO06548	10221455	0.021191
Bomo_Chr11	6318388	6320955	KWMTBOMO06549	10232354	0.021331
Bomo_Chr11	6318388	6320955	KWMTBOMO06550	10233485	0.021324
Bomo_Chr11	6318388	6320955	KWMTBOMO06551	10315544	0.021037
Bomo_Chr11	6318388	6320955	KWMTBOMO06557	10449765	0.030265
Bomo_Chr11	6318388	6320955	KWMTBOMO06560	10531554	0.020016
Bomo_Chr11	6318388	6320955	KWMTBOMO06570	10602565	0.020524
Bomo_Chr11	6318388	6320955	KWMTBOMO06588	11183742	0.022941
Bomo_Chr11	6321184	6322114	KWMTBOMO06180	1963630	0.020281
Bomo_Chr11	6321184	6322114	KWMTBOMO06188	2031911	0.020315
Bomo_Chr11	6321184	6322114	KWMTBOMO06231	3032255	0.023742
Bomo_Chr11	6321184	6322114	KWMTBOMO06233	3063434	0.023871
Bomo_Chr11	6321184	6322114	KWMTBOMO06248	3270375	0.020948
Bomo_Chr11	6321184	6322114	KWMTBOMO06250	3345094	0.031318
Bomo_Chr11	6321184	6322114	KWMTBOMO06251	3345995	0.031318
Bomo_Chr11	6321184	6322114	KWMTBOMO06277	3722336	0.022177
Bomo_Chr11	6321184	6322114	KWMTBOMO06279	3732786	0.024975
Bomo_Chr11	6321184	6322114	KWMTBOMO06286	4014230	0.030491
Bomo_Chr11	6321184	6322114	KWMTBOMO06287	4015221	0.030491
Bomo_Chr11	6321184	6322114	KWMTBOMO06291	4132261	0.025336
Bomo_Chr11	6321184	6322114	KWMTBOMO06294	4177790	0.026752
Bomo_Chr11	6321184	6322114	KWMTBOMO06296	4207820	0.024615
Bomo_Chr11	6321184	6322114	KWMTBOMO06308	4501272	0.021949
Bomo_Chr11	6321184	6322114	KWMTBOMO06312	4619883	0.02106
Bomo_Chr11	6321184	6322114	KWMTBOMO06313	4625053	0.02771
Bomo_Chr11	6321184	6322114	KWMTBOMO06315	4649802	0.050194
Bomo_Chr11	6321184	6322114	KWMTBOMO06316	4651873	0.057763
Bomo_Chr11	6321184	6322114	KWMTBOMO06317	4695272	0.023684
Bomo_Chr11	6321184	6322114	KWMTBOMO06318	4697563	0.023694
Bomo_Chr11	6321184	6322114	KWMTBOMO06320	4744462	0.025794
Bomo_Chr11	6321184	6322114	KWMTBOMO06326	4804843	0.031468
Bomo_Chr11	6321184	6322114	KWMTBOMO06327	4840872	0.029411
Bomo_Chr11	6321184	6322114	KWMTBOMO06336	4993492	0.02391
Bomo_Chr11	6321184	6322114	KWMTBOMO06337	5024457	0.02554
Bomo_Chr11	6321184	6322114	KWMTBOMO06340	5051007	0.025568
Bomo_Chr11	6321184	6322114	KWMTBOMO06341	5057397	0.025613
Bomo_Chr11	6321184	6322114	KWMTBOMO06344	5086386	0.027784
Bomo_Chr11	6321184	6322114	KWMTBOMO06349	5158097	0.024559
Bomo_Chr11	6321184	6322114	KWMTBOMO06353	5394827	0.020626
Bomo_Chr11	6321184	6322114	KWMTBOMO06354	5424687	0.022351
Bomo_Chr11	6321184	6322114	KWMTBOMO06362	5771870	0.022679
Bomo_Chr11	6321184	6322114	KWMTBOMO06363	5776780	0.02268
Bomo_Chr11	6321184	6322114	KWMTBOMO06364	5777011	0.02268
Bomo_Chr11	6321184	6322114	KWMTBOMO06366	5800310	0.021463
Bomo_Chr11	6321184	6322114	KWMTBOMO06367	5806890	0.021462
Bomo_Chr11	6321184	6322114	KWMTBOMO06368	5885951	0.02841
Bomo_Chr11	6321184	6322114	KWMTBOMO06369	5912820	0.021946
Bomo_Chr11	6321184	6322114	KWMTBOMO06370	5913601	0.021947
Bomo_Chr11	6321184	6322114	KWMTBOMO06371	5917960	0.021946
Bomo_Chr11	6321184	6322114	KWMTBOMO06372	5918651	0.021945
Bomo_Chr11	6321184	6322114	KWMTBOMO06373	5923761	0.024751
Bomo_Chr11	6321184	6322114	KWMTBOMO06374	5936660	0.028826
Bomo_Chr11	6321184	6322114	KWMTBOMO06375	5938021	0.028829
Bomo_Chr11	6321184	6322114	KWMTBOMO06376	5942740	0.025226
Bomo_Chr11	6321184	6322114	KWMTBOMO06377	5944611	0.025226
Bomo_Chr11	6321184	6322114	KWMTBOMO06378	5960290	0.024081
Bomo_Chr11	6321184	6322114	KWMTBOMO06379	5962211	0.024082
Bomo_Chr11	6321184	6322114	KWMTBOMO06380	5969911	0.024081
Bomo_Chr11	6321184	6322114	KWMTBOMO06381	5973360	0.024006
Bomo_Chr11	6321184	6322114	KWMTBOMO06382	5974301	0.024005
Bomo_Chr11	6321184	6322114	KWMTBOMO06383	6035841	0.052019
Bomo_Chr11	6321184	6322114	KWMTBOMO06384	6090951	0.040694
Bomo_Chr11	6321184	6322114	KWMTBOMO06385	6095641	0.040687
Bomo_Chr11	6321184	6322114	KWMTBOMO06386	6100361	0.054773
Bomo_Chr11	6321184	6322114	KWMTBOMO06397	6342531	0.102366
Bomo_Chr11	6321184	6322114	KWMTBOMO06398	6370780	0.070669
Bomo_Chr11	6321184	6322114	KWMTBOMO06399	6378130	0.070676
Bomo_Chr11	6321184	6322114	KWMTBOMO06400	6381101	0.02928
Bomo_Chr11	6321184	6322114	KWMTBOMO06401	6461301	0.074651
Bomo_Chr11	6321184	6322114	KWMTBOMO06402	6473080	0.042319
Bomo_Chr11	6321184	6322114	KWMTBOMO06403	6473631	0.042318
Bomo_Chr11	6321184	6322114	KWMTBOMO06404	6484960	0.064846
Bomo_Chr11	6321184	6322114	KWMTBOMO06405	6495950	0.037232
Bomo_Chr11	6321184	6322114	KWMTBOMO06406	6497151	0.037231
Bomo_Chr11	6321184	6322114	KWMTBOMO06407	6516170	0.038924
Bomo_Chr11	6321184	6322114	KWMTBOMO06408	6520521	0.057769
Bomo_Chr11	6321184	6322114	KWMTBOMO06410	6573300	0.060822
Bomo_Chr11	6321184	6322114	KWMTBOMO06411	6583641	0.068131
Bomo_Chr11	6321184	6322114	KWMTBOMO06413	6751210	0.038253
Bomo_Chr11	6321184	6322114	KWMTBOMO06417	6810971	0.020736
Bomo_Chr11	6321184	6322114	KWMTBOMO06418	6829140	0.041562
Bomo_Chr11	6321184	6322114	KWMTBOMO06419	6829311	0.041562
Bomo_Chr11	6321184	6322114	KWMTBOMO06421	6869470	0.043411
Bomo_Chr11	6321184	6322114	KWMTBOMO06422	6869931	0.043412
Bomo_Chr11	6321184	6322114	KWMTBOMO06426	6929400	0.036222
Bomo_Chr11	6321184	6322114	KWMTBOMO06427	6932651	0.025131
Bomo_Chr11	6321184	6322114	KWMTBOMO06428	6943771	0.033492
Bomo_Chr11	6321184	6322114	KWMTBOMO06429	6970651	0.032194
Bomo_Chr11	6321184	6322114	KWMTBOMO06430	6983900	0.029473
Bomo_Chr11	6321184	6322114	KWMTBOMO06431	6984951	0.029474
Bomo_Chr11	6321184	6322114	KWMTBOMO06432	7030700	0.029825
Bomo_Chr11	6321184	6322114	KWMTBOMO06433	7076850	0.029716
Bomo_Chr11	6321184	6322114	KWMTBOMO06434	7079491	0.02972
Bomo_Chr11	6321184	6322114	KWMTBOMO06435	7093820	0.028505
Bomo_Chr11	6321184	6322114	KWMTBOMO06436	7094071	0.028505
Bomo_Chr11	6321184	6322114	KWMTBOMO06437	7099420	0.028507
Bomo_Chr11	6321184	6322114	KWMTBOMO06438	7107750	0.02802
Bomo_Chr11	6321184	6322114	KWMTBOMO06439	7115520	0.030691
Bomo_Chr11	6321184	6322114	KWMTBOMO06440	7138060	0.026259
Bomo_Chr11	6321184	6322114	KWMTBOMO06441	7142061	0.035171
Bomo_Chr11	6321184	6322114	KWMTBOMO06442	7150420	0.034195
Bomo_Chr11	6321184	6322114	KWMTBOMO06446	7201491	0.036764
Bomo_Chr11	6321184	6322114	KWMTBOMO06448	7318350	0.034333
Bomo_Chr11	6321184	6322114	KWMTBOMO06450	7357651	0.036999
Bomo_Chr11	6321184	6322114	KWMTBOMO06451	7375121	0.032315
Bomo_Chr11	6321184	6322114	KWMTBOMO06452	7379941	0.032276
Bomo_Chr11	6321184	6322114	KWMTBOMO06453	7432970	0.043347
Bomo_Chr11	6321184	6322114	KWMTBOMO06454	7441240	0.024802
Bomo_Chr11	6321184	6322114	KWMTBOMO06455	7603381	0.025095
[truncated: 15,778 more rows]
