# Supplementary material for: Genome-wide chromatin interaction profiling reveals a vital role of super-enhancers and rearrangements in host enhancer contacts during BmNPV infection
Source: HighWire-hosted journal article supplement (doi:10.1101/gr.277931.123), 2023-10-23
Supplement: Supplemental_Table_S3.xlsx [file Supplemental_Table_S3.xlsx]

## Sheet: superEnh
Supplemental Table S3. List of the clustered super-enhancers.
chr	enhancer_start	enhancer_stop	cluster	background-subtracted_H3K27ac_signal
Bomo_Chr2	1532760	1534109	189	1351
Bomo_Chr2	1541537	1542707	189	1503
Bomo_Chr2	1543801	1544987	189	1755
Bomo_Chr2	1548772	1549715	189	2124
Bomo_Chr2	1557107	1558557	189	4227
Bomo_Chr2	1559513	1561062	189	3316
Bomo_Chr2	5692804	5693641	223	1187
Bomo_Chr2	5704528	5705685	223	2244
Bomo_Chr2	5708584	5709404	223	1431
Bomo_Chr2	5710471	5711467	223	2995
Bomo_Chr2	5715918	5717231	223	2091
Bomo_Chr2	5723612	5725258	223	5542
Bomo_Chr3	10639383	10641274	355	21081
Bomo_Chr4	706856	707835	395	1164
Bomo_Chr4	712723	714024	395	994
Bomo_Chr4	718223	719008	395	833
Bomo_Chr4	724140	726500	395	1997
Bomo_Chr4	735458	736404	395	2895
Bomo_Chr4	737014	738207	395	3122
Bomo_Chr4	738934	739434	395	1229
Bomo_Chr4	741303	742059	395	1427
Bomo_Chr4	742367	742867	395	1186
Bomo_Chr4	1713943	1714443	405	22365
Bomo_Chr4	1714904	1717376	405	81235
Bomo_Chr4	1717443	1717943	405	25432
Bomo_Chr4	1717978	1719242	405	54144
Bomo_Chr4	9329413	9330241	472	15637
Bomo_Chr4	9330266	9332603	472	23896
Bomo_Chr4	9332807	9333738	472	9353
Bomo_Chr4	9334197	9337225	472	42724
Bomo_Chr4	15279345	15279845	513	8580
Bomo_Chr4	15280070	15281501	513	14561
Bomo_Chr4	18620235	18621922	536	21996
Bomo_Chr4	18621937	18622922	536	3999
Bomo_Chr4	18623217	18623717	536	12558
Bomo_Chr4	18623746	18624400	536	13889
Bomo_Chr4	18624510	18626013	536	12270
Bomo_Chr4	18626409	18626938	536	5483
Bomo_Chr4	18627649	18628596	536	8759
Bomo_Chr5	8933963	8935749	620	3773
Bomo_Chr5	8942337	8943253	620	2291
Bomo_Chr5	8945872	8947076	620	3981
Bomo_Chr5	8981799	8982299	621	4127
Bomo_Chr5	8990692	8991654	621	3851
Bomo_Chr5	8992550	8993624	621	3664
Bomo_Chr5	8999468	9001048	621	9948
Bomo_Chr5	9003483	9004235	621	6356
Bomo_Chr5	9004303	9004803	621	5313
Bomo_Chr5	9005128	9006471	621	8814
Bomo_Chr5	9021553	9023190	622	3732
Bomo_Chr5	9028866	9030077	622	6630
Bomo_Chr5	9031019	9031941	622	4357
Bomo_Chr5	12293389	12294335	653	18767
Bomo_Chr5	12294381	12295237	653	10173
Bomo_Chr5	12295260	12295760	653	6021
Bomo_Chr5	12295782	12296282	653	6294
Bomo_Chr5	12296387	12296887	653	5690
Bomo_Chr5	12300108	12301007	653	831
Bomo_Chr6	3758504	3759401	738	930
Bomo_Chr6	3760211	3762281	738	938
Bomo_Chr6	3763504	3764390	738	399
Bomo_Chr6	3770136	3770636	738	727
Bomo_Chr6	3771690	3772544	738	488
Bomo_Chr6	3772600	3773440	738	1369
Bomo_Chr6	3779436	3780243	738	1034
Bomo_Chr6	3790394	3792310	738	3112
Bomo_Chr6	3803191	3804012	738	457
Bomo_Chr6	3814135	3815343	738	401
Bomo_Chr6	3937256	3938195	740	483
Bomo_Chr6	3946281	3947365	740	1263
Bomo_Chr6	3948838	3949803	740	1168
Bomo_Chr6	3959031	3959531	740	759
Bomo_Chr6	3964669	3965169	740	812
Bomo_Chr6	3967172	3967672	740	727
Bomo_Chr6	3968148	3968648	740	1291
Bomo_Chr6	3969343	3969843	740	919
Bomo_Chr6	3971033	3971533	740	787
Bomo_Chr6	3971945	3972445	740	844
Bomo_Chr6	3972767	3973267	740	928
Bomo_Chr6	3973381	3973881	740	1214
Bomo_Chr6	3974704	3976219	740	2611
Bomo_Chr6	3979118	3980051	740	596
Bomo_Chr6	6761450	6763445	756	12449
Bomo_Chr8	3254361	3256095	949	2439
Bomo_Chr8	3256210	3256711	949	1640
Bomo_Chr8	3257169	3258087	949	7745
Bomo_Chr8	3258142	3258642	949	3065
Bomo_Chr8	3268199	3269932	949	1403
Bomo_Chr8	3270076	3271660	949	1003
Bomo_Chr8	16065068	16065568	1054	21837
Bomo_Chr9	3762914	3764072	1088	1551
Bomo_Chr9	3764090	3764998	1088	970
Bomo_Chr9	3771768	3773405	1088	3281
Bomo_Chr9	3773597	3774288	1088	1106
Bomo_Chr9	3778588	3779088	1088	1033
Bomo_Chr9	3779301	3779801	1088	975
Bomo_Chr9	3779995	3781043	1088	1667
Bomo_Chr9	3783263	3784382	1088	922
Bomo_Chr9	11025658	11026293	1128	508
Bomo_Chr9	11026491	11027023	1128	380
Bomo_Chr9	11029250	11030050	1128	960
Bomo_Chr9	11031691	11032996	1128	1903
Bomo_Chr9	11033419	11033919	1128	871
Bomo_Chr9	11039556	11040433	1128	2317
Bomo_Chr9	11041194	11042826	1128	3358
Bomo_Chr9	11044707	11045421	1128	1804
Bomo_Chr9	11048280	11049667	1128	2985
Bomo_Chr9	11054969	11056228	1128	2168
Bomo_Chr9	11056862	11059996	1128	3351
Bomo_Chr9	15305982	15306933	1164	487
Bomo_Chr9	15306999	15307879	1164	259
Bomo_Chr9	15319341	15321410	1164	1657
Bomo_Chr9	15328294	15329229	1164	829
Bomo_Chr9	15334430	15334930	1164	593
Bomo_Chr9	15336137	15337626	1164	2970
Bomo_Chr9	15345646	15346146	1164	554
Bomo_Chr9	15346843	15347813	1164	1376
Bomo_Chr9	15349001	15350252	1164	944
Bomo_Chr10	2917605	2918298	1201	1069
Bomo_Chr10	2919698	2920198	1201	1192
Bomo_Chr10	2920539	2921368	1201	1835
Bomo_Chr10	2922033	2922968	1201	1216
Bomo_Chr10	2924397	2924897	1201	1048
Bomo_Chr10	2926056	2926556	1201	923
Bomo_Chr10	2929868	2930368	1201	1260
Bomo_Chr10	2930907	2932076	1201	1948
Bomo_Chr10	2932952	2934459	1201	2995
Bomo_Chr10	2939317	2941379	1201	2799
Bomo_Chr10	2941651	2942535	1201	1330
Bomo_Chr10	2949672	2951122	1201	1530
Bomo_Chr10	17546205	17546816	1342	1615
Bomo_Chr10	17547440	17547998	1342	2333
Bomo_Chr10	17548044	17548645	1342	3176
Bomo_Chr10	17549070	17551434	1342	20682
Bomo_Chr10	17552021	17552551	1342	3193
Bomo_Chr11	3195887	3197284	1388	1725
Bomo_Chr11	3202384	3204560	1388	3686
Bomo_Chr11	3210116	3211446	1388	2300
Bomo_Chr11	3211460	3212283	1388	1362
Bomo_Chr11	3217736	3219186	1388	1409
Bomo_Chr11	3226743	3227655	1388	2824
Bomo_Chr11	3229042	3230318	1388	2022
Bomo_Chr11	3231783	3232283	1388	2222
Bomo_Chr11	3232507	3233394	1388	3226
Bomo_Chr11	3233657	3234620	1388	2999
Bomo_Chr11	4511394	4512821	1401	6200
Bomo_Chr11	4512867	4513558	1401	4696
Bomo_Chr11	4514339	4514839	1401	1445
Bomo_Chr11	4515704	4516286	1401	837
Bomo_Chr11	4954522	4955198	1405	1242
Bomo_Chr11	4956250	4957067	1405	1403
Bomo_Chr11	4959147	4960003	1405	2683
Bomo_Chr11	4960835	4962087	1405	4823
Bomo_Chr11	4963950	4964534	1405	3396
Bomo_Chr11	4964578	4965078	1405	2169
Bomo_Chr11	6318388	6320955	1414	135745
Bomo_Chr11	6321184	6322114	1414	73783
Bomo_Chr11	6322976	6323476	1414	22134
Bomo_Chr11	6323601	6324383	1414	22309
Bomo_Chr11	6326019	6326808	1414	54546
Bomo_Chr11	14696176	14697844	1476	3111
Bomo_Chr11	14702295	14702795	1476	1740
Bomo_Chr11	14703001	14704123	1476	4523
Bomo_Chr11	14706041	14706796	1476	1599
Bomo_Chr12	16568129	16569032	1627	31457
Bomo_Chr12	16570373	16571970	1627	70831
Bomo_Chr12	16572028	16572528	1627	43188
Bomo_Chr12	16572595	16573127	1627	34758
Bomo_Chr12	16573656	16574543	1627	71081
Bomo_Chr12	16574612	16576367	1627	59767
Bomo_Chr12	16576392	16577134	1627	51753
Bomo_Chr12	17282892	17283714	1632	1127
Bomo_Chr12	17291703	17292207	1632	771
Bomo_Chr12	17296796	17297396	1632	676
Bomo_Chr12	17300591	17301494	1632	885
Bomo_Chr12	17301500	17302000	1632	800
Bomo_Chr12	17302014	17303252	1632	2002
Bomo_Chr12	17308383	17308883	1632	777
Bomo_Chr12	17309461	17309961	1632	1212
Bomo_Chr12	17311399	17313549	1632	8015
Bomo_Chr13	5218151	5219393	1685	3944
Bomo_Chr13	5222558	5223058	1685	1164
Bomo_Chr13	5224221	5225013	1685	3022
Bomo_Chr13	5225876	5226376	1685	1794
Bomo_Chr13	5233077	5233956	1685	3611
Bomo_Chr13	5234424	5234924	1685	2589
Bomo_Chr13	5235497	5236367	1685	5065
Bomo_Chr13	5236485	5236985	1685	3994
Bomo_Chr13	5238877	5239377	1685	2338
Bomo_Chr13	5244021	5244521	1685	2160
Bomo_Chr13	5244613	5246030	1685	7977
Bomo_Chr13	5247029	5247529	1685	3447
Bomo_Chr13	5247642	5248337	1685	4944
Bomo_Chr13	5252909	5254055	1685	5695
Bomo_Chr13	5254612	5255783	1685	6684
Bomo_Chr13	5262745	5264456	1685	8211
Bomo_Chr13	5264719	5265219	1685	3615
Bomo_Chr13	5274478	5275164	1685	2874
Bomo_Chr13	5276928	5277732	1685	3073
Bomo_Chr13	5278343	5279045	1685	1513
Bomo_Chr13	5279175	5279675	1685	936
Bomo_Chr13	5284782	5285282	1685	1327
Bomo_Chr13	5285472	5285972	1685	1573
Bomo_Chr14	7009937	7010760	1835	15430
Bomo_Chr14	7010799	7011299	1835	9426
Bomo_Chr14	7013344	7014280	1835	9260
Bomo_Chr14	7014738	7015926	1835	7502
Bomo_Chr14	7016162	7017516	1835	18373
Bomo_Chr15	542207	543056	1888	565
Bomo_Chr15	545947	547792	1888	2085
Bomo_Chr15	551310	551836	1888	840
Bomo_Chr15	552040	552882	1888	975
Bomo_Chr15	554472	554972	1888	1157
Bomo_Chr15	555494	555994	1888	1048
Bomo_Chr15	556914	558323	1888	2961
Bomo_Chr15	559318	559818	1888	965
Bomo_Chr15	565604	566785	1888	2801
Bomo_Chr15	567208	569403	1888	4197
Bomo_Chr15	5520653	5522378	1935	2461
Bomo_Chr15	5530618	5531701	1935	2878
Bomo_Chr15	5535065	5535565	1935	1574
Bomo_Chr15	5535804	5537319	1935	5280
Bomo_Chr15	5542883	5543869	1935	1976
Bomo_Chr15	11824477	11825258	1999	1386
Bomo_Chr15	11827285	11828149	1999	1763
Bomo_Chr15	11829456	11829956	1999	1638
Bomo_Chr15	11830983	11831483	1999	1201
Bomo_Chr15	11831757	11832360	1999	1389
Bomo_Chr15	11832875	11833375	1999	1333
Bomo_Chr15	11833396	11833896	1999	1381
Bomo_Chr15	11834256	11834756	1999	1698
Bomo_Chr15	11835362	11835862	1999	1573
Bomo_Chr15	11836011	11836936	1999	2795
Bomo_Chr15	11839758	11840720	1999	2013
Bomo_Chr15	16394376	16395843	2031	3505
Bomo_Chr15	16395876	16399402	2031	13396
Bomo_Chr16	480904	481724	2057	297
Bomo_Chr16	482214	483476	2057	15672
Bomo_Chr16	12079180	12080142	2158	748
Bomo_Chr16	12084545	12085430	2158	957
Bomo_Chr16	12088645	12089145	2158	587
Bomo_Chr16	12100860	12101893	2158	979
Bomo_Chr16	12102518	12103018	2158	654
Bomo_Chr16	12107629	12108129	2158	835
Bomo_Chr16	12108279	12108779	2158	881
Bomo_Chr16	12108861	12110108	2158	1794
Bomo_Chr16	12110519	12111538	2158	819
Bomo_Chr16	12116220	12117428	2158	1511
Bomo_Chr17	3523552	3524918	2214	2933
Bomo_Chr17	3530378	3530878	2214	1461
Bomo_Chr17	3531153	3531900	2214	1847
Bomo_Chr17	3533099	3533599	2214	1041
Bomo_Chr17	3537577	3538077	2214	1091
Bomo_Chr17	3538228	3539031	2214	2717
Bomo_Chr17	3539101	3539790	2214	2714
Bomo_Chr17	3540175	3540917	2214	2554
Bomo_Chr17	3550087	3550587	2214	950
Bomo_Chr17	3551405	3552216	2214	1862
Bomo_Chr17	12017433	12018282	2281	1274
Bomo_Chr17	12018531	12019031	2281	1079
Bomo_Chr17	12019158	12019658	2281	1118
Bomo_Chr17	12023987	12024715	2281	3780
Bomo_Chr17	12024819	12025704	2281	4147
Bomo_Chr17	12025775	12026793	2281	3799
Bomo_Chr17	13403762	13404728	2292	2990
Bomo_Chr17	13409120	13411792	2292	8995
Bomo_Chr17	15179593	15180788	2308	10029
Bomo_Chr17	15180860	15182092	2308	8145
Bomo_Chr17	15182146	15184046	2308	12230
Bomo_Chr18	7902239	7903124	2397	1146
Bomo_Chr18	7904485	7905887	2397	2356
Bomo_Chr18	7913205	7914073	2397	990
Bomo_Chr18	7917371	7917871	2397	863
Bomo_Chr18	7918829	7920492	2397	2815
Bomo_Chr18	7921045	7921545	2397	953
Bomo_Chr18	7923053	7923553	2397	1209
Bomo_Chr18	7927759	7928259	2397	575
Bomo_Chr19	5672781	5673619	2509	953
Bomo_Chr19	5673641	5674584	2509	1231
Bomo_Chr19	5675274	5675774	2509	1278
Bomo_Chr19	5675782	5676282	2509	1412
Bomo_Chr19	5676884	5677384	2509	1237
Bomo_Chr19	5677815	5678315	2509	2011
Bomo_Chr19	5690774	5691721	2509	1200
Bomo_Chr19	5696168	5696959	2509	929
Bomo_Chr19	5702712	5703212	2509	1345
Bomo_Chr19	5712559	5713496	2509	1867
Bomo_Chr19	9625474	9627208	2536	27801
Bomo_Chr19	9627291	9628014	2536	8539
Bomo_Chr19	9628318	9628818	2536	6192
Bomo_Chr20	793552	794337	2586	2266
Bomo_Chr20	795450	795950	2586	619
Bomo_Chr20	796674	797433	2586	2317
Bomo_Chr20	798390	799659	2586	2860
Bomo_Chr20	12113432	12114611	2704	2060
Bomo_Chr20	12115503	12116566	2704	1766
Bomo_Chr20	12116990	12117563	2704	1821
Bomo_Chr20	12117683	12118909	2704	2607
Bomo_Chr20	12125390	12126274	2704	666
Bomo_Chr20	12130707	12131650	2704	824
Bomo_Chr20	12137918	12138587	2704	543
Bomo_Chr20	12142908	12144592	2704	897
Bomo_Chr21	6970860	6971360	2773	1078
Bomo_Chr21	6971433	6971933	2773	988
Bomo_Chr21	6974201	6974701	2773	1082
Bomo_Chr21	6981114	6982002	2773	1630
Bomo_Chr21	6982309	6983254	2773	1872
Bomo_Chr21	6986737	6988092	2773	2406
Bomo_Chr21	6988973	6989786	2773	2030
Bomo_Chr21	6993883	6995449	2773	1951
Bomo_Chr21	12493790	12495026	2818	921
Bomo_Chr21	12503819	12504717	2818	789
Bomo_Chr21	12512463	12514905	2818	1128
Bomo_Chr21	12522184	12522933	2818	1817
Bomo_Chr21	12525813	12526313	2818	1631
Bomo_Chr21	12526740	12527240	2818	1538
Bomo_Chr21	12529054	12529572	2818	1000
Bomo_Chr21	12532384	12533277	2818	2119
Bomo_Chr21	14842300	14843733	2843	5399
Bomo_Chr21	14853350	14854933	2843	4557
Bomo_Chr22	13237474	13238525	2948	1649
Bomo_Chr22	13239220	13240458	2948	1962
Bomo_Chr22	13246586	13247826	2948	1630
Bomo_Chr22	13251101	13251601	2948	695
Bomo_Chr22	13252605	13253427	2948	1064
Bomo_Chr22	13258144	13260155	2948	2729
Bomo_Chr22	14999549	15000994	2958	8312
Bomo_Chr22	15008903	15010083	2958	8213
Bomo_Chr22	15010172	15011306	2958	7246
Bomo_Chr22	15017067	15019056	2958	7305
Bomo_Chr22	15101345	15102544	2959	3927
Bomo_Chr22	15102565	15103804	2959	3290
Bomo_Chr22	15104958	15105802	2959	1795
Bomo_Chr22	15203513	15204269	2962	3203
Bomo_Chr22	15204498	15205388	2962	3041
Bomo_Chr22	15205393	15206662	2962	3983
Bomo_Chr22	15226453	15228059	2963	8131
Bomo_Chr22	15228283	15229025	2963	4507
Bomo_Chr22	15230212	15230712	2963	2394
Bomo_Chr22	15235156	15236368	2963	4518
Bomo_Chr22	15236621	15238214	2963	5635
Bomo_Chr22	15241648	15242260	2963	699
Bomo_Chr23	8290374	8291689	3045	1461
Bomo_Chr23	8301186	8302010	3045	1510
Bomo_Chr23	8303104	8304821	3045	6126
Bomo_Chr23	8305004	8305504	3045	1248
Bomo_Chr23	8305726	8306226	3045	1240
Bomo_Chr23	8307213	8307863	3045	2427
Bomo_Chr23	14117887	14118819	3088	2804
Bomo_Chr23	14119299	14120176	3088	2831
Bomo_Chr23	14125384	14126751	3088	3694
Bomo_Chr23	14128603	14129573	3088	2543
Bomo_Chr23	14141305	14142333	3088	1983
Bomo_Chr23	14144041	14145164	3088	1187
Bomo_Chr24	376895	377826	3170	1586
Bomo_Chr24	379838	380338	3170	897
Bomo_Chr24	380633	381133	3170	817
Bomo_Chr24	384795	385295	3170	977
Bomo_Chr24	387224	387867	3170	1450
Bomo_Chr24	389370	389870	3170	968
Bomo_Chr24	393668	394402	3170	1050
Bomo_Chr24	397065	397911	3170	829
Bomo_Chr24	399983	401166	3170	1400
Bomo_Chr24	406115	407670	3170	2390
Bomo_Chr24	478506	479169	3171	1262
Bomo_Chr24	483031	483876	3171	1913
Bomo_Chr24	486409	486909	3171	974
Bomo_Chr24	488151	488893	3171	1601
Bomo_Chr24	488952	489826	3171	1412
Bomo_Chr24	500046	501002	3171	689
Bomo_Chr24	512090	512850	3171	778
Bomo_Chr24	519842	520783	3171	305
Bomo_Chr24	4951659	4952470	3201	2327
Bomo_Chr24	4952530	4953601	3201	3121
Bomo_Chr24	4959076	4960483	3201	8944
Bomo_Chr24	4960508	4961008	3201	4077
Bomo_Chr24	4961143	4961933	3201	5532
Bomo_Chr24	4965570	4967206	3201	11645
Bomo_Chr24	4972409	4972909	3201	3915
Bomo_Chr24	4972915	4973415	3201	3344
Bomo_Chr24	4978364	4980060	3201	11380
Bomo_Chr24	4981060	4981884	3201	5820
Bomo_Chr24	4982407	4982907	3201	4612
Bomo_Chr24	6008686	6009559	3213	41899
Bomo_Chr24	6009816	6010316	3213	37854
Bomo_Chr24	6010567	6011848	3213	59951
Bomo_Chr24	6012269	6013213	3213	48726
Bomo_Chr24	6014596	6015733	3213	77376
Bomo_Chr24	6015791	6016998	3213	56989
Bomo_Chr24	13967596	13968945	3278	3901
Bomo_Chr24	13969981	13970877	3278	2804
Bomo_Chr24	13974258	13974758	3278	713
Bomo_Chr24	13975181	13976567	3278	2556
Bomo_Chr24	13976631	13977789	3278	1941
Bomo_Chr24	13985531	13987001	3278	895
Bomo_Chr24	13991340	13992074	3278	1602
Bomo_Chr24	13992831	13994092	3278	1213
Bomo_Chr24	16468219	16472333	3306	15311
Bomo_Chr25	5623421	5624517	3356	935
Bomo_Chr25	5626025	5627138	3356	887
Bomo_Chr25	5631977	5632483	3356	927
Bomo_Chr25	5633801	5634402	3356	1242
Bomo_Chr25	5636673	5637173	3356	2202
Bomo_Chr25	5637383	5637939	3356	2625
Bomo_Chr25	5638944	5639553	3356	1389
Bomo_Chr25	5642074	5642574	3356	3769
Bomo_Chr25	5644147	5646172	3356	14528
Bomo_Chr25	5646826	5647839	3356	6590
Bomo_Chr25	5648293	5648793	3356	2553
Bomo_Chr25	6175080	6176238	3366	644
Bomo_Chr25	6186307	6187395	3366	1622
Bomo_Chr25	6193810	6194310	3366	1577
Bomo_Chr25	6195217	6195717	3366	1771
Bomo_Chr25	6195736	6196597	3366	3335
Bomo_Chr25	6196627	6197127	3366	2140
Bomo_Chr25	6198695	6199639	3366	4101
Bomo_Chr25	6205053	6205668	3366	1412
Bomo_Chr25	8931198	8933336	3394	797
Bomo_Chr25	8944415	8944967	3394	523
Bomo_Chr25	8947731	8949620	3394	2303
Bomo_Chr25	8949982	8950482	3394	903
Bomo_Chr25	8953879	8954952	3394	865
Bomo_Chr25	8963868	8964570	3394	800
Bomo_Chr25	8973338	8973839	3394	1299
Bomo_Chr25	8976263	8976838	3394	1058
Bomo_Chr25	8981812	8982840	3394	1070
Bomo_Chr25	8987284	8988629	3394	574
Bomo_Chr25	9000352	9001336	3394	807
Bomo_Chr25	9006486	9007832	3394	442
Bomo_Chr25	9018124	9019701	3394	846
Bomo_Chr25	10693953	10695024	3409	870
Bomo_Chr25	10695318	10696238	3409	689
Bomo_Chr25	10707688	10708738	3409	1201
Bomo_Chr25	10714555	10715331	3409	1207
Bomo_Chr25	10715564	10716317	3409	1404
Bomo_Chr25	10717710	10718560	3409	2259
Bomo_Chr25	10719295	10719795	3409	1702
Bomo_Chr25	10722024	10722524	3409	1200
Bomo_Chr27	5747088	5747934	3568	1537
Bomo_Chr27	5748952	5749798	3568	1151
Bomo_Chr27	5756026	5756973	3568	2535
Bomo_Chr27	5757152	5757652	3568	1506
Bomo_Chr27	5761937	5763134	3568	2862
Bomo_Chr27	6373357	6374770	3571	2158
Bomo_Chr27	6375109	6376326	3571	2754
Bomo_Chr27	6383060	6384657	3571	2336
Bomo_Chr27	6385818	6386787	3571	1566
Bomo_Chr27	6396803	6397394	3571	1082
Bomo_Chr27	6399287	6400237	3571	1536
Bomo_Chr27	6406447	6407437	3571	815
Bomo_Chr27	8746314	8747149	3584	2012
Bomo_Chr27	8750332	8752092	3584	1979
Bomo_Chr27	8752144	8753114	3584	1128
Bomo_Chr27	8754418	8754975	3584	1210
Bomo_Chr27	8756682	8757514	3584	2170
Bomo_Chr27	8760273	8761124	3584	2198
Bomo_Chr27	8762942	8763442	3584	3542
Bomo_Chr27	8764402	8764908	3584	1432
Bomo_Chr27	8765271	8766642	3584	5404
Bomo_Chr27	8768145	8769213	3584	2960
Bomo_Chr27	8774509	8776269	3584	1335
Bomo_Chr27	8784145	8785013	3584	989
Bomo_Chr28	7104354	7104867	3659	3997
Bomo_Chr28	7105142	7105642	3659	2895
Bomo_Chr28	7105766	7107068	3659	13188
Bomo_Chr28	7107677	7108177	3659	5969
Bomo_Chr28	7108389	7110338	3659	12950
