# Supplementary material for: Genome-wide chromatin interaction profiling reveals a vital role of super-enhancers and rearrangements in host enhancer contacts during BmNPV infection
Source: HighWire-hosted journal article supplement (doi:10.1101/gr.277931.123), 2023-10-23
Supplement: Supplemental_Table_S4.xlsx [file Supplemental_Table_S4.xlsx]

## Sheet: SE_associated_fpkm
Supplemental Table S4. Relative expression levels of the SE-associated genes.
geneID	FPKM
KWMTBOMO00723	23.7693
KWMTBOMO00887	0.253614
KWMTBOMO01631	0.103344
KWMTBOMO01632	3.06342
KWMTBOMO01633	0.309626
KWMTBOMO01634	0.155865
KWMTBOMO01635	90.0497
KWMTBOMO01636	88.9222
KWMTBOMO02342	1.95496
KWMTBOMO02690	240.736
KWMTBOMO02691	169.786
KWMTBOMO02692	136.844
KWMTBOMO02693	287.176
KWMTBOMO02694	835.713
KWMTBOMO02695	2.94791
KWMTBOMO02830	0.894412
KWMTBOMO02831	22.1326
KWMTBOMO02832	1.32306
KWMTBOMO02833	74.4789
KWMTBOMO02834	16.5524
KWMTBOMO02835	138.867
KWMTBOMO02836	229.438
KWMTBOMO02837	1.80832
KWMTBOMO03297	747.966
KWMTBOMO03298	32.6576
KWMTBOMO03300	1.1249
KWMTBOMO03305	41.5325
KWMTBOMO04323	42.4839
KWMTBOMO04324	76.1736
KWMTBOMO04325	131.541
KWMTBOMO04969	107.895
KWMTBOMO04970	107.763
KWMTBOMO05208	0.42053
KWMTBOMO05350	126.186
KWMTBOMO05351	2.63103
KWMTBOMO05465	285.938
KWMTBOMO05466	2.13908
KWMTBOMO05467	37.5637
KWMTBOMO06064	0.0789931
KWMTBOMO06068	0.0221324
KWMTBOMO06069	22.8633
KWMTBOMO06245	0.0209797
KWMTBOMO06246	82.3877
KWMTBOMO06308	0.425009
KWMTBOMO06335	231.329
KWMTBOMO06336	0.455085
KWMTBOMO06397	31.4609
KWMTBOMO06398	0.62437
KWMTBOMO06399	78.4466
KWMTBOMO06401	510.262
KWMTBOMO06404	61.069
KWMTBOMO06411	0
KWMTBOMO07483	6.75891
KWMTBOMO07496	0.359343
KWMTBOMO07506	45.2362
KWMTBOMO07507	26.5028
KWMTBOMO07509	94.3177
KWMTBOMO07510	8.63815
KWMTBOMO07514	49.8842
KWMTBOMO07519	60.0377
KWMTBOMO07520	0.230428
KWMTBOMO07521	23.5798
KWMTBOMO07524	4.23753
KWMTBOMO07525	0.46414
KWMTBOMO07528	29.4389
KWMTBOMO07529	17.9471
KWMTBOMO07531	1.47
KWMTBOMO07532	0.87145
KWMTBOMO07533	0
KWMTBOMO07534	0.0808831
KWMTBOMO07535	6.83253
KWMTBOMO07536	2.3887
KWMTBOMO07539	6.64304
KWMTBOMO07540	21.8183
KWMTBOMO07542	19.5533
KWMTBOMO07543	173.298
KWMTBOMO07544	4.2207
KWMTBOMO07550	59.0475
KWMTBOMO07551	54.3436
KWMTBOMO07552	3091.72
KWMTBOMO07553	210.592
KWMTBOMO07554	562.554
KWMTBOMO07555	191.793
KWMTBOMO07556	3.81614
KWMTBOMO07558	13.964
KWMTBOMO07559	9.36291
KWMTBOMO07560	22.4595
KWMTBOMO07561	27.1616
KWMTBOMO07562	135.032
KWMTBOMO07563	111.499
KWMTBOMO07564	300.549
KWMTBOMO07565	19.0652
KWMTBOMO07700	5.28963
KWMTBOMO07716	21.761
KWMTBOMO07718	18.3405
KWMTBOMO07719	104.561
KWMTBOMO07720	140.477
KWMTBOMO07721	1388.37
KWMTBOMO08332	0.0255911
KWMTBOMO08346	0.0928493
KWMTBOMO08351	0.14755
KWMTBOMO08352	13.5
KWMTBOMO08365	56.3058
KWMTBOMO08366	12.1518
KWMTBOMO08368	43.0813
KWMTBOMO08369	65.3562
KWMTBOMO08370	54.8068
KWMTBOMO08371	21.1838
KWMTBOMO08374	0.0578847
KWMTBOMO08376	40.2688
KWMTBOMO08377	82.4819
KWMTBOMO08379	46.3954
KWMTBOMO08383	1.4008
KWMTBOMO08384	1.47287
KWMTBOMO08594	50.7339
KWMTBOMO08595	32.1311
KWMTBOMO08596	110.661
KWMTBOMO09129	84.7284
KWMTBOMO09130	120.504
KWMTBOMO09918	139.451
KWMTBOMO09919	8.45653
KWMTBOMO09920	0.19576
KWMTBOMO10172	37.6917
KWMTBOMO10173	0.405176
KWMTBOMO10174	236.181
KWMTBOMO10474	70.1778
KWMTBOMO10947	95.1069
KWMTBOMO11436	471.821
KWMTBOMO11437	3.16549
KWMTBOMO12322	0.138646
KWMTBOMO12323	0.0477168
KWMTBOMO12551	124.478
KWMTBOMO12552	0.0403281
KWMTBOMO12553	2.53485
KWMTBOMO12555	0.097519
KWMTBOMO12703	62.3597
KWMTBOMO12704	155.116
KWMTBOMO13305	345.023
KWMTBOMO13306	366.044
KWMTBOMO13307	15.7092
KWMTBOMO13361	167.025
KWMTBOMO13364	364.843
KWMTBOMO13365	158.055
KWMTBOMO13366	39.0169
KWMTBOMO13749	284.036
KWMTBOMO14269	164.538
KWMTBOMO14270	0.190168
KWMTBOMO14272	104.666
KWMTBOMO14293	68.3326
KWMTBOMO14343	22.2451
KWMTBOMO14344	3.34631
KWMTBOMO14384	0.0489859
KWMTBOMO14387	170.155
KWMTBOMO14388	157.273
KWMTBOMO14389	50.0705
KWMTBOMO14390	10.6162
KWMTBOMO14395	0.0389249
KWMTBOMO14396	4.92743
KWMTBOMO14399	13.7102
KWMTBOMO14400	1.76398
KWMTBOMO14401	33.3814
KWMTBOMO14402	2.98705
KWMTBOMO14403	0.361355
KWMTBOMO14405	0.289591
KWMTBOMO14406	36.9287
KWMTBOMO14408	31.0023
KWMTBOMO14411	657.508
KWMTBOMO14412	212.895
KWMTBOMO14413	99.0425
KWMTBOMO14414	479.074
KWMTBOMO14415	339.932
KWMTBOMO14417	202.73
KWMTBOMO14418	46.8734
KWMTBOMO14420	391.893
KWMTBOMO14421	0.298992
KWMTBOMO14425	74.4689
KWMTBOMO14431	176.024
KWMTBOMO14432	31.0209
KWMTBOMO14433	366.684
KWMTBOMO14436	27.2243
KWMTBOMO14440	580.661
KWMTBOMO14441	0.169468
KWMTBOMO14442	13.2246
KWMTBOMO14443	45.5798
KWMTBOMO14444	8.09377
KWMTBOMO14448	5.90124
KWMTBOMO14449	21.2144
KWMTBOMO14450	34.2082
KWMTBOMO14457	3.65415
KWMTBOMO14458	56.6653
KWMTBOMO14459	54.3715
KWMTBOMO14461	2.95333
KWMTBOMO14462	23.5131
KWMTBOMO14465	10.3069
KWMTBOMO14484	0.436843
KWMTBOMO14742	11.6666
KWMTBOMO14743	36.3685
KWMTBOMO15131	1.17271
KWMTBOMO15132	191.445
KWMTBOMO15133	269.691
KWMTBOMO15134	60.7227
KWMTBOMO15181	618.79
KWMTBOMO15316	26.2676
KWMTBOMO15317	123.029
KWMTBOMO15318	25.9383
KWMTBOMO15319	54.1778
KWMTBOMO15371	125.227
KWMTBOMO15372	0.00640533
KWMTBOMO16000	251.724
KWMTBOMO16001	390.473
KWMTBOMO16023	4.86542
KWMTBOMO16086	0.249124
KWMTBOMO16087	3193.89
KWMTBOMO16088	107.841
KWMTBOMO16089	57.5975
KWMTBOMO16090	16.9783
KWMTBOMO16091	65.192
KWMTBOMO16092	0
KWMTBOMO16093	0.117458
KWMTBOMO16351	60.6596
