# Supplementary material for: Genome-wide chromatin interaction profiling reveals a vital role of super-enhancers and rearrangements in host enhancer contacts during BmNPV infection
Source: HighWire-hosted journal article supplement (doi:10.1101/gr.277931.123), 2023-10-23
Supplement: Supplemental_Table_S5.xlsx [file Supplemental_Table_S5.xlsx]

## Sheet: EnhancerPredictions_BmNPV
Supplemental Table S5. List of the enhancer-gene connections in BmNPV infected cells.
chr	enhancer_start	enhancer_end	TargetGene	TargetTSS	ABC.Score
Bomo_Chr1	46030	46530	KWMTBOMO00003	51976	0.039754
Bomo_Chr1	48263	48763	KWMTBOMO00003	51976	0.022823
Bomo_Chr1	54148	54648	KWMTBOMO00003	51976	0.02587
Bomo_Chr1	69182	69682	KWMTBOMO00003	51976	0.041697
Bomo_Chr1	103431	104425	KWMTBOMO00005	118755	0.039985
Bomo_Chr1	110894	111856	KWMTBOMO00005	118755	0.056208
Bomo_Chr1	119400	119900	KWMTBOMO00005	118755	0.02129
Bomo_Chr1	122601	123785	KWMTBOMO00005	118755	0.037443
Bomo_Chr1	122601	123785	KWMTBOMO00006	142035	0.020558
Bomo_Chr1	145170	145670	KWMTBOMO00006	142035	0.02788
Bomo_Chr1	194118	194961	KWMTBOMO00007	201965	0.02557
Bomo_Chr1	198055	198763	KWMTBOMO00007	201965	0.020615
Bomo_Chr1	204655	205696	KWMTBOMO00007	201965	0.022441
Bomo_Chr1	229668	231417	KWMTBOMO00007	201965	0.022909
Bomo_Chr1	318407	319414	KWMTBOMO00009	310965	0.028277
Bomo_Chr1	328838	330027	KWMTBOMO00009	310965	0.025397
Bomo_Chr1	348781	349942	KWMTBOMO00005	118755	0.021754
Bomo_Chr1	348781	349942	KWMTBOMO00007	201965	0.02581
Bomo_Chr1	348781	349942	KWMTBOMO00009	310965	0.035815
Bomo_Chr1	348781	349942	KWMTBOMO00010	340776	0.106279
Bomo_Chr1	348781	349942	KWMTBOMO00016	429286	0.023421
Bomo_Chr1	349994	350494	KWMTBOMO00010	340776	0.025387
Bomo_Chr1	351294	352334	KWMTBOMO00010	340776	0.042932
Bomo_Chr1	353483	354019	KWMTBOMO00010	340776	0.024643
Bomo_Chr1	356924	357522	KWMTBOMO00005	118755	0.026092
Bomo_Chr1	356924	357522	KWMTBOMO00009	310965	0.021121
Bomo_Chr1	356924	357522	KWMTBOMO00010	340776	0.06398
Bomo_Chr1	396610	397669	KWMTBOMO00016	429286	0.051227
Bomo_Chr1	431455	432230	KWMTBOMO00016	429286	0.023044
Bomo_Chr1	432260	433343	KWMTBOMO00016	429286	0.030656
Bomo_Chr1	433800	434300	KWMTBOMO00016	429286	0.024956
Bomo_Chr1	553538	554123	KWMTBOMO00020	550815	0.022697
Bomo_Chr1	553538	554123	KWMTBOMO00021	552536	0.022696
Bomo_Chr1	553538	554123	KWMTBOMO00022	564496	0.02073
Bomo_Chr1	558217	558844	KWMTBOMO00020	550815	0.020046
Bomo_Chr1	558217	558844	KWMTBOMO00021	552536	0.020044
Bomo_Chr1	560317	561003	KWMTBOMO00020	550815	0.031959
Bomo_Chr1	560317	561003	KWMTBOMO00021	552536	0.031957
Bomo_Chr1	560317	561003	KWMTBOMO00022	564496	0.029189
Bomo_Chr1	563254	563943	KWMTBOMO00020	550815	0.0356
Bomo_Chr1	563254	563943	KWMTBOMO00021	552536	0.035597
Bomo_Chr1	563254	563943	KWMTBOMO00022	564496	0.032514
Bomo_Chr1	565668	566279	KWMTBOMO00020	550815	0.021258
Bomo_Chr1	565668	566279	KWMTBOMO00021	552536	0.021257
Bomo_Chr1	1245247	1246772	KWMTBOMO00038	1247525	0.066273
Bomo_Chr1	1249143	1250533	KWMTBOMO00038	1247525	0.076485
Bomo_Chr1	1456417	1456917	KWMTBOMO00051	1448811	0.023747
Bomo_Chr1	1485930	1486649	KWMTBOMO00051	1448811	0.021764
Bomo_Chr1	1795321	1796169	KWMTBOMO00058	1816511	0.022313
Bomo_Chr1	1801418	1802119	KWMTBOMO00058	1816511	0.023053
Bomo_Chr1	1807310	1807810	KWMTBOMO00058	1816511	0.021827
Bomo_Chr1	1808373	1809148	KWMTBOMO00058	1816511	0.025811
Bomo_Chr1	1906934	1907434	KWMTBOMO00060	1903950	0.031661
Bomo_Chr1	1906934	1907434	KWMTBOMO00061	1906431	0.03166
Bomo_Chr1	1910711	1912132	KWMTBOMO00058	1816511	0.024922
Bomo_Chr1	1910711	1912132	KWMTBOMO00057	1833570	0.021173
Bomo_Chr1	1910711	1912132	KWMTBOMO00059	1834761	0.021173
Bomo_Chr1	1910711	1912132	KWMTBOMO00060	1903950	0.078702
Bomo_Chr1	1910711	1912132	KWMTBOMO00061	1906431	0.0787
Bomo_Chr1	1910711	1912132	KWMTBOMO00062	1945501	0.059965
Bomo_Chr1	1910711	1912132	KWMTBOMO00064	1981276	0.020111
Bomo_Chr1	1910711	1912132	KWMTBOMO00065	1983567	0.020111
Bomo_Chr1	1929564	1930547	KWMTBOMO00062	1945501	0.021852
Bomo_Chr1	1937100	1937600	KWMTBOMO00062	1945501	0.029372
Bomo_Chr1	2043538	2044293	KWMTBOMO00067	2048656	0.020507
Bomo_Chr1	2043538	2044293	KWMTBOMO00068	2052197	0.021434
Bomo_Chr1	2161081	2163112	KWMTBOMO00072	2165666	0.082424
Bomo_Chr1	2186603	2187103	KWMTBOMO00073	2190926	0.026615
Bomo_Chr1	2313940	2314691	KWMTBOMO00080	2315357	0.02051
Bomo_Chr1	2470571	2472346	KWMTBOMO00083	2477286	0.046603
Bomo_Chr1	2470571	2472346	KWMTBOMO00084	2483747	0.047313
Bomo_Chr1	2472814	2473695	KWMTBOMO00083	2477286	0.028081
Bomo_Chr1	2472814	2473695	KWMTBOMO00084	2483747	0.028509
Bomo_Chr1	2476218	2476727	KWMTBOMO00083	2477286	0.025441
Bomo_Chr1	2476218	2476727	KWMTBOMO00084	2483747	0.025829
Bomo_Chr1	2481845	2482345	KWMTBOMO00083	2477286	0.02041
Bomo_Chr1	2481845	2482345	KWMTBOMO00084	2483747	0.020721
Bomo_Chr1	2484468	2485283	KWMTBOMO00083	2477286	0.047051
Bomo_Chr1	2484468	2485283	KWMTBOMO00084	2483747	0.047768
Bomo_Chr1	2530293	2530793	KWMTBOMO00086	2531756	0.023543
Bomo_Chr1	2530293	2530793	KWMTBOMO00087	2535187	0.023543
Bomo_Chr1	2562961	2563520	KWMTBOMO00089	2565146	0.036609
Bomo_Chr1	2565741	2566581	KWMTBOMO00086	2531756	0.032508
Bomo_Chr1	2565741	2566581	KWMTBOMO00087	2535187	0.032508
Bomo_Chr1	2565741	2566581	KWMTBOMO00089	2565146	0.093612
Bomo_Chr1	2566616	2567408	KWMTBOMO00086	2531756	0.032186
Bomo_Chr1	2566616	2567408	KWMTBOMO00087	2535187	0.032186
Bomo_Chr1	2566616	2567408	KWMTBOMO00089	2565146	0.092684
Bomo_Chr1	2654209	2654963	KWMTBOMO00091	2658046	0.034543
Bomo_Chr1	2654209	2654963	KWMTBOMO00092	2665996	0.034399
Bomo_Chr1	2654209	2654963	KWMTBOMO00093	2668286	0.034398
Bomo_Chr1	2655170	2656648	KWMTBOMO00091	2658046	0.074744
Bomo_Chr1	2655170	2656648	KWMTBOMO00092	2665996	0.074431
Bomo_Chr1	2655170	2656648	KWMTBOMO00093	2668286	0.074431
Bomo_Chr1	2655170	2656648	KWMTBOMO00094	2688957	0.034668
Bomo_Chr1	2658786	2659493	KWMTBOMO00091	2658046	0.020802
Bomo_Chr1	2658786	2659493	KWMTBOMO00092	2665996	0.020715
Bomo_Chr1	2658786	2659493	KWMTBOMO00093	2668286	0.020715
Bomo_Chr1	2674651	2677833	KWMTBOMO00091	2658046	0.064283
Bomo_Chr1	2674651	2677833	KWMTBOMO00092	2665996	0.074894
Bomo_Chr1	2674651	2677833	KWMTBOMO00093	2668286	0.074893
Bomo_Chr1	2674651	2677833	KWMTBOMO00094	2688957	0.093101
Bomo_Chr1	2674651	2677833	KWMTBOMO00096	2766766	0.020831
Bomo_Chr1	2686296	2687137	KWMTBOMO00094	2688957	0.031398
Bomo_Chr1	2764927	2766215	KWMTBOMO00096	2766766	0.082343
Bomo_Chr1	2770270	2771064	KWMTBOMO00096	2766766	0.022226
Bomo_Chr1	2772910	2774459	KWMTBOMO00096	2766766	0.029958
Bomo_Chr1	2778947	2779841	KWMTBOMO00096	2766766	0.023656
Bomo_Chr1	2928232	2928807	KWMTBOMO00098	2926865	0.026967
Bomo_Chr1	2928814	2929314	KWMTBOMO00098	2926865	0.034843
Bomo_Chr1	2929570	2930801	KWMTBOMO00097	2904346	0.022758
Bomo_Chr1	2929570	2930801	KWMTBOMO00098	2926865	0.065319
Bomo_Chr1	3225964	3227317	KWMTBOMO00107	3221896	0.020016
Bomo_Chr1	3233292	3234127	KWMTBOMO00107	3221896	0.041134
Bomo_Chr1	3233292	3234127	KWMTBOMO00108	3232575	0.038544
Bomo_Chr1	3233292	3234127	KWMTBOMO00109	3235536	0.038543
Bomo_Chr1	3243031	3243949	KWMTBOMO00108	3232575	0.035986
Bomo_Chr1	3243031	3243949	KWMTBOMO00109	3235536	0.035985
Bomo_Chr1	3244218	3245038	KWMTBOMO00107	3221896	0.022728
Bomo_Chr1	3244218	3245038	KWMTBOMO00108	3232575	0.04155
Bomo_Chr1	3244218	3245038	KWMTBOMO00109	3235536	0.041549
Bomo_Chr1	3264280	3265665	KWMTBOMO00108	3232575	0.026228
Bomo_Chr1	3264280	3265665	KWMTBOMO00109	3235536	0.026227
Bomo_Chr1	3670606	3671106	KWMTBOMO00116	3677795	0.023237
Bomo_Chr1	3670606	3671106	KWMTBOMO00117	3679665	0.023237
Bomo_Chr1	3674817	3675599	KWMTBOMO00116	3677795	0.0404
Bomo_Chr1	3674817	3675599	KWMTBOMO00117	3679665	0.0404
Bomo_Chr1	3758065	3760558	KWMTBOMO00122	3785226	0.020802
Bomo_Chr1	3846705	3847460	KWMTBOMO00124	3802465	0.020065
Bomo_Chr1	3981242	3981995	KWMTBOMO00128	3972675	0.021848
Bomo_Chr1	3989747	3991041	KWMTBOMO00128	3972675	0.021308
Bomo_Chr1	4042641	4043204	KWMTBOMO00129	4048965	0.02514
Bomo_Chr1	4051541	4052489	KWMTBOMO00129	4048965	0.055679
Bomo_Chr1	4294825	4295643	KWMTBOMO00135	4282059	0.021732
Bomo_Chr1	4294825	4295643	KWMTBOMO00136	4297838	0.024787
Bomo_Chr1	4318187	4318766	KWMTBOMO00136	4297838	0.029486
Bomo_Chr1	4409088	4409706	KWMTBOMO00141	4410918	0.027452
Bomo_Chr1	4422636	4423962	KWMTBOMO00141	4410918	0.022991
Bomo_Chr1	4806638	4807138	KWMTBOMO00153	4808223	0.029809
Bomo_Chr1	4806638	4807138	KWMTBOMO00154	4810454	0.02904
Bomo_Chr1	4826022	4827131	KWMTBOMO00155	4820184	0.020166
Bomo_Chr1	4988905	4989405	KWMTBOMO00157	4985306	0.037088
Bomo_Chr1	4989598	4990098	KWMTBOMO00157	4985306	0.020669
Bomo_Chr1	5021085	5021985	KWMTBOMO00159	5023367	0.039105
Bomo_Chr1	5021085	5021985	KWMTBOMO00160	5033747	0.040862
Bomo_Chr1	5703268	5703768	KWMTBOMO00180	5702272	0.024495
Bomo_Chr1	5703268	5703768	KWMTBOMO00181	5704293	0.024495
Bomo_Chr1	5704970	5705470	KWMTBOMO00179	5667652	0.022313
Bomo_Chr1	5704970	5705470	KWMTBOMO00180	5702272	0.027972
Bomo_Chr1	5704970	5705470	KWMTBOMO00181	5704293	0.027972
Bomo_Chr1	5884499	5886516	KWMTBOMO00182	5874052	0.030945
Bomo_Chr1	5884499	5886516	KWMTBOMO00183	5883513	0.04896
Bomo_Chr1	5884499	5886516	KWMTBOMO00184	5918913	0.022889
Bomo_Chr1	5895276	5896580	KWMTBOMO00183	5883513	0.028377
Bomo_Chr1	5911103	5911603	KWMTBOMO00184	5918913	0.027935
Bomo_Chr1	5911103	5911603	KWMTBOMO00187	5978092	0.02667
Bomo_Chr1	5912690	5913190	KWMTBOMO00184	5918913	0.029374
Bomo_Chr1	5912690	5913190	KWMTBOMO00187	5978092	0.028043
Bomo_Chr1	5943023	5945331	KWMTBOMO00185	5948002	0.030043
Bomo_Chr1	6132383	6133225	KWMTBOMO00192	6157932	0.022824
Bomo_Chr1	6133432	6134372	KWMTBOMO00192	6157932	0.037863
Bomo_Chr1	6133432	6134372	KWMTBOMO00194	6173933	0.022083
Bomo_Chr1	6159490	6160417	KWMTBOMO00192	6157932	0.022625
Bomo_Chr1	6186230	6186730	KWMTBOMO00194	6173933	0.023332
Bomo_Chr1	6186230	6186730	KWMTBOMO00195	6184082	0.023176
Bomo_Chr1	6186230	6186730	KWMTBOMO00196	6185423	0.023171
Bomo_Chr1	6275079	6275787	KWMTBOMO00199	6272752	0.021603
Bomo_Chr1	6275079	6275787	KWMTBOMO00200	6273243	0.021603
Bomo_Chr1	6275079	6275787	KWMTBOMO00201	6281373	0.022254
Bomo_Chr1	6343117	6343617	KWMTBOMO00203	6341653	0.02407
Bomo_Chr1	6448898	6450981	KWMTBOMO00206	6420051	0.029396
Bomo_Chr1	6448898	6450981	KWMTBOMO00207	6425490	0.029361
Bomo_Chr1	6607171	6609230	KWMTBOMO00210	6575250	0.055565
Bomo_Chr1	6607171	6609230	KWMTBOMO00211	6576261	0.055563
Bomo_Chr1	6611923	6613303	KWMTBOMO00210	6575250	0.031575
Bomo_Chr1	6611923	6613303	KWMTBOMO00211	6576261	0.031574
Bomo_Chr1	6772791	6774666	KWMTBOMO00212	6770380	0.030275
Bomo_Chr1	6810173	6810725	KWMTBOMO00213	6816114	0.041314
Bomo_Chr1	6817045	6818301	KWMTBOMO00213	6816114	0.023566
Bomo_Chr1	6819092	6820287	KWMTBOMO00213	6816114	0.02815
Bomo_Chr1	6820768	6821615	KWMTBOMO00213	6816114	0.028627
Bomo_Chr1	6820768	6821615	KWMTBOMO00214	6849914	0.029815
Bomo_Chr1	7557585	7560590	KWMTBOMO00230	7602007	0.028161
Bomo_Chr1	8014033	8014751	KWMTBOMO00235	8005130	0.024428
Bomo_Chr1	8014033	8014751	KWMTBOMO00236	8010171	0.025764
Bomo_Chr1	8014033	8014751	KWMTBOMO00237	8017511	0.025759
Bomo_Chr1	8014795	8015618	KWMTBOMO00235	8005130	0.03133
Bomo_Chr1	8014795	8015618	KWMTBOMO00236	8010171	0.033043
Bomo_Chr1	8014795	8015618	KWMTBOMO00237	8017511	0.033038
Bomo_Chr1	8014795	8015618	KWMTBOMO00238	8035471	0.023962
Bomo_Chr1	8015728	8016473	KWMTBOMO00235	8005130	0.025187
Bomo_Chr1	8015728	8016473	KWMTBOMO00236	8010171	0.026564
Bomo_Chr1	8015728	8016473	KWMTBOMO00237	8017511	0.02656
Bomo_Chr1	8257584	8258426	KWMTBOMO00241	8252291	0.040224
Bomo_Chr1	8258490	8259191	KWMTBOMO00241	8252291	0.026886
Bomo_Chr1	8259591	8260198	KWMTBOMO00241	8252291	0.020975
Bomo_Chr1	8260709	8262276	KWMTBOMO00241	8252291	0.075698
Bomo_Chr1	8260709	8262276	KWMTBOMO00242	8273590	0.049663
Bomo_Chr1	8293750	8294956	KWMTBOMO00244	8307450	0.025037
Bomo_Chr1	8372211	8373343	KWMTBOMO00245	8385611	0.02122
Bomo_Chr1	8538831	8539816	KWMTBOMO00254	8532965	0.02414
Bomo_Chr1	8538831	8539816	KWMTBOMO00255	8534206	0.024136
Bomo_Chr1	8538831	8539816	KWMTBOMO00256	8546696	0.021394
Bomo_Chr1	8540052	8540552	KWMTBOMO00254	8532965	0.024573
Bomo_Chr1	8540052	8540552	KWMTBOMO00255	8534206	0.024569
Bomo_Chr1	8540052	8540552	KWMTBOMO00256	8546696	0.027929
Bomo_Chr1	8541382	8542410	KWMTBOMO00254	8532965	0.043616
Bomo_Chr1	8541382	8542410	KWMTBOMO00255	8534206	0.043609
Bomo_Chr1	8541382	8542410	KWMTBOMO00256	8546696	0.049572
Bomo_Chr1	8610000	8610500	KWMTBOMO00260	8615005	0.021909
Bomo_Chr1	8644478	8645467	KWMTBOMO00263	8633205	0.028848
Bomo_Chr1	8644478	8645467	KWMTBOMO00264	8643885	0.029461
Bomo_Chr1	8644478	8645467	KWMTBOMO00265	8646146	0.029459
Bomo_Chr1	8712318	8713867	KWMTBOMO00270	8728156	0.022155
Bomo_Chr1	8716218	8718463	KWMTBOMO00270	8728156	0.026381
Bomo_Chr1	8809167	8810396	KWMTBOMO00274	8808232	0.053583
Bomo_Chr1	8809167	8810396	KWMTBOMO00275	8813693	0.041392
Bomo_Chr1	8887702	8888671	KWMTBOMO00278	8874382	0.027368
Bomo_Chr1	8887702	8888671	KWMTBOMO00279	8878643	0.027365
Bomo_Chr1	8901370	8902263	KWMTBOMO00280	8911112	0.021333
Bomo_Chr1	8908942	8909811	KWMTBOMO00280	8911112	0.044792
Bomo_Chr1	8916983	8917933	KWMTBOMO00280	8911112	0.02843
Bomo_Chr1	9097695	9099236	KWMTBOMO00288	9094833	0.023241
Bomo_Chr1	9256515	9257015	KWMTBOMO00290	9258037	0.021142
Bomo_Chr1	9340280	9340780	KWMTBOMO00294	9341777	0.031945
Bomo_Chr1	9340280	9340780	KWMTBOMO00295	9359127	0.023856
Bomo_Chr1	9342461	9343429	KWMTBOMO00294	9341777	0.027569
Bomo_Chr1	9342461	9343429	KWMTBOMO00295	9359127	0.020588
Bomo_Chr1	9413535	9415272	KWMTBOMO00299	9419748	0.040845
Bomo_Chr1	9413535	9415272	KWMTBOMO00300	9432317	0.021452
Bomo_Chr1	9413535	9415272	KWMTBOMO00303	9484987	0.021963
Bomo_Chr1	9415735	9416235	KWMTBOMO00299	9419748	0.021464
Bomo_Chr1	9521742	9523238	KWMTBOMO00305	9527777	0.033808
Bomo_Chr1	9524150	9525474	KWMTBOMO00305	9527777	0.03315
Bomo_Chr1	9912272	9913081	KWMTBOMO00325	9910414	0.05005
Bomo_Chr1	9912272	9913081	KWMTBOMO00326	9919515	0.050054
Bomo_Chr1	9914621	9915230	KWMTBOMO00325	9910414	0.024614
Bomo_Chr1	9914621	9915230	KWMTBOMO00326	9919515	0.024616
Bomo_Chr1	9945262	9945877	KWMTBOMO00327	9943714	0.02685
Bomo_Chr1	9945262	9945877	KWMTBOMO00328	9944465	0.026851
Bomo_Chr1	9947232	9948143	KWMTBOMO00327	9943714	0.022302
Bomo_Chr1	9947232	9948143	KWMTBOMO00328	9944465	0.022303
Bomo_Chr1	10075219	10076721	KWMTBOMO00331	10046689	0.020181
Bomo_Chr1	10206533	10207611	KWMTBOMO00334	10191379	0.070233
Bomo_Chr1	10259931	10261080	KWMTBOMO00339	10334568	0.020987
Bomo_Chr1	10434174	10436258	KWMTBOMO00347	10420439	0.033046
Bomo_Chr1	10776965	10779431	KWMTBOMO00356	10806967	0.024389
Bomo_Chr1	10813420	10814629	KWMTBOMO00356	10806967	0.037252
Bomo_Chr1	10864245	10865805	KWMTBOMO00361	10863337	0.026346
Bomo_Chr1	10864245	10865805	KWMTBOMO00362	10868168	0.02635
Bomo_Chr1	10946795	10947701	KWMTBOMO00365	10925808	0.020566
Bomo_Chr1	10946795	10947701	KWMTBOMO00366	10965047	0.021637
Bomo_Chr1	10954406	10955515	KWMTBOMO00363	10901497	0.028548
Bomo_Chr1	10954406	10955515	KWMTBOMO00364	10903738	0.02855
Bomo_Chr1	10954406	10955515	KWMTBOMO00365	10925808	0.039241
Bomo_Chr1	10954406	10955515	KWMTBOMO00366	10965047	0.086397
Bomo_Chr1	10958940	10960277	KWMTBOMO00366	10965047	0.028799
Bomo_Chr1	10967756	10969312	KWMTBOMO00365	10925808	0.021431
Bomo_Chr1	10967756	10969312	KWMTBOMO00366	10965047	0.052709
Bomo_Chr1	11147509	11149132	KWMTBOMO00374	11142867	0.081123
Bomo_Chr1	11147509	11149132	KWMTBOMO00375	11156068	0.051929
Bomo_Chr1	11150756	11151971	KWMTBOMO00374	11142867	0.059869
Bomo_Chr1	11150756	11151971	KWMTBOMO00375	11156068	0.108131
Bomo_Chr1	11254059	11255038	KWMTBOMO00378	11240318	0.020014
Bomo_Chr1	11257806	11259170	KWMTBOMO00378	11240318	0.043409
Bomo_Chr1	11257806	11259170	KWMTBOMO00379	11253049	0.041839
Bomo_Chr1	11353639	11354725	KWMTBOMO00382	11360748	0.042872
Bomo_Chr1	11356465	11357360	KWMTBOMO00382	11360748	0.021321
Bomo_Chr1	11387478	11388702	KWMTBOMO00382	11360748	0.031445
Bomo_Chr1	11387478	11388702	KWMTBOMO00384	11392658	0.061471
Bomo_Chr1	11387478	11388702	KWMTBOMO00385	11393459	0.061473
Bomo_Chr1	11508160	11508707	KWMTBOMO00389	11459139	0.021344
Bomo_Chr1	11508160	11508707	KWMTBOMO00391	11509509	0.059764
Bomo_Chr1	11528993	11529920	KWMTBOMO00392	11548518	0.02112
Bomo_Chr1	11530783	11531378	KWMTBOMO00392	11548518	0.034117
Bomo_Chr1	11551699	11552541	KWMTBOMO00393	11553669	0.021557
Bomo_Chr1	12683257	12684642	KWMTBOMO00433	12680652	0.029758
Bomo_Chr1	12683257	12684642	KWMTBOMO00434	12682462	0.02976
Bomo_Chr1	12684701	12685201	KWMTBOMO00433	12680652	0.02255
Bomo_Chr1	12684701	12685201	KWMTBOMO00434	12682462	0.022552
Bomo_Chr1	12768602	12769102	KWMTBOMO00435	12766292	0.02059
Bomo_Chr1	12878410	12879295	KWMTBOMO00437	12885895	0.026531
Bomo_Chr1	13121710	13123211	KWMTBOMO00444	13101634	0.034864
Bomo_Chr1	13125443	13126571	KWMTBOMO00444	13101634	0.026658
Bomo_Chr1	13212320	13213159	KWMTBOMO00447	13224824	0.037691
Bomo_Chr1	13212320	13213159	KWMTBOMO00448	13233184	0.022613
Bomo_Chr1	13228667	13229771	KWMTBOMO00447	13224824	0.045096
Bomo_Chr1	13228667	13229771	KWMTBOMO00448	13233184	0.02697
Bomo_Chr1	13228667	13229771	KWMTBOMO00449	13250064	0.02017
Bomo_Chr1	13228667	13229771	KWMTBOMO00450	13252844	0.020174
Bomo_Chr1	13234566	13235650	KWMTBOMO00448	13233184	0.033171
Bomo_Chr1	13275006	13275583	KWMTBOMO00452	13261764	0.024486
Bomo_Chr1	13275006	13275583	KWMTBOMO00453	13267114	0.024481
Bomo_Chr1	13275630	13276384	KWMTBOMO00452	13261764	0.034238
Bomo_Chr1	13275630	13276384	KWMTBOMO00453	13267114	0.03423
Bomo_Chr1	13292212	13292870	KWMTBOMO00456	13293915	0.030353
Bomo_Chr1	13296396	13296896	KWMTBOMO00456	13293915	0.026733
Bomo_Chr1	13304103	13306046	KWMTBOMO00456	13293915	0.056358
Bomo_Chr1	13304103	13306046	KWMTBOMO00457	13310995	0.053387
Bomo_Chr1	13337917	13339448	KWMTBOMO00456	13293915	0.025925
Bomo_Chr1	13337917	13339448	KWMTBOMO00457	13310995	0.021434
Bomo_Chr1	13337917	13339448	KWMTBOMO00458	13393980	0.02764
Bomo_Chr1	13392442	13393386	KWMTBOMO00458	13393980	0.022209
Bomo_Chr1	13400988	13402363	KWMTBOMO00458	13393980	0.032654
Bomo_Chr1	13400988	13402363	KWMTBOMO00459	13415200	0.030916
Bomo_Chr1	13400988	13402363	KWMTBOMO00460	13418801	0.030922
Bomo_Chr1	13407806	13408306	KWMTBOMO00458	13393980	0.049021
Bomo_Chr1	13407806	13408306	KWMTBOMO00459	13415200	0.046411
Bomo_Chr1	13407806	13408306	KWMTBOMO00460	13418801	0.046419
Bomo_Chr1	13527190	13528202	KWMTBOMO00464	13485011	0.027126
Bomo_Chr1	13527190	13528202	KWMTBOMO00465	13557310	0.025058
Bomo_Chr1	13774573	13775334	KWMTBOMO00473	13764940	0.03867
Bomo_Chr1	13774573	13775334	KWMTBOMO00474	13766271	0.038672
Bomo_Chr1	13933250	13933981	KWMTBOMO00486	13930837	0.020826
Bomo_Chr1	13933250	13933981	KWMTBOMO00487	13932198	0.020826
Bomo_Chr1	13943419	13944822	KWMTBOMO00486	13930837	0.032376
Bomo_Chr1	13943419	13944822	KWMTBOMO00487	13932198	0.032377
Bomo_Chr1	13945676	13946694	KWMTBOMO00486	13930837	0.022883
Bomo_Chr1	13945676	13946694	KWMTBOMO00487	13932198	0.022883
Bomo_Chr1	14044033	14045047	KWMTBOMO00492	14054598	0.044841
Bomo_Chr1	14094090	14094590	KWMTBOMO00494	14091728	0.028058
Bomo_Chr1	14094090	14094590	KWMTBOMO00495	14106318	0.02828
Bomo_Chr1	14095268	14095924	KWMTBOMO00492	14054598	0.023377
Bomo_Chr1	14095268	14095924	KWMTBOMO00494	14091728	0.049823
Bomo_Chr1	14095268	14095924	KWMTBOMO00495	14106318	0.050216
Bomo_Chr1	14096111	14096611	KWMTBOMO00494	14091728	0.030784
Bomo_Chr1	14096111	14096611	KWMTBOMO00495	14106318	0.031027
Bomo_Chr1	14096775	14097275	KWMTBOMO00494	14091728	0.023128
Bomo_Chr1	14096775	14097275	KWMTBOMO00495	14106318	0.023311
Bomo_Chr1	14098171	14099206	KWMTBOMO00494	14091728	0.0417
Bomo_Chr1	14098171	14099206	KWMTBOMO00495	14106318	0.042029
Bomo_Chr1	14104060	14104651	KWMTBOMO00494	14091728	0.027817
Bomo_Chr1	14104060	14104651	KWMTBOMO00495	14106318	0.028037
Bomo_Chr1	14153551	14154502	KWMTBOMO00496	14143678	0.033872
Bomo_Chr1	14154718	14155457	KWMTBOMO00496	14143678	0.021765
Bomo_Chr1	14157577	14158179	KWMTBOMO00496	14143678	0.027318
Bomo_Chr1	14232273	14233192	KWMTBOMO00497	14245112	0.024308
Bomo_Chr1	14235692	14236837	KWMTBOMO00497	14245112	0.020051
Bomo_Chr1	14252530	14254648	KWMTBOMO00497	14245112	0.039296
Bomo_Chr1	14255578	14256467	KWMTBOMO00497	14245112	0.020173
Bomo_Chr1	14294073	14295098	KWMTBOMO00499	14293231	0.055157
Bomo_Chr1	14294073	14295098	KWMTBOMO00500	14296802	0.055166
Bomo_Chr1	14346581	14347820	KWMTBOMO00501	14337752	0.039968
Bomo_Chr1	14355477	14356553	KWMTBOMO00501	14337752	0.029769
Bomo_Chr1	14509775	14511468	KWMTBOMO00484	13917397	0.022927
Bomo_Chr1	14509775	14511468	KWMTBOMO00520	15200490	0.030494
Bomo_Chr1	14845229	14845729	KWMTBOMO00513	14847176	0.029034
Bomo_Chr1	14952351	14953296	KWMTBOMO00514	14954797	0.033347
Bomo_Chr1	15044662	15045872	KWMTBOMO00514	14954797	0.031306
Bomo_Chr1	15044662	15045872	KWMTBOMO00516	15122189	0.03955
Bomo_Chr1	15044662	15045872	KWMTBOMO00520	15200490	0.028326
Bomo_Chr1	15046805	15047766	KWMTBOMO00514	14954797	0.032451
Bomo_Chr1	15046805	15047766	KWMTBOMO00516	15122189	0.040998
Bomo_Chr1	15046805	15047766	KWMTBOMO00520	15200490	0.029363
Bomo_Chr1	15049028	15049528	KWMTBOMO00514	14954797	0.028576
Bomo_Chr1	15049028	15049528	KWMTBOMO00516	15122189	0.036102
Bomo_Chr1	15049028	15049528	KWMTBOMO00520	15200490	0.025856
Bomo_Chr1	15112377	15114930	KWMTBOMO00516	15122189	0.055765
Bomo_Chr1	15115158	15115658	KWMTBOMO00516	15122189	0.023342
Bomo_Chr1	15171712	15172212	KWMTBOMO00520	15200490	0.021994
Bomo_Chr1	15201426	15201926	KWMTBOMO00520	15200490	0.025825
Bomo_Chr1	15249562	15250195	KWMTBOMO00521	15248399	0.031318
Bomo_Chr1	15249562	15250195	KWMTBOMO00522	15256030	0.025901
Bomo_Chr1	15250560	15251060	KWMTBOMO00521	15248399	0.021243
Bomo_Chr1	15250560	15251060	KWMTBOMO00522	15256030	0.032819
Bomo_Chr1	15251095	15252350	KWMTBOMO00521	15248399	0.052073
Bomo_Chr1	15251095	15252350	KWMTBOMO00522	15256030	0.080448
Bomo_Chr1	15253556	15254403	KWMTBOMO00521	15248399	0.030254
Bomo_Chr1	15253556	15254403	KWMTBOMO00522	15256030	0.04674
Bomo_Chr1	15265838	15266553	KWMTBOMO00522	15256030	0.030131
Bomo_Chr1	15452233	15453230	KWMTBOMO00530	15460709	0.023405
Bomo_Chr1	15464042	15464542	KWMTBOMO00530	15460709	0.030943
Bomo_Chr1	15466255	15466755	KWMTBOMO00530	15460709	0.030165
Bomo_Chr1	15467209	15468028	KWMTBOMO00522	15256030	0.020846
Bomo_Chr1	15467209	15468028	KWMTBOMO00530	15460709	0.108589
Bomo_Chr1	15611142	15611770	KWMTBOMO00534	15615345	0.022241
Bomo_Chr1	15615882	15616742	KWMTBOMO00534	15615345	0.145975
Bomo_Chr1	15619206	15619706	KWMTBOMO00534	15615345	0.04424
Bomo_Chr1	15620173	15621057	KWMTBOMO00534	15615345	0.028672
Bomo_Chr1	15841655	15842608	KWMTBOMO00539	15852546	0.025255
Bomo_Chr1	15844529	15845029	KWMTBOMO00539	15852546	0.026687
Bomo_Chr1	15861881	15862416	KWMTBOMO00539	15852546	0.034724
Bomo_Chr1	15866220	15867101	KWMTBOMO00539	15852546	0.042079
Bomo_Chr1	16000144	16001552	KWMTBOMO00542	16045600	0.026746
Bomo_Chr1	16043796	16044322	KWMTBOMO00542	16045600	0.020003
Bomo_Chr1	16046652	16047340	KWMTBOMO00542	16045600	0.023928
Bomo_Chr1	16114474	16114974	KWMTBOMO00545	16116700	0.030397
Bomo_Chr1	16117678	16118748	KWMTBOMO00545	16116700	0.041774
Bomo_Chr1	16123293	16124075	KWMTBOMO00545	16116700	0.052748
Bomo_Chr1	16296247	16296747	KWMTBOMO00548	16295639	0.033124
Bomo_Chr1	16296247	16296747	KWMTBOMO00549	16308549	0.033965
Bomo_Chr1	16296762	16297262	KWMTBOMO00548	16295639	0.021555
Bomo_Chr1	16296762	16297262	KWMTBOMO00549	16308549	0.022102
Bomo_Chr1	16309456	16309956	KWMTBOMO00548	16295639	0.030883
Bomo_Chr1	16309456	16309956	KWMTBOMO00549	16308549	0.031667
Bomo_Chr1	16309456	16309956	KWMTBOMO00550	16312000	0.021208
Bomo_Chr1	16379762	16380332	KWMTBOMO00552	16398129	0.030299
Bomo_Chr1	16383339	16383839	KWMTBOMO00552	16398129	0.062483
Bomo_Chr1	16383949	16384449	KWMTBOMO00552	16398129	0.028624
Bomo_Chr1	16393425	16393925	KWMTBOMO00552	16398129	0.034121
Bomo_Chr1	16398863	16399363	KWMTBOMO00552	16398129	0.023128
Bomo_Chr1	16404113	16405216	KWMTBOMO00552	16398129	0.028793
Bomo_Chr1	16405413	16407196	KWMTBOMO00552	16398129	0.032648
Bomo_Chr1	16552956	16554242	KWMTBOMO00557	16541708	0.025471
Bomo_Chr1	16556154	16557113	KWMTBOMO00557	16541708	0.024072
Bomo_Chr1	16576887	16577559	KWMTBOMO00560	16584998	0.026604
Bomo_Chr1	16582021	16582742	KWMTBOMO00560	16584998	0.039162
Bomo_Chr1	16596690	16597886	KWMTBOMO00560	16584998	0.027984
Bomo_Chr1	16598454	16599279	KWMTBOMO00560	16584998	0.029501
Bomo_Chr1	16818595	16819095	KWMTBOMO00567	16825178	0.022162
Bomo_Chr1	16818595	16819095	KWMTBOMO00568	16826959	0.022163
Bomo_Chr1	16836082	16836639	KWMTBOMO00567	16825178	0.050254
Bomo_Chr1	16836082	16836639	KWMTBOMO00568	16826959	0.050256
Bomo_Chr1	16880011	16881283	KWMTBOMO00569	16896248	0.021119
Bomo_Chr1	16904380	16905303	KWMTBOMO00569	16896248	0.024957
Bomo_Chr1	16925720	16928018	KWMTBOMO00569	16896248	0.034421
Bomo_Chr1	16935210	16936168	KWMTBOMO00569	16896248	0.021459
Bomo_Chr1	17026437	17026937	KWMTBOMO00573	17024224	0.023131
Bomo_Chr1	17027006	17027978	KWMTBOMO00573	17024224	0.041491
Bomo_Chr1	17280642	17281142	KWMTBOMO00578	17284383	0.025946
Bomo_Chr1	17312787	17313718	KWMTBOMO00580	17328363	0.026157
Bomo_Chr1	17321817	17322785	KWMTBOMO00580	17328363	0.034243
Bomo_Chr1	17323821	17324321	KWMTBOMO00580	17328363	0.02336
Bomo_Chr1	17391896	17392396	KWMTBOMO00582	17389322	0.038555
Bomo_Chr1	17391896	17392396	KWMTBOMO00584	17408873	0.032339
Bomo_Chr1	17398045	17398810	KWMTBOMO00582	17389322	0.02147
Bomo_Chr1	17400102	17400959	KWMTBOMO00582	17389322	0.052849
Bomo_Chr1	17400102	17400959	KWMTBOMO00584	17408873	0.075669
Bomo_Chr1	17401435	17401935	KWMTBOMO00584	17408873	0.023863
Bomo_Chr1	17827272	17827772	KWMTBOMO00590	17835515	0.020082
Bomo_Chr1	17878874	17879813	KWMTBOMO00584	17408873	0.034644
Bomo_Chr1	17878874	17879813	KWMTBOMO00590	17835515	0.205863
Bomo_Chr1	17878874	17879813	KWMTBOMO00591	17941875	0.126845
Bomo_Chr1	17878874	17879813	KWMTBOMO00604	18288350	0.028722
Bomo_Chr1	17878874	17879813	KWMTBOMO00625	19440070	0.028469
Bomo_Chr1	17878874	17879813	KWMTBOMO00627	19444751	0.028453
Bomo_Chr1	17878874	17879813	KWMTBOMO00652	20164404	0.025646
Bomo_Chr1	17943095	17943595	KWMTBOMO00591	17941875	0.025547
Bomo_Chr1	17958520	17959414	KWMTBOMO00591	17941875	0.028656
Bomo_Chr1	17959466	17959966	KWMTBOMO00591	17941875	0.028569
Bomo_Chr1	18133461	18134281	KWMTBOMO00598	18149436	0.031431
Bomo_Chr1	18152148	18153086	KWMTBOMO00598	18149436	0.020584
Bomo_Chr1	18260895	18261395	KWMTBOMO00604	18288350	0.023978
Bomo_Chr1	18262801	18263792	KWMTBOMO00604	18288350	0.030721
Bomo_Chr1	18302239	18305702	KWMTBOMO00591	17941875	0.037113
Bomo_Chr1	18302239	18305702	KWMTBOMO00598	18149436	0.044422
Bomo_Chr1	18302239	18305702	KWMTBOMO00604	18288350	0.195554
Bomo_Chr1	18302239	18305702	KWMTBOMO00611	18744239	0.043879
Bomo_Chr1	18302239	18305702	KWMTBOMO00623	19402819	0.027343
Bomo_Chr1	18302239	18305702	KWMTBOMO00638	19766154	0.025197
Bomo_Chr1	18302239	18305702	KWMTBOMO00639	19789034	0.023265
Bomo_Chr1	18463534	18464359	KWMTBOMO00607	18476379	0.024862
Bomo_Chr1	18465536	18466475	KWMTBOMO00607	18476379	0.023312
Bomo_Chr1	18466543	18467043	KWMTBOMO00607	18476379	0.025012
Bomo_Chr1	18474682	18475632	KWMTBOMO00607	18476379	0.031685
Bomo_Chr1	18539083	18540060	KWMTBOMO00611	18744239	0.027167
Bomo_Chr1	18674936	18675436	KWMTBOMO00609	18678059	0.046369
Bomo_Chr1	18675943	18676443	KWMTBOMO00609	18678059	0.109065
Bomo_Chr1	18676762	18677262	KWMTBOMO00609	18678059	0.131464
Bomo_Chr1	18682477	18682977	KWMTBOMO00609	18678059	0.028511
Bomo_Chr1	18686778	18687278	KWMTBOMO00609	18678059	0.059574
Bomo_Chr1	18741857	18742357	KWMTBOMO00611	18744239	0.025551
Bomo_Chr1	18745890	18746390	KWMTBOMO00611	18744239	0.037494
Bomo_Chr1	18746642	18747142	KWMTBOMO00611	18744239	0.025168
Bomo_Chr1	18747158	18748039	KWMTBOMO00611	18744239	0.048606
Bomo_Chr1	18748894	18749438	KWMTBOMO00611	18744239	0.034035
Bomo_Chr1	19334610	19335914	KWMTBOMO00625	19440070	0.020947
Bomo_Chr1	19334610	19335914	KWMTBOMO00627	19444751	0.020949
Bomo_Chr1	19334610	19335914	KWMTBOMO00630	19526971	0.020374
Bomo_Chr1	19346431	19346936	KWMTBOMO00630	19526971	0.026318
Bomo_Chr1	19354620	19355897	KWMTBOMO00623	19402819	0.041057
Bomo_Chr1	19392463	19393437	KWMTBOMO00623	19402819	0.041309
Bomo_Chr1	19393989	19395222	KWMTBOMO00623	19402819	0.035418
Bomo_Chr1	19395593	19396093	KWMTBOMO00623	19402819	0.022137
Bomo_Chr1	19406728	19407849	KWMTBOMO00623	19402819	0.046726
Bomo_Chr1	19448987	19449504	KWMTBOMO00625	19440070	0.032534
Bomo_Chr1	19448987	19449504	KWMTBOMO00627	19444751	0.032537
Bomo_Chr1	19546840	19547340	KWMTBOMO00630	19526971	0.040583
Bomo_Chr1	19598347	19599276	KWMTBOMO00630	19526971	0.028128
Bomo_Chr1	19681014	19681773	KWMTBOMO00634	19684800	0.038095
Bomo_Chr1	19681014	19681773	KWMTBOMO00635	19689070	0.038119
Bomo_Chr1	19681783	19682751	KWMTBOMO00634	19684800	0.071322
Bomo_Chr1	19681783	19682751	KWMTBOMO00635	19689070	0.071366
Bomo_Chr1	19681783	19682751	KWMTBOMO00638	19766154	0.020894
Bomo_Chr1	19682782	19683282	KWMTBOMO00634	19684800	0.037507
Bomo_Chr1	19682782	19683282	KWMTBOMO00635	19689070	0.03753
Bomo_Chr1	19686601	19687582	KWMTBOMO00634	19684800	0.086601
Bomo_Chr1	19686601	19687582	KWMTBOMO00635	19689070	0.086654
Bomo_Chr1	19686601	19687582	KWMTBOMO00638	19766154	0.025369
Bomo_Chr1	19755950	19756450	KWMTBOMO00638	19766154	0.034689
Bomo_Chr1	19786963	19787463	KWMTBOMO00638	19766154	0.02074
Bomo_Chr1	19786963	19787463	KWMTBOMO00639	19789034	0.030896
Bomo_Chr1	19827110	19827654	KWMTBOMO00639	19789034	0.024049
Bomo_Chr1	19827790	19829400	KWMTBOMO00638	19766154	0.023099
Bomo_Chr1	19827790	19829400	KWMTBOMO00639	19789034	0.029242
Bomo_Chr1	19962898	19963768	KWMTBOMO00643	20002724	0.026198
Bomo_Chr1	19964529	19965332	KWMTBOMO00643	20002724	0.023519
Bomo_Chr1	20037856	20038356	KWMTBOMO00645	20018574	0.021108
Bomo_Chr1	20153335	20155270	KWMTBOMO00634	19684800	0.023456
Bomo_Chr1	20153335	20155270	KWMTBOMO00635	19689070	0.02347
Bomo_Chr1	20153335	20155270	KWMTBOMO00645	20018574	0.025895
Bomo_Chr1	20153335	20155270	KWMTBOMO00652	20164404	0.164668
Bomo_Chr1	20174985	20175485	KWMTBOMO00652	20164404	0.024766
Bomo_Chr1	20185136	20185636	KWMTBOMO00652	20164404	0.022864
Bomo_Chr1	20351757	20352791	KWMTBOMO00658	20380903	0.032204
Bomo_Chr1	20363235	20364917	KWMTBOMO00658	20380903	0.041589
Bomo_Chr1	20371387	20371887	KWMTBOMO00658	20380903	0.030511
Bomo_Chr1	20372303	20373212	KWMTBOMO00658	20380903	0.021863
Bomo_Chr1	20374189	20374844	KWMTBOMO00658	20380903	0.022904
Bomo_Chr1	20376253	20377599	KWMTBOMO00658	20380903	0.039393
Bomo_Chr1	20382002	20382750	KWMTBOMO00658	20380903	0.02352
Bomo_Chr1	20389826	20390415	KWMTBOMO00658	20380903	0.035397
Bomo_Chr1	20446567	20447609	KWMTBOMO00662	20538014	0.022167
Bomo_Chr1	20491519	20492813	KWMTBOMO00661	20528583	0.030521
Bomo_Chr1	20491519	20492813	KWMTBOMO00662	20538014	0.031733
Bomo_Chr1	20516599	20517468	KWMTBOMO00661	20528583	0.024243
Bomo_Chr1	20523983	20524939	KWMTBOMO00661	20528583	0.02302
Bomo_Chr1	20523983	20524939	KWMTBOMO00662	20538014	0.02025
Bomo_Chr1	20526607	20527806	KWMTBOMO00661	20528583	0.055441
Bomo_Chr1	20526607	20527806	KWMTBOMO00662	20538014	0.048769
Bomo_Chr1	20535648	20536825	KWMTBOMO00661	20528583	0.063846
Bomo_Chr1	20535648	20536825	KWMTBOMO00662	20538014	0.088464
Bomo_Chr1	20548112	20548612	KWMTBOMO00662	20538014	0.024273
Bomo_Chr1	20550913	20551413	KWMTBOMO00662	20538014	0.029713
Bomo_Chr10	9772	10994	KWMTBOMO05391	21395	0.034685
Bomo_Chr10	9772	10994	KWMTBOMO05392	23566	0.034679
Bomo_Chr10	11745	12565	KWMTBOMO05391	21395	0.022439
Bomo_Chr10	11745	12565	KWMTBOMO05392	23566	0.022435
Bomo_Chr10	20336	20836	KWMTBOMO05391	21395	0.022051
Bomo_Chr10	20336	20836	KWMTBOMO05392	23566	0.022047
Bomo_Chr10	82587	84072	KWMTBOMO05394	67635	0.025927
Bomo_Chr10	103742	106113	KWMTBOMO05394	67635	0.035557
Bomo_Chr10	246170	247682	KWMTBOMO05396	249475	0.024654
Bomo_Chr10	247785	248774	KWMTBOMO05396	249475	0.022366
Bomo_Chr10	553809	555373	KWMTBOMO05400	546005	0.030359
Bomo_Chr10	553809	555373	KWMTBOMO05401	549406	0.03034
Bomo_Chr10	553809	555373	KWMTBOMO05402	567985	0.025091
Bomo_Chr10	573291	575493	KWMTBOMO05402	567985	0.022759
Bomo_Chr10	589967	590507	KWMTBOMO05403	596916	0.027322
Bomo_Chr10	591267	591767	KWMTBOMO05403	596916	0.033805
Bomo_Chr10	607524	609397	KWMTBOMO05403	596916	0.043305
Bomo_Chr10	696294	697877	KWMTBOMO05405	707625	0.027766
Bomo_Chr10	696294	697877	KWMTBOMO05406	709425	0.027762
Bomo_Chr10	1193946	1195374	KWMTBOMO05409	1205246	0.048362
Bomo_Chr10	1195723	1196580	KWMTBOMO05409	1205246	0.053795
Bomo_Chr10	1196795	1197295	KWMTBOMO05409	1205246	0.047443
Bomo_Chr10	1235650	1236508	KWMTBOMO05410	1296231	0.020127
Bomo_Chr10	1239136	1239866	KWMTBOMO05410	1296231	0.020984
Bomo_Chr10	1400697	1401455	KWMTBOMO05414	1406781	0.022952
Bomo_Chr10	1432180	1433441	KWMTBOMO05411	1372571	0.023465
Bomo_Chr10	1432180	1433441	KWMTBOMO05412	1386280	0.029604
Bomo_Chr10	1432180	1433441	KWMTBOMO05413	1397291	0.024945
Bomo_Chr10	1432180	1433441	KWMTBOMO05414	1406781	0.041074
Bomo_Chr10	1565156	1566594	KWMTBOMO05415	1540830	0.021788
Bomo_Chr10	1565156	1566594	KWMTBOMO05416	1542131	0.021786
Bomo_Chr10	1565156	1566594	KWMTBOMO05418	1563840	0.029083
Bomo_Chr10	1567286	1568121	KWMTBOMO05418	1563840	0.023663
Bomo_Chr10	1568392	1569367	KWMTBOMO05415	1540830	0.021176
Bomo_Chr10	1568392	1569367	KWMTBOMO05416	1542131	0.021174
Bomo_Chr10	1568392	1569367	KWMTBOMO05418	1563840	0.028266
Bomo_Chr10	1849626	1850788	KWMTBOMO05429	1880336	0.020601
Bomo_Chr10	2060598	2061857	KWMTBOMO05432	2067356	0.02852
Bomo_Chr10	2068388	2068888	KWMTBOMO05432	2067356	0.024162
Bomo_Chr10	2201152	2201944	KWMTBOMO05435	2206073	0.093763
Bomo_Chr10	2201152	2201944	KWMTBOMO05436	2262812	0.032641
Bomo_Chr10	2201152	2201944	KWMTBOMO05437	2269133	0.032634
Bomo_Chr10	2264857	2265591	KWMTBOMO05436	2262812	0.022919
Bomo_Chr10	2264857	2265591	KWMTBOMO05437	2269133	0.022914
Bomo_Chr10	2265700	2266647	KWMTBOMO05436	2262812	0.024418
Bomo_Chr10	2265700	2266647	KWMTBOMO05437	2269133	0.024412
Bomo_Chr10	2267071	2268065	KWMTBOMO05436	2262812	0.034537
Bomo_Chr10	2267071	2268065	KWMTBOMO05437	2269133	0.034529
Bomo_Chr10	2361376	2362363	KWMTBOMO05441	2377373	0.021009
Bomo_Chr10	2365366	2365892	KWMTBOMO05441	2377373	0.022197
Bomo_Chr10	2366013	2366918	KWMTBOMO05441	2377373	0.032257
Bomo_Chr10	2460696	2461521	KWMTBOMO05447	2469963	0.023631
Bomo_Chr10	2585125	2586234	KWMTBOMO05453	2557024	0.023234
Bomo_Chr10	2585125	2586234	KWMTBOMO05455	2558345	0.023223
Bomo_Chr10	2585125	2586234	KWMTBOMO05456	2593734	0.029374
Bomo_Chr10	2603728	2604865	KWMTBOMO05456	2593734	0.044743
Bomo_Chr10	2700446	2703101	KWMTBOMO05458	2699075	0.029781
Bomo_Chr10	2811131	2812123	KWMTBOMO05391	21395	0.020221
Bomo_Chr10	2811131	2812123	KWMTBOMO05392	23566	0.020217
Bomo_Chr10	2811131	2812123	KWMTBOMO05461	2833714	0.056608
Bomo_Chr10	2811131	2812123	KWMTBOMO05464	2843395	0.03907
Bomo_Chr10	2823070	2823570	KWMTBOMO05461	2833714	0.030704
Bomo_Chr10	2917559	2918287	KWMTBOMO05465	2915844	0.023362
Bomo_Chr10	2919341	2922020	KWMTBOMO05465	2915844	0.0681
Bomo_Chr10	2919341	2922020	KWMTBOMO05466	2956140	0.038349
Bomo_Chr10	2919341	2922020	KWMTBOMO05467	2957311	0.038347
Bomo_Chr10	2919341	2922020	KWMTBOMO05469	2971790	0.022672
Bomo_Chr10	2919341	2922020	KWMTBOMO05470	2972821	0.022671
Bomo_Chr10	2929847	2931399	KWMTBOMO05465	2915844	0.025965
Bomo_Chr10	2929847	2931399	KWMTBOMO05466	2956140	0.02505
Bomo_Chr10	2929847	2931399	KWMTBOMO05467	2957311	0.025049
Bomo_Chr10	2933130	2934139	KWMTBOMO05465	2915844	0.021773
Bomo_Chr10	2933130	2934139	KWMTBOMO05466	2956140	0.021006
Bomo_Chr10	2933130	2934139	KWMTBOMO05467	2957311	0.021005
Bomo_Chr10	2948134	2949541	KWMTBOMO05466	2956140	0.026688
Bomo_Chr10	2948134	2949541	KWMTBOMO05467	2957311	0.026687
Bomo_Chr10	2949729	2951217	KWMTBOMO05466	2956140	0.049562
Bomo_Chr10	2949729	2951217	KWMTBOMO05467	2957311	0.049561
Bomo_Chr10	2949729	2951217	KWMTBOMO05469	2971790	0.035339
Bomo_Chr10	2949729	2951217	KWMTBOMO05470	2972821	0.035338
Bomo_Chr10	2949729	2951217	KWMTBOMO05471	2985161	0.021136
Bomo_Chr10	2949729	2951217	KWMTBOMO05472	2992380	0.020184
Bomo_Chr10	3064106	3064707	KWMTBOMO05478	3054690	0.024691
Bomo_Chr10	3064106	3064707	KWMTBOMO05479	3055411	0.02469
Bomo_Chr10	3095827	3096327	KWMTBOMO05480	3094620	0.02082
Bomo_Chr10	3095827	3096327	KWMTBOMO05481	3096880	0.020819
Bomo_Chr10	3095827	3096327	KWMTBOMO05482	3099091	0.020818
Bomo_Chr10	3605607	3606107	KWMTBOMO05499	3607356	0.025539
Bomo_Chr10	3658636	3659461	KWMTBOMO05502	3647717	0.026672
Bomo_Chr10	3709969	3710832	KWMTBOMO05503	3737182	0.047282
Bomo_Chr10	3738629	3740338	KWMTBOMO05503	3737182	0.029341
Bomo_Chr10	3820464	3822480	KWMTBOMO05506	3836532	0.021422
Bomo_Chr10	3861054	3861792	KWMTBOMO05506	3836532	0.027649
Bomo_Chr10	3861054	3861792	KWMTBOMO05507	3842613	0.041039
Bomo_Chr10	3861054	3861792	KWMTBOMO05508	3866192	0.070801
Bomo_Chr10	3861054	3861792	KWMTBOMO05509	3867033	0.0708
Bomo_Chr10	3861054	3861792	KWMTBOMO05510	3873153	0.068381
Bomo_Chr10	3861054	3861792	KWMTBOMO05511	3883982	0.04036
Bomo_Chr10	3861054	3861792	KWMTBOMO05512	3888343	0.04036
Bomo_Chr10	3885491	3887838	KWMTBOMO05508	3866192	0.032251
Bomo_Chr10	3885491	3887838	KWMTBOMO05509	3867033	0.032251
Bomo_Chr10	3885491	3887838	KWMTBOMO05510	3873153	0.047994
Bomo_Chr10	3885491	3887838	KWMTBOMO05511	3883982	0.050069
Bomo_Chr10	3885491	3887838	KWMTBOMO05512	3888343	0.050069
Bomo_Chr10	4021607	4022373	KWMTBOMO05515	4016223	0.032756
Bomo_Chr10	4142458	4143645	KWMTBOMO05518	4109133	0.022136
Bomo_Chr10	4142458	4143645	KWMTBOMO05519	4112643	0.025252
Bomo_Chr10	4142458	4143645	KWMTBOMO05520	4129572	0.036043
Bomo_Chr10	4142458	4143645	KWMTBOMO05521	4130063	0.055788
Bomo_Chr10	4142458	4143645	KWMTBOMO05522	4149512	0.057972
Bomo_Chr10	4220934	4222254	KWMTBOMO05524	4224618	0.046191
Bomo_Chr10	4220934	4222254	KWMTBOMO05525	4228337	0.046191
Bomo_Chr10	4271130	4271983	KWMTBOMO05527	4275258	0.03452
Bomo_Chr10	4271130	4271983	KWMTBOMO05528	4280107	0.021742
Bomo_Chr10	4278554	4279397	KWMTBOMO05527	4275258	0.034147
Bomo_Chr10	4278554	4279397	KWMTBOMO05528	4280107	0.021507
Bomo_Chr10	4281288	4282596	KWMTBOMO05526	4263677	0.025193
Bomo_Chr10	4281288	4282596	KWMTBOMO05527	4275258	0.040518
Bomo_Chr10	4281288	4282596	KWMTBOMO05528	4280107	0.073887
Bomo_Chr10	4281288	4282596	KWMTBOMO05530	4297958	0.037729
Bomo_Chr10	4281288	4282596	KWMTBOMO05531	4308637	0.021638
Bomo_Chr10	4284353	4286527	KWMTBOMO05526	4263677	0.027496
Bomo_Chr10	4284353	4286527	KWMTBOMO05527	4275258	0.044223
Bomo_Chr10	4284353	4286527	KWMTBOMO05528	4280107	0.080643
Bomo_Chr10	4284353	4286527	KWMTBOMO05530	4297958	0.041179
Bomo_Chr10	4284353	4286527	KWMTBOMO05531	4308637	0.023617
Bomo_Chr10	4380181	4380681	KWMTBOMO05535	4365347	0.024695
Bomo_Chr10	4380181	4380681	KWMTBOMO05536	4366437	0.024695
Bomo_Chr10	4380181	4380681	KWMTBOMO05537	4370517	0.039114
Bomo_Chr10	4380181	4380681	KWMTBOMO05538	4371308	0.039114
Bomo_Chr10	4380181	4380681	KWMTBOMO05539	4378237	0.039114
Bomo_Chr10	4380181	4380681	KWMTBOMO05540	4385257	0.047101
Bomo_Chr10	4380181	4380681	KWMTBOMO05541	4407837	0.028731
Bomo_Chr10	4381050	4381923	KWMTBOMO05535	4365347	0.029654
Bomo_Chr10	4381050	4381923	KWMTBOMO05536	4366437	0.029654
Bomo_Chr10	4381050	4381923	KWMTBOMO05537	4370517	0.046969
Bomo_Chr10	4381050	4381923	KWMTBOMO05538	4371308	0.046969
Bomo_Chr10	4381050	4381923	KWMTBOMO05539	4378237	0.046969
Bomo_Chr10	4381050	4381923	KWMTBOMO05540	4385257	0.056561
Bomo_Chr10	4381050	4381923	KWMTBOMO05541	4407837	0.034501
Bomo_Chr10	4381050	4381923	KWMTBOMO05543	4462528	0.020554
Bomo_Chr10	4381050	4381923	KWMTBOMO05544	4468287	0.020551
Bomo_Chr10	4382174	4382991	KWMTBOMO05537	4370517	0.0271
Bomo_Chr10	4382174	4382991	KWMTBOMO05538	4371308	0.0271
Bomo_Chr10	4382174	4382991	KWMTBOMO05539	4378237	0.0271
Bomo_Chr10	4382174	4382991	KWMTBOMO05540	4385257	0.032634
Bomo_Chr10	4383069	4383569	KWMTBOMO05537	4370517	0.021581
Bomo_Chr10	4383069	4383569	KWMTBOMO05538	4371308	0.02158
Bomo_Chr10	4383069	4383569	KWMTBOMO05539	4378237	0.02158
Bomo_Chr10	4383069	4383569	KWMTBOMO05540	4385257	0.025988
Bomo_Chr10	4669573	4670073	KWMTBOMO05549	4685106	0.02567
Bomo_Chr10	4669573	4670073	KWMTBOMO05550	4691947	0.024073
Bomo_Chr10	4670291	4671890	KWMTBOMO05549	4685106	0.053617
Bomo_Chr10	4670291	4671890	KWMTBOMO05550	4691947	0.031681
Bomo_Chr10	5194573	5196183	KWMTBOMO05565	5201541	0.02609
Bomo_Chr10	5194573	5196183	KWMTBOMO05566	5202642	0.026091
Bomo_Chr10	5194573	5196183	KWMTBOMO05567	5206642	0.026094
Bomo_Chr10	5224752	5225574	KWMTBOMO05568	5239461	0.021322
Bomo_Chr10	5251816	5254564	KWMTBOMO05569	5246902	0.035331
Bomo_Chr10	5766040	5766540	KWMTBOMO05596	5764311	0.02046
Bomo_Chr10	5766040	5766540	KWMTBOMO05597	5767431	0.020464
Bomo_Chr10	6122111	6123219	KWMTBOMO05605	6136445	0.026333
Bomo_Chr10	6154604	6156290	KWMTBOMO05605	6136445	0.026277
Bomo_Chr10	6154604	6156290	KWMTBOMO05606	6178445	0.026721
Bomo_Chr10	6213467	6214860	KWMTBOMO05607	6200634	0.053549
Bomo_Chr10	6213467	6214860	KWMTBOMO05608	6207485	0.053557
Bomo_Chr10	6276522	6278051	KWMTBOMO05609	6261085	0.041394
Bomo_Chr10	6298833	6299333	KWMTBOMO05610	6300165	0.02364
Bomo_Chr10	6298833	6299333	KWMTBOMO05611	6302654	0.023641
Bomo_Chr10	6298833	6299333	KWMTBOMO05612	6305755	0.023643
Bomo_Chr10	6303730	6304628	KWMTBOMO05610	6300165	0.026221
Bomo_Chr10	6303730	6304628	KWMTBOMO05611	6302654	0.026223
Bomo_Chr10	6303730	6304628	KWMTBOMO05612	6305755	0.026225
Bomo_Chr10	6303730	6304628	KWMTBOMO05613	6313905	0.021417
Bomo_Chr10	6306729	6307280	KWMTBOMO05610	6300165	0.026423
Bomo_Chr10	6306729	6307280	KWMTBOMO05611	6302654	0.026425
Bomo_Chr10	6306729	6307280	KWMTBOMO05612	6305755	0.026426
Bomo_Chr10	6306729	6307280	KWMTBOMO05613	6313905	0.021582
Bomo_Chr10	6564624	6565435	KWMTBOMO05619	6562559	0.031315
Bomo_Chr10	6589678	6590178	KWMTBOMO05620	6570619	0.022176
Bomo_Chr10	6589678	6590178	KWMTBOMO05621	6575608	0.022175
Bomo_Chr10	6589678	6590178	KWMTBOMO05623	6589129	0.022328
Bomo_Chr10	6590399	6590899	KWMTBOMO05624	6601758	0.021884
Bomo_Chr10	6590399	6590899	KWMTBOMO05625	6603499	0.021884
Bomo_Chr10	6599854	6600965	KWMTBOMO05624	6601758	0.028617
Bomo_Chr10	6599854	6600965	KWMTBOMO05625	6603499	0.028617
Bomo_Chr10	6734561	6736267	KWMTBOMO05629	6741368	0.041668
Bomo_Chr10	6754180	6755771	KWMTBOMO05629	6741368	0.035939
Bomo_Chr10	6889568	6890832	KWMTBOMO05631	6921422	0.022872
Bomo_Chr10	6889568	6890832	KWMTBOMO05632	6921422	0.022872
Bomo_Chr10	6889568	6890832	KWMTBOMO05633	6924393	0.022873
Bomo_Chr10	6902403	6903249	KWMTBOMO05631	6921422	0.020217
Bomo_Chr10	6902403	6903249	KWMTBOMO05632	6921422	0.020217
Bomo_Chr10	6902403	6903249	KWMTBOMO05633	6924393	0.020218
Bomo_Chr10	6991219	6991987	KWMTBOMO05635	6995123	0.025596
Bomo_Chr10	6991219	6991987	KWMTBOMO05636	7006442	0.026591
Bomo_Chr10	6991219	6991987	KWMTBOMO05637	7007503	0.026591
Bomo_Chr10	7089290	7091011	KWMTBOMO05644	7092132	0.025682
Bomo_Chr10	7526568	7527797	KWMTBOMO05664	7536812	0.021783
Bomo_Chr10	7552418	7553570	KWMTBOMO05665	7540093	0.026307
Bomo_Chr10	7552418	7553570	KWMTBOMO05666	7557142	0.029611
Bomo_Chr10	7552418	7553570	KWMTBOMO05667	7558423	0.029613
Bomo_Chr10	7666637	7668060	KWMTBOMO05671	7677742	0.040199
Bomo_Chr10	7723782	7724290	KWMTBOMO05671	7677742	0.035141
Bomo_Chr10	7724556	7726729	KWMTBOMO05665	7540093	0.037917
Bomo_Chr10	7724556	7726729	KWMTBOMO05669	7573172	0.049074
Bomo_Chr10	7724556	7726729	KWMTBOMO05670	7577233	0.049073
Bomo_Chr10	7724556	7726729	KWMTBOMO05671	7677742	0.094691
Bomo_Chr10	7724556	7726729	KWMTBOMO05675	7868767	0.047675
Bomo_Chr10	7724556	7726729	KWMTBOMO05685	8195532	0.023306
Bomo_Chr10	7724556	7726729	KWMTBOMO05686	8199411	0.02329
Bomo_Chr10	7724556	7726729	KWMTBOMO05689	8245001	0.022221
Bomo_Chr10	7724556	7726729	KWMTBOMO05690	8249251	0.022222
Bomo_Chr10	7724556	7726729	KWMTBOMO05696	8365672	0.022471
Bomo_Chr10	7727116	7728044	KWMTBOMO05671	7677742	0.021947
Bomo_Chr10	7813759	7814307	KWMTBOMO05673	7817968	0.044814
Bomo_Chr10	7841181	7842037	KWMTBOMO05674	7858347	0.021257
Bomo_Chr10	7869361	7869861	KWMTBOMO05674	7858347	0.024224
Bomo_Chr10	7869361	7869861	KWMTBOMO05675	7868767	0.024647
Bomo_Chr10	7916455	7917178	KWMTBOMO05678	7918247	0.052474
Bomo_Chr10	7916455	7917178	KWMTBOMO05679	7920678	0.052707
Bomo_Chr10	8147663	8148489	KWMTBOMO05681	8131052	0.027929
Bomo_Chr10	8157653	8158507	KWMTBOMO05683	8165422	0.027287
Bomo_Chr10	8157653	8158507	KWMTBOMO05684	8180632	0.020079
Bomo_Chr10	8304736	8306150	KWMTBOMO05693	8303521	0.02709
Bomo_Chr10	8304736	8306150	KWMTBOMO05694	8308312	0.027091
Bomo_Chr10	8304736	8306150	KWMTBOMO05695	8318131	0.024978
Bomo_Chr10	8352582	8353859	KWMTBOMO05696	8365672	0.052743
Bomo_Chr10	8533057	8534786	KWMTBOMO05700	8521022	0.021473
Bomo_Chr10	8533057	8534786	KWMTBOMO05701	8532451	0.021193
Bomo_Chr10	8533057	8534786	KWMTBOMO05702	8540991	0.020363
Bomo_Chr10	8533057	8534786	KWMTBOMO05703	8547332	0.020365
Bomo_Chr10	8549778	8550836	KWMTBOMO05702	8540991	0.020297
Bomo_Chr10	8549778	8550836	KWMTBOMO05703	8547332	0.020298
Bomo_Chr10	8574916	8575416	KWMTBOMO05707	8574031	0.028211
Bomo_Chr10	8574916	8575416	KWMTBOMO05708	8574172	0.028211
Bomo_Chr10	8575757	8576311	KWMTBOMO05707	8574031	0.022042
Bomo_Chr10	8575757	8576311	KWMTBOMO05708	8574172	0.022042
Bomo_Chr10	8578792	8579331	KWMTBOMO05707	8574031	0.020776
Bomo_Chr10	8578792	8579331	KWMTBOMO05708	8574172	0.020776
Bomo_Chr10	8579464	8580092	KWMTBOMO05707	8574031	0.032124
Bomo_Chr10	8579464	8580092	KWMTBOMO05708	8574172	0.032124
Bomo_Chr10	8583438	8585009	KWMTBOMO05701	8532451	0.021687
Bomo_Chr10	8583438	8585009	KWMTBOMO05702	8540991	0.026418
Bomo_Chr10	8583438	8585009	KWMTBOMO05703	8547332	0.02642
Bomo_Chr10	8583438	8585009	KWMTBOMO05704	8552192	0.031537
Bomo_Chr10	8583438	8585009	KWMTBOMO05705	8554872	0.031538
Bomo_Chr10	8583438	8585009	KWMTBOMO05707	8574031	0.073209
Bomo_Chr10	8583438	8585009	KWMTBOMO05708	8574172	0.073209
Bomo_Chr10	8583438	8585009	KWMTBOMO05709	8592846	0.070283
Bomo_Chr10	8583438	8585009	KWMTBOMO05711	8610796	0.029927
Bomo_Chr10	8583438	8585009	KWMTBOMO05712	8630675	0.020587
Bomo_Chr10	8585322	8586178	KWMTBOMO05707	8574031	0.022806
Bomo_Chr10	8585322	8586178	KWMTBOMO05708	8574172	0.022806
Bomo_Chr10	8585322	8586178	KWMTBOMO05709	8592846	0.021894
Bomo_Chr10	8594406	8595470	KWMTBOMO05709	8592846	0.054979
Bomo_Chr10	8632858	8633467	KWMTBOMO05712	8630675	0.029568
Bomo_Chr10	8701976	8703464	KWMTBOMO05717	8697595	0.029941
Bomo_Chr10	8701976	8703464	KWMTBOMO05718	8712736	0.026727
Bomo_Chr10	8703675	8705848	KWMTBOMO05715	8672545	0.025978
Bomo_Chr10	8703675	8705848	KWMTBOMO05716	8674606	0.025979
Bomo_Chr10	8703675	8705848	KWMTBOMO05717	8697595	0.063528
Bomo_Chr10	8703675	8705848	KWMTBOMO05718	8712736	0.05671
Bomo_Chr10	8703675	8705848	KWMTBOMO05719	8727805	0.034558
Bomo_Chr10	8707887	8709002	KWMTBOMO05717	8697595	0.023717
Bomo_Chr10	8707887	8709002	KWMTBOMO05718	8712736	0.021172
Bomo_Chr10	8709125	8709664	KWMTBOMO05717	8697595	0.020897
Bomo_Chr10	8755588	8757085	KWMTBOMO05720	8752655	0.038337
Bomo_Chr10	8755588	8757085	KWMTBOMO05721	8753076	0.038337
Bomo_Chr10	8846165	8850013	KWMTBOMO05724	8813886	0.025655
Bomo_Chr10	8846165	8850013	KWMTBOMO05725	8834516	0.076947
Bomo_Chr10	8846165	8850013	KWMTBOMO05726	8853376	0.06233
Bomo_Chr10	8846165	8850013	KWMTBOMO05727	8862756	0.03874
Bomo_Chr10	8846165	8850013	KWMTBOMO05728	8904655	0.020658
Bomo_Chr10	8867696	8868284	KWMTBOMO05726	8853376	0.020198
Bomo_Chr10	8867696	8868284	KWMTBOMO05727	8862756	0.021735
Bomo_Chr10	8902559	8903467	KWMTBOMO05728	8904655	0.021989
Bomo_Chr10	8918055	8919973	KWMTBOMO05728	8904655	0.05063
Bomo_Chr10	8918055	8919973	KWMTBOMO05729	8928145	0.048876
Bomo_Chr10	8918055	8919973	KWMTBOMO05730	8933116	0.029443
Bomo_Chr10	8918055	8919973	KWMTBOMO05731	8947706	0.029045
Bomo_Chr10	8918055	8919973	KWMTBOMO05732	8952616	0.022535
Bomo_Chr10	9049561	9050468	KWMTBOMO05736	9044536	0.025162
Bomo_Chr10	9114993	9116276	KWMTBOMO05739	9081504	0.023188
Bomo_Chr10	9114993	9116276	KWMTBOMO05740	9089895	0.023177
Bomo_Chr10	9114993	9116276	KWMTBOMO05741	9113074	0.063835
Bomo_Chr10	9114993	9116276	KWMTBOMO05742	9121945	0.057441
Bomo_Chr10	9181851	9183058	KWMTBOMO05744	9179605	0.021158
Bomo_Chr10	9287626	9288622	KWMTBOMO05747	9287004	0.028707
Bomo_Chr10	9287626	9288622	KWMTBOMO05748	9290205	0.020142
Bomo_Chr10	9291007	9291746	KWMTBOMO05748	9290205	0.020705
Bomo_Chr10	9291007	9291746	KWMTBOMO05749	9303494	0.021415
Bomo_Chr10	9291007	9291746	KWMTBOMO05750	9306505	0.021417
Bomo_Chr10	9310529	9311605	KWMTBOMO05751	9318924	0.023464
Bomo_Chr10	9325209	9326062	KWMTBOMO05751	9318924	0.039175
Bomo_Chr10	9394234	9395165	KWMTBOMO05752	9380955	0.041979
Bomo_Chr10	9394234	9395165	KWMTBOMO05753	9401445	0.026591
Bomo_Chr10	9395942	9397075	KWMTBOMO05752	9380955	0.051327
Bomo_Chr10	9395942	9397075	KWMTBOMO05753	9401445	0.032512
Bomo_Chr10	9429122	9429806	KWMTBOMO05755	9424724	0.027974
Bomo_Chr10	9429122	9429806	KWMTBOMO05756	9427785	0.02798
Bomo_Chr10	9473759	9475657	KWMTBOMO05759	9483398	0.023949
Bomo_Chr10	9473759	9475657	KWMTBOMO05760	9487227	0.02395
Bomo_Chr10	9544390	9546170	KWMTBOMO05763	9535377	0.029919
Bomo_Chr10	9544390	9546170	KWMTBOMO05764	9537228	0.02992
Bomo_Chr10	9544390	9546170	KWMTBOMO05765	9553547	0.051936
Bomo_Chr10	9548621	9549543	KWMTBOMO05765	9553547	0.021049
Bomo_Chr10	9811863	9812810	KWMTBOMO05776	9815405	0.022767
Bomo_Chr10	9862912	9864307	KWMTBOMO05781	9878855	0.045884
Bomo_Chr10	9867247	9867994	KWMTBOMO05781	9878855	0.030396
Bomo_Chr10	10030113	10031177	KWMTBOMO05787	10020935	0.036524
Bomo_Chr10	10030113	10031177	KWMTBOMO05788	10022256	0.036525
Bomo_Chr10	10030113	10031177	KWMTBOMO05789	10054175	0.020953
Bomo_Chr10	10030113	10031177	KWMTBOMO05790	10059146	0.020955
Bomo_Chr10	10032892	10034015	KWMTBOMO05787	10020935	0.047379
Bomo_Chr10	10032892	10034015	KWMTBOMO05788	10022256	0.047381
Bomo_Chr10	10032892	10034015	KWMTBOMO05789	10054175	0.027181
Bomo_Chr10	10032892	10034015	KWMTBOMO05790	10059146	0.027183
Bomo_Chr10	10043434	10044904	KWMTBOMO05787	10020935	0.027315
Bomo_Chr10	10043434	10044904	KWMTBOMO05788	10022256	0.027316
Bomo_Chr10	10043434	10044904	KWMTBOMO05789	10054175	0.039923
Bomo_Chr10	10043434	10044904	KWMTBOMO05790	10059146	0.039926
Bomo_Chr10	10157121	10158068	KWMTBOMO05791	10154225	0.022532
Bomo_Chr10	10157121	10158068	KWMTBOMO05792	10161056	0.022091
Bomo_Chr10	10157121	10158068	KWMTBOMO05793	10169235	0.022124
Bomo_Chr10	10166652	10167526	KWMTBOMO05791	10154225	0.027649
Bomo_Chr10	10166652	10167526	KWMTBOMO05792	10161056	0.027108
Bomo_Chr10	10166652	10167526	KWMTBOMO05793	10169235	0.027148
Bomo_Chr10	10315811	10317018	KWMTBOMO05796	10302930	0.020402
Bomo_Chr10	10468855	10469583	KWMTBOMO05804	10460040	0.029326
Bomo_Chr10	10468855	10469583	KWMTBOMO05805	10462401	0.029329
Bomo_Chr10	10468855	10469583	KWMTBOMO05806	10470901	0.029081
Bomo_Chr10	10666556	10667368	KWMTBOMO05809	10636641	0.022802
Bomo_Chr10	10666556	10667368	KWMTBOMO05810	10639231	0.022805
Bomo_Chr10	10666556	10667368	KWMTBOMO05811	10659710	0.034865
Bomo_Chr10	10666556	10667368	KWMTBOMO05812	10669121	0.038948
Bomo_Chr10	10699803	10700985	KWMTBOMO05814	10698641	0.036395
Bomo_Chr10	10699803	10700985	KWMTBOMO05813	10706100	0.034794
Bomo_Chr10	10699803	10700985	KWMTBOMO05815	10712350	0.031897
Bomo_Chr10	10699803	10700985	KWMTBOMO05816	10719071	0.031904
Bomo_Chr10	10706798	10708235	KWMTBOMO05814	10698641	0.06964
Bomo_Chr10	10706798	10708235	KWMTBOMO05813	10706100	0.066577
Bomo_Chr10	10706798	10708235	KWMTBOMO05815	10712350	0.061033
Bomo_Chr10	10706798	10708235	KWMTBOMO05816	10719071	0.061047
Bomo_Chr10	10708421	10709262	KWMTBOMO05814	10698641	0.030456
Bomo_Chr10	10708421	10709262	KWMTBOMO05813	10706100	0.029116
Bomo_Chr10	10708421	10709262	KWMTBOMO05815	10712350	0.026691
Bomo_Chr10	10708421	10709262	KWMTBOMO05816	10719071	0.026697
Bomo_Chr10	10713555	10714295	KWMTBOMO05812	10669121	0.02955
Bomo_Chr10	10713555	10714295	KWMTBOMO05814	10698641	0.041446
Bomo_Chr10	10713555	10714295	KWMTBOMO05813	10706100	0.093374
Bomo_Chr10	10713555	10714295	KWMTBOMO05815	10712350	0.121184
Bomo_Chr10	10713555	10714295	KWMTBOMO05816	10719071	0.121212
Bomo_Chr10	10713555	10714295	KWMTBOMO05820	10802210	0.022178
Bomo_Chr10	10713555	10714295	KWMTBOMO05821	10803531	0.022179
Bomo_Chr10	10714487	10714987	KWMTBOMO05815	10712350	0.021878
Bomo_Chr10	10714487	10714987	KWMTBOMO05816	10719071	0.021883
Bomo_Chr10	10716371	10716871	KWMTBOMO05813	10706100	0.020605
Bomo_Chr10	10716371	10716871	KWMTBOMO05815	10712350	0.026742
Bomo_Chr10	10716371	10716871	KWMTBOMO05816	10719071	0.026748
Bomo_Chr10	10717214	10718000	KWMTBOMO05814	10698641	0.021706
Bomo_Chr10	10717214	10718000	KWMTBOMO05813	10706100	0.048901
Bomo_Chr10	10717214	10718000	KWMTBOMO05815	10712350	0.063465
Bomo_Chr10	10717214	10718000	KWMTBOMO05816	10719071	0.06348
Bomo_Chr10	10728692	10729522	KWMTBOMO05815	10712350	0.023044
Bomo_Chr10	10728692	10729522	KWMTBOMO05816	10719071	0.02305
Bomo_Chr10	10822426	10823225	KWMTBOMO05820	10802210	0.030025
Bomo_Chr10	10822426	10823225	KWMTBOMO05821	10803531	0.030027
Bomo_Chr10	11504500	11506086	KWMTBOMO05830	11499262	0.027826
Bomo_Chr10	11504500	11506086	KWMTBOMO05832	11507963	0.027085
Bomo_Chr10	11504500	11506086	KWMTBOMO05833	11517223	0.027249
Bomo_Chr10	11793159	11793923	KWMTBOMO05838	11797261	0.022867
Bomo_Chr10	11870403	11871620	KWMTBOMO05841	11878771	0.026045
Bomo_Chr10	12469631	12470543	KWMTBOMO05849	12471941	0.023163
Bomo_Chr10	12469631	12470543	KWMTBOMO05850	12475820	0.023162
Bomo_Chr10	12469631	12470543	KWMTBOMO05851	12477711	0.023163
Bomo_Chr10	12596483	12597340	KWMTBOMO05855	12603885	0.031113
Bomo_Chr10	12596483	12597340	KWMTBOMO05856	12605256	0.031114
Bomo_Chr10	12647604	12648451	KWMTBOMO05860	12645226	0.021639
Bomo_Chr10	12648588	12649547	KWMTBOMO05860	12645226	0.022908
Bomo_Chr10	12891186	12891686	KWMTBOMO05863	12892361	0.023491
Bomo_Chr10	12993075	12994685	KWMTBOMO05866	12997160	0.054471
Bomo_Chr10	12993075	12994685	KWMTBOMO05867	13002500	0.053438
Bomo_Chr10	12994986	12995779	KWMTBOMO05866	12997160	0.038703
Bomo_Chr10	12994986	12995779	KWMTBOMO05867	13002500	0.037969
Bomo_Chr10	13046478	13047997	KWMTBOMO05871	13030210	0.02507
Bomo_Chr10	13046478	13047997	KWMTBOMO05872	13038260	0.02507
Bomo_Chr10	13046478	13047997	KWMTBOMO05873	13075960	0.040762
Bomo_Chr10	13050445	13050945	KWMTBOMO05871	13030210	0.02397
Bomo_Chr10	13050445	13050945	KWMTBOMO05872	13038260	0.02397
Bomo_Chr10	13053125	13053625	KWMTBOMO05871	13030210	0.021066
Bomo_Chr10	13053125	13053625	KWMTBOMO05872	13038260	0.021066
Bomo_Chr10	13059107	13059607	KWMTBOMO05871	13030210	0.030583
Bomo_Chr10	13059107	13059607	KWMTBOMO05872	13038260	0.030583
Bomo_Chr10	13059709	13060209	KWMTBOMO05871	13030210	0.020387
Bomo_Chr10	13059709	13060209	KWMTBOMO05872	13038260	0.020387
Bomo_Chr10	13198341	13198841	KWMTBOMO05877	13180770	0.038601
Bomo_Chr10	13198341	13198841	KWMTBOMO05878	13196931	0.035933
Bomo_Chr10	13198884	13199384	KWMTBOMO05877	13180770	0.022124
Bomo_Chr10	13198884	13199384	KWMTBOMO05878	13196931	0.020595
Bomo_Chr10	13199753	13200253	KWMTBOMO05878	13196931	0.02858
Bomo_Chr10	13200807	13201625	KWMTBOMO05878	13196931	0.021868
Bomo_Chr10	13201722	13202480	KWMTBOMO05877	13180770	0.026517
Bomo_Chr10	13201722	13202480	KWMTBOMO05878	13196931	0.052386
Bomo_Chr10	13201722	13202480	KWMTBOMO05879	13241210	0.035062
Bomo_Chr10	13201722	13202480	KWMTBOMO05881	13267970	0.029233
Bomo_Chr10	13201722	13202480	KWMTBOMO05882	13361746	0.023694
Bomo_Chr10	13440710	13442443	KWMTBOMO05884	13443036	0.031481
Bomo_Chr10	13440710	13442443	KWMTBOMO05885	13456095	0.02979
Bomo_Chr10	13604825	13605668	KWMTBOMO05895	13603865	0.020798
Bomo_Chr10	13604825	13605668	KWMTBOMO05896	13607266	0.020803
Bomo_Chr10	13777182	13777974	KWMTBOMO05899	13775360	0.02683
Bomo_Chr10	13778931	13779727	KWMTBOMO05899	13775360	0.023412
Bomo_Chr10	14149510	14150672	KWMTBOMO05904	14146195	0.037644
Bomo_Chr10	14149510	14150672	KWMTBOMO05905	14146366	0.037644
Bomo_Chr10	14380877	14381733	KWMTBOMO05917	14374786	0.020986
Bomo_Chr10	14380877	14381733	KWMTBOMO05918	14389805	0.021808
Bomo_Chr10	14382183	14383178	KWMTBOMO05917	14374786	0.029519
Bomo_Chr10	14382183	14383178	KWMTBOMO05918	14389805	0.030675
Bomo_Chr10	14405362	14405862	KWMTBOMO05919	14391016	0.032167
Bomo_Chr10	14405362	14405862	KWMTBOMO05920	14406395	0.031749
Bomo_Chr10	14405362	14405862	KWMTBOMO05921	14407166	0.031749
Bomo_Chr10	14405362	14405862	KWMTBOMO05922	14417905	0.028202
Bomo_Chr10	14526200	14526747	KWMTBOMO05926	14514294	0.024179
Bomo_Chr10	14526200	14526747	KWMTBOMO05927	14516725	0.02418
Bomo_Chr10	14555209	14556855	KWMTBOMO05926	14514294	0.030013
Bomo_Chr10	14555209	14556855	KWMTBOMO05927	14516725	0.030013
Bomo_Chr10	14555209	14556855	KWMTBOMO05928	14561024	0.058378
Bomo_Chr10	14555209	14556855	KWMTBOMO05929	14565645	0.058382
Bomo_Chr10	14555209	14556855	KWMTBOMO05930	14569035	0.058392
Bomo_Chr10	14562406	14563289	KWMTBOMO05928	14561024	0.022302
Bomo_Chr10	14562406	14563289	KWMTBOMO05929	14565645	0.022304
Bomo_Chr10	14562406	14563289	KWMTBOMO05930	14569035	0.022308
Bomo_Chr10	14576100	14577552	KWMTBOMO05928	14561024	0.02218
Bomo_Chr10	14576100	14577552	KWMTBOMO05929	14565645	0.022182
Bomo_Chr10	14576100	14577552	KWMTBOMO05930	14569035	0.022186
Bomo_Chr10	14619661	14620837	KWMTBOMO05931	14618685	0.038977
Bomo_Chr10	15322992	15323492	KWMTBOMO05950	15307950	0.021651
Bomo_Chr10	15322992	15323492	KWMTBOMO05951	15310241	0.034762
Bomo_Chr10	15322992	15323492	KWMTBOMO05954	15350220	0.020318
Bomo_Chr10	15323509	15324476	KWMTBOMO05950	15307950	0.030402
Bomo_Chr10	15323509	15324476	KWMTBOMO05951	15310241	0.048813
Bomo_Chr10	15323509	15324476	KWMTBOMO05954	15350220	0.028531
Bomo_Chr10	15324493	15325665	KWMTBOMO05950	15307950	0.038031
Bomo_Chr10	15324493	15325665	KWMTBOMO05951	15310241	0.061062
Bomo_Chr10	15324493	15325665	KWMTBOMO05954	15350220	0.03569
Bomo_Chr10	15325689	15326189	KWMTBOMO05950	15307950	0.020956
Bomo_Chr10	15325689	15326189	KWMTBOMO05951	15310241	0.033647
Bomo_Chr10	15357508	15358967	KWMTBOMO05954	15350220	0.024761
Bomo_Chr10	15610322	15611226	KWMTBOMO05967	15609497	0.033847
Bomo_Chr10	15610322	15611226	KWMTBOMO05968	15612288	0.03751
Bomo_Chr10	15681032	15682047	KWMTBOMO05976	15680517	0.028999
Bomo_Chr10	15681032	15682047	KWMTBOMO05977	15682678	0.029
Bomo_Chr10	15742028	15743729	KWMTBOMO05982	15733838	0.023396
Bomo_Chr10	15776992	15777738	KWMTBOMO05985	15770918	0.030232
Bomo_Chr10	15799958	15801349	KWMTBOMO05986	15798567	0.033831
Bomo_Chr10	15799958	15801349	KWMTBOMO05987	15804728	0.036671
Bomo_Chr10	15805977	15806477	KWMTBOMO05987	15804728	0.020357
Bomo_Chr10	15810071	15811858	KWMTBOMO05987	15804728	0.02238
Bomo_Chr10	15812591	15813494	KWMTBOMO05986	15798567	0.033122
Bomo_Chr10	15812591	15813494	KWMTBOMO05987	15804728	0.062323
Bomo_Chr10	15813578	15814078	KWMTBOMO05987	15804728	0.025628
Bomo_Chr10	15828538	15829499	KWMTBOMO05988	15836738	0.022431
Bomo_Chr10	15829592	15830545	KWMTBOMO05988	15836738	0.025713
Bomo_Chr10	15921695	15923015	KWMTBOMO05997	15934528	0.028948
Bomo_Chr10	15948132	15949094	KWMTBOMO05997	15934528	0.039229
Bomo_Chr10	16055556	16056056	KWMTBOMO06009	16060881	0.022181
Bomo_Chr10	16055556	16056056	KWMTBOMO06010	16061302	0.022183
Bomo_Chr10	16055556	16056056	KWMTBOMO06011	16068682	0.022189
Bomo_Chr10	16087691	16088191	KWMTBOMO06012	16088801	0.029211
Bomo_Chr10	16091841	16094156	KWMTBOMO06012	16088801	0.04367
Bomo_Chr10	16695104	16695848	KWMTBOMO06025	16699892	0.023656
Bomo_Chr10	16744896	16746316	KWMTBOMO06026	16742742	0.035584
Bomo_Chr10	16744896	16746316	KWMTBOMO06027	16746961	0.035597
Bomo_Chr10	16744896	16746316	KWMTBOMO06028	16749032	0.0356
Bomo_Chr10	16749994	16750800	KWMTBOMO06026	16742742	0.022709
Bomo_Chr10	16749994	16750800	KWMTBOMO06027	16746961	0.022717
Bomo_Chr10	16749994	16750800	KWMTBOMO06028	16749032	0.022719
Bomo_Chr10	16749994	16750800	KWMTBOMO06029	16771981	0.023842
Bomo_Chr10	16749994	16750800	KWMTBOMO06030	16789011	0.022869
Bomo_Chr10	16815209	16817182	KWMTBOMO06032	16819226	0.022081
Bomo_Chr10	16835347	16836165	KWMTBOMO06034	16836815	0.025416
Bomo_Chr10	16844215	16845040	KWMTBOMO06035	16843136	0.034783
Bomo_Chr10	16845084	16846471	KWMTBOMO06034	16836815	0.020759
Bomo_Chr10	16845084	16846471	KWMTBOMO06035	16843136	0.045309
Bomo_Chr10	16845084	16846471	KWMTBOMO06036	16868145	0.020728
Bomo_Chr10	16866492	16866992	KWMTBOMO06036	16868145	0.021098
Bomo_Chr10	16868763	16869591	KWMTBOMO06036	16868145	0.035269
Bomo_Chr10	16868763	16869591	KWMTBOMO06037	16870856	0.024183
Bomo_Chr10	16871864	16872679	KWMTBOMO06036	16868145	0.022116
Bomo_Chr10	16871864	16872679	KWMTBOMO06037	16870856	0.029709
Bomo_Chr10	16893978	16894478	KWMTBOMO06038	16893156	0.023103
Bomo_Chr10	16917236	16918313	KWMTBOMO06039	16912165	0.026503
Bomo_Chr10	16917236	16918313	KWMTBOMO06040	16913376	0.026505
Bomo_Chr10	16919036	16920979	KWMTBOMO06039	16912165	0.024053
Bomo_Chr10	16919036	16920979	KWMTBOMO06040	16913376	0.024055
Bomo_Chr10	17048803	17050203	KWMTBOMO06046	17032475	0.020473
Bomo_Chr10	17048803	17050203	KWMTBOMO06047	17036326	0.020476
Bomo_Chr10	17048803	17050203	KWMTBOMO06049	17045895	0.022659
Bomo_Chr10	17048803	17050203	KWMTBOMO06050	17047236	0.022661
Bomo_Chr10	17075561	17077183	KWMTBOMO06046	17032475	0.025786
Bomo_Chr10	17075561	17077183	KWMTBOMO06047	17036326	0.02579
Bomo_Chr10	17075561	17077183	KWMTBOMO06049	17045895	0.029409
Bomo_Chr10	17075561	17077183	KWMTBOMO06050	17047236	0.029412
Bomo_Chr10	17075561	17077183	KWMTBOMO06052	17078875	0.077598
Bomo_Chr10	17075561	17077183	KWMTBOMO06053	17079066	0.077599
Bomo_Chr10	17075561	17077183	KWMTBOMO06054	17125195	0.024236
Bomo_Chr10	17075561	17077183	KWMTBOMO06055	17125296	0.024236
Bomo_Chr10	17111416	17113319	KWMTBOMO06054	17125195	0.038021
Bomo_Chr10	17111416	17113319	KWMTBOMO06055	17125296	0.038021
Bomo_Chr10	17144513	17145013	KWMTBOMO06054	17125195	0.022212
Bomo_Chr10	17144513	17145013	KWMTBOMO06055	17125296	0.022212
Bomo_Chr10	17144513	17145013	KWMTBOMO06057	17145515	0.026313
Bomo_Chr10	17152246	17153971	KWMTBOMO06057	17145515	0.028626
Bomo_Chr10	17519644	17521250	KWMTBOMO06068	17511955	0.024176
Bomo_Chr10	17546314	17546814	KWMTBOMO06068	17511955	0.0332
Bomo_Chr10	17546314	17546814	KWMTBOMO06069	17545084	0.038153
Bomo_Chr10	17547434	17548646	KWMTBOMO06059	17239255	0.037386
Bomo_Chr10	17547434	17548646	KWMTBOMO06068	17511955	0.10059
Bomo_Chr10	17547434	17548646	KWMTBOMO06069	17545084	0.115599
Bomo_Chr10	17547434	17548646	KWMTBOMO06071	17574215	0.034898
Bomo_Chr10	17549055	17551884	KWMTBOMO05909	14227765	0.023044
Bomo_Chr10	17549055	17551884	KWMTBOMO05910	14229396	0.023051
Bomo_Chr10	17549055	17551884	KWMTBOMO05951	15310241	0.045488
Bomo_Chr10	17549055	17551884	KWMTBOMO06012	16088801	0.029398
Bomo_Chr10	17549055	17551884	KWMTBOMO06018	16211701	0.039309
Bomo_Chr10	17549055	17551884	KWMTBOMO06026	16742742	0.024656
Bomo_Chr10	17549055	17551884	KWMTBOMO06027	16746961	0.024665
Bomo_Chr10	17549055	17551884	KWMTBOMO06028	16749032	0.024667
Bomo_Chr10	17549055	17551884	KWMTBOMO06030	16789011	0.037356
Bomo_Chr10	17549055	17551884	KWMTBOMO06036	16868145	0.026623
Bomo_Chr10	17549055	17551884	KWMTBOMO06037	16870856	0.053374
Bomo_Chr10	17549055	17551884	KWMTBOMO06038	16893156	0.039042
Bomo_Chr10	17549055	17551884	KWMTBOMO06039	16912165	0.02813
Bomo_Chr10	17549055	17551884	KWMTBOMO06040	16913376	0.028131
Bomo_Chr10	17549055	17551884	KWMTBOMO06046	17032475	0.028062
Bomo_Chr10	17549055	17551884	KWMTBOMO06047	17036326	0.028066
Bomo_Chr10	17549055	17551884	KWMTBOMO06057	17145515	0.034677
Bomo_Chr10	17549055	17551884	KWMTBOMO06059	17239255	0.059959
Bomo_Chr10	17549055	17551884	KWMTBOMO06068	17511955	0.310258
Bomo_Chr10	17549055	17551884	KWMTBOMO06069	17545084	0.446526
Bomo_Chr10	17549055	17551884	KWMTBOMO06071	17574215	0.346513
Bomo_Chr10	17551947	17552524	KWMTBOMO06068	17511955	0.044726
Bomo_Chr10	17551947	17552524	KWMTBOMO06069	17545084	0.064371
Bomo_Chr10	17551947	17552524	KWMTBOMO06071	17574215	0.049953
Bomo_Chr10	17566662	17568355	KWMTBOMO06071	17574215	0.031836
Bomo_Chr10	17568792	17569489	KWMTBOMO06071	17574215	0.020046
Bomo_Chr11	31703	32679	KWMTBOMO06073	33415	0.030766
Bomo_Chr11	33976	35390	KWMTBOMO06073	33415	0.035428
Bomo_Chr11	35538	36462	KWMTBOMO06073	33415	0.02386
Bomo_Chr11	45604	46989	KWMTBOMO06073	33415	0.039625
Bomo_Chr11	123220	124371	KWMTBOMO06080	110536	0.036967
Bomo_Chr11	123220	124371	KWMTBOMO06081	139845	0.020839
Bomo_Chr11	126466	128029	KWMTBOMO06080	110536	0.02187
Bomo_Chr11	129290	130031	KWMTBOMO06080	110536	0.022457
Bomo_Chr11	131942	133414	KWMTBOMO06081	139845	0.023316
Bomo_Chr11	136631	137694	KWMTBOMO06080	110536	0.021488
Bomo_Chr11	136631	137694	KWMTBOMO06081	139845	0.02703
Bomo_Chr11	136631	137694	KWMTBOMO06082	145035	0.021891
Bomo_Chr11	136631	137694	KWMTBOMO06083	147695	0.021885
Bomo_Chr11	145709	146935	KWMTBOMO06081	139845	0.031577
Bomo_Chr11	145709	146935	KWMTBOMO06082	145035	0.044747
Bomo_Chr11	145709	146935	KWMTBOMO06083	147695	0.044735
Bomo_Chr11	145709	146935	KWMTBOMO06086	177164	0.024552
Bomo_Chr11	145709	146935	KWMTBOMO06087	178525	0.024549
Bomo_Chr11	159599	160504	KWMTBOMO06082	145035	0.020581
Bomo_Chr11	159599	160504	KWMTBOMO06083	147695	0.020575
Bomo_Chr11	159599	160504	KWMTBOMO06086	177164	0.033733
Bomo_Chr11	159599	160504	KWMTBOMO06087	178525	0.03373
Bomo_Chr11	240377	240877	KWMTBOMO06092	245734	0.02201
Bomo_Chr11	240377	240877	KWMTBOMO06093	247585	0.022007
Bomo_Chr11	242367	243596	KWMTBOMO06092	245734	0.026517
Bomo_Chr11	242367	243596	KWMTBOMO06093	247585	0.026514
Bomo_Chr11	324749	326351	KWMTBOMO06097	324164	0.028999
Bomo_Chr11	324749	326351	KWMTBOMO06099	338534	0.028154
Bomo_Chr11	538233	538999	KWMTBOMO06106	536584	0.025076
Bomo_Chr11	538233	538999	KWMTBOMO06107	543834	0.023596
Bomo_Chr11	538233	538999	KWMTBOMO06108	545005	0.023592
Bomo_Chr11	572796	574015	KWMTBOMO06109	560384	0.042507
Bomo_Chr11	572796	574015	KWMTBOMO06110	562085	0.042502
Bomo_Chr11	574187	576064	KWMTBOMO06109	560384	0.035541
Bomo_Chr11	574187	576064	KWMTBOMO06110	562085	0.035537
Bomo_Chr11	748531	749067	KWMTBOMO06122	729374	0.022401
Bomo_Chr11	748531	749067	KWMTBOMO06123	729925	0.0224
Bomo_Chr11	748531	749067	KWMTBOMO06124	753204	0.042987
Bomo_Chr11	748531	749067	KWMTBOMO06125	753485	0.042986
Bomo_Chr11	749835	751486	KWMTBOMO06124	753204	0.030377
Bomo_Chr11	749835	751486	KWMTBOMO06125	753485	0.030376
Bomo_Chr11	818834	819803	KWMTBOMO06128	807535	0.036686
Bomo_Chr11	847114	848302	KWMTBOMO06129	839674	0.042958
Bomo_Chr11	847114	848302	KWMTBOMO06130	868324	0.025089
Bomo_Chr11	869159	869718	KWMTBOMO06130	868324	0.021202
Bomo_Chr11	890143	891255	KWMTBOMO06134	892205	0.022699
Bomo_Chr11	1007649	1008434	KWMTBOMO06140	1001255	0.048562
Bomo_Chr11	1058740	1060301	KWMTBOMO06142	1182843	0.025892
Bomo_Chr11	1064402	1065688	KWMTBOMO06142	1182843	0.059728
Bomo_Chr11	1176244	1177707	KWMTBOMO06142	1182843	0.041543
Bomo_Chr11	1196353	1197291	KWMTBOMO06142	1182843	0.020878
Bomo_Chr11	1213870	1215125	KWMTBOMO06143	1220923	0.047463
Bomo_Chr11	1213870	1215125	KWMTBOMO06144	1221754	0.047462
Bomo_Chr11	1237162	1238447	KWMTBOMO06143	1220923	0.034769
Bomo_Chr11	1237162	1238447	KWMTBOMO06144	1221754	0.034767
Bomo_Chr11	1457065	1458489	KWMTBOMO06152	1454464	0.027916
Bomo_Chr11	1607364	1608745	KWMTBOMO06159	1602821	0.024265
Bomo_Chr11	1609776	1610867	KWMTBOMO06159	1602821	0.026084
Bomo_Chr11	1687310	1688432	KWMTBOMO06162	1681091	0.03663
Bomo_Chr11	1687310	1688432	KWMTBOMO06163	1689921	0.036616
Bomo_Chr11	1703143	1704574	KWMTBOMO06162	1681091	0.035373
Bomo_Chr11	1703143	1704574	KWMTBOMO06163	1689921	0.03536
Bomo_Chr11	1703143	1704574	KWMTBOMO06165	1716810	0.06554
Bomo_Chr11	1703143	1704574	KWMTBOMO06166	1725151	0.037507
Bomo_Chr11	1732868	1734050	KWMTBOMO06166	1725151	0.021915
Bomo_Chr11	1894645	1895145	KWMTBOMO06173	1891780	0.022944
Bomo_Chr11	1894645	1895145	KWMTBOMO06174	1893381	0.022942
Bomo_Chr11	1894645	1895145	KWMTBOMO06176	1908811	0.023843
Bomo_Chr11	1965040	1966413	KWMTBOMO06180	1963630	0.020764
Bomo_Chr11	1996436	1997267	KWMTBOMO06183	1994500	0.032811
Bomo_Chr11	1996436	1997267	KWMTBOMO06184	2004830	0.025574
Bomo_Chr11	1996436	1997267	KWMTBOMO06185	2006551	0.025572
Bomo_Chr11	2040805	2042117	KWMTBOMO06188	2031911	0.060778
Bomo_Chr11	2040805	2042117	KWMTBOMO06189	2060941	0.02403
Bomo_Chr11	2040805	2042117	KWMTBOMO06191	2089710	0.021035
Bomo_Chr11	2157059	2157750	KWMTBOMO06195	2169130	0.021127
Bomo_Chr11	2157059	2157750	KWMTBOMO06196	2169581	0.021126
Bomo_Chr11	2202033	2202953	KWMTBOMO06197	2208331	0.020856
Bomo_Chr11	2203602	2204576	KWMTBOMO06197	2208331	0.027344
Bomo_Chr11	2203602	2204576	KWMTBOMO06198	2217710	0.026204
Bomo_Chr11	2366082	2367096	KWMTBOMO06204	2361770	0.083821
Bomo_Chr11	2366082	2367096	KWMTBOMO06205	2363401	0.08382
Bomo_Chr11	2366082	2367096	KWMTBOMO06206	2381481	0.053365
Bomo_Chr11	2366082	2367096	KWMTBOMO06207	2399000	0.033672
Bomo_Chr11	2366082	2367096	KWMTBOMO06208	2399601	0.033672
Bomo_Chr11	2366082	2367096	KWMTBOMO06209	2416321	0.021192
Bomo_Chr11	2367905	2368818	KWMTBOMO06204	2361770	0.027067
Bomo_Chr11	2367905	2368818	KWMTBOMO06205	2363401	0.027067
Bomo_Chr11	2372501	2373466	KWMTBOMO06204	2361770	0.022277
Bomo_Chr11	2372501	2373466	KWMTBOMO06205	2363401	0.022276
Bomo_Chr11	2372501	2373466	KWMTBOMO06206	2381481	0.024624
Bomo_Chr11	2376634	2378076	KWMTBOMO06204	2361770	0.030619
Bomo_Chr11	2376634	2378076	KWMTBOMO06205	2363401	0.030619
Bomo_Chr11	2376634	2378076	KWMTBOMO06206	2381481	0.033846
Bomo_Chr11	2417511	2418834	KWMTBOMO06209	2416321	0.024721
Bomo_Chr11	2474990	2476436	KWMTBOMO06210	2478432	0.020241
Bomo_Chr11	2481683	2483133	KWMTBOMO06210	2478432	0.034626
Bomo_Chr11	2481683	2483133	KWMTBOMO06211	2480983	0.037129
Bomo_Chr11	2481683	2483133	KWMTBOMO06212	2487853	0.037124
Bomo_Chr11	2491616	2493887	KWMTBOMO06211	2480983	0.045379
Bomo_Chr11	2491616	2493887	KWMTBOMO06212	2487853	0.045373
Bomo_Chr11	2491616	2493887	KWMTBOMO06213	2500422	0.046237
Bomo_Chr11	2491616	2493887	KWMTBOMO06214	2512042	0.033802
Bomo_Chr11	2491616	2493887	KWMTBOMO06215	2518373	0.033798
Bomo_Chr11	2528647	2530726	KWMTBOMO06214	2512042	0.02374
Bomo_Chr11	2528647	2530726	KWMTBOMO06215	2518373	0.023737
Bomo_Chr11	2528647	2530726	KWMTBOMO06216	2534733	0.022925
Bomo_Chr11	2592934	2594060	KWMTBOMO06217	2572043	0.02024
Bomo_Chr11	2743629	2744129	KWMTBOMO06221	2741582	0.029003
Bomo_Chr11	2743629	2744129	KWMTBOMO06222	2742963	0.029003
Bomo_Chr11	2844394	2844970	KWMTBOMO06225	2846893	0.057161
Bomo_Chr11	2844394	2844970	KWMTBOMO06226	2877752	0.026719
Bomo_Chr11	2845487	2846360	KWMTBOMO06225	2846893	0.029851
Bomo_Chr11	2927449	2928284	KWMTBOMO06227	2921042	0.034518
Bomo_Chr11	2980526	2981963	KWMTBOMO06228	2979244	0.028361
Bomo_Chr11	2980526	2981963	KWMTBOMO06229	2982595	0.058905
Bomo_Chr11	3099961	3100461	KWMTBOMO06237	3101965	0.021066
Bomo_Chr11	3195852	3197191	KWMTBOMO06242	3175045	0.027384
Bomo_Chr11	3195852	3197191	KWMTBOMO06243	3181954	0.0443
Bomo_Chr11	3195852	3197191	KWMTBOMO06244	3182175	0.0443
Bomo_Chr11	3210144	3212253	KWMTBOMO06243	3181954	0.020455
Bomo_Chr11	3210144	3212253	KWMTBOMO06244	3182175	0.020455
Bomo_Chr11	3210144	3212253	KWMTBOMO06245	3223084	0.083075
Bomo_Chr11	3210144	3212253	KWMTBOMO06246	3239235	0.037196
Bomo_Chr11	3227167	3228014	KWMTBOMO06245	3223084	0.026097
Bomo_Chr11	3227167	3228014	KWMTBOMO06246	3239235	0.025987
Bomo_Chr11	3228250	3230305	KWMTBOMO06245	3223084	0.045745
Bomo_Chr11	3228250	3230305	KWMTBOMO06246	3239235	0.045552
Bomo_Chr11	3231699	3232453	KWMTBOMO06245	3223084	0.02172
Bomo_Chr11	3231699	3232453	KWMTBOMO06246	3239235	0.022674
Bomo_Chr11	3232504	3233324	KWMTBOMO06245	3223084	0.024212
Bomo_Chr11	3232504	3233324	KWMTBOMO06246	3239235	0.025275
Bomo_Chr11	3347974	3348474	KWMTBOMO06250	3345094	0.02174
Bomo_Chr11	3347974	3348474	KWMTBOMO06251	3345995	0.02174
Bomo_Chr11	3347974	3348474	KWMTBOMO06253	3354075	0.020792
Bomo_Chr11	3377543	3378931	KWMTBOMO06254	3381155	0.032913
Bomo_Chr11	3377543	3378931	KWMTBOMO06255	3382416	0.032912
Bomo_Chr11	3477587	3478769	KWMTBOMO06262	3476436	0.03971
Bomo_Chr11	3536066	3537933	KWMTBOMO06265	3538636	0.020274
Bomo_Chr11	3539417	3540376	KWMTBOMO06265	3538636	0.03707
Bomo_Chr11	3587756	3589493	KWMTBOMO06269	3590615	0.024468
Bomo_Chr11	3704649	3705359	KWMTBOMO06276	3706245	0.024459
Bomo_Chr11	3707159	3707777	KWMTBOMO06276	3706245	0.028212
Bomo_Chr11	3714194	3715823	KWMTBOMO06276	3706245	0.028044
Bomo_Chr11	3714194	3715823	KWMTBOMO06277	3722336	0.027631
Bomo_Chr11	4128761	4130085	KWMTBOMO06291	4132261	0.024537
Bomo_Chr11	4251234	4252000	KWMTBOMO06297	4249241	0.021912
Bomo_Chr11	4251234	4252000	KWMTBOMO06298	4250542	0.023038
Bomo_Chr11	4251234	4252000	KWMTBOMO06299	4254802	0.023034
Bomo_Chr11	4252567	4253930	KWMTBOMO06297	4249241	0.036226
Bomo_Chr11	4252567	4253930	KWMTBOMO06298	4250542	0.038089
Bomo_Chr11	4252567	4253930	KWMTBOMO06299	4254802	0.038081
Bomo_Chr11	4327854	4329210	KWMTBOMO06300	4327011	0.023966
Bomo_Chr11	4327854	4329210	KWMTBOMO06301	4330292	0.023954
Bomo_Chr11	4395424	4395924	KWMTBOMO06303	4393242	0.027246
Bomo_Chr11	4395424	4395924	KWMTBOMO06304	4398192	0.027242
Bomo_Chr11	4405854	4407094	KWMTBOMO06303	4393242	0.041745
Bomo_Chr11	4405854	4407094	KWMTBOMO06304	4398192	0.041738
Bomo_Chr11	4405854	4407094	KWMTBOMO06305	4429451	0.025872
Bomo_Chr11	4407265	4407775	KWMTBOMO06303	4393242	0.034076
Bomo_Chr11	4407265	4407775	KWMTBOMO06304	4398192	0.03407
Bomo_Chr11	4407265	4407775	KWMTBOMO06305	4429451	0.021119
Bomo_Chr11	4425624	4426158	KWMTBOMO06305	4429451	0.024392
Bomo_Chr11	4435996	4436943	KWMTBOMO06306	4437702	0.033178
Bomo_Chr11	4457449	4458879	KWMTBOMO06306	4437702	0.024343
Bomo_Chr11	4476827	4477382	KWMTBOMO06315	4649802	0.027017
Bomo_Chr11	4510986	4512812	KWMTBOMO06303	4393242	0.026282
Bomo_Chr11	4510986	4512812	KWMTBOMO06304	4398192	0.026278
Bomo_Chr11	4510986	4512812	KWMTBOMO06307	4499561	0.058197
Bomo_Chr11	4510986	4512812	KWMTBOMO06308	4501272	0.094451
Bomo_Chr11	4510986	4512812	KWMTBOMO06497	9157290	0.087371
Bomo_Chr11	4512850	4513541	KWMTBOMO06307	4499561	0.037757
Bomo_Chr11	4512850	4513541	KWMTBOMO06308	4501272	0.061278
Bomo_Chr11	4512850	4513541	KWMTBOMO06497	9157290	0.056685
Bomo_Chr11	4514326	4515125	KWMTBOMO06308	4501272	0.028583
Bomo_Chr11	4514326	4515125	KWMTBOMO06497	9157290	0.026441
Bomo_Chr11	4556328	4557833	KWMTBOMO06310	4567792	0.024145
Bomo_Chr11	4876885	4877397	KWMTBOMO06327	4840872	0.022583
Bomo_Chr11	4876885	4877397	KWMTBOMO06328	4851572	0.028358
Bomo_Chr11	4876885	4877397	KWMTBOMO06329	4852193	0.028358
Bomo_Chr11	4876885	4877397	KWMTBOMO06330	4875872	0.042939
Bomo_Chr11	4876885	4877397	KWMTBOMO06331	4876063	0.042938
Bomo_Chr11	4876885	4877397	KWMTBOMO06332	4890072	0.026611
Bomo_Chr11	4876885	4877397	KWMTBOMO06333	4891203	0.026611
Bomo_Chr11	4877620	4878581	KWMTBOMO06330	4875872	0.020095
Bomo_Chr11	4877620	4878581	KWMTBOMO06331	4876063	0.020094
Bomo_Chr11	4940324	4941574	KWMTBOMO06335	4942573	0.027982
Bomo_Chr11	4958414	4959982	KWMTBOMO06335	4942573	0.038819
Bomo_Chr11	4963697	4964951	KWMTBOMO06334	4910553	0.02028
Bomo_Chr11	4963697	4964951	KWMTBOMO06335	4942573	0.032271
Bomo_Chr11	4963697	4964951	KWMTBOMO06336	4993492	0.031735
Bomo_Chr11	5090802	5091610	KWMTBOMO06344	5086386	0.020431
Bomo_Chr11	5090802	5091610	KWMTBOMO06345	5094936	0.021413
Bomo_Chr11	5090802	5091610	KWMTBOMO06346	5096237	0.021412
Bomo_Chr11	5642298	5643296	KWMTBOMO06359	5647278	0.033401
Bomo_Chr11	5642298	5643296	KWMTBOMO06360	5668847	0.020565
Bomo_Chr11	5772854	5773772	KWMTBOMO06362	5771870	0.02942
Bomo_Chr11	5772854	5773772	KWMTBOMO06363	5776780	0.029421
Bomo_Chr11	5772854	5773772	KWMTBOMO06364	5777011	0.029421
Bomo_Chr11	5772854	5773772	KWMTBOMO06365	5784621	0.029777
Bomo_Chr11	6318461	6320954	KWMTBOMO06350	5170217	0.03126
Bomo_Chr11	6318461	6320954	KWMTBOMO06368	5885951	0.023343
Bomo_Chr11	6318461	6320954	KWMTBOMO06383	6035841	0.028908
Bomo_Chr11	6318461	6320954	KWMTBOMO06384	6090951	0.083114
Bomo_Chr11	6318461	6320954	KWMTBOMO06385	6095641	0.08311
Bomo_Chr11	6318461	6320954	KWMTBOMO06386	6100361	0.050558
Bomo_Chr11	6318461	6320954	KWMTBOMO06394	6155450	0.030297
Bomo_Chr11	6318461	6320954	KWMTBOMO06397	6342531	0.147705
Bomo_Chr11	6318461	6320954	KWMTBOMO06399	6378130	0.105099
Bomo_Chr11	6318461	6320954	KWMTBOMO06400	6381101	0.131286
Bomo_Chr11	6318461	6320954	KWMTBOMO06401	6461301	0.049686
Bomo_Chr11	6318461	6320954	KWMTBOMO06402	6473080	0.042273
Bomo_Chr11	6318461	6320954	KWMTBOMO06403	6473631	0.042272
Bomo_Chr11	6318461	6320954	KWMTBOMO06404	6484960	0.036994
Bomo_Chr11	6318461	6320954	KWMTBOMO06405	6495950	0.035267
Bomo_Chr11	6318461	6320954	KWMTBOMO06406	6497151	0.035267
Bomo_Chr11	6318461	6320954	KWMTBOMO06407	6516170	0.030116
Bomo_Chr11	6318461	6320954	KWMTBOMO06408	6520521	0.040144
Bomo_Chr11	6318461	6320954	KWMTBOMO06410	6573300	0.036258
Bomo_Chr11	6318461	6320954	KWMTBOMO06411	6583641	0.055281
Bomo_Chr11	6318461	6320954	KWMTBOMO06413	6751210	0.03627
Bomo_Chr11	6318461	6320954	KWMTBOMO06416	6805721	0.040175
Bomo_Chr11	6318461	6320954	KWMTBOMO06418	6829140	0.04279
Bomo_Chr11	6318461	6320954	KWMTBOMO06419	6829311	0.04279
Bomo_Chr11	6318461	6320954	KWMTBOMO06424	6884361	0.042303
Bomo_Chr11	6318461	6320954	KWMTBOMO06426	6929400	0.0281
Bomo_Chr11	6318461	6320954	KWMTBOMO06427	6932651	0.032499
Bomo_Chr11	6318461	6320954	KWMTBOMO06435	7093820	0.022475
Bomo_Chr11	6318461	6320954	KWMTBOMO06437	7099420	0.022478
Bomo_Chr11	6318461	6320954	KWMTBOMO06439	7115520	0.020186
Bomo_Chr11	6318461	6320954	KWMTBOMO06440	7138060	0.023908
Bomo_Chr11	6318461	6320954	KWMTBOMO06441	7142061	0.041773
Bomo_Chr11	6318461	6320954	KWMTBOMO06442	7150420	0.024968
Bomo_Chr11	6318461	6320954	KWMTBOMO06445	7199751	0.031036
Bomo_Chr11	6318461	6320954	KWMTBOMO06448	7318350	0.027962
Bomo_Chr11	6318461	6320954	KWMTBOMO06450	7357651	0.029675
Bomo_Chr11	6318461	6320954	KWMTBOMO06453	7432970	0.022837
Bomo_Chr11	6318461	6320954	KWMTBOMO06462	7806810	0.020753
Bomo_Chr11	6318461	6320954	KWMTBOMO06463	7807281	0.020751
Bomo_Chr11	6321144	6322751	KWMTBOMO06352	5202437	0.021122
Bomo_Chr11	6321144	6322751	KWMTBOMO06384	6090951	0.020734
Bomo_Chr11	6321144	6322751	KWMTBOMO06385	6095641	0.020733
Bomo_Chr11	6321144	6322751	KWMTBOMO06386	6100361	0.021524
Bomo_Chr11	6321144	6322751	KWMTBOMO06394	6155450	0.048106
Bomo_Chr11	6321144	6322751	KWMTBOMO06397	6342531	0.082951
Bomo_Chr11	6321144	6322751	KWMTBOMO06399	6378130	0.025259
Bomo_Chr11	6321144	6322751	KWMTBOMO06400	6381101	0.048462
Bomo_Chr11	6321144	6322751	KWMTBOMO06410	6573300	0.020705
Bomo_Chr11	6321144	6322751	KWMTBOMO06411	6583641	0.02358
Bomo_Chr11	6321144	6322751	KWMTBOMO06421	6869470	0.021681
Bomo_Chr11	6321144	6322751	KWMTBOMO06422	6869931	0.021681
Bomo_Chr11	6321144	6322751	KWMTBOMO06442	7150420	0.020614
Bomo_Chr11	6321144	6322751	KWMTBOMO06511	9592960	0.020471
Bomo_Chr11	6321144	6322751	KWMTBOMO06531	9876419	0.027033
Bomo_Chr11	6322952	6323452	KWMTBOMO06397	6342531	0.026359
Bomo_Chr11	6323586	6324764	KWMTBOMO06394	6155450	0.022993
Bomo_Chr11	6323586	6324764	KWMTBOMO06397	6342531	0.039647
Bomo_Chr11	6323586	6324764	KWMTBOMO06400	6381101	0.023163
Bomo_Chr11	6326051	6326729	KWMTBOMO06394	6155450	0.039364
Bomo_Chr11	6326051	6326729	KWMTBOMO06397	6342531	0.067876
Bomo_Chr11	6326051	6326729	KWMTBOMO06399	6378130	0.020669
Bomo_Chr11	6326051	6326729	KWMTBOMO06400	6381101	0.039655
Bomo_Chr11	6326051	6326729	KWMTBOMO06531	9876419	0.022122
Bomo_Chr11	6485804	6486749	KWMTBOMO06402	6473080	0.021817
Bomo_Chr11	6485804	6486749	KWMTBOMO06403	6473631	0.021816
Bomo_Chr11	6485804	6486749	KWMTBOMO06404	6484960	0.022007
Bomo_Chr11	6487047	6488646	KWMTBOMO06401	6461301	0.038483
Bomo_Chr11	6487047	6488646	KWMTBOMO06402	6473080	0.064442
Bomo_Chr11	6487047	6488646	KWMTBOMO06403	6473631	0.064441
Bomo_Chr11	6487047	6488646	KWMTBOMO06404	6484960	0.065003
Bomo_Chr11	6487047	6488646	KWMTBOMO06405	6495950	0.054836
Bomo_Chr11	6487047	6488646	KWMTBOMO06406	6497151	0.054837
Bomo_Chr11	6487047	6488646	KWMTBOMO06407	6516170	0.032897
Bomo_Chr11	6487047	6488646	KWMTBOMO06408	6520521	0.021522
Bomo_Chr11	6491494	6492006	KWMTBOMO06405	6495950	0.023833
Bomo_Chr11	6491494	6492006	KWMTBOMO06406	6497151	0.023834
Bomo_Chr11	6575617	6576424	KWMTBOMO06410	6573300	0.0235
Bomo_Chr11	6575617	6576424	KWMTBOMO06411	6583641	0.023069
Bomo_Chr11	6924681	6925201	KWMTBOMO06426	6929400	0.031476
Bomo_Chr11	6924681	6925201	KWMTBOMO06427	6932651	0.03148
Bomo_Chr11	6996927	6998078	KWMTBOMO06430	6983900	0.059797
Bomo_Chr11	6996927	6998078	KWMTBOMO06431	6984951	0.059801
Bomo_Chr11	7077445	7078898	KWMTBOMO06433	7076850	0.021985
Bomo_Chr11	7077445	7078898	KWMTBOMO06434	7079491	0.021985
Bomo_Chr11	7130039	7130933	KWMTBOMO06440	7138060	0.020739
Bomo_Chr11	7434568	7436137	KWMTBOMO06453	7432970	0.025116
Bomo_Chr11	7434568	7436137	KWMTBOMO06454	7441240	0.024833
Bomo_Chr11	7631909	7633043	KWMTBOMO06456	7627010	0.02994
Bomo_Chr11	7631909	7633043	KWMTBOMO06457	7628831	0.029942
Bomo_Chr11	7631909	7633043	KWMTBOMO06458	7646491	0.032994
Bomo_Chr11	7633494	7635103	KWMTBOMO06456	7627010	0.021518
Bomo_Chr11	7633494	7635103	KWMTBOMO06457	7628831	0.021519
Bomo_Chr11	7633494	7635103	KWMTBOMO06458	7646491	0.023714
Bomo_Chr11	7804997	7805611	KWMTBOMO06462	7806810	0.022463
Bomo_Chr11	7804997	7805611	KWMTBOMO06463	7807281	0.022463
Bomo_Chr11	8671824	8672693	KWMTBOMO06481	8650060	0.026979
Bomo_Chr11	8671824	8672693	KWMTBOMO06482	8664840	0.049061
Bomo_Chr11	8671824	8672693	KWMTBOMO06483	8671230	0.047307
Bomo_Chr11	8671824	8672693	KWMTBOMO06484	8673211	0.047311
Bomo_Chr11	8671824	8672693	KWMTBOMO06485	8677610	0.047314
Bomo_Chr11	8690325	8691443	KWMTBOMO06486	8697461	0.058828
Bomo_Chr11	8691987	8692581	KWMTBOMO06486	8697461	0.027965
Bomo_Chr11	8694994	8695494	KWMTBOMO06486	8697461	0.027811
Bomo_Chr11	8698665	8699165	KWMTBOMO06486	8697461	0.033869
Bomo_Chr11	8861052	8864418	KWMTBOMO06490	8885134	0.032444
Bomo_Chr11	8874357	8874857	KWMTBOMO06490	8885134	0.021009
Bomo_Chr11	8918853	8920632	KWMTBOMO06493	8929015	0.023878
Bomo_Chr11	8936763	8938855	KWMTBOMO06493	8929015	0.021731
Bomo_Chr11	8948029	8948616	KWMTBOMO06494	8952204	0.021138
Bomo_Chr11	9147852	9148607	KWMTBOMO06496	9138330	0.054093
Bomo_Chr11	9147852	9148607	KWMTBOMO06498	9177139	0.02266
Bomo_Chr11	9155659	9156159	KWMTBOMO06308	4501272	0.024228
Bomo_Chr11	9156262	9156762	KWMTBOMO06307	4499561	0.06388
Bomo_Chr11	9156262	9156762	KWMTBOMO06308	4501272	0.089778
Bomo_Chr11	9180483	9181948	KWMTBOMO06498	9177139	0.023848
Bomo_Chr11	9339297	9340458	KWMTBOMO06501	9322500	0.030958
Bomo_Chr11	9522132	9523512	KWMTBOMO06508	9519899	0.023792
Bomo_Chr11	9522132	9523512	KWMTBOMO06509	9533879	0.026867
Bomo_Chr11	9532790	9533290	KWMTBOMO06509	9533879	0.023027
Bomo_Chr11	9623664	9624846	KWMTBOMO06513	9615949	0.037566
Bomo_Chr11	9623664	9624846	KWMTBOMO06514	9626230	0.036336
Bomo_Chr11	9690515	9692058	KWMTBOMO06516	9680740	0.02085
Bomo_Chr11	9702085	9703334	KWMTBOMO06518	9719229	0.030309
Bomo_Chr11	9725334	9726919	KWMTBOMO06520	9733199	0.020071
Bomo_Chr11	9725334	9726919	KWMTBOMO06521	9736890	0.02007
Bomo_Chr11	9873300	9874100	KWMTBOMO06531	9876419	0.024254
Bomo_Chr11	10595961	10596855	KWMTBOMO06567	10580645	0.029404
Bomo_Chr11	10595961	10596855	KWMTBOMO06568	10591464	0.029622
Bomo_Chr11	10595961	10596855	KWMTBOMO06569	10591805	0.029623
Bomo_Chr11	10781172	10783165	KWMTBOMO06572	10765971	0.031082
Bomo_Chr11	10781172	10783165	KWMTBOMO06573	10808291	0.033166
Bomo_Chr11	10781172	10783165	KWMTBOMO06574	10819191	0.020285
Bomo_Chr11	10864101	10865296	KWMTBOMO06573	10808291	0.025718
Bomo_Chr11	10864101	10865296	KWMTBOMO06574	10819191	0.034105
Bomo_Chr11	10864101	10865296	KWMTBOMO06576	10830161	0.045269
Bomo_Chr11	10864101	10865296	KWMTBOMO06577	10830632	0.045271
Bomo_Chr11	10864101	10865296	KWMTBOMO06578	10848091	0.048828
Bomo_Chr11	10864101	10865296	KWMTBOMO06579	10949982	0.031111
Bomo_Chr11	10934173	10934673	KWMTBOMO06579	10949982	0.029783
Bomo_Chr11	11262802	11263866	KWMTBOMO06593	11257901	0.031053
Bomo_Chr11	11262802	11263866	KWMTBOMO06595	11269442	0.032663
Bomo_Chr11	11521838	11522785	KWMTBOMO06607	11533393	0.031175
Bomo_Chr11	11525593	11526502	KWMTBOMO06607	11533393	0.03046
Bomo_Chr11	11528931	11530623	KWMTBOMO06607	11533393	0.023441
Bomo_Chr11	11550748	11551719	KWMTBOMO06608	11552442	0.037742
Bomo_Chr11	11555856	11556862	KWMTBOMO06608	11552442	0.022474
Bomo_Chr11	11760150	11761424	KWMTBOMO06620	11769713	0.021162
Bomo_Chr11	11764938	11766340	KWMTBOMO06619	11750743	0.020084
Bomo_Chr11	11764938	11766340	KWMTBOMO06620	11769713	0.027306
Bomo_Chr11	11798241	11799552	KWMTBOMO06621	11792282	0.060243
Bomo_Chr11	11798241	11799552	KWMTBOMO06622	11807842	0.060113
Bomo_Chr11	11798241	11799552	KWMTBOMO06623	11810813	0.029318
Bomo_Chr11	11798241	11799552	KWMTBOMO06626	11847442	0.020538
Bomo_Chr11	11798241	11799552	KWMTBOMO06627	11848953	0.020537
Bomo_Chr11	11805828	11806828	KWMTBOMO06621	11792282	0.033307
Bomo_Chr11	11805828	11806828	KWMTBOMO06622	11807842	0.033235
Bomo_Chr11	11805828	11806828	KWMTBOMO06623	11810813	0.027758
Bomo_Chr11	11809603	11810103	KWMTBOMO06621	11792282	0.024498
Bomo_Chr11	11809603	11810103	KWMTBOMO06622	11807842	0.024445
Bomo_Chr11	11809603	11810103	KWMTBOMO06623	11810813	0.020416
Bomo_Chr11	11872652	11873613	KWMTBOMO06628	11861232	0.036581
Bomo_Chr11	11872652	11873613	KWMTBOMO06629	11877652	0.035066
Bomo_Chr11	11963225	11963985	KWMTBOMO06635	11956262	0.032858
Bomo_Chr11	11963225	11963985	KWMTBOMO06636	11966432	0.032298
Bomo_Chr11	11963225	11963985	KWMTBOMO06637	11973062	0.029111
Bomo_Chr11	11963225	11963985	KWMTBOMO06638	11979881	0.029109
Bomo_Chr11	11993065	11994430	KWMTBOMO06639	11990091	0.053713
Bomo_Chr11	11993065	11994430	KWMTBOMO06640	12004462	0.050432
Bomo_Chr11	11999076	11999758	KWMTBOMO06639	11990091	0.033125
Bomo_Chr11	11999076	11999758	KWMTBOMO06640	12004462	0.031101
Bomo_Chr11	12000899	12001399	KWMTBOMO06639	11990091	0.03978
Bomo_Chr11	12000899	12001399	KWMTBOMO06640	12004462	0.037349
Bomo_Chr11	12002123	12003961	KWMTBOMO06639	11990091	0.095887
Bomo_Chr11	12002123	12003961	KWMTBOMO06640	12004462	0.090028
Bomo_Chr11	12002123	12003961	KWMTBOMO06641	12016571	0.028864
Bomo_Chr11	12002123	12003961	KWMTBOMO06642	12018032	0.028864
Bomo_Chr11	12006031	12006531	KWMTBOMO06639	11990091	0.042194
Bomo_Chr11	12006031	12006531	KWMTBOMO06640	12004462	0.039616
Bomo_Chr11	12008472	12008972	KWMTBOMO06639	11990091	0.034149
Bomo_Chr11	12008472	12008972	KWMTBOMO06640	12004462	0.032062
Bomo_Chr11	12009390	12009890	KWMTBOMO06639	11990091	0.024232
Bomo_Chr11	12009390	12009890	KWMTBOMO06640	12004462	0.022751
Bomo_Chr11	12276793	12278215	KWMTBOMO06656	12260622	0.022615
Bomo_Chr11	12353193	12354077	KWMTBOMO06661	12350120	0.025211
Bomo_Chr11	12353193	12354077	KWMTBOMO06662	12351781	0.025211
Bomo_Chr11	12353193	12354077	KWMTBOMO06663	12360901	0.025494
Bomo_Chr11	12353193	12354077	KWMTBOMO06664	12367600	0.02549
Bomo_Chr11	12886082	12887932	KWMTBOMO06710	12882019	0.034961
Bomo_Chr11	12886082	12887932	KWMTBOMO06711	12883220	0.03496
Bomo_Chr11	12886082	12887932	KWMTBOMO06712	12890549	0.034977
Bomo_Chr11	12886082	12887932	KWMTBOMO06713	12892820	0.034977
Bomo_Chr11	12888088	12889025	KWMTBOMO06710	12882019	0.021122
Bomo_Chr11	12888088	12889025	KWMTBOMO06711	12883220	0.021121
Bomo_Chr11	12888088	12889025	KWMTBOMO06712	12890549	0.021131
Bomo_Chr11	12888088	12889025	KWMTBOMO06713	12892820	0.021132
Bomo_Chr11	12933861	12935091	KWMTBOMO06714	12944529	0.021244
Bomo_Chr11	12933861	12935091	KWMTBOMO06715	12946339	0.021244
Bomo_Chr11	12953911	12956051	KWMTBOMO06714	12944529	0.020585
Bomo_Chr11	12953911	12956051	KWMTBOMO06715	12946339	0.020585
Bomo_Chr11	13193055	13194281	KWMTBOMO06728	13184679	0.024508
Bomo_Chr11	13193055	13194281	KWMTBOMO06729	13185910	0.024507
Bomo_Chr11	14332952	14333910	KWMTBOMO06753	14321922	0.026149
Bomo_Chr11	14332952	14333910	KWMTBOMO06754	14327112	0.026149
Bomo_Chr11	14332952	14333910	KWMTBOMO06755	14337362	0.024595
Bomo_Chr11	14335164	14335960	KWMTBOMO06751	14313901	0.020583
Bomo_Chr11	14335164	14335960	KWMTBOMO06752	14314602	0.020583
Bomo_Chr11	14335164	14335960	KWMTBOMO06753	14321922	0.052019
Bomo_Chr11	14335164	14335960	KWMTBOMO06754	14327112	0.05202
Bomo_Chr11	14335164	14335960	KWMTBOMO06755	14337362	0.048927
Bomo_Chr11	14344198	14344977	KWMTBOMO06751	14313901	0.02194
Bomo_Chr11	14344198	14344977	KWMTBOMO06752	14314602	0.02194
Bomo_Chr11	14344198	14344977	KWMTBOMO06753	14321922	0.02707
Bomo_Chr11	14344198	14344977	KWMTBOMO06754	14327112	0.02707
Bomo_Chr11	14344198	14344977	KWMTBOMO06755	14337362	0.031786
Bomo_Chr11	14344198	14344977	KWMTBOMO06756	14357331	0.030631
Bomo_Chr11	14345255	14346206	KWMTBOMO06755	14337362	0.021427
Bomo_Chr11	14345255	14346206	KWMTBOMO06756	14357331	0.020648
Bomo_Chr11	14355152	14356148	KWMTBOMO06756	14357331	0.025167
Bomo_Chr11	14365634	14366714	KWMTBOMO06757	14361722	0.0207
Bomo_Chr11	14377597	14378097	KWMTBOMO06757	14361722	0.023109
Bomo_Chr11	14377597	14378097	KWMTBOMO06758	14378901	0.022119
Bomo_Chr11	14396797	14397297	KWMTBOMO06759	14381252	0.023319
Bomo_Chr11	14396797	14397297	KWMTBOMO06760	14393341	0.023334
Bomo_Chr11	14396797	14397297	KWMTBOMO06761	14395722	0.023334
Bomo_Chr11	14396797	14397297	KWMTBOMO06762	14398141	0.023333
Bomo_Chr11	14499616	14500622	KWMTBOMO06767	14503681	0.043046
Bomo_Chr11	14703020	14704094	KWMTBOMO06774	14708491	0.041245
Bomo_Chr11	14838874	14839645	KWMTBOMO06780	14831191	0.023038
Bomo_Chr11	14838874	14839645	KWMTBOMO06781	14837811	0.023041
Bomo_Chr11	14838874	14839645	KWMTBOMO06782	14840182	0.023472
Bomo_Chr11	14838874	14839645	KWMTBOMO06783	14849022	0.023475
Bomo_Chr11	14925474	14926757	KWMTBOMO06789	14928740	0.0201
Bomo_Chr11	15003593	15005442	KWMTBOMO06790	15019100	0.029161
Bomo_Chr11	15115061	15118153	KWMTBOMO06792	15119031	0.02903
Bomo_Chr11	15287417	15288291	KWMTBOMO06793	15294294	0.025103
Bomo_Chr11	15296559	15297612	KWMTBOMO06793	15294294	0.026217
Bomo_Chr11	15409863	15411090	KWMTBOMO06800	15408874	0.030862
Bomo_Chr11	15409863	15411090	KWMTBOMO06801	15411635	0.033325
Bomo_Chr11	15409863	15411090	KWMTBOMO06802	15426024	0.032677
Bomo_Chr11	15409863	15411090	KWMTBOMO06803	15426525	0.032678
Bomo_Chr11	15497419	15497919	KWMTBOMO06805	15498884	0.026327
Bomo_Chr11	15497419	15497919	KWMTBOMO06806	15505825	0.027081
Bomo_Chr11	15807691	15808280	KWMTBOMO06813	15853621	0.128353
Bomo_Chr11	15807691	15808280	KWMTBOMO06822	16062482	0.023117
Bomo_Chr11	15807691	15808280	KWMTBOMO06831	16464981	0.021058
Bomo_Chr11	16053469	16054820	KWMTBOMO06818	16033641	0.030892
Bomo_Chr11	16053469	16054820	KWMTBOMO06819	16034992	0.030895
Bomo_Chr11	16053469	16054820	KWMTBOMO06821	16051262	0.04891
Bomo_Chr11	16053469	16054820	KWMTBOMO06822	16062482	0.050165
Bomo_Chr11	16583482	16585814	KWMTBOMO06834	16578941	0.038667
Bomo_Chr11	16583482	16585814	KWMTBOMO06836	16605060	0.022599
Bomo_Chr11	16960821	16961377	KWMTBOMO06842	16917820	0.030927
Bomo_Chr11	16960821	16961377	KWMTBOMO06843	16963381	0.147864
Bomo_Chr11	16965142	16965642	KWMTBOMO06843	16963381	0.020154
Bomo_Chr11	16966323	16966823	KWMTBOMO06843	16963381	0.031506
Bomo_Chr11	16966836	16967336	KWMTBOMO06843	16963381	0.021612
Bomo_Chr11	16967577	16968182	KWMTBOMO06842	16917820	0.031016
Bomo_Chr11	16967577	16968182	KWMTBOMO06843	16963381	0.14829
Bomo_Chr11	17412905	17413405	KWMTBOMO06846	17422726	0.028372
Bomo_Chr11	17685460	17686281	KWMTBOMO06856	17677397	0.047012
Bomo_Chr11	17912622	17914593	KWMTBOMO06864	17909386	0.027602
Bomo_Chr11	17934925	17936522	KWMTBOMO06865	17932376	0.048763
Bomo_Chr11	17934925	17936522	KWMTBOMO06867	17957425	0.020452
Bomo_Chr11	17937119	17937619	KWMTBOMO06865	17932376	0.032046
Bomo_Chr11	17944015	17944523	KWMTBOMO06865	17932376	0.03134
Bomo_Chr11	17964578	17965961	KWMTBOMO06867	17957425	0.023689
Bomo_Chr11	18063909	18065922	KWMTBOMO06870	18056955	0.024686
Bomo_Chr11	18063909	18065922	KWMTBOMO06871	18057736	0.024687
Bomo_Chr11	18156254	18157720	KWMTBOMO06873	18155032	0.032843
Bomo_Chr11	18162389	18163678	KWMTBOMO06873	18155032	0.038549
Bomo_Chr11	18256618	18257514	KWMTBOMO06879	18220913	0.024278
Bomo_Chr11	18256618	18257514	KWMTBOMO06880	18253702	0.061103
Bomo_Chr11	18256618	18257514	KWMTBOMO06881	18254573	0.061104
Bomo_Chr11	18257893	18258639	KWMTBOMO06880	18253702	0.026043
Bomo_Chr11	18257893	18258639	KWMTBOMO06881	18254573	0.026043
Bomo_Chr11	18290708	18292214	KWMTBOMO06882	18293152	0.021893
Bomo_Chr11	18565968	18566468	KWMTBOMO06883	18562681	0.020478
Bomo_Chr11	18566872	18567910	KWMTBOMO06883	18562681	0.026275
Bomo_Chr11	18569790	18570713	KWMTBOMO06883	18562681	0.039332
Bomo_Chr11	18571498	18572422	KWMTBOMO06883	18562681	0.020406
Bomo_Chr11	18572492	18573326	KWMTBOMO06883	18562681	0.030905
Bomo_Chr11	18870910	18872164	KWMTBOMO06891	18872840	0.032892
Bomo_Chr11	18870910	18872164	KWMTBOMO06892	18877981	0.032897
Bomo_Chr11	18950742	18951534	KWMTBOMO06894	18921270	0.023775
Bomo_Chr11	18950742	18951534	KWMTBOMO06895	18922031	0.023776
Bomo_Chr11	18950742	18951534	KWMTBOMO06896	18929140	0.023786
Bomo_Chr11	18950742	18951534	KWMTBOMO06932	20432797	0.049441
Bomo_Chr11	19072215	19073400	KWMTBOMO06900	19067906	0.032432
Bomo_Chr11	19340050	19341244	KWMTBOMO06902	19357576	0.02179
Bomo_Chr11	19341387	19342730	KWMTBOMO06902	19357576	0.022294
Bomo_Chr11	19365922	19368572	KWMTBOMO06902	19357576	0.039932
Bomo_Chr11	19365922	19368572	KWMTBOMO06903	19389485	0.023778
Bomo_Chr11	19384646	19386850	KWMTBOMO06903	19389485	0.030722
Bomo_Chr11	19627338	19628324	KWMTBOMO06907	19629575	0.02899
Bomo_Chr11	19627338	19628324	KWMTBOMO06908	19629726	0.02899
Bomo_Chr11	19723899	19725540	KWMTBOMO06916	19692195	0.035095
Bomo_Chr11	19723899	19725540	KWMTBOMO06917	19704955	0.036243
Bomo_Chr11	19723899	19725540	KWMTBOMO06919	19721655	0.097541
Bomo_Chr11	19723899	19725540	KWMTBOMO06920	19748647	0.038468
Bomo_Chr11	19726224	19727083	KWMTBOMO06919	19721655	0.037023
Bomo_Chr11	19760228	19761101	KWMTBOMO06921	19757158	0.021023
Bomo_Chr11	19874848	19878515	KWMTBOMO06922	19800847	0.031786
Bomo_Chr11	20087390	20087911	KWMTBOMO06924	20085328	0.047807
Bomo_Chr11	20098203	20099826	KWMTBOMO06924	20085328	0.022297
Bomo_Chr11	20193880	20194783	KWMTBOMO06925	20198368	0.023343
Bomo_Chr11	20251954	20254113	KWMTBOMO06926	20265417	0.022085
Bomo_Chr11	20251954	20254113	KWMTBOMO06927	20266868	0.022087
Bomo_Chr11	20422149	20423973	KWMTBOMO06894	18921270	0.024786
Bomo_Chr11	20422149	20423973	KWMTBOMO06895	18922031	0.024787
Bomo_Chr11	20422149	20423973	KWMTBOMO06896	18929140	0.024801
Bomo_Chr11	20422149	20423973	KWMTBOMO06932	20432797	0.070009
Bomo_Chr12	53019	54485	KWMTBOMO06936	66275	0.035607
Bomo_Chr12	53019	54485	KWMTBOMO06937	67056	0.035605
Bomo_Chr12	53019	54485	KWMTBOMO06938	77835	0.020458
Bomo_Chr12	56256	57839	KWMTBOMO06936	66275	0.034379
Bomo_Chr12	56256	57839	KWMTBOMO06937	67056	0.034377
Bomo_Chr12	75133	76377	KWMTBOMO06936	66275	0.031791
Bomo_Chr12	75133	76377	KWMTBOMO06937	67056	0.031789
Bomo_Chr12	75133	76377	KWMTBOMO06938	77835	0.032895
Bomo_Chr12	163765	165583	KWMTBOMO06944	174995	0.024919
Bomo_Chr12	165872	167400	KWMTBOMO06944	174995	0.021963
Bomo_Chr12	243953	245519	KWMTBOMO06950	220226	0.028496
Bomo_Chr12	243953	245519	KWMTBOMO06951	232585	0.051526
Bomo_Chr12	243953	245519	KWMTBOMO06953	267536	0.02918
Bomo_Chr12	300269	301112	KWMTBOMO06955	291195	0.028219
Bomo_Chr12	300269	301112	KWMTBOMO06956	292436	0.028216
Bomo_Chr12	300269	301112	KWMTBOMO06957	297395	0.028206
Bomo_Chr12	300269	301112	KWMTBOMO06958	310695	0.032966
Bomo_Chr12	655170	657019	KWMTBOMO06964	669675	0.037634
Bomo_Chr12	982195	983455	KWMTBOMO06978	972762	0.035787
Bomo_Chr12	1892424	1894066	KWMTBOMO07016	1899553	0.024636
Bomo_Chr12	1892424	1894066	KWMTBOMO07017	1906623	0.023251
Bomo_Chr12	1980928	1981509	KWMTBOMO07020	1982199	0.031511
Bomo_Chr12	1980928	1981509	KWMTBOMO07021	1984200	0.031509
Bomo_Chr12	1980928	1981509	KWMTBOMO07022	1996179	0.034556
Bomo_Chr12	1980928	1981509	KWMTBOMO07025	2009189	0.030688
Bomo_Chr12	1990115	1991011	KWMTBOMO07020	1982199	0.020951
Bomo_Chr12	1990115	1991011	KWMTBOMO07021	1984200	0.02095
Bomo_Chr12	1990115	1991011	KWMTBOMO07022	1996179	0.04534
Bomo_Chr12	1990115	1991011	KWMTBOMO07025	2009189	0.021863
Bomo_Chr12	1991036	1991767	KWMTBOMO07022	1996179	0.038795
Bomo_Chr12	1998155	1999091	KWMTBOMO07022	1996179	0.023829
Bomo_Chr12	2011510	2012010	KWMTBOMO07025	2009189	0.021436
Bomo_Chr12	2011510	2012010	KWMTBOMO07026	2010740	0.022522
Bomo_Chr12	2050014	2050805	KWMTBOMO07028	2048310	0.02266
Bomo_Chr12	2119084	2119584	KWMTBOMO07030	2117160	0.028606
Bomo_Chr12	2214238	2215763	KWMTBOMO07010	1774453	0.020298
Bomo_Chr12	2214238	2215763	KWMTBOMO07014	1853714	0.022051
Bomo_Chr12	2214238	2215763	KWMTBOMO07035	2275949	0.020266
Bomo_Chr12	2214238	2215763	KWMTBOMO07041	2347979	0.024907
Bomo_Chr12	2328379	2329325	KWMTBOMO07039	2325699	0.025594
Bomo_Chr12	2328379	2329325	KWMTBOMO07040	2326100	0.025595
Bomo_Chr12	2329611	2330889	KWMTBOMO07039	2325699	0.035466
Bomo_Chr12	2329611	2330889	KWMTBOMO07040	2326100	0.035466
Bomo_Chr12	2329611	2330889	KWMTBOMO07041	2347979	0.02629
Bomo_Chr12	2361511	2362833	KWMTBOMO07039	2325699	0.02446
Bomo_Chr12	2361511	2362833	KWMTBOMO07040	2326100	0.024461
Bomo_Chr12	2361511	2362833	KWMTBOMO07042	2369439	0.037976
Bomo_Chr12	2361511	2362833	KWMTBOMO07043	2371249	0.038977
Bomo_Chr12	2724413	2725257	KWMTBOMO07047	2729234	0.027304
Bomo_Chr12	2724413	2725257	KWMTBOMO07048	2729795	0.027304
Bomo_Chr12	2742283	2743153	KWMTBOMO07049	2744874	0.022959
Bomo_Chr12	2824834	2825917	KWMTBOMO07055	2822995	0.028072
Bomo_Chr12	2829969	2830870	KWMTBOMO07055	2822995	0.024498
Bomo_Chr12	2870798	2872083	KWMTBOMO07049	2744874	0.02831
Bomo_Chr12	2870798	2872083	KWMTBOMO07055	2822995	0.033958
Bomo_Chr12	2870798	2872083	KWMTBOMO07056	2909385	0.040296
Bomo_Chr12	2870798	2872083	KWMTBOMO07057	2931405	0.026811
Bomo_Chr12	2870798	2872083	KWMTBOMO07058	2938644	0.026808
Bomo_Chr12	2870798	2872083	KWMTBOMO07059	2942555	0.028891
Bomo_Chr12	2870798	2872083	KWMTBOMO07064	2986795	0.026301
Bomo_Chr12	2870798	2872083	KWMTBOMO07065	3013914	0.023015
Bomo_Chr12	2895338	2896472	KWMTBOMO07056	2909385	0.020392
Bomo_Chr12	2903263	2904506	KWMTBOMO07056	2909385	0.040257
Bomo_Chr12	2906392	2906958	KWMTBOMO07056	2909385	0.061082
Bomo_Chr12	2916245	2916745	KWMTBOMO07056	2909385	0.022011
Bomo_Chr12	2921080	2922348	KWMTBOMO07056	2909385	0.020722
Bomo_Chr12	2921080	2922348	KWMTBOMO07057	2931405	0.029781
Bomo_Chr12	2921080	2922348	KWMTBOMO07058	2938644	0.029777
Bomo_Chr12	2922506	2923918	KWMTBOMO07056	2909385	0.043272
Bomo_Chr12	2922506	2923918	KWMTBOMO07057	2931405	0.062191
Bomo_Chr12	2922506	2923918	KWMTBOMO07058	2938644	0.062183
Bomo_Chr12	2922506	2923918	KWMTBOMO07059	2942555	0.037508
Bomo_Chr12	2922506	2923918	KWMTBOMO07063	2971574	0.025566
Bomo_Chr12	2922506	2923918	KWMTBOMO07064	2986795	0.028725
Bomo_Chr12	2982988	2984281	KWMTBOMO07063	2971574	0.024318
Bomo_Chr12	2982988	2984281	KWMTBOMO07064	2986795	0.024128
Bomo_Chr12	3046162	3047633	KWMTBOMO07066	3023714	0.023728
Bomo_Chr12	3089453	3091047	KWMTBOMO07067	3094447	0.020016
Bomo_Chr12	3117209	3118545	KWMTBOMO07067	3094447	0.040336
Bomo_Chr12	3117209	3118545	KWMTBOMO07070	3115427	0.055315
Bomo_Chr12	3117209	3118545	KWMTBOMO07071	3120428	0.052694
Bomo_Chr12	3117209	3118545	KWMTBOMO07072	3132977	0.037933
Bomo_Chr12	3117209	3118545	KWMTBOMO07076	3178007	0.021217
Bomo_Chr12	3117209	3118545	KWMTBOMO07077	3178508	0.021217
Bomo_Chr12	3118595	3119095	KWMTBOMO07070	3115427	0.027085
Bomo_Chr12	3118595	3119095	KWMTBOMO07071	3120428	0.025801
Bomo_Chr12	3188467	3189301	KWMTBOMO07076	3178007	0.022652
Bomo_Chr12	3188467	3189301	KWMTBOMO07077	3178508	0.022653
Bomo_Chr12	3188467	3189301	KWMTBOMO07078	3183128	0.02359
Bomo_Chr12	3189439	3190204	KWMTBOMO07076	3178007	0.023569
Bomo_Chr12	3189439	3190204	KWMTBOMO07077	3178508	0.023569
Bomo_Chr12	3189439	3190204	KWMTBOMO07078	3183128	0.024545
Bomo_Chr12	3191886	3192646	KWMTBOMO07079	3208637	0.026491
Bomo_Chr12	3212574	3214809	KWMTBOMO07079	3208637	0.025103
Bomo_Chr12	3212574	3214809	KWMTBOMO07080	3220687	0.039194
Bomo_Chr12	3342943	3343525	KWMTBOMO07086	3330258	0.027891
Bomo_Chr12	3805920	3807754	KWMTBOMO07089	3800888	0.02242
Bomo_Chr12	4047487	4048756	KWMTBOMO07093	4051424	0.02356
Bomo_Chr12	4120481	4121247	KWMTBOMO07095	4122063	0.029822
Bomo_Chr12	4788120	4788620	KWMTBOMO07110	4786861	0.071946
Bomo_Chr12	4788120	4788620	KWMTBOMO07111	4786962	0.071946
Bomo_Chr12	4788778	4791090	KWMTBOMO07107	4736211	0.026186
Bomo_Chr12	4788778	4791090	KWMTBOMO07108	4738742	0.026185
Bomo_Chr12	4788778	4791090	KWMTBOMO07110	4786861	0.122337
Bomo_Chr12	4788778	4791090	KWMTBOMO07111	4786962	0.122337
Bomo_Chr12	4788778	4791090	KWMTBOMO07114	4853351	0.026275
Bomo_Chr12	4791353	4792647	KWMTBOMO07110	4786861	0.054088
Bomo_Chr12	4791353	4792647	KWMTBOMO07111	4786962	0.054088
Bomo_Chr12	4845276	4846143	KWMTBOMO07114	4853351	0.026004
Bomo_Chr12	5608989	5609918	KWMTBOMO07126	5613972	0.021639
Bomo_Chr12	5611122	5612759	KWMTBOMO07126	5613972	0.024677
Bomo_Chr12	6008712	6010718	KWMTBOMO07135	6012511	0.074502
Bomo_Chr12	6011039	6011904	KWMTBOMO07135	6012511	0.120299
Bomo_Chr12	6286396	6286896	KWMTBOMO07140	6282366	0.068023
Bomo_Chr12	6286396	6286896	KWMTBOMO07141	6288477	0.06802
Bomo_Chr12	6286396	6286896	KWMTBOMO07142	6303716	0.040356
Bomo_Chr12	6286396	6286896	KWMTBOMO07146	6348976	0.021011
Bomo_Chr12	6353247	6355808	KWMTBOMO07146	6348976	0.028231
Bomo_Chr12	6689155	6690594	KWMTBOMO07155	6687187	0.042091
Bomo_Chr12	6690845	6692179	KWMTBOMO07155	6687187	0.020103
Bomo_Chr12	6694371	6695299	KWMTBOMO07155	6687187	0.020996
Bomo_Chr12	6695998	6697200	KWMTBOMO07155	6687187	0.024938
Bomo_Chr12	6782257	6783067	KWMTBOMO07159	6785888	0.021849
Bomo_Chr12	6784136	6784636	KWMTBOMO07159	6785888	0.020582
Bomo_Chr12	6810835	6811335	KWMTBOMO07160	6817828	0.027143
Bomo_Chr12	6813943	6815258	KWMTBOMO07160	6817828	0.049416
Bomo_Chr12	7041224	7041902	KWMTBOMO07170	7056608	0.020119
Bomo_Chr12	7045287	7046793	KWMTBOMO07170	7056608	0.020054
Bomo_Chr12	7058228	7059453	KWMTBOMO07170	7056608	0.027495
Bomo_Chr12	7058228	7059453	KWMTBOMO07171	7060359	0.023843
Bomo_Chr12	7090462	7091161	KWMTBOMO07173	7085278	0.021481
Bomo_Chr12	7551523	7552599	KWMTBOMO07188	7560686	0.033671
Bomo_Chr12	7551523	7552599	KWMTBOMO07189	7567467	0.033657
Bomo_Chr12	7735456	7736243	KWMTBOMO07196	7737476	0.022142
Bomo_Chr12	7749353	7749853	KWMTBOMO07196	7737476	0.037245
Bomo_Chr12	7749917	7750777	KWMTBOMO07196	7737476	0.02024
Bomo_Chr12	7749917	7750777	KWMTBOMO07198	7770287	0.021261
Bomo_Chr12	7750911	7751747	KWMTBOMO07196	7737476	0.02102
Bomo_Chr12	7750911	7751747	KWMTBOMO07198	7770287	0.02208
Bomo_Chr12	7752022	7752631	KWMTBOMO07194	7670066	0.021111
Bomo_Chr12	7752022	7752631	KWMTBOMO07195	7672067	0.021111
Bomo_Chr12	7752022	7752631	KWMTBOMO07196	7737476	0.050989
Bomo_Chr12	7752022	7752631	KWMTBOMO07198	7770287	0.053561
Bomo_Chr12	7752022	7752631	KWMTBOMO07199	7787426	0.033189
Bomo_Chr12	7752022	7752631	KWMTBOMO07200	7788437	0.033183
Bomo_Chr12	7752022	7752631	KWMTBOMO07201	7818116	0.028603
Bomo_Chr12	7752022	7752631	KWMTBOMO07203	7826727	0.022682
Bomo_Chr12	7752022	7752631	KWMTBOMO07205	7857276	0.023392
Bomo_Chr12	7752022	7752631	KWMTBOMO07206	7859647	0.02339
Bomo_Chr12	7752691	7753483	KWMTBOMO07196	7737476	0.037333
Bomo_Chr12	7752691	7753483	KWMTBOMO07198	7770287	0.039216
Bomo_Chr12	7752691	7753483	KWMTBOMO07199	7787426	0.0243
Bomo_Chr12	7752691	7753483	KWMTBOMO07200	7788437	0.024296
Bomo_Chr12	7752691	7753483	KWMTBOMO07201	7818116	0.020942
Bomo_Chr12	8368489	8369600	KWMTBOMO07212	8359535	0.026606
Bomo_Chr12	8368489	8369600	KWMTBOMO07213	8361645	0.027375
Bomo_Chr12	8368489	8369600	KWMTBOMO07214	8366816	0.02737
Bomo_Chr12	8416762	8417273	KWMTBOMO07216	8407845	0.021739
Bomo_Chr12	8416762	8417273	KWMTBOMO07217	8414565	0.030689
Bomo_Chr12	8419433	8420423	KWMTBOMO07216	8407845	0.047982
Bomo_Chr12	8419433	8420423	KWMTBOMO07217	8414565	0.067735
Bomo_Chr12	8419433	8420423	KWMTBOMO07218	8435906	0.033786
Bomo_Chr12	8420473	8420973	KWMTBOMO07217	8414565	0.020872
Bomo_Chr12	8420473	8420973	KWMTBOMO07218	8435906	0.02119
Bomo_Chr12	8426776	8427639	KWMTBOMO07217	8414565	0.022058
Bomo_Chr12	8426776	8427639	KWMTBOMO07218	8435906	0.022395
Bomo_Chr12	8429452	8430455	KWMTBOMO07217	8414565	0.023085
Bomo_Chr12	8429452	8430455	KWMTBOMO07218	8435906	0.023438
Bomo_Chr12	8431750	8432489	KWMTBOMO07218	8435906	0.020488
Bomo_Chr12	8436515	8437015	KWMTBOMO07218	8435906	0.025142
Bomo_Chr12	8440182	8441035	KWMTBOMO07218	8435906	0.027588
Bomo_Chr12	8509891	8510391	KWMTBOMO07220	8510955	0.029617
Bomo_Chr12	8509891	8510391	KWMTBOMO07221	8513336	0.029615
Bomo_Chr12	8681705	8682515	KWMTBOMO07231	8678855	0.028589
Bomo_Chr12	8681705	8682515	KWMTBOMO07232	8702100	0.021563
Bomo_Chr12	8691616	8693112	KWMTBOMO07232	8702100	0.023405
Bomo_Chr12	8799050	8799560	KWMTBOMO07235	8790449	0.023031
Bomo_Chr12	8799050	8799560	KWMTBOMO07236	8798280	0.023026
Bomo_Chr12	8799838	8800668	KWMTBOMO07235	8790449	0.056167
Bomo_Chr12	8799838	8800668	KWMTBOMO07236	8798280	0.056153
Bomo_Chr12	8898653	8899803	KWMTBOMO07238	8908790	0.025418
Bomo_Chr12	8905880	8907259	KWMTBOMO07238	8908790	0.026077
Bomo_Chr12	8922025	8922931	KWMTBOMO07240	8927499	0.036176
Bomo_Chr12	8945712	8946850	KWMTBOMO07241	8944939	0.031733
Bomo_Chr12	8949657	8950322	KWMTBOMO07240	8927499	0.021526
Bomo_Chr12	8949657	8950322	KWMTBOMO07241	8944939	0.039734
Bomo_Chr12	8950365	8950865	KWMTBOMO07241	8944939	0.02298
Bomo_Chr12	8950365	8950865	KWMTBOMO07242	8960379	0.02081
Bomo_Chr12	8950365	8950865	KWMTBOMO07243	8964710	0.020809
Bomo_Chr12	8966242	8967254	KWMTBOMO07242	8960379	0.033376
Bomo_Chr12	8966242	8967254	KWMTBOMO07243	8964710	0.033374
Bomo_Chr12	9002632	9003132	KWMTBOMO07245	9000959	0.029891
Bomo_Chr12	9003174	9004125	KWMTBOMO07244	8981850	0.020221
Bomo_Chr12	9003174	9004125	KWMTBOMO07245	9000959	0.043947
Bomo_Chr12	9011626	9012764	KWMTBOMO07245	9000959	0.047832
Bomo_Chr12	9011626	9012764	KWMTBOMO07246	9024940	0.034286
Bomo_Chr12	9011626	9012764	KWMTBOMO07247	9026991	0.034282
Bomo_Chr12	9086069	9086923	KWMTBOMO07248	9085500	0.022523
Bomo_Chr12	9090802	9091704	KWMTBOMO07248	9085500	0.026978
Bomo_Chr12	9095517	9096041	KWMTBOMO07248	9085500	0.026037
Bomo_Chr12	9098782	9100418	KWMTBOMO07248	9085500	0.055402
Bomo_Chr12	9098782	9100418	KWMTBOMO07249	9106370	0.039704
Bomo_Chr12	9098782	9100418	KWMTBOMO07250	9118880	0.026172
Bomo_Chr12	9102275	9103283	KWMTBOMO07248	9085500	0.026835
Bomo_Chr12	9102275	9103283	KWMTBOMO07249	9106370	0.038413
Bomo_Chr12	9102275	9103283	KWMTBOMO07250	9118880	0.038938
Bomo_Chr12	9104215	9104715	KWMTBOMO07249	9106370	0.021892
Bomo_Chr12	9104215	9104715	KWMTBOMO07250	9118880	0.022191
Bomo_Chr12	9119895	9120729	KWMTBOMO07250	9118880	0.02318
Bomo_Chr12	9119895	9120729	KWMTBOMO07251	9134920	0.024891
Bomo_Chr12	9133189	9133968	KWMTBOMO07249	9106370	0.02486
Bomo_Chr12	9133189	9133968	KWMTBOMO07250	9118880	0.034658
Bomo_Chr12	9133189	9133968	KWMTBOMO07251	9134920	0.057894
Bomo_Chr12	9133189	9133968	KWMTBOMO07252	9149040	0.058841
Bomo_Chr12	9133189	9133968	KWMTBOMO07253	9151531	0.043894
Bomo_Chr12	9133189	9133968	KWMTBOMO07254	9152701	0.043893
Bomo_Chr12	9182166	9183094	KWMTBOMO07255	9181590	0.027276
Bomo_Chr12	9182166	9183094	KWMTBOMO07257	9190790	0.027217
Bomo_Chr12	9182166	9183094	KWMTBOMO07258	9198420	0.027207
Bomo_Chr12	9491289	9491789	KWMTBOMO07263	9490452	0.020225
Bomo_Chr12	9503418	9504243	KWMTBOMO07264	9502891	0.02246
Bomo_Chr12	9503418	9504243	KWMTBOMO07265	9506492	0.022459
Bomo_Chr12	9844902	9845418	KWMTBOMO07274	9843868	0.023364
Bomo_Chr12	9913995	9914495	KWMTBOMO07278	9918837	0.020063
Bomo_Chr12	9955090	9956096	KWMTBOMO07280	9950977	0.022705
Bomo_Chr12	9955090	9956096	KWMTBOMO07281	9956648	0.022706
Bomo_Chr12	9965942	9968404	KWMTBOMO07280	9950977	0.025888
Bomo_Chr12	9965942	9968404	KWMTBOMO07281	9956648	0.025889
Bomo_Chr12	9965942	9968404	KWMTBOMO07282	9976837	0.022429
Bomo_Chr12	9991418	9992608	KWMTBOMO07283	9990247	0.026422
Bomo_Chr12	9991418	9992608	KWMTBOMO07284	9995567	0.026429
Bomo_Chr12	9991418	9992608	KWMTBOMO07285	9995798	0.026429
Bomo_Chr12	10130931	10131431	KWMTBOMO07298	10143518	0.023374
Bomo_Chr12	10130931	10131431	KWMTBOMO07299	10146627	0.023375
Bomo_Chr12	10606624	10607916	KWMTBOMO07317	10578581	0.024827
Bomo_Chr12	10606624	10607916	KWMTBOMO07318	10584341	0.049927
Bomo_Chr12	10606624	10607916	KWMTBOMO07321	10605041	0.069165
Bomo_Chr12	10606624	10607916	KWMTBOMO07322	10611562	0.047975
Bomo_Chr12	10606624	10607916	KWMTBOMO07323	10629842	0.025192
Bomo_Chr12	10606624	10607916	KWMTBOMO07324	10642021	0.021968
Bomo_Chr12	10609584	10610997	KWMTBOMO07318	10584341	0.020092
Bomo_Chr12	10609584	10610997	KWMTBOMO07321	10605041	0.041045
Bomo_Chr12	10609584	10610997	KWMTBOMO07322	10611562	0.055912
Bomo_Chr12	10609584	10610997	KWMTBOMO07323	10629842	0.057658
Bomo_Chr12	10609584	10610997	KWMTBOMO07324	10642021	0.032254
Bomo_Chr12	10642885	10644138	KWMTBOMO07324	10642021	0.028517
Bomo_Chr12	10672845	10675080	KWMTBOMO07325	10654401	0.032243
Bomo_Chr12	10672845	10675080	KWMTBOMO07326	10657602	0.032243
Bomo_Chr12	10672845	10675080	KWMTBOMO07327	10672141	0.038762
Bomo_Chr12	10672845	10675080	KWMTBOMO07328	10675912	0.038766
Bomo_Chr12	10672845	10675080	KWMTBOMO07329	10682341	0.03318
Bomo_Chr12	10672845	10675080	KWMTBOMO07330	10691582	0.022172
Bomo_Chr12	10672845	10675080	KWMTBOMO07331	10695932	0.022173
Bomo_Chr12	10721162	10722516	KWMTBOMO07333	10736567	0.044771
Bomo_Chr12	10721162	10722516	KWMTBOMO07334	10747877	0.022933
Bomo_Chr12	10721162	10722516	KWMTBOMO07335	10748758	0.022934
Bomo_Chr12	10738831	10740339	KWMTBOMO07333	10736567	0.020698
Bomo_Chr12	10738831	10740339	KWMTBOMO07334	10747877	0.021188
Bomo_Chr12	10738831	10740339	KWMTBOMO07335	10748758	0.021189
Bomo_Chr12	10753966	10754598	KWMTBOMO07334	10747877	0.023136
Bomo_Chr12	10753966	10754598	KWMTBOMO07335	10748758	0.023136
Bomo_Chr12	10753966	10754598	KWMTBOMO07337	10776267	0.024617
Bomo_Chr12	10827483	10828569	KWMTBOMO07339	10823007	0.02367
Bomo_Chr12	10827483	10828569	KWMTBOMO07340	10825948	0.02367
Bomo_Chr12	10930854	10932333	KWMTBOMO07350	10922527	0.02104
Bomo_Chr12	11087603	11088191	KWMTBOMO07355	11075368	0.028079
Bomo_Chr12	11109395	11110352	KWMTBOMO07358	11125757	0.023937
Bomo_Chr12	11121527	11122065	KWMTBOMO07357	11108007	0.033822
Bomo_Chr12	11129347	11130562	KWMTBOMO07357	11108007	0.03058
Bomo_Chr12	11157153	11157761	KWMTBOMO07359	11168438	0.022978
Bomo_Chr12	11194909	11196748	KWMTBOMO07360	11181648	0.023579
Bomo_Chr12	11288288	11288941	KWMTBOMO07364	11296540	0.020032
Bomo_Chr12	11414866	11415740	KWMTBOMO07369	11391099	0.022648
Bomo_Chr12	11414866	11415740	KWMTBOMO07370	11409329	0.036957
Bomo_Chr12	11523203	11524538	KWMTBOMO07374	11520349	0.031996
Bomo_Chr12	11523203	11524538	KWMTBOMO07375	11522600	0.031999
Bomo_Chr12	11523203	11524538	KWMTBOMO07376	11537489	0.030797
Bomo_Chr12	11523203	11524538	KWMTBOMO07377	11539180	0.030799
Bomo_Chr12	11570595	11572092	KWMTBOMO07379	11567049	0.024632
Bomo_Chr12	11570595	11572092	KWMTBOMO07380	11569360	0.024606
Bomo_Chr12	11570595	11572092	KWMTBOMO07381	11593939	0.021256
Bomo_Chr12	11579088	11580729	KWMTBOMO07374	11520349	0.023586
Bomo_Chr12	11579088	11580729	KWMTBOMO07375	11522600	0.023587
Bomo_Chr12	11579088	11580729	KWMTBOMO07376	11537489	0.03555
Bomo_Chr12	11579088	11580729	KWMTBOMO07377	11539180	0.035552
Bomo_Chr12	11579088	11580729	KWMTBOMO07378	11556519	0.04235
Bomo_Chr12	11579088	11580729	KWMTBOMO07379	11567049	0.053414
Bomo_Chr12	11579088	11580729	KWMTBOMO07380	11569360	0.053358
Bomo_Chr12	11579088	11580729	KWMTBOMO07381	11593939	0.046095
Bomo_Chr12	11883993	11885681	KWMTBOMO07387	11890115	0.024711
Bomo_Chr12	12059482	12060575	KWMTBOMO07400	12061314	0.020318
Bomo_Chr12	12080053	12080915	KWMTBOMO07401	12081724	0.023645
Bomo_Chr12	12080053	12080915	KWMTBOMO07402	12090675	0.02188
Bomo_Chr12	12091277	12091777	KWMTBOMO07401	12081724	0.030467
Bomo_Chr12	12091277	12091777	KWMTBOMO07402	12090675	0.030952
Bomo_Chr12	12091277	12091777	KWMTBOMO07403	12102944	0.032374
Bomo_Chr12	12091277	12091777	KWMTBOMO07404	12103045	0.032376
Bomo_Chr12	12091277	12091777	KWMTBOMO07405	12107794	0.032385
Bomo_Chr12	12091277	12091777	KWMTBOMO07406	12109455	0.032384
Bomo_Chr12	12091824	12092676	KWMTBOMO07401	12081724	0.038679
Bomo_Chr12	12091824	12092676	KWMTBOMO07402	12090675	0.039294
Bomo_Chr12	12091824	12092676	KWMTBOMO07403	12102944	0.0411
Bomo_Chr12	12091824	12092676	KWMTBOMO07404	12103045	0.041102
Bomo_Chr12	12091824	12092676	KWMTBOMO07405	12107794	0.041113
Bomo_Chr12	12091824	12092676	KWMTBOMO07406	12109455	0.041111
Bomo_Chr12	12443237	12443767	KWMTBOMO07413	12451650	0.025188
Bomo_Chr12	12443237	12443767	KWMTBOMO07414	12458039	0.025191
Bomo_Chr12	12449118	12450268	KWMTBOMO07413	12451650	0.037683
Bomo_Chr12	12449118	12450268	KWMTBOMO07414	12458039	0.037688
Bomo_Chr12	12494377	12495416	KWMTBOMO07417	12471480	0.025703
Bomo_Chr12	12494377	12495416	KWMTBOMO07418	12492640	0.027628
Bomo_Chr12	12494377	12495416	KWMTBOMO07419	12496079	0.027629
Bomo_Chr12	13038197	13039731	KWMTBOMO07431	13035992	0.040941
Bomo_Chr12	13039893	13040700	KWMTBOMO07431	13035992	0.020976
Bomo_Chr12	13422057	13422933	KWMTBOMO07439	13418592	0.020786
Bomo_Chr12	13422057	13422933	KWMTBOMO07440	13439052	0.028508
Bomo_Chr12	13423082	13423955	KWMTBOMO07439	13418592	0.02042
Bomo_Chr12	13423082	13423955	KWMTBOMO07440	13439052	0.028006
Bomo_Chr12	13439584	13440747	KWMTBOMO07440	13439052	0.020116
Bomo_Chr12	13439584	13440747	KWMTBOMO07441	13441913	0.021357
Bomo_Chr12	13464373	13465690	KWMTBOMO07442	13461872	0.025374
Bomo_Chr12	13464373	13465690	KWMTBOMO07443	13467553	0.025382
Bomo_Chr12	13472349	13473270	KWMTBOMO07444	13480103	0.039577
Bomo_Chr12	13598288	13598850	KWMTBOMO07445	13589452	0.022397
Bomo_Chr12	13681284	13682370	KWMTBOMO07448	13675703	0.031493
Bomo_Chr12	13681284	13682370	KWMTBOMO07449	13679522	0.031499
Bomo_Chr12	13739174	13740067	KWMTBOMO07451	13738301	0.047838
Bomo_Chr12	13740080	13741139	KWMTBOMO07451	13738301	0.020976
Bomo_Chr12	13772641	13773141	KWMTBOMO07453	13751322	0.021215
Bomo_Chr12	13772641	13773141	KWMTBOMO07454	13796212	0.021075
Bomo_Chr12	13774923	13776395	KWMTBOMO07453	13751322	0.027339
Bomo_Chr12	13774923	13776395	KWMTBOMO07454	13796212	0.027157
Bomo_Chr12	13777521	13779458	KWMTBOMO07453	13751322	0.036319
Bomo_Chr12	13777521	13779458	KWMTBOMO07454	13796212	0.036078
Bomo_Chr12	13802222	13803117	KWMTBOMO07454	13796212	0.024523
Bomo_Chr12	13863032	13864542	KWMTBOMO07467	13860552	0.040046
Bomo_Chr12	13863032	13864542	KWMTBOMO07468	13862062	0.040048
Bomo_Chr12	13863032	13864542	KWMTBOMO07470	13875632	0.037
Bomo_Chr12	14280345	14281038	KWMTBOMO07488	14275312	0.020113
Bomo_Chr12	14280345	14281038	KWMTBOMO07489	14277713	0.020114
Bomo_Chr12	14301237	14302837	KWMTBOMO07490	14305822	0.063591
Bomo_Chr12	14303133	14303633	KWMTBOMO07490	14305822	0.02189
Bomo_Chr12	14303979	14304570	KWMTBOMO07484	14181313	0.02375
Bomo_Chr12	14303979	14304570	KWMTBOMO07490	14305822	0.08367
Bomo_Chr12	14304743	14305243	KWMTBOMO07484	14181313	0.021917
Bomo_Chr12	14304743	14305243	KWMTBOMO07490	14305822	0.07721
Bomo_Chr12	14307375	14307901	KWMTBOMO07490	14305822	0.029846
Bomo_Chr12	15163187	15163717	KWMTBOMO07499	15166408	0.022419
Bomo_Chr12	15237043	15237876	KWMTBOMO07503	15215108	0.023045
Bomo_Chr12	15237043	15237876	KWMTBOMO07504	15218708	0.023045
Bomo_Chr12	15237043	15237876	KWMTBOMO07506	15236227	0.032518
Bomo_Chr12	15237043	15237876	KWMTBOMO07507	15239078	0.032516
Bomo_Chr12	15246929	15248735	KWMTBOMO07501	15195228	0.021083
Bomo_Chr12	15246929	15248735	KWMTBOMO07503	15215108	0.02479
Bomo_Chr12	15246929	15248735	KWMTBOMO07504	15218708	0.024789
Bomo_Chr12	15246929	15248735	KWMTBOMO07506	15236227	0.033303
Bomo_Chr12	15246929	15248735	KWMTBOMO07507	15239078	0.033301
Bomo_Chr12	15246929	15248735	KWMTBOMO07508	15252138	0.039717
Bomo_Chr12	15246929	15248735	KWMTBOMO07509	15261677	0.022402
Bomo_Chr12	15246929	15248735	KWMTBOMO07510	15266798	0.022404
Bomo_Chr12	15305594	15307011	KWMTBOMO07512	15292187	0.020865
Bomo_Chr12	15305594	15307011	KWMTBOMO07513	15293068	0.020864
Bomo_Chr12	15332992	15333952	KWMTBOMO07514	15320968	0.025523
Bomo_Chr12	15332992	15333952	KWMTBOMO07515	15331867	0.027383
Bomo_Chr12	15332992	15333952	KWMTBOMO07516	15337528	0.027381
Bomo_Chr12	16568159	16569031	KWMTBOMO07528	16439429	0.030883
Bomo_Chr12	16568159	16569031	KWMTBOMO07529	16448289	0.026046
Bomo_Chr12	16568159	16569031	KWMTBOMO07531	16524239	0.081384
Bomo_Chr12	16568159	16569031	KWMTBOMO07532	16526080	0.081389
Bomo_Chr12	16568159	16569031	KWMTBOMO07533	16693469	0.034927
Bomo_Chr12	16570522	16572405	KWMTBOMO07529	16448289	0.068148
Bomo_Chr12	16573389	16574574	KWMTBOMO07529	16448289	0.037959
Bomo_Chr12	16574664	16576988	KWMTBOMO07496	15027358	0.020439
Bomo_Chr12	16574664	16576988	KWMTBOMO07497	15037929	0.020432
Bomo_Chr12	16574664	16576988	KWMTBOMO07501	15195228	0.020366
Bomo_Chr12	16574664	16576988	KWMTBOMO07522	15431467	0.021225
Bomo_Chr12	16574664	16576988	KWMTBOMO07524	15658633	0.024713
Bomo_Chr12	16574664	16576988	KWMTBOMO07525	15725974	0.024203
Bomo_Chr12	16574664	16576988	KWMTBOMO07527	15936374	0.023237
Bomo_Chr12	16574664	16576988	KWMTBOMO07529	16448289	0.098507
Bomo_Chr12	16574664	16576988	KWMTBOMO07533	16693469	0.020324
Bomo_Chr12	16574664	16576988	KWMTBOMO07553	17348646	0.027305
Bomo_Chr12	16962969	16963469	KWMTBOMO07536	16977585	0.023643
Bomo_Chr12	16964092	16967198	KWMTBOMO07536	16977585	0.068777
Bomo_Chr12	16971256	16971756	KWMTBOMO07536	16977585	0.022049
Bomo_Chr12	16972598	16973559	KWMTBOMO07536	16977585	0.023375
Bomo_Chr12	16979098	16981350	KWMTBOMO07536	16977585	0.04902
Bomo_Chr12	17121798	17123317	KWMTBOMO07537	17115176	0.065137
Bomo_Chr12	17121798	17123317	KWMTBOMO07538	17118397	0.065142
Bomo_Chr12	17121798	17123317	KWMTBOMO07539	17147096	0.040231
Bomo_Chr12	17121798	17123317	KWMTBOMO07540	17158187	0.037647
Bomo_Chr12	17125327	17126559	KWMTBOMO07537	17115176	0.039032
Bomo_Chr12	17125327	17126559	KWMTBOMO07538	17118397	0.039035
Bomo_Chr12	17125327	17126559	KWMTBOMO07539	17147096	0.024107
Bomo_Chr12	17125327	17126559	KWMTBOMO07540	17158187	0.022559
Bomo_Chr12	17131728	17133627	KWMTBOMO07539	17147096	0.024952
Bomo_Chr12	17256940	17257440	KWMTBOMO07546	17241906	0.022088
Bomo_Chr12	17256940	17257440	KWMTBOMO07547	17247297	0.022093
Bomo_Chr12	17256940	17257440	KWMTBOMO07548	17256266	0.023225
Bomo_Chr12	17256940	17257440	KWMTBOMO07549	17256367	0.023225
Bomo_Chr12	17283048	17283725	KWMTBOMO07550	17276636	0.036959
Bomo_Chr12	17291692	17292281	KWMTBOMO07551	17305987	0.035518
Bomo_Chr12	17296809	17297771	KWMTBOMO07551	17305987	0.027624
Bomo_Chr12	17300585	17303228	KWMTBOMO07551	17305987	0.052224
Bomo_Chr12	17300585	17303228	KWMTBOMO07552	17314307	0.04822
Bomo_Chr12	17308365	17309141	KWMTBOMO07551	17305987	0.020488
Bomo_Chr12	17309345	17310391	KWMTBOMO07551	17305987	0.033094
Bomo_Chr12	17309345	17310391	KWMTBOMO07552	17314307	0.030556
Bomo_Chr12	17311035	17313071	KWMTBOMO07548	17256266	0.020234
Bomo_Chr12	17311035	17313071	KWMTBOMO07549	17256367	0.020234
Bomo_Chr12	17311035	17313071	KWMTBOMO07550	17276636	0.021584
Bomo_Chr12	17311035	17313071	KWMTBOMO07551	17305987	0.080573
Bomo_Chr12	17311035	17313071	KWMTBOMO07552	17314307	0.087277
Bomo_Chr12	17311035	17313071	KWMTBOMO07553	17348646	0.021801
Bomo_Chr12	17313195	17313695	KWMTBOMO07551	17305987	0.021891
Bomo_Chr12	17313195	17313695	KWMTBOMO07552	17314307	0.023712
[truncated: 9,872 more rows]
