# Supplementary material for: Genome-wide chromatin interaction profiling reveals a vital role of super-enhancers and rearrangements in host enhancer contacts during BmNPV infection
Source: HighWire-hosted journal article supplement (doi:10.1101/gr.277931.123), 2023-10-23
Supplement: Supplemental_Table_S6.xlsx [file Supplemental_Table_S6.xlsx]

## Sheet: merged_v2h_only_p0_interaction_
Supplemental Table S6. List of the significant interactions between the genome of BmNPV and the host.
chr1	mid1	chr2	mid2	CC	p	fdr	bin1_low	bin1_high	bin2_low	bin2_high	sumCC	StrongConn
Bomo_Chr1	1237500	BmNPV	82500	8	0.000161941	0.0122869	1235000	1240000	80000	85000	8	1
Bomo_Chr1	1822500	BmNPV	77500	9	2.6311e-05	0.00226373	1820000	1825000	75000	80000	9	1
Bomo_Chr1	3807500	BmNPV	42500	8	0.000161941	0.0122869	3805000	3810000	40000	45000	8	1
Bomo_Chr1	3837500	BmNPV	122500	11	5.16374e-07	5.44926e-05	3835000	3840000	120000	125000	11	1
Bomo_Chr1	4427500	BmNPV	92500	8	0.000161941	0.0122869	4425000	4430000	90000	95000	8	1
Bomo_Chr1	4547500	BmNPV	77500	8	0.000161941	0.0122869	4545000	4550000	75000	80000	8	1
Bomo_Chr1	5392500	BmNPV	2500	8	0.000161941	0.0122869	5390000	5395000	0	5000	8	1
Bomo_Chr1	5947500	BmNPV	122500	8	0.000161941	0.0122869	5945000	5950000	120000	125000	8	1
Bomo_Chr1	8542500	BmNPV	27500	9	2.6311e-05	0.00226373	8540000	8545000	25000	35000	17	1
Bomo_Chr1	8542500	BmNPV	42500	11	5.16374e-07	5.44926e-05	8540000	8545000	40000	45000	11	1
Bomo_Chr1	8542500	BmNPV	117500	10	3.86084e-06	0.000370259	8540000	8545000	115000	120000	10	1
Bomo_Chr1	8542500	BmNPV	127500	12	6.34341e-08	7.28518e-06	8540000	8545000	125000	130000	12	1
Bomo_Chr1	9042500	BmNPV	2500	14	7.60703e-10	1.01057e-07	9040000	9045000	0	15000	35	1
Bomo_Chr1	9042500	BmNPV	32500	19	3.89442e-15	6.7524e-13	9040000	9045000	25000	55000	80	1
Bomo_Chr1	9042500	BmNPV	62500	21	2.04303e-17	3.84409e-15	9040000	9045000	60000	130000	202	1
Bomo_Chr1	10882500	BmNPV	122500	12	6.34341e-08	7.28518e-06	10880000	10885000	120000	125000	12	1
Bomo_Chr1	12642500	BmNPV	62500	8	0.000161941	0.0122869	12640000	12645000	60000	65000	8	1
Bomo_Chr1	13032500	BmNPV	127500	8	0.000161941	0.0122869	13030000	13035000	125000	130000	8	1
Bomo_Chr1	13292500	BmNPV	72500	8	0.000161941	0.0122869	13290000	13295000	70000	75000	8	1
Bomo_Chr1	13337500	BmNPV	77500	12	6.34341e-08	7.28518e-06	13335000	13340000	75000	80000	12	1
Bomo_Chr1	14507500	BmNPV	42500	9	2.6311e-05	0.00226373	14505000	14510000	40000	45000	9	1
Bomo_Chr1	14512500	BmNPV	2500	8	0.000161941	0.0122869	14510000	14515000	0	5000	8	1
Bomo_Chr1	14632500	BmNPV	82500	8	0.000161941	0.0122869	14630000	14635000	80000	85000	8	1
Bomo_Chr1	14657500	BmNPV	107500	8	0.000161941	0.0122869	14655000	14660000	105000	110000	8	1
Bomo_Chr1	15022500	BmNPV	82500	10	3.86084e-06	0.000370259	15020000	15025000	80000	85000	10	1
Bomo_Chr1	15172500	BmNPV	82500	8	0.000161941	0.0122869	15170000	15175000	80000	85000	8	1
Bomo_Chr1	15302500	BmNPV	42500	9	2.6311e-05	0.00226373	15300000	15305000	40000	45000	9	1
Bomo_Chr1	15377500	BmNPV	82500	8	0.000161941	0.0122869	15375000	15380000	80000	85000	8	1
Bomo_Chr1	15437500	BmNPV	92500	8	0.000161941	0.0122869	15435000	15440000	90000	95000	8	1
Bomo_Chr1	15467500	BmNPV	92500	8	0.000161941	0.0122869	15465000	15470000	90000	95000	8	1
Bomo_Chr1	16022500	BmNPV	42500	12	6.34341e-08	7.28518e-06	16020000	16025000	40000	45000	12	1
Bomo_Chr1	16297500	BmNPV	2500	11	5.16374e-07	5.44926e-05	16295000	16300000	0	15000	28	1
Bomo_Chr1	16297500	BmNPV	22500	18	4.98782e-14	8.26753e-12	16295000	16300000	20000	35000	45	1
Bomo_Chr1	16297500	BmNPV	47500	11	5.16374e-07	5.44926e-05	16295000	16300000	40000	50000	21	1
Bomo_Chr1	16297500	BmNPV	62500	17	6.05488e-13	9.56178e-11	16295000	16300000	55000	65000	25	1
Bomo_Chr1	16297500	BmNPV	77500	16	6.94582e-12	1.04055e-09	16295000	16300000	70000	85000	35	1
Bomo_Chr1	16297500	BmNPV	102500	17	6.05488e-13	9.56178e-11	16295000	16300000	90000	115000	66	1
Bomo_Chr1	16297500	BmNPV	122500	16	6.94582e-12	1.04055e-09	16295000	16300000	120000	130000	24	1
Bomo_Chr1	16392500	BmNPV	42500	9	2.6311e-05	0.00226373	16390000	16395000	40000	45000	9	1
Bomo_Chr1	17617500	BmNPV	27500	8	0.000161941	0.0122869	17615000	17620000	25000	30000	8	1
Bomo_Chr1	18807500	BmNPV	97500	8	0.000161941	0.0122869	18805000	18810000	95000	100000	8	1
Bomo_Chr1	18897500	BmNPV	42500	8	0.000161941	0.0122869	18895000	18900000	40000	45000	8	1
Bomo_Chr1	18972500	BmNPV	32500	8	0.000161941	0.0122869	18970000	18975000	30000	35000	8	1
Bomo_Chr1	19262500	BmNPV	82500	9	2.6311e-05	0.00226373	19260000	19265000	80000	85000	9	1
Bomo_Chr1	19332500	BmNPV	7500	8	0.000161941	0.0122869	19330000	19335000	5000	10000	8	1
Bomo_Chr1	19432500	BmNPV	27500	8	0.000161941	0.0122869	19430000	19435000	25000	30000	8	1
Bomo_Chr1	19817500	BmNPV	92500	8	0.000161941	0.0122869	19815000	19820000	90000	95000	8	1
Bomo_Chr1	19832500	BmNPV	42500	8	0.000161941	0.0122869	19830000	19835000	40000	45000	8	1
Bomo_Chr1	19842500	BmNPV	27500	8	0.000161941	0.0122869	19840000	19845000	25000	30000	8	1
Bomo_Chr1	19852500	BmNPV	2500	9	2.6311e-05	0.00226373	19850000	19855000	0	5000	9	1
Bomo_Chr1	19852500	BmNPV	122500	9	2.6311e-05	0.00226373	19850000	19855000	120000	130000	18	1
Bomo_Chr1	19862500	BmNPV	82500	9	2.6311e-05	0.00226373	19860000	19865000	80000	85000	9	1
Bomo_Chr1	19907500	BmNPV	52500	10	3.86084e-06	0.000370259	19905000	19910000	50000	55000	10	1
Bomo_Chr1	20207500	BmNPV	77500	8	0.000161941	0.0122869	20205000	20210000	75000	80000	8	1
Bomo_Chr1	20207500	BmNPV	122500	8	0.000161941	0.0122869	20205000	20210000	120000	125000	8	1
Bomo_Chr1	20317500	BmNPV	87500	8	0.000161941	0.0122869	20315000	20320000	85000	90000	8	1
Bomo_Chr1	20317500	BmNPV	127500	8	0.000161941	0.0122869	20315000	20320000	125000	130000	8	1
Bomo_Chr1	20322500	BmNPV	62500	8	0.000161941	0.0122869	20320000	20325000	60000	65000	8	1
Bomo_Chr1	20482500	BmNPV	32500	9	2.6311e-05	0.00226373	20480000	20485000	30000	35000	9	1
Bomo_Chr10	607500	BmNPV	42500	44	3.62854e-48	1.20354e-45	605000	610000	0	130000	654	1
Bomo_Chr10	1082500	BmNPV	127500	11	5.16374e-07	5.44926e-05	1080000	1085000	125000	130000	11	1
Bomo_Chr10	1817500	BmNPV	62500	9	2.6311e-05	0.00226373	1815000	1820000	60000	65000	9	1
Bomo_Chr10	1817500	BmNPV	82500	11	5.16374e-07	5.44926e-05	1815000	1820000	75000	85000	19	1
Bomo_Chr10	1817500	BmNPV	92500	9	2.6311e-05	0.00226373	1815000	1820000	90000	100000	17	1
Bomo_Chr10	1817500	BmNPV	112500	10	3.86084e-06	0.000370259	1815000	1820000	110000	115000	10	1
Bomo_Chr10	1817500	BmNPV	127500	11	5.16374e-07	5.44926e-05	1815000	1820000	125000	130000	11	1
Bomo_Chr10	2027500	BmNPV	77500	39	6.47249e-41	1.97736e-38	2025000	2030000	0	130000	667	1
Bomo_Chr10	2092500	BmNPV	107500	8	0.000161941	0.0122869	2090000	2095000	105000	110000	8	1
Bomo_Chr10	2382500	BmNPV	82500	8	0.000161941	0.0122869	2380000	2385000	80000	85000	8	1
Bomo_Chr10	2437500	BmNPV	82500	8	0.000161941	0.0122869	2435000	2440000	80000	85000	8	1
Bomo_Chr10	2437500	BmNPV	92500	8	0.000161941	0.0122869	2435000	2440000	90000	95000	8	1
Bomo_Chr10	3587500	BmNPV	92500	44	3.62854e-48	1.20354e-45	3585000	3590000	0	130000	701	1
Bomo_Chr10	3627500	BmNPV	42500	50	3.45266e-57	1.23438e-54	3625000	3635000	0	130000	1546	1
Bomo_Chr10	3657500	BmNPV	42500	65	4.99507e-81	1.98415e-78	3655000	3660000	0	130000	1020	1
Bomo_Chr10	3667500	BmNPV	122500	51	1.00795e-58	3.64036e-56	3665000	3670000	0	130000	776	1
Bomo_Chr10	3677500	BmNPV	122500	44	3.62854e-48	1.20354e-45	3675000	3680000	0	130000	749	1
Bomo_Chr10	3692500	BmNPV	42500	64	2.18023e-79	8.61935e-77	3685000	3695000	0	130000	1854	1
Bomo_Chr10	3707500	BmNPV	82500	59	2.72403e-71	1.04835e-68	3705000	3710000	0	130000	985	1
Bomo_Chr10	3732500	BmNPV	62500	63	9.3699e-78	3.68737e-75	3725000	3735000	0	130000	2086	1
Bomo_Chr10	3762500	BmNPV	112500	56	1.60927e-66	6.06859e-64	3760000	3765000	0	130000	964	1
Bomo_Chr10	3837500	BmNPV	122500	58	1.07931e-69	4.12704e-67	3835000	3855000	0	130000	3380	1
Bomo_Chr10	3867500	BmNPV	42500	48	3.81628e-54	1.33413e-51	3865000	3870000	0	130000	743	1
Bomo_Chr10	3922500	BmNPV	42500	36	1.07686e-36	3.09954e-34	3920000	3925000	0	130000	636	1
Bomo_Chr10	4022500	BmNPV	82500	62	3.964e-76	1.55196e-73	4015000	4025000	0	130000	1865	1
Bomo_Chr10	4037500	BmNPV	62500	49	1.15952e-55	4.09994e-53	4035000	4040000	0	130000	777	1
Bomo_Chr10	5322500	BmNPV	22500	8	0.000161941	0.0122869	5320000	5325000	20000	25000	8	1
Bomo_Chr10	5472500	BmNPV	77500	8	0.000161941	0.0122869	5470000	5475000	75000	80000	8	1
Bomo_Chr10	5472500	BmNPV	122500	8	0.000161941	0.0122869	5470000	5475000	120000	125000	8	1
Bomo_Chr10	5922500	BmNPV	22500	16	6.94582e-12	1.04055e-09	5920000	5925000	0	35000	84	1
Bomo_Chr10	5922500	BmNPV	42500	20	2.88986e-16	5.22248e-14	5920000	5925000	40000	55000	42	1
Bomo_Chr10	5922500	BmNPV	92500	26	1.87403e-23	4.18485e-21	5920000	5925000	60000	115000	158	1
Bomo_Chr10	5922500	BmNPV	127500	17	6.05488e-13	9.56178e-11	5920000	5925000	120000	130000	30	1
Bomo_Chr10	7367500	BmNPV	42500	8	0.000161941	0.0122869	7365000	7370000	40000	45000	8	1
Bomo_Chr10	7367500	BmNPV	62500	8	0.000161941	0.0122869	7365000	7370000	60000	65000	8	1
Bomo_Chr10	7367500	BmNPV	112500	9	2.6311e-05	0.00226373	7365000	7370000	110000	115000	9	1
Bomo_Chr10	7367500	BmNPV	122500	10	3.86084e-06	0.000370259	7365000	7370000	120000	125000	10	1
Bomo_Chr10	8187500	BmNPV	92500	9	2.6311e-05	0.00226373	8185000	8190000	90000	95000	9	1
Bomo_Chr10	8577500	BmNPV	2500	8	0.000161941	0.0122869	8575000	8580000	0	5000	8	1
Bomo_Chr10	8577500	BmNPV	32500	10	3.86084e-06	0.000370259	8575000	8580000	30000	35000	10	1
Bomo_Chr10	8577500	BmNPV	42500	8	0.000161941	0.0122869	8575000	8580000	40000	50000	16	1
Bomo_Chr10	8577500	BmNPV	92500	8	0.000161941	0.0122869	8575000	8580000	90000	95000	8	1
Bomo_Chr10	8577500	BmNPV	102500	9	2.6311e-05	0.00226373	8575000	8580000	100000	105000	9	1
Bomo_Chr10	8577500	BmNPV	122500	11	5.16374e-07	5.44926e-05	8575000	8580000	120000	125000	11	1
Bomo_Chr10	8702500	BmNPV	112500	10	3.86084e-06	0.000370259	8700000	8705000	110000	115000	10	1
Bomo_Chr10	8912500	BmNPV	7500	16	6.94582e-12	1.04055e-09	8910000	8915000	0	25000	55	1
Bomo_Chr10	8912500	BmNPV	42500	17	6.05488e-13	9.56178e-11	8910000	8915000	30000	55000	61	1
Bomo_Chr10	8912500	BmNPV	77500	19	3.89442e-15	6.7524e-13	8910000	8915000	60000	85000	71	1
Bomo_Chr10	8912500	BmNPV	122500	20	2.88986e-16	5.22248e-14	8910000	8915000	90000	130000	108	1
Bomo_Chr10	9202500	BmNPV	97500	9	2.6311e-05	0.00226373	9200000	9205000	95000	100000	9	1
Bomo_Chr10	9747500	BmNPV	27500	8	0.000161941	0.0122869	9745000	9750000	25000	30000	8	1
Bomo_Chr10	10152500	BmNPV	7500	21	2.04303e-17	3.84409e-15	10150000	10155000	0	10000	37	1
Bomo_Chr10	10152500	BmNPV	42500	27	1.03186e-24	2.3743e-22	10150000	10155000	20000	85000	186	1
Bomo_Chr10	10152500	BmNPV	127500	22	1.37912e-18	2.69605e-16	10150000	10155000	90000	130000	131	1
Bomo_Chr10	10712500	BmNPV	47500	20	2.88986e-16	5.22248e-14	10710000	10715000	0	55000	155	1
Bomo_Chr10	10712500	BmNPV	97500	28	5.47941e-26	1.29754e-23	10710000	10715000	60000	130000	248	1
Bomo_Chr10	11742500	BmNPV	122500	9	2.6311e-05	0.00226373	11740000	11745000	120000	125000	9	1
Bomo_Chr10	12022500	BmNPV	77500	9	2.6311e-05	0.00226373	12020000	12025000	75000	80000	9	1
Bomo_Chr10	12022500	BmNPV	122500	9	2.6311e-05	0.00226373	12020000	12025000	120000	125000	9	1
Bomo_Chr10	12102500	BmNPV	127500	8	0.000161941	0.0122869	12100000	12105000	125000	130000	8	1
Bomo_Chr10	12127500	BmNPV	92500	8	0.000161941	0.0122869	12125000	12130000	90000	95000	8	1
Bomo_Chr10	12597500	BmNPV	7500	8	0.000161941	0.0122869	12595000	12600000	5000	10000	8	1
Bomo_Chr10	12847500	BmNPV	27500	8	0.000161941	0.0122869	12845000	12850000	25000	30000	8	1
Bomo_Chr10	12962500	BmNPV	112500	10	3.86084e-06	0.000370259	12960000	12965000	110000	115000	10	1
Bomo_Chr10	14997500	BmNPV	87500	10	3.86084e-06	0.000370259	14995000	15000000	85000	90000	10	1
Bomo_Chr10	15507500	BmNPV	12500	8	0.000161941	0.0122869	15505000	15510000	10000	15000	8	1
Bomo_Chr10	15962500	BmNPV	67500	8	0.000161941	0.0122869	15960000	15965000	65000	70000	8	1
Bomo_Chr10	15962500	BmNPV	112500	8	0.000161941	0.0122869	15960000	15965000	110000	115000	8	1
Bomo_Chr10	16077500	BmNPV	107500	8	0.000161941	0.0122869	16075000	16080000	105000	110000	8	1
Bomo_Chr10	16102500	BmNPV	42500	8	0.000161941	0.0122869	16100000	16105000	40000	45000	8	1
Bomo_Chr10	16817500	BmNPV	27500	14	7.60703e-10	1.01057e-07	16815000	16820000	10000	35000	59	1
Bomo_Chr10	16817500	BmNPV	47500	10	3.86084e-06	0.000370259	16815000	16820000	40000	50000	19	1
Bomo_Chr10	16817500	BmNPV	62500	13	7.20433e-09	8.93195e-07	16815000	16820000	55000	65000	24	1
Bomo_Chr10	16817500	BmNPV	97500	19	3.89442e-15	6.7524e-13	16815000	16820000	70000	105000	86	1
Bomo_Chr10	16817500	BmNPV	122500	13	7.20433e-09	8.93195e-07	16815000	16820000	120000	130000	24	1
Bomo_Chr10	16972500	BmNPV	62500	8	0.000161941	0.0122869	16970000	16975000	60000	65000	8	1
Bomo_Chr10	17517500	BmNPV	127500	8	0.000161941	0.0122869	17515000	17520000	125000	130000	8	1
Bomo_Chr11	67500	BmNPV	62500	8	0.000161941	0.0122869	65000	70000	60000	65000	8	1
Bomo_Chr11	212500	BmNPV	92500	54	2.23558e-63	8.29362e-61	210000	215000	0	130000	899	1
Bomo_Chr11	437500	BmNPV	92500	43	1.07255e-46	3.50685e-44	435000	440000	0	130000	702	1
Bomo_Chr11	577500	BmNPV	47500	9	2.6311e-05	0.00226373	575000	580000	45000	50000	9	1
Bomo_Chr11	577500	BmNPV	62500	8	0.000161941	0.0122869	575000	580000	60000	65000	8	1
Bomo_Chr11	577500	BmNPV	77500	9	2.6311e-05	0.00226373	575000	580000	75000	80000	9	1
Bomo_Chr11	577500	BmNPV	127500	10	3.86084e-06	0.000370259	575000	580000	120000	130000	18	1
Bomo_Chr11	627500	BmNPV	92500	49	1.15952e-55	4.09994e-53	625000	630000	0	130000	775	1
Bomo_Chr11	1012500	BmNPV	82500	8	0.000161941	0.0122869	1010000	1015000	80000	85000	8	1
Bomo_Chr11	1012500	BmNPV	112500	8	0.000161941	0.0122869	1010000	1015000	110000	115000	8	1
Bomo_Chr11	1012500	BmNPV	122500	9	2.6311e-05	0.00226373	1010000	1015000	120000	125000	9	1
Bomo_Chr11	1177500	BmNPV	27500	8	0.000161941	0.0122869	1175000	1180000	25000	30000	8	1
Bomo_Chr11	1177500	BmNPV	62500	10	3.86084e-06	0.000370259	1175000	1180000	60000	65000	10	1
Bomo_Chr11	1232500	BmNPV	122500	52	2.88604e-60	1.05177e-57	1230000	1235000	0	130000	921	1
Bomo_Chr11	1242500	BmNPV	62500	45	1.20034e-49	4.03745e-47	1240000	1245000	0	130000	728	1
Bomo_Chr11	1267500	BmNPV	122500	60	6.76062e-73	2.61759e-70	1265000	1270000	0	130000	1034	1
Bomo_Chr11	1422500	BmNPV	42500	43	1.07255e-46	3.50685e-44	1420000	1425000	0	130000	663	1
Bomo_Chr11	1482500	BmNPV	82500	59	2.72403e-71	1.04835e-68	1480000	1485000	0	130000	916	1
Bomo_Chr11	1497500	BmNPV	97500	43	1.07255e-46	3.50685e-44	1495000	1500000	0	130000	677	1
Bomo_Chr11	1562500	BmNPV	47500	58	1.07931e-69	4.12704e-67	1560000	1565000	0	130000	1023	1
Bomo_Chr11	1867500	BmNPV	82500	58	1.07931e-69	4.12704e-67	1860000	1870000	0	130000	1887	1
Bomo_Chr11	1877500	BmNPV	92500	47	1.23043e-52	4.24846e-50	1875000	1880000	0	130000	806	1
Bomo_Chr11	1897500	BmNPV	127500	47	1.23043e-52	4.24846e-50	1895000	1900000	0	130000	865	1
Bomo_Chr11	1972500	BmNPV	42500	60	6.76062e-73	2.61759e-70	1965000	1975000	0	130000	1656	1
Bomo_Chr11	2047500	BmNPV	92500	55	6.05227e-65	2.26411e-62	2045000	2050000	0	130000	949	1
Bomo_Chr11	2237500	BmNPV	112500	9	2.6311e-05	0.00226373	2235000	2240000	105000	115000	17	1
Bomo_Chr11	2247500	BmNPV	42500	8	0.000161941	0.0122869	2245000	2250000	40000	45000	8	1
Bomo_Chr11	2267500	BmNPV	47500	10	3.86084e-06	0.000370259	2265000	2275000	45000	55000	18	0.5
Bomo_Chr11	2267500	BmNPV	62500	9	2.6311e-05	0.00226373	2265000	2270000	60000	65000	9	1
Bomo_Chr11	2267500	BmNPV	82500	11	5.16374e-07	5.44926e-05	2265000	2270000	80000	85000	11	1
Bomo_Chr11	2267500	BmNPV	122500	8	0.000161941	0.0122869	2265000	2270000	120000	125000	8	1
Bomo_Chr11	2292500	BmNPV	42500	9	2.6311e-05	0.00226373	2290000	2295000	40000	45000	9	1
Bomo_Chr11	2292500	BmNPV	112500	9	2.6311e-05	0.00226373	2290000	2295000	110000	115000	9	1
Bomo_Chr11	2312500	BmNPV	77500	9	2.6311e-05	0.00226373	2310000	2315000	75000	80000	9	1
Bomo_Chr11	2312500	BmNPV	97500	9	2.6311e-05	0.00226373	2310000	2315000	95000	100000	9	1
Bomo_Chr11	2382500	BmNPV	82500	101	7.39351e-144	3.13348e-141	2360000	2385000	0	130000	6237	1
Bomo_Chr11	2402500	BmNPV	112500	42	3.09835e-45	9.96948e-43	2400000	2405000	0	130000	760	1
Bomo_Chr11	2462500	BmNPV	62500	65	4.99507e-81	1.98415e-78	2460000	2470000	0	130000	1976	1
Bomo_Chr11	2482500	BmNPV	122500	104	2.23622e-149	9.49583e-147	2480000	2485000	0	130000	1757	1
Bomo_Chr11	2527500	BmNPV	42500	45	1.20034e-49	4.03745e-47	2525000	2535000	0	130000	1460	1
Bomo_Chr11	2592500	BmNPV	82500	43	1.07255e-46	3.50685e-44	2590000	2595000	0	130000	713	1
Bomo_Chr11	2622500	BmNPV	62500	55	6.05227e-65	2.26411e-62	2620000	2625000	0	130000	925	1
Bomo_Chr11	2632500	BmNPV	127500	48	3.81628e-54	1.33413e-51	2630000	2635000	0	130000	764	1
Bomo_Chr11	2652500	BmNPV	82500	49	1.15952e-55	4.09994e-53	2650000	2655000	0	130000	803	1
Bomo_Chr11	2682500	BmNPV	62500	9	2.6311e-05	0.00226373	2680000	2685000	60000	65000	9	1
Bomo_Chr11	2682500	BmNPV	122500	10	3.86084e-06	0.000370259	2680000	2685000	120000	125000	10	1
Bomo_Chr11	2697500	BmNPV	92500	55	6.05227e-65	2.26411e-62	2695000	2700000	0	130000	932	1
Bomo_Chr11	2727500	BmNPV	7500	8	0.000161941	0.0122869	2725000	2730000	5000	10000	8	1
Bomo_Chr11	2727500	BmNPV	92500	9	2.6311e-05	0.00226373	2725000	2730000	90000	95000	9	1
Bomo_Chr11	2742500	BmNPV	92500	83	1.35688e-111	5.65787e-109	2740000	2745000	0	130000	1321	1
Bomo_Chr11	2777500	BmNPV	127500	90	5.85936e-124	2.46449e-121	2770000	2780000	0	130000	2239	1
Bomo_Chr11	2832500	BmNPV	92500	57	4.20397e-68	1.59708e-65	2825000	2835000	0	130000	1556	1
Bomo_Chr11	2847500	BmNPV	77500	78	6.45058e-103	2.66592e-100	2845000	2850000	0	130000	1302	1
Bomo_Chr11	2862500	BmNPV	122500	62	3.964e-76	1.55196e-73	2860000	2865000	0	130000	1093	1
Bomo_Chr11	2882500	BmNPV	42500	52	2.88604e-60	1.05177e-57	2880000	2885000	0	130000	955	1
Bomo_Chr11	2937500	BmNPV	82500	58	1.07931e-69	4.12704e-67	2930000	2940000	0	130000	1869	1
Bomo_Chr11	2967500	BmNPV	62500	58	1.07931e-69	4.12704e-67	2965000	2970000	0	130000	863	1
Bomo_Chr11	2987500	BmNPV	62500	73	2.23009e-94	9.112e-92	2985000	2995000	0	130000	2451	1
Bomo_Chr11	3012500	BmNPV	82500	66	1.12708e-82	4.49776e-80	3010000	3015000	0	130000	1047	1
Bomo_Chr11	3072500	BmNPV	92500	57	4.20397e-68	1.59708e-65	3065000	3075000	0	130000	1662	1
Bomo_Chr11	3092500	BmNPV	92500	49	1.15952e-55	4.09994e-53	3090000	3100000	0	130000	1611	1
Bomo_Chr11	3152500	BmNPV	102500	44	3.62854e-48	1.20354e-45	3150000	3155000	0	130000	707	1
Bomo_Chr11	3182500	BmNPV	92500	54	2.23558e-63	8.29362e-61	3180000	3185000	0	130000	921	1
Bomo_Chr11	3197500	BmNPV	92500	69	1.18418e-87	4.77835e-85	3195000	3205000	0	130000	1784	1
Bomo_Chr11	3642500	BmNPV	2500	8	0.000161941	0.0122869	3640000	3645000	0	5000	8	1
Bomo_Chr11	3857500	BmNPV	112500	8	0.000161941	0.0122869	3855000	3860000	110000	115000	8	1
Bomo_Chr11	4332500	BmNPV	42500	8	0.000161941	0.0122869	4330000	4335000	40000	45000	8	1
Bomo_Chr11	4377500	BmNPV	2500	8	0.000161941	0.0122869	4375000	4380000	0	5000	8	1
Bomo_Chr11	4377500	BmNPV	92500	8	0.000161941	0.0122869	4375000	4380000	90000	95000	8	1
Bomo_Chr11	4392500	BmNPV	22500	8	0.000161941	0.0122869	4390000	4395000	20000	25000	8	1
Bomo_Chr11	4392500	BmNPV	82500	9	2.6311e-05	0.00226373	4390000	4395000	80000	85000	9	1
Bomo_Chr11	4392500	BmNPV	122500	10	3.86084e-06	0.000370259	4390000	4395000	120000	125000	10	1
Bomo_Chr11	4402500	BmNPV	32500	10	3.86084e-06	0.000370259	4400000	4405000	30000	35000	10	1
Bomo_Chr11	4402500	BmNPV	82500	9	2.6311e-05	0.00226373	4400000	4405000	80000	85000	9	1
Bomo_Chr11	4402500	BmNPV	127500	8	0.000161941	0.0122869	4400000	4405000	125000	130000	8	1
Bomo_Chr11	4432500	BmNPV	22500	8	0.000161941	0.0122869	4430000	4435000	20000	25000	8	1
Bomo_Chr11	4432500	BmNPV	102500	8	0.000161941	0.0122869	4430000	4435000	100000	105000	8	1
Bomo_Chr11	4502500	BmNPV	92500	569	0	0	4500000	4505000	0	130000	9955	1
Bomo_Chr11	4512500	BmNPV	62500	10	3.86084e-06	0.000370259	4510000	4515000	60000	65000	10	1
Bomo_Chr11	4512500	BmNPV	77500	10	3.86084e-06	0.000370259	4510000	4515000	75000	80000	10	1
Bomo_Chr11	4512500	BmNPV	92500	9	2.6311e-05	0.00226373	4510000	4515000	90000	100000	18	1
Bomo_Chr11	4512500	BmNPV	122500	11	5.16374e-07	5.44926e-05	4510000	4515000	120000	130000	20	1
Bomo_Chr11	4522500	BmNPV	92500	377	0	0	4520000	4525000	0	130000	7012	1
Bomo_Chr11	4637500	BmNPV	7500	46	3.88458e-51	1.32434e-48	4635000	4640000	0	130000	738	1
Bomo_Chr11	4652500	BmNPV	122500	66	1.12708e-82	4.49776e-80	4650000	4655000	0	130000	1052	1
Bomo_Chr11	4672500	BmNPV	77500	65	4.99507e-81	1.98415e-78	4670000	4675000	0	130000	1059	1
Bomo_Chr11	4757500	BmNPV	62500	9	2.6311e-05	0.00226373	4755000	4760000	60000	65000	9	1
Bomo_Chr11	4757500	BmNPV	82500	8	0.000161941	0.0122869	4755000	4760000	80000	85000	8	1
Bomo_Chr11	4757500	BmNPV	92500	16	6.94582e-12	1.04055e-09	4755000	4760000	90000	95000	16	1
Bomo_Chr11	4797500	BmNPV	92500	39	6.47249e-41	1.97736e-38	4795000	4800000	0	130000	564	1
Bomo_Chr11	4852500	BmNPV	122500	50	3.45266e-57	1.23438e-54	4850000	4855000	0	130000	814	1
Bomo_Chr11	4912500	BmNPV	127500	39	6.47249e-41	1.97736e-38	4910000	4915000	0	130000	572	1
Bomo_Chr11	4932500	BmNPV	122500	30	1.39291e-28	3.48312e-26	4930000	4935000	0	130000	530	1
Bomo_Chr11	4942500	BmNPV	92500	56	1.60927e-66	6.06859e-64	4940000	4945000	0	130000	973	1
Bomo_Chr11	4977500	BmNPV	97500	42	3.09835e-45	9.96948e-43	4975000	4980000	0	130000	761	1
Bomo_Chr11	5032500	BmNPV	42500	63	9.3699e-78	3.68737e-75	5030000	5040000	0	130000	2058	1
Bomo_Chr11	5087500	BmNPV	82500	67	2.50519e-84	1.00355e-81	5085000	5090000	0	130000	1155	1
Bomo_Chr11	5102500	BmNPV	77500	59	2.72403e-71	1.04835e-68	5100000	5105000	0	130000	1006	1
Bomo_Chr11	5182500	BmNPV	22500	8	0.000161941	0.0122869	5180000	5185000	20000	25000	8	1
Bomo_Chr11	5182500	BmNPV	42500	8	0.000161941	0.0122869	5180000	5185000	40000	45000	8	1
Bomo_Chr11	5182500	BmNPV	62500	9	2.6311e-05	0.00226373	5180000	5185000	60000	65000	9	1
Bomo_Chr11	5182500	BmNPV	92500	14	7.60703e-10	1.01057e-07	5180000	5185000	90000	95000	14	1
Bomo_Chr11	5282500	BmNPV	112500	62	3.964e-76	1.55196e-73	5280000	5285000	0	130000	929	1
Bomo_Chr11	5307500	BmNPV	92500	68	5.48653e-86	2.2059e-83	5300000	5310000	0	130000	1900	1
Bomo_Chr11	5332500	BmNPV	62500	50	3.45266e-57	1.23438e-54	5330000	5345000	0	130000	2138	1
Bomo_Chr11	5367500	BmNPV	112500	53	8.10776e-62	2.98203e-59	5355000	5370000	0	130000	2256	1
Bomo_Chr11	5377500	BmNPV	122500	90	5.85936e-124	2.46449e-121	5375000	5395000	0	130000	4928	1
Bomo_Chr11	5437500	BmNPV	92500	212	0	0	5400000	5475000	0	130000	25317	1
Bomo_Chr11	5482500	BmNPV	107500	52	2.88604e-60	1.05177e-57	5480000	5485000	0	130000	988	1
Bomo_Chr11	5502500	BmNPV	77500	106	4.45774e-153	1.89461e-150	5490000	5520000	0	130000	8759	1
Bomo_Chr11	5527500	BmNPV	82500	64	2.18023e-79	8.61935e-77	5525000	5545000	0	130000	3882	1
Bomo_Chr11	5567500	BmNPV	127500	62	3.964e-76	1.55196e-73	5565000	5570000	0	130000	894	1
Bomo_Chr11	5652500	BmNPV	92500	166	1.37448e-270	5.89771e-268	5585000	5655000	0	130000	19554	1
Bomo_Chr11	5667500	BmNPV	122500	85	4.21573e-115	1.76304e-112	5660000	5685000	0	130000	5504	1
Bomo_Chr11	5697500	BmNPV	92500	84	2.40589e-113	1.00485e-110	5695000	5700000	0	130000	1399	1
Bomo_Chr11	5732500	BmNPV	122500	116	8.09739e-172	3.45232e-169	5710000	5735000	0	130000	6688	1
Bomo_Chr11	5767500	BmNPV	42500	233	0	0	5740000	5810000	0	130000	30521	0.994505
Bomo_Chr11	5837500	BmNPV	92500	61	1.65039e-74	6.42535e-72	5830000	5850000	0	130000	3570	1
Bomo_Chr11	5857500	BmNPV	82500	55	6.05227e-65	2.26411e-62	5855000	5860000	0	130000	1063	1
Bomo_Chr11	5872500	BmNPV	122500	49	1.15952e-55	4.09994e-53	5870000	5880000	0	130000	1399	1
Bomo_Chr11	5942500	BmNPV	92500	209	0	0	5885000	5985000	0	130000	34104	0.998077
Bomo_Chr11	6012500	BmNPV	92500	77	3.37827e-101	1.39372e-98	5995000	6025000	0	130000	5634	1
Bomo_Chr11	6042500	BmNPV	42500	73	2.23009e-94	9.112e-92	6030000	6070000	0	130000	7045	1
Bomo_Chr11	6087500	BmNPV	112500	52	2.88604e-60	1.05177e-57	6080000	6090000	0	130000	1496	1
Bomo_Chr11	6322500	BmNPV	42500	86	7.30116e-117	3.05714e-114	6320000	6325000	0	130000	1417	1
Bomo_Chr11	6482500	BmNPV	27500	22	1.37912e-18	2.69605e-16	6480000	6485000	0	35000	87	1
Bomo_Chr11	6482500	BmNPV	42500	19	3.89442e-15	6.7524e-13	6480000	6485000	40000	55000	41	1
Bomo_Chr11	6482500	BmNPV	77500	19	3.89442e-15	6.7524e-13	6480000	6485000	60000	130000	171	1
Bomo_Chr11	6617500	BmNPV	17500	9	2.6311e-05	0.00226373	6615000	6620000	10000	20000	17	1
Bomo_Chr11	6617500	BmNPV	47500	17	6.05488e-13	9.56178e-11	6615000	6620000	25000	50000	56	1
Bomo_Chr11	6617500	BmNPV	82500	13	7.20433e-09	8.93195e-07	6615000	6620000	65000	85000	48	1
Bomo_Chr11	6617500	BmNPV	102500	13	7.20433e-09	8.93195e-07	6615000	6620000	95000	115000	45	1
Bomo_Chr11	6617500	BmNPV	127500	13	7.20433e-09	8.93195e-07	6615000	6620000	120000	130000	21	1
Bomo_Chr11	8237500	BmNPV	92500	34	6.12853e-34	1.68891e-31	8235000	8240000	0	130000	629	1
Bomo_Chr11	8292500	BmNPV	122500	43	1.07255e-46	3.50685e-44	8290000	8295000	0	130000	587	1
Bomo_Chr11	8452500	BmNPV	2500	17	6.05488e-13	9.56178e-11	8450000	8455000	0	15000	42	1
Bomo_Chr11	8452500	BmNPV	127500	21	2.04303e-17	3.84409e-15	8450000	8455000	20000	130000	299	1
Bomo_Chr11	8592500	BmNPV	42500	43	1.07255e-46	3.50685e-44	8590000	8595000	0	130000	761	1
Bomo_Chr11	8672500	BmNPV	127500	70	2.51938e-89	1.0198e-86	8670000	8675000	0	130000	1078	1
Bomo_Chr11	8712500	BmNPV	82500	67	2.50519e-84	1.00355e-81	8710000	8715000	0	130000	1040	1
Bomo_Chr11	8777500	BmNPV	122500	36	1.07686e-36	3.09954e-34	8775000	8780000	0	130000	600	1
Bomo_Chr11	8872500	BmNPV	122500	51	1.00795e-58	3.64036e-56	8870000	8875000	0	130000	769	1
Bomo_Chr11	8882500	BmNPV	42500	43	1.07255e-46	3.50685e-44	8880000	8885000	0	130000	680	1
Bomo_Chr11	8942500	BmNPV	127500	47	1.23043e-52	4.24846e-50	8940000	8945000	0	130000	855	1
Bomo_Chr11	9107500	BmNPV	7500	13	7.20433e-09	8.93195e-07	9105000	9110000	0	15000	32	1
Bomo_Chr11	9107500	BmNPV	32500	19	3.89442e-15	6.7524e-13	9105000	9110000	20000	65000	138	1
Bomo_Chr11	9107500	BmNPV	82500	19	3.89442e-15	6.7524e-13	9105000	9110000	75000	85000	37	1
Bomo_Chr11	9107500	BmNPV	122500	23	8.90719e-20	1.80413e-17	9105000	9110000	90000	130000	122	1
Bomo_Chr11	9142500	BmNPV	82500	51	1.00795e-58	3.64036e-56	9140000	9145000	0	130000	759	1
Bomo_Chr11	9157500	BmNPV	92500	1106	0	0	9155000	9160000	0	130000	19395	1
Bomo_Chr11	9227500	BmNPV	27500	43	1.07255e-46	3.50685e-44	9225000	9230000	0	130000	687	1
Bomo_Chr11	9257500	BmNPV	122500	48	3.81628e-54	1.33413e-51	9255000	9260000	0	130000	871	1
Bomo_Chr11	9797500	BmNPV	77500	9	2.6311e-05	0.00226373	9795000	9800000	75000	80000	9	1
Bomo_Chr11	9837500	BmNPV	97500	8	0.000161941	0.0122869	9835000	9840000	95000	100000	8	1
Bomo_Chr11	9882500	BmNPV	122500	9	2.6311e-05	0.00226373	9880000	9885000	120000	125000	9	1
Bomo_Chr11	10762500	BmNPV	122500	8	0.000161941	0.0122869	10760000	10765000	120000	125000	8	1
Bomo_Chr11	10847500	BmNPV	92500	58	1.07931e-69	4.12704e-67	10845000	10850000	0	130000	893	1
Bomo_Chr11	10927500	BmNPV	62500	47	1.23043e-52	4.24846e-50	10925000	10930000	0	130000	761	1
Bomo_Chr11	11337500	BmNPV	77500	8	0.000161941	0.0122869	11335000	11340000	75000	80000	8	1
Bomo_Chr11	11382500	BmNPV	122500	54	2.23558e-63	8.29362e-61	11380000	11385000	0	130000	754	1
Bomo_Chr11	11402500	BmNPV	82500	77	3.37827e-101	1.39372e-98	11395000	11405000	0	130000	2276	1
Bomo_Chr11	11412500	BmNPV	122500	51	1.00795e-58	3.64036e-56	11410000	11415000	0	130000	717	1
Bomo_Chr11	11422500	BmNPV	92500	40	2.40829e-42	7.49264e-40	11420000	11425000	0	130000	669	1
Bomo_Chr11	11432500	BmNPV	27500	28	5.47941e-26	1.29754e-23	11430000	11435000	0	35000	130	1
Bomo_Chr11	11432500	BmNPV	92500	33	1.40054e-32	3.77157e-30	11430000	11435000	40000	130000	365	1
Bomo_Chr11	11477500	BmNPV	42500	46	3.88458e-51	1.32434e-48	11475000	11480000	0	130000	663	1
Bomo_Chr11	11652500	BmNPV	47500	8	0.000161941	0.0122869	11650000	11655000	45000	50000	8	1
Bomo_Chr11	11702500	BmNPV	92500	49	1.15952e-55	4.09994e-53	11700000	11705000	0	130000	744	1
Bomo_Chr11	11887500	BmNPV	82500	53	8.10776e-62	2.98203e-59	11885000	11890000	0	130000	970	1
Bomo_Chr11	12262500	BmNPV	122500	47	1.23043e-52	4.24846e-50	12260000	12265000	0	130000	788	1
Bomo_Chr11	12942500	BmNPV	37500	8	0.000161941	0.0122869	12940000	12945000	35000	40000	8	1
Bomo_Chr11	13612500	BmNPV	42500	46	3.88458e-51	1.32434e-48	13610000	13615000	0	130000	734	1
Bomo_Chr11	13622500	BmNPV	92500	39	6.47249e-41	1.97736e-38	13620000	13625000	0	130000	590	1
Bomo_Chr11	13672500	BmNPV	42500	36	1.07686e-36	3.09954e-34	13670000	13675000	0	130000	693	1
Bomo_Chr11	13687500	BmNPV	82500	46	3.88458e-51	1.32434e-48	13685000	13695000	0	130000	1496	1
Bomo_Chr11	13712500	BmNPV	127500	50	3.45266e-57	1.23438e-54	13710000	13720000	0	130000	1569	1
Bomo_Chr11	13752500	BmNPV	42500	43	1.07255e-46	3.50685e-44	13750000	13755000	0	130000	710	1
Bomo_Chr11	13847500	BmNPV	92500	40	2.40829e-42	7.49264e-40	13845000	13850000	0	130000	664	1
Bomo_Chr11	13917500	BmNPV	82500	43	1.07255e-46	3.50685e-44	13915000	13920000	0	130000	709	1
Bomo_Chr11	13932500	BmNPV	82500	47	1.23043e-52	4.24846e-50	13925000	13935000	0	130000	1385	1
Bomo_Chr11	13947500	BmNPV	82500	45	1.20034e-49	4.03745e-47	13940000	13950000	0	130000	1245	0.980769
Bomo_Chr11	13987500	BmNPV	2500	19	3.89442e-15	6.7524e-13	13985000	13990000	0	15000	43	1
Bomo_Chr11	13987500	BmNPV	42500	23	8.90719e-20	1.80413e-17	13985000	13990000	20000	55000	127	1
Bomo_Chr11	13987500	BmNPV	112500	28	5.47941e-26	1.29754e-23	13985000	13990000	60000	130000	278	1
Bomo_Chr11	14047500	BmNPV	122500	41	8.74266e-44	2.76809e-41	14040000	14050000	0	130000	1398	1
Bomo_Chr11	14067500	BmNPV	122500	44	3.62854e-48	1.20354e-45	14065000	14070000	0	130000	694	1
Bomo_Chr11	14152500	BmNPV	92500	40	2.40829e-42	7.49264e-40	14150000	14155000	0	130000	642	1
Bomo_Chr11	14227500	BmNPV	2500	31	6.68321e-30	1.71471e-27	14225000	14230000	0	15000	81	1
Bomo_Chr11	14227500	BmNPV	112500	46	3.88458e-51	1.32434e-48	14225000	14230000	20000	130000	709	1
Bomo_Chr11	14367500	BmNPV	82500	75	8.91267e-98	3.65966e-95	14365000	14370000	0	130000	1376	1
Bomo_Chr11	14387500	BmNPV	92500	64	2.18023e-79	8.61935e-77	14385000	14390000	0	130000	964	1
Bomo_Chr11	14397500	BmNPV	122500	62	3.964e-76	1.55196e-73	14395000	14415000	0	130000	3809	0.990385
Bomo_Chr11	14437500	BmNPV	82500	74	4.48826e-96	1.83881e-93	14425000	14445000	0	130000	3911	1
Bomo_Chr11	14452500	BmNPV	32500	49	1.15952e-55	4.09994e-53	14450000	14455000	0	130000	767	1
Bomo_Chr11	14472500	BmNPV	62500	41	8.74266e-44	2.76809e-41	14465000	14475000	0	130000	1347	1
Bomo_Chr11	14482500	BmNPV	77500	50	3.45266e-57	1.23438e-54	14480000	14485000	0	130000	852	1
Bomo_Chr11	14502500	BmNPV	77500	64	2.18023e-79	8.61935e-77	14490000	14505000	0	130000	2862	1
Bomo_Chr11	14512500	BmNPV	97500	59	2.72403e-71	1.04835e-68	14510000	14515000	0	130000	989	1
Bomo_Chr11	14522500	BmNPV	47500	39	6.47249e-41	1.97736e-38	14520000	14525000	0	130000	735	1
Bomo_Chr11	14532500	BmNPV	42500	73	2.23009e-94	9.112e-92	14530000	14535000	0	130000	1179	1
Bomo_Chr11	14667500	BmNPV	82500	51	1.00795e-58	3.64036e-56	14665000	14670000	0	130000	959	1
Bomo_Chr11	14867500	BmNPV	82500	49	1.15952e-55	4.09994e-53	14865000	14870000	0	130000	808	1
Bomo_Chr11	14887500	BmNPV	92500	57	4.20397e-68	1.59708e-65	14885000	14890000	0	130000	842	1
Bomo_Chr11	15237500	BmNPV	122500	43	1.07255e-46	3.50685e-44	15235000	15240000	0	130000	672	1
Bomo_Chr11	15257500	BmNPV	97500	38	1.69613e-39	5.08407e-37	15255000	15260000	0	130000	572	1
Bomo_Chr11	15342500	BmNPV	77500	42	3.09835e-45	9.96948e-43	15340000	15345000	0	130000	621	1
Bomo_Chr11	15357500	BmNPV	92500	37	4.331e-38	1.27326e-35	15355000	15360000	0	130000	660	1
Bomo_Chr11	15367500	BmNPV	82500	37	4.331e-38	1.27326e-35	15365000	15370000	0	130000	617	1
Bomo_Chr11	15432500	BmNPV	82500	9	2.6311e-05	0.00226373	15430000	15435000	80000	85000	9	1
Bomo_Chr11	15507500	BmNPV	122500	65	4.99507e-81	1.98415e-78	15505000	15515000	0	130000	1797	1
Bomo_Chr11	16407500	BmNPV	62500	8	0.000161941	0.0122869	16405000	16410000	60000	65000	8	1
Bomo_Chr11	16472500	BmNPV	82500	8	0.000161941	0.0122869	16470000	16475000	80000	85000	8	1
Bomo_Chr11	16587500	BmNPV	62500	58	1.07931e-69	4.12704e-67	16585000	16590000	0	130000	921	1
Bomo_Chr11	16932500	BmNPV	52500	8	0.000161941	0.0122869	16930000	16935000	50000	55000	8	1
Bomo_Chr11	17872500	BmNPV	67500	8	0.000161941	0.0122869	17870000	17875000	65000	70000	8	1
Bomo_Chr11	18102500	BmNPV	82500	8	0.000161941	0.0122869	18100000	18105000	80000	85000	8	1
Bomo_Chr11	18102500	BmNPV	92500	8	0.000161941	0.0122869	18100000	18105000	90000	95000	8	1
Bomo_Chr11	18972500	BmNPV	47500	10	3.86084e-06	0.000370259	18970000	18975000	45000	50000	10	1
Bomo_Chr11	18972500	BmNPV	62500	9	2.6311e-05	0.00226373	18970000	18975000	60000	65000	9	1
Bomo_Chr11	19572500	BmNPV	42500	8	0.000161941	0.0122869	19570000	19575000	40000	45000	8	1
Bomo_Chr11	19572500	BmNPV	62500	8	0.000161941	0.0122869	19570000	19575000	60000	65000	8	1
Bomo_Chr11	20392500	BmNPV	102500	8	0.000161941	0.0122869	20390000	20395000	100000	105000	8	1
Bomo_Chr12	62500	BmNPV	122500	9	2.6311e-05	0.00226373	60000	65000	120000	125000	9	1
Bomo_Chr12	182500	BmNPV	42500	10	3.86084e-06	0.000370259	180000	185000	40000	45000	10	1
Bomo_Chr12	247500	BmNPV	7500	8	0.000161941	0.0122869	245000	250000	5000	10000	8	1
Bomo_Chr12	1862500	BmNPV	82500	8	0.000161941	0.0122869	1860000	1865000	80000	85000	8	1
Bomo_Chr12	2157500	BmNPV	97500	8	0.000161941	0.0122869	2155000	2160000	95000	100000	8	1
Bomo_Chr12	6377500	BmNPV	92500	8	0.000161941	0.0122869	6375000	6380000	90000	95000	8	1
Bomo_Chr12	7787500	BmNPV	42500	58	1.07931e-69	4.12704e-67	7785000	7790000	0	130000	831	1
Bomo_Chr12	7902500	BmNPV	97500	8	0.000161941	0.0122869	7900000	7905000	95000	100000	8	1
Bomo_Chr12	8292500	BmNPV	122500	8	0.000161941	0.0122869	8290000	8295000	120000	125000	8	1
Bomo_Chr12	8407500	BmNPV	112500	56	1.60927e-66	6.06859e-64	8405000	8410000	0	130000	959	1
Bomo_Chr12	8422500	BmNPV	42500	79	1.21611e-104	5.03671e-102	8415000	8425000	0	130000	2374	1
Bomo_Chr12	8437500	BmNPV	92500	113	3.72593e-166	1.5872e-163	8430000	8445000	0	130000	4474	1
Bomo_Chr12	8452500	BmNPV	122500	84	2.40589e-113	1.00485e-110	8450000	8455000	0	130000	1296	1
Bomo_Chr12	8472500	BmNPV	42500	82	7.56147e-110	3.1484e-107	8470000	8475000	0	130000	1380	1
Bomo_Chr12	8502500	BmNPV	92500	56	1.60927e-66	6.06859e-64	8500000	8505000	0	130000	950	1
Bomo_Chr12	8612500	BmNPV	112500	8	0.000161941	0.0122869	8610000	8615000	110000	115000	8	1
Bomo_Chr12	8797500	BmNPV	122500	67	2.50519e-84	1.00355e-81	8795000	8800000	0	130000	1002	1
Bomo_Chr12	8812500	BmNPV	62500	48	3.81628e-54	1.33413e-51	8810000	8815000	0	130000	817	1
Bomo_Chr12	8827500	BmNPV	127500	34	6.12853e-34	1.68891e-31	8825000	8830000	0	130000	650	1
Bomo_Chr12	8857500	BmNPV	92500	46	3.88458e-51	1.32434e-48	8855000	8860000	0	130000	823	1
Bomo_Chr12	8882500	BmNPV	92500	35	2.60532e-35	7.34252e-33	8880000	8885000	0	130000	570	1
Bomo_Chr12	8902500	BmNPV	92500	54	2.23558e-63	8.29362e-61	8900000	8905000	0	130000	760	1
Bomo_Chr12	8922500	BmNPV	97500	9	2.6311e-05	0.00226373	8920000	8925000	95000	100000	9	1
Bomo_Chr12	8942500	BmNPV	92500	53	8.10776e-62	2.98203e-59	8940000	8945000	0	130000	1012	1
Bomo_Chr12	8952500	BmNPV	92500	73	2.23009e-94	9.112e-92	8950000	8955000	0	130000	1266	1
Bomo_Chr12	9022500	BmNPV	42500	79	1.21611e-104	5.03671e-102	9020000	9030000	0	130000	2053	1
Bomo_Chr12	9062500	BmNPV	42500	60	6.76062e-73	2.61759e-70	9055000	9065000	0	130000	1894	1
Bomo_Chr12	9072500	BmNPV	42500	52	2.88604e-60	1.05177e-57	9070000	9075000	0	130000	909	1
Bomo_Chr12	9092500	BmNPV	62500	58	1.07931e-69	4.12704e-67	9090000	9095000	0	130000	874	1
Bomo_Chr12	9112500	BmNPV	82500	60	6.76062e-73	2.61759e-70	9110000	9120000	0	130000	1933	1
Bomo_Chr12	9142500	BmNPV	77500	60	6.76062e-73	2.61759e-70	9140000	9145000	0	130000	1017	1
Bomo_Chr12	9182500	BmNPV	127500	69	1.18418e-87	4.77835e-85	9180000	9185000	0	130000	1159	1
Bomo_Chr12	9852500	BmNPV	122500	49	1.15952e-55	4.09994e-53	9850000	9855000	0	130000	788	1
Bomo_Chr12	9877500	BmNPV	82500	40	2.40829e-42	7.49264e-40	9875000	9880000	0	130000	648	1
Bomo_Chr12	9932500	BmNPV	32500	34	6.12853e-34	1.68891e-31	9930000	9935000	0	130000	538	1
Bomo_Chr12	9982500	BmNPV	92500	48	3.81628e-54	1.33413e-51	9980000	9985000	0	130000	712	1
Bomo_Chr12	10592500	BmNPV	42500	13	7.20433e-09	8.93195e-07	10590000	10595000	40000	45000	13	1
Bomo_Chr12	10592500	BmNPV	62500	10	3.86084e-06	0.000370259	10590000	10595000	60000	65000	10	1
Bomo_Chr12	10592500	BmNPV	82500	8	0.000161941	0.0122869	10590000	10595000	80000	85000	8	1
Bomo_Chr12	10592500	BmNPV	122500	11	5.16374e-07	5.44926e-05	10590000	10595000	120000	125000	11	1
Bomo_Chr12	10647500	BmNPV	47500	9	2.6311e-05	0.00226373	10645000	10650000	45000	50000	9	1
Bomo_Chr12	10647500	BmNPV	107500	9	2.6311e-05	0.00226373	10645000	10650000	105000	110000	9	1
Bomo_Chr12	11372500	BmNPV	102500	8	0.000161941	0.0122869	11370000	11375000	100000	105000	8	1
Bomo_Chr12	11717500	BmNPV	122500	9	2.6311e-05	0.00226373	11715000	11720000	120000	125000	9	1
Bomo_Chr12	12087500	BmNPV	82500	49	1.15952e-55	4.09994e-53	12085000	12095000	0	130000	1551	1
Bomo_Chr12	12267500	BmNPV	122500	40	2.40829e-42	7.49264e-40	12265000	12270000	0	130000	626	1
Bomo_Chr12	13162500	BmNPV	77500	9	2.6311e-05	0.00226373	13160000	13165000	75000	80000	9	1
Bomo_Chr12	13677500	BmNPV	42500	8	0.000161941	0.0122869	13675000	13680000	40000	45000	8	1
Bomo_Chr12	13677500	BmNPV	127500	8	0.000161941	0.0122869	13675000	13680000	125000	130000	8	1
Bomo_Chr12	13712500	BmNPV	47500	8	0.000161941	0.0122869	13710000	13715000	45000	50000	8	1
Bomo_Chr12	13797500	BmNPV	97500	8	0.000161941	0.0122869	13795000	13800000	95000	100000	8	1
Bomo_Chr12	13907500	BmNPV	2500	8	0.000161941	0.0122869	13905000	13910000	0	5000	8	1
Bomo_Chr12	13982500	BmNPV	2500	8	0.000161941	0.0122869	13980000	13985000	0	5000	8	1
Bomo_Chr12	14112500	BmNPV	112500	8	0.000161941	0.0122869	14110000	14115000	110000	115000	8	1
Bomo_Chr12	14227500	BmNPV	2500	9	2.6311e-05	0.00226373	14225000	14230000	0	5000	9	1
Bomo_Chr12	14227500	BmNPV	42500	8	0.000161941	0.0122869	14225000	14230000	40000	50000	16	1
Bomo_Chr12	14227500	BmNPV	67500	10	3.86084e-06	0.000370259	14225000	14230000	65000	70000	10	1
Bomo_Chr12	14227500	BmNPV	77500	9	2.6311e-05	0.00226373	14225000	14230000	75000	85000	18	1
Bomo_Chr12	14227500	BmNPV	112500	9	2.6311e-05	0.00226373	14225000	14230000	110000	115000	9	1
Bomo_Chr12	14227500	BmNPV	122500	9	2.6311e-05	0.00226373	14225000	14230000	120000	130000	18	1
Bomo_Chr12	14667500	BmNPV	62500	9	2.6311e-05	0.00226373	14665000	14670000	60000	65000	9	1
Bomo_Chr12	15397500	BmNPV	42500	8	0.000161941	0.0122869	15395000	15400000	40000	45000	8	1
Bomo_Chr12	16072500	BmNPV	82500	8	0.000161941	0.0122869	16070000	16075000	80000	85000	8	1
Bomo_Chr12	16982500	BmNPV	102500	9	2.6311e-05	0.00226373	16980000	16985000	100000	105000	9	1
Bomo_Chr12	17062500	BmNPV	42500	33	1.40054e-32	3.77157e-30	17060000	17065000	0	130000	518	1
Bomo_Chr12	17122500	BmNPV	92500	48	3.81628e-54	1.33413e-51	17120000	17125000	0	130000	793	1
Bomo_Chr12	17312500	BmNPV	92500	50	3.45266e-57	1.23438e-54	17310000	17315000	0	130000	955	1
Bomo_Chr13	157500	BmNPV	97500	10	3.86084e-06	0.000370259	155000	160000	95000	100000	10	1
Bomo_Chr13	197500	BmNPV	122500	9	2.6311e-05	0.00226373	195000	200000	120000	125000	9	1
Bomo_Chr13	397500	BmNPV	82500	9	2.6311e-05	0.00226373	395000	400000	80000	85000	9	1
Bomo_Chr13	447500	BmNPV	77500	36	1.07686e-36	3.09954e-34	445000	450000	0	130000	563	1
Bomo_Chr13	872500	BmNPV	42500	8	0.000161941	0.0122869	870000	875000	40000	45000	8	1
Bomo_Chr13	1077500	BmNPV	7500	9	2.6311e-05	0.00226373	1075000	1080000	5000	15000	18	1
Bomo_Chr13	1077500	BmNPV	82500	20	2.88986e-16	5.22248e-14	1075000	1080000	20000	130000	266	1
Bomo_Chr13	1467500	BmNPV	62500	8	0.000161941	0.0122869	1465000	1470000	60000	65000	8	1
Bomo_Chr13	2832500	BmNPV	32500	53	8.10776e-62	2.98203e-59	2830000	2835000	0	130000	875	1
Bomo_Chr13	3042500	BmNPV	112500	9	2.6311e-05	0.00226373	3040000	3045000	110000	115000	9	1
Bomo_Chr13	3202500	BmNPV	22500	8	0.000161941	0.0122869	3200000	3205000	20000	25000	8	1
Bomo_Chr13	3202500	BmNPV	122500	8	0.000161941	0.0122869	3200000	3205000	120000	125000	8	1
Bomo_Chr13	3222500	BmNPV	42500	89	3.54052e-122	1.48762e-119	3220000	3225000	0	130000	1634	1
Bomo_Chr13	3232500	BmNPV	92500	60	6.76062e-73	2.61759e-70	3230000	3235000	0	130000	993	1
Bomo_Chr13	3372500	BmNPV	12500	19	3.89442e-15	6.7524e-13	3370000	3375000	0	15000	51	1
Bomo_Chr13	3372500	BmNPV	47500	28	5.47941e-26	1.29754e-23	3370000	3375000	20000	130000	398	1
Bomo_Chr13	3457500	BmNPV	47500	44	3.62854e-48	1.20354e-45	3455000	3460000	0	130000	710	1
Bomo_Chr13	4377500	BmNPV	92500	8	0.000161941	0.0122869	4375000	4380000	90000	95000	8	1
Bomo_Chr13	4402500	BmNPV	82500	8	0.000161941	0.0122869	4400000	4405000	80000	85000	8	1
Bomo_Chr13	4402500	BmNPV	97500	8	0.000161941	0.0122869	4400000	4405000	95000	100000	8	1
Bomo_Chr13	4912500	BmNPV	122500	61	1.65039e-74	6.42535e-72	4905000	4915000	0	130000	1624	1
Bomo_Chr13	4932500	BmNPV	112500	37	4.331e-38	1.27326e-35	4930000	4935000	0	130000	701	1
Bomo_Chr13	5237500	BmNPV	127500	85	4.21573e-115	1.76304e-112	5235000	5240000	0	130000	1329	1
Bomo_Chr13	5247500	BmNPV	127500	89	3.54052e-122	1.48762e-119	5245000	5255000	0	130000	2769	1
Bomo_Chr13	5262500	BmNPV	92500	143	3.35582e-224	1.43758e-221	5260000	5265000	0	130000	2483	1
Bomo_Chr13	5357500	BmNPV	7500	12	6.34341e-08	7.28518e-06	5355000	5360000	5000	10000	12	1
Bomo_Chr13	5357500	BmNPV	62500	10	3.86084e-06	0.000370259	5355000	5360000	55000	65000	18	1
Bomo_Chr13	5357500	BmNPV	77500	9	2.6311e-05	0.00226373	5355000	5360000	75000	80000	9	1
Bomo_Chr13	5657500	BmNPV	42500	8	0.000161941	0.0122869	5655000	5660000	40000	45000	8	1
Bomo_Chr13	6232500	BmNPV	92500	9	2.6311e-05	0.00226373	6230000	6235000	90000	95000	9	1
Bomo_Chr13	7017500	BmNPV	92500	8	0.000161941	0.0122869	7015000	7020000	90000	95000	8	1
Bomo_Chr13	8067500	BmNPV	42500	8	0.000161941	0.0122869	8065000	8070000	40000	45000	8	1
Bomo_Chr13	8267500	BmNPV	92500	9	2.6311e-05	0.00226373	8265000	8270000	90000	95000	9	1
Bomo_Chr13	9212500	BmNPV	7500	10	3.86084e-06	0.000370259	9210000	9215000	5000	10000	10	1
Bomo_Chr13	9212500	BmNPV	27500	15	7.50423e-11	1.06161e-08	9210000	9215000	25000	35000	26	1
Bomo_Chr13	9212500	BmNPV	42500	12	6.34341e-08	7.28518e-06	9210000	9215000	40000	55000	30	1
Bomo_Chr13	9212500	BmNPV	82500	10	3.86084e-06	0.000370259	9210000	9215000	80000	85000	10	1
Bomo_Chr13	9212500	BmNPV	97500	10	3.86084e-06	0.000370259	9210000	9215000	90000	105000	30	1
Bomo_Chr13	9212500	BmNPV	112500	9	2.6311e-05	0.00226373	9210000	9215000	110000	115000	9	1
Bomo_Chr13	9212500	BmNPV	127500	13	7.20433e-09	8.93195e-07	9210000	9215000	120000	130000	25	1
Bomo_Chr13	9502500	BmNPV	97500	8	0.000161941	0.0122869	9500000	9505000	95000	100000	8	1
Bomo_Chr13	10052500	BmNPV	42500	8	0.000161941	0.0122869	10050000	10055000	40000	45000	8	1
Bomo_Chr13	10697500	BmNPV	7500	10	3.86084e-06	0.000370259	10695000	10700000	0	15000	27	1
Bomo_Chr13	10697500	BmNPV	32500	14	7.60703e-10	1.01057e-07	10695000	10700000	25000	35000	24	1
Bomo_Chr13	10697500	BmNPV	42500	12	6.34341e-08	7.28518e-06	10695000	10700000	40000	50000	21	1
Bomo_Chr13	10697500	BmNPV	62500	14	7.60703e-10	1.01057e-07	10695000	10700000	60000	65000	14	1
Bomo_Chr13	10697500	BmNPV	77500	15	7.50423e-11	1.06161e-08	10695000	10700000	75000	95000	48	1
Bomo_Chr13	10697500	BmNPV	107500	17	6.05488e-13	9.56178e-11	10695000	10700000	105000	115000	30	1
Bomo_Chr13	10697500	BmNPV	122500	12	6.34341e-08	7.28518e-06	10695000	10700000	120000	130000	23	1
Bomo_Chr13	11422500	BmNPV	27500	8	0.000161941	0.0122869	11420000	11425000	25000	30000	8	1
Bomo_Chr13	14652500	BmNPV	82500	9	2.6311e-05	0.00226373	14650000	14655000	80000	85000	9	1
Bomo_Chr13	15842500	BmNPV	42500	10	3.86084e-06	0.000370259	15840000	15845000	40000	45000	10	1
Bomo_Chr13	16097500	BmNPV	32500	8	0.000161941	0.0122869	16095000	16100000	30000	35000	8	1
Bomo_Chr13	17047500	BmNPV	127500	8	0.000161941	0.0122869	17045000	17050000	125000	130000	8	1
Bomo_Chr13	17437500	BmNPV	122500	10	3.86084e-06	0.000370259	17435000	17440000	120000	125000	10	1
Bomo_Chr13	17447500	BmNPV	42500	9	2.6311e-05	0.00226373	17445000	17450000	40000	45000	9	1
Bomo_Chr13	17462500	BmNPV	112500	8	0.000161941	0.0122869	17460000	17465000	110000	115000	8	1
Bomo_Chr14	107500	BmNPV	57500	8	0.000161941	0.0122869	105000	110000	55000	60000	8	1
Bomo_Chr14	107500	BmNPV	102500	10	3.86084e-06	0.000370259	105000	110000	100000	105000	10	1
Bomo_Chr14	292500	BmNPV	82500	9	2.6311e-05	0.00226373	290000	295000	80000	85000	9	1
Bomo_Chr14	292500	BmNPV	102500	8	0.000161941	0.0122869	290000	295000	100000	105000	8	1
Bomo_Chr14	292500	BmNPV	127500	9	2.6311e-05	0.00226373	290000	295000	125000	130000	9	1
Bomo_Chr14	422500	BmNPV	97500	9	2.6311e-05	0.00226373	420000	425000	95000	100000	9	1
Bomo_Chr14	422500	BmNPV	122500	8	0.000161941	0.0122869	420000	425000	120000	125000	8	1
Bomo_Chr14	442500	BmNPV	42500	8	0.000161941	0.0122869	440000	445000	40000	45000	8	1
Bomo_Chr14	442500	BmNPV	82500	8	0.000161941	0.0122869	440000	445000	80000	85000	8	1
Bomo_Chr14	442500	BmNPV	112500	8	0.000161941	0.0122869	440000	445000	110000	115000	8	1
Bomo_Chr14	1422500	BmNPV	62500	8	0.000161941	0.0122869	1420000	1425000	60000	65000	8	1
Bomo_Chr14	2342500	BmNPV	92500	9	2.6311e-05	0.00226373	2340000	2345000	90000	95000	9	1
Bomo_Chr14	2367500	BmNPV	127500	393	0	0	2365000	2370000	0	130000	7079	1
Bomo_Chr14	2527500	BmNPV	27500	8	0.000161941	0.0122869	2525000	2530000	25000	30000	8	1
Bomo_Chr14	2527500	BmNPV	62500	8	0.000161941	0.0122869	2525000	2530000	60000	65000	8	1
Bomo_Chr14	2527500	BmNPV	92500	8	0.000161941	0.0122869	2525000	2530000	90000	95000	8	1
Bomo_Chr14	2527500	BmNPV	127500	9	2.6311e-05	0.00226373	2525000	2530000	125000	130000	9	1
Bomo_Chr14	2737500	BmNPV	47500	9	2.6311e-05	0.00226373	2735000	2740000	45000	50000	9	1
Bomo_Chr14	2737500	BmNPV	82500	8	0.000161941	0.0122869	2735000	2740000	80000	85000	8	1
Bomo_Chr14	3137500	BmNPV	92500	8	0.000161941	0.0122869	3135000	3140000	90000	95000	8	1
Bomo_Chr14	3177500	BmNPV	42500	9	2.6311e-05	0.00226373	3175000	3180000	40000	45000	9	1
Bomo_Chr14	3347500	BmNPV	97500	10	3.86084e-06	0.000370259	3345000	3350000	95000	100000	10	1
Bomo_Chr14	3727500	BmNPV	102500	8	0.000161941	0.0122869	3725000	3730000	100000	105000	8	1
Bomo_Chr14	5302500	BmNPV	82500	8	0.000161941	0.0122869	5300000	5305000	80000	85000	8	1
Bomo_Chr14	5352500	BmNPV	42500	8	0.000161941	0.0122869	5350000	5355000	40000	45000	8	1
Bomo_Chr14	5487500	BmNPV	127500	9	2.6311e-05	0.00226373	5485000	5490000	125000	130000	9	1
Bomo_Chr14	6007500	BmNPV	62500	8	0.000161941	0.0122869	6005000	6010000	60000	65000	8	1
Bomo_Chr14	6502500	BmNPV	7500	10	3.86084e-06	0.000370259	6500000	6505000	5000	10000	10	1
Bomo_Chr14	6502500	BmNPV	27500	11	5.16374e-07	5.44926e-05	6500000	6505000	20000	35000	30	1
Bomo_Chr14	6502500	BmNPV	47500	15	7.50423e-11	1.06161e-08	6500000	6505000	40000	55000	38	1
Bomo_Chr14	6502500	BmNPV	62500	11	5.16374e-07	5.44926e-05	6500000	6505000	60000	70000	19	1
Bomo_Chr14	6502500	BmNPV	82500	11	5.16374e-07	5.44926e-05	6500000	6505000	80000	85000	11	1
Bomo_Chr14	6502500	BmNPV	92500	8	0.000161941	0.0122869	6500000	6505000	90000	95000	8	1
Bomo_Chr14	6502500	BmNPV	102500	13	7.20433e-09	8.93195e-07	6500000	6505000	100000	105000	13	1
Bomo_Chr14	6502500	BmNPV	112500	9	2.6311e-05	0.00226373	6500000	6505000	110000	115000	9	1
Bomo_Chr14	6502500	BmNPV	127500	10	3.86084e-06	0.000370259	6500000	6505000	120000	130000	19	1
Bomo_Chr14	6652500	BmNPV	122500	44	3.62854e-48	1.20354e-45	6650000	6655000	0	130000	696	1
Bomo_Chr14	6747500	BmNPV	12500	15	7.50423e-11	1.06161e-08	6745000	6750000	5000	15000	28	1
Bomo_Chr14	6747500	BmNPV	62500	16	6.94582e-12	1.04055e-09	6745000	6750000	20000	65000	108	1
Bomo_Chr14	6747500	BmNPV	122500	21	2.04303e-17	3.84409e-15	6745000	6750000	70000	130000	171	1
Bomo_Chr14	6937500	BmNPV	62500	47	1.23043e-52	4.24846e-50	6935000	6940000	0	130000	735	1
Bomo_Chr14	7037500	BmNPV	92500	8	0.000161941	0.0122869	7035000	7040000	90000	95000	8	1
Bomo_Chr14	7222500	BmNPV	77500	9	2.6311e-05	0.00226373	7220000	7225000	75000	80000	9	1
Bomo_Chr14	7232500	BmNPV	102500	9	2.6311e-05	0.00226373	7230000	7235000	100000	105000	9	1
Bomo_Chr14	8712500	BmNPV	82500	9	2.6311e-05	0.00226373	8710000	8715000	80000	85000	9	1
Bomo_Chr14	8807500	BmNPV	42500	8	0.000161941	0.0122869	8805000	8810000	40000	45000	8	1
Bomo_Chr14	8822500	BmNPV	102500	8	0.000161941	0.0122869	8820000	8825000	100000	105000	8	1
Bomo_Chr14	9302500	BmNPV	82500	8	0.000161941	0.0122869	9300000	9305000	80000	85000	8	1
Bomo_Chr14	9322500	BmNPV	32500	8	0.000161941	0.0122869	9320000	9325000	30000	35000	8	1
Bomo_Chr14	9527500	BmNPV	92500	9	2.6311e-05	0.00226373	9525000	9530000	90000	95000	9	1
Bomo_Chr14	9547500	BmNPV	87500	8	0.000161941	0.0122869	9545000	9550000	85000	90000	8	1
Bomo_Chr14	9817500	BmNPV	32500	10	3.86084e-06	0.000370259	9815000	9820000	30000	35000	10	1
Bomo_Chr14	9817500	BmNPV	42500	13	7.20433e-09	8.93195e-07	9815000	9820000	40000	45000	13	1
Bomo_Chr14	9817500	BmNPV	52500	9	2.6311e-05	0.00226373	9815000	9820000	50000	55000	9	1
Bomo_Chr14	9817500	BmNPV	122500	10	3.86084e-06	0.000370259	9815000	9820000	120000	125000	10	1
Bomo_Chr14	10487500	BmNPV	92500	64	2.18023e-79	8.61935e-77	10485000	10490000	0	130000	1123	1
Bomo_Chr14	10547500	BmNPV	122500	11	5.16374e-07	5.44926e-05	10545000	10550000	120000	130000	21	1
Bomo_Chr14	10567500	BmNPV	62500	8	0.000161941	0.0122869	10565000	10570000	60000	65000	8	1
Bomo_Chr14	10947500	BmNPV	122500	9	2.6311e-05	0.00226373	10945000	10950000	120000	125000	9	1
Bomo_Chr14	11032500	BmNPV	92500	8	0.000161941	0.0122869	11030000	11035000	90000	95000	8	1
Bomo_Chr14	11032500	BmNPV	102500	9	2.6311e-05	0.00226373	11030000	11035000	100000	105000	9	1
Bomo_Chr14	11067500	BmNPV	32500	8	0.000161941	0.0122869	11065000	11070000	30000	35000	8	1
Bomo_Chr14	11067500	BmNPV	122500	9	2.6311e-05	0.00226373	11065000	11070000	120000	125000	9	1
Bomo_Chr14	11562500	BmNPV	22500	8	0.000161941	0.0122869	11560000	11565000	20000	25000	8	1
Bomo_Chr14	12067500	BmNPV	92500	9	2.6311e-05	0.00226373	12065000	12070000	90000	95000	9	1
Bomo_Chr14	12462500	BmNPV	22500	8	0.000161941	0.0122869	12460000	12465000	20000	25000	8	1
Bomo_Chr14	12467500	BmNPV	2500	9	2.6311e-05	0.00226373	12465000	12470000	0	5000	9	1
Bomo_Chr14	12467500	BmNPV	92500	10	3.86084e-06	0.000370259	12465000	12470000	90000	95000	10	1
Bomo_Chr14	12467500	BmNPV	122500	9	2.6311e-05	0.00226373	12465000	12470000	120000	125000	9	1
Bomo_Chr15	122500	BmNPV	27500	8	0.000161941	0.0122869	120000	125000	25000	30000	8	1
Bomo_Chr15	172500	BmNPV	47500	8	0.000161941	0.0122869	170000	175000	45000	50000	8	1
Bomo_Chr15	172500	BmNPV	92500	8	0.000161941	0.0122869	170000	175000	90000	95000	8	1
Bomo_Chr15	207500	BmNPV	47500	8	0.000161941	0.0122869	205000	210000	45000	50000	8	1
Bomo_Chr15	367500	BmNPV	32500	11	5.16374e-07	5.44926e-05	365000	370000	20000	35000	32	1
Bomo_Chr15	367500	BmNPV	42500	10	3.86084e-06	0.000370259	365000	370000	40000	55000	28	1
Bomo_Chr15	367500	BmNPV	62500	9	2.6311e-05	0.00226373	365000	370000	60000	65000	9	1
Bomo_Chr15	367500	BmNPV	82500	14	7.60703e-10	1.01057e-07	365000	370000	80000	85000	14	1
Bomo_Chr15	367500	BmNPV	92500	10	3.86084e-06	0.000370259	365000	370000	90000	95000	10	1
Bomo_Chr15	367500	BmNPV	107500	11	5.16374e-07	5.44926e-05	365000	370000	100000	115000	27	1
Bomo_Chr15	367500	BmNPV	122500	12	6.34341e-08	7.28518e-06	365000	370000	120000	130000	23	1
Bomo_Chr15	547500	BmNPV	42500	54	2.23558e-63	8.29362e-61	545000	550000	0	130000	745	1
Bomo_Chr15	1632500	BmNPV	32500	9	2.6311e-05	0.00226373	1630000	1635000	30000	35000	9	1
Bomo_Chr15	1632500	BmNPV	82500	8	0.000161941	0.0122869	1630000	1635000	80000	85000	8	1
Bomo_Chr15	2262500	BmNPV	22500	8	0.000161941	0.0122869	2260000	2265000	20000	25000	8	1
Bomo_Chr15	2582500	BmNPV	107500	8	0.000161941	0.0122869	2580000	2585000	105000	110000	8	1
Bomo_Chr15	2707500	BmNPV	32500	8	0.000161941	0.0122869	2705000	2710000	30000	35000	8	1
Bomo_Chr15	3342500	BmNPV	7500	8	0.000161941	0.0122869	3340000	3345000	5000	10000	8	1
Bomo_Chr15	3342500	BmNPV	32500	9	2.6311e-05	0.00226373	3340000	3345000	30000	35000	9	1
Bomo_Chr15	3342500	BmNPV	47500	8	0.000161941	0.0122869	3340000	3345000	45000	50000	8	1
Bomo_Chr15	3342500	BmNPV	72500	9	2.6311e-05	0.00226373	3340000	3345000	70000	75000	9	1
Bomo_Chr15	3342500	BmNPV	82500	8	0.000161941	0.0122869	3340000	3345000	80000	85000	8	1
Bomo_Chr15	3342500	BmNPV	122500	8	0.000161941	0.0122869	3340000	3345000	120000	125000	8	1
Bomo_Chr15	3387500	BmNPV	82500	8	0.000161941	0.0122869	3385000	3390000	80000	85000	8	1
Bomo_Chr15	3402500	BmNPV	92500	10	3.86084e-06	0.000370259	3400000	3405000	90000	95000	10	1
Bomo_Chr15	3562500	BmNPV	82500	9	2.6311e-05	0.00226373	3560000	3565000	80000	85000	9	1
Bomo_Chr15	3997500	BmNPV	77500	8	0.000161941	0.0122869	3995000	4000000	75000	80000	8	1
Bomo_Chr15	3997500	BmNPV	112500	8	0.000161941	0.0122869	3995000	4000000	110000	115000	8	1
Bomo_Chr15	4382500	BmNPV	102500	8	0.000161941	0.0122869	4380000	4385000	100000	105000	8	1
Bomo_Chr15	5162500	BmNPV	7500	8	0.000161941	0.0122869	5160000	5165000	5000	10000	8	1
Bomo_Chr15	5162500	BmNPV	47500	8	0.000161941	0.0122869	5160000	5165000	45000	50000	8	1
Bomo_Chr15	5162500	BmNPV	72500	10	3.86084e-06	0.000370259	5160000	5165000	70000	75000	10	1
Bomo_Chr15	5497500	BmNPV	82500	104	2.23622e-149	9.49583e-147	5490000	5500000	0	130000	2738	1
Bomo_Chr15	5532500	BmNPV	82500	60	6.76062e-73	2.61759e-70	5530000	5545000	0	130000	2619	1
Bomo_Chr15	5567500	BmNPV	82500	71	5.28461e-91	2.1461e-88	5560000	5575000	0	130000	2575	1
Bomo_Chr15	5597500	BmNPV	42500	53	8.10776e-62	2.98203e-59	5595000	5600000	0	130000	845	1
Bomo_Chr15	5607500	BmNPV	127500	41	8.74266e-44	2.76809e-41	5605000	5610000	0	130000	605	1
Bomo_Chr15	5622500	BmNPV	42500	85	4.21573e-115	1.76304e-112	5620000	5640000	0	130000	4671	1
Bomo_Chr15	5647500	BmNPV	42500	41	8.74266e-44	2.76809e-41	5645000	5650000	0	130000	656	1
Bomo_Chr15	5737500	BmNPV	122500	33	1.40054e-32	3.77157e-30	5735000	5740000	0	130000	551	1
Bomo_Chr15	5767500	BmNPV	92500	86	7.30116e-117	3.05714e-114	5765000	5770000	0	130000	1364	1
Bomo_Chr15	5797500	BmNPV	92500	71	5.28461e-91	2.1461e-88	5775000	5810000	0	130000	5756	0.994505
Bomo_Chr15	5827500	BmNPV	82500	67	2.50519e-84	1.00355e-81	5825000	5835000	0	130000	2105	1
Bomo_Chr15	6237500	BmNPV	127500	9	2.6311e-05	0.00226373	6235000	6240000	125000	130000	9	1
Bomo_Chr15	6452500	BmNPV	2500	8	0.000161941	0.0122869	6450000	6455000	0	5000	8	1
Bomo_Chr15	6452500	BmNPV	32500	8	0.000161941	0.0122869	6450000	6455000	30000	40000	16	1
Bomo_Chr15	6452500	BmNPV	47500	8	0.000161941	0.0122869	6450000	6455000	45000	50000	8	1
Bomo_Chr15	6452500	BmNPV	62500	9	2.6311e-05	0.00226373	6450000	6455000	60000	65000	9	1
Bomo_Chr15	6452500	BmNPV	82500	9	2.6311e-05	0.00226373	6450000	6455000	80000	85000	9	1
Bomo_Chr15	6452500	BmNPV	92500	13	7.20433e-09	8.93195e-07	6450000	6455000	90000	95000	13	1
Bomo_Chr15	6452500	BmNPV	127500	8	0.000161941	0.0122869	6450000	6455000	125000	130000	8	1
Bomo_Chr15	6527500	BmNPV	107500	9	2.6311e-05	0.00226373	6525000	6530000	105000	110000	9	1
Bomo_Chr15	7452500	BmNPV	82500	8	0.000161941	0.0122869	7450000	7455000	80000	85000	8	1
Bomo_Chr15	9342500	BmNPV	127500	45	1.20034e-49	4.03745e-47	9340000	9345000	0	130000	767	1
Bomo_Chr15	9497500	BmNPV	122500	97	1.47188e-136	6.2247e-134	9495000	9500000	0	130000	1465	1
Bomo_Chr15	9512500	BmNPV	122500	49	1.15952e-55	4.09994e-53	9510000	9515000	0	130000	792	1
Bomo_Chr15	9562500	BmNPV	122500	41	8.74266e-44	2.76809e-41	9560000	9565000	0	130000	689	1
Bomo_Chr15	9572500	BmNPV	97500	42	3.09835e-45	9.96948e-43	9570000	9575000	0	130000	744	1
Bomo_Chr15	9622500	BmNPV	122500	40	2.40829e-42	7.49264e-40	9620000	9625000	0	130000	682	1
Bomo_Chr15	9637500	BmNPV	82500	54	2.23558e-63	8.29362e-61	9635000	9640000	0	130000	919	1
Bomo_Chr15	9647500	BmNPV	82500	48	3.81628e-54	1.33413e-51	9645000	9650000	0	130000	843	1
Bomo_Chr15	9672500	BmNPV	42500	54	2.23558e-63	8.29362e-61	9670000	9675000	0	130000	917	1
Bomo_Chr15	9682500	BmNPV	92500	61	1.65039e-74	6.42535e-72	9680000	9685000	0	130000	949	1
Bomo_Chr15	9742500	BmNPV	42500	49	1.15952e-55	4.09994e-53	9740000	9750000	0	130000	1214	1
Bomo_Chr15	9852500	BmNPV	82500	45	1.20034e-49	4.03745e-47	9850000	9855000	0	130000	760	1
Bomo_Chr15	9872500	BmNPV	77500	54	2.23558e-63	8.29362e-61	9870000	9875000	0	130000	826	1
Bomo_Chr15	10727500	BmNPV	47500	9	2.6311e-05	0.00226373	10725000	10730000	45000	50000	9	1
Bomo_Chr15	10907500	BmNPV	32500	25	3.27804e-22	7.09219e-20	10905000	10910000	0	70000	224	1
Bomo_Chr15	10907500	BmNPV	112500	22	1.37912e-18	2.69605e-16	10905000	10910000	75000	130000	162	1
Bomo_Chr15	11297500	BmNPV	42500	33	1.40054e-32	3.77157e-30	11295000	11300000	0	55000	180	1
Bomo_Chr15	11297500	BmNPV	122500	30	1.39291e-28	3.48312e-26	11295000	11300000	60000	130000	262	1
Bomo_Chr15	11537500	BmNPV	82500	38	1.69613e-39	5.08407e-37	11535000	11540000	0	130000	682	1
Bomo_Chr15	12282500	BmNPV	42500	8	0.000161941	0.0122869	12280000	12285000	40000	45000	8	1
Bomo_Chr15	12282500	BmNPV	92500	8	0.000161941	0.0122869	12280000	12285000	90000	95000	8	1
Bomo_Chr15	13672500	BmNPV	92500	10	3.86084e-06	0.000370259	13670000	13675000	90000	100000	19	1
Bomo_Chr15	13832500	BmNPV	42500	10	3.86084e-06	0.000370259	13830000	13835000	40000	45000	10	1
Bomo_Chr15	13862500	BmNPV	122500	8	0.000161941	0.0122869	13860000	13865000	120000	125000	8	1
Bomo_Chr15	14002500	BmNPV	32500	8	0.000161941	0.0122869	14000000	14005000	30000	35000	8	1
Bomo_Chr15	14002500	BmNPV	77500	8	0.000161941	0.0122869	14000000	14005000	75000	80000	8	1
Bomo_Chr15	14017500	BmNPV	112500	9	2.6311e-05	0.00226373	14015000	14020000	110000	115000	9	1
Bomo_Chr15	14377500	BmNPV	2500	9	2.6311e-05	0.00226373	14375000	14380000	0	5000	9	1
Bomo_Chr15	14377500	BmNPV	12500	9	2.6311e-05	0.00226373	14375000	14380000	10000	15000	9	1
Bomo_Chr15	14377500	BmNPV	42500	11	5.16374e-07	5.44926e-05	14375000	14380000	40000	45000	11	1
Bomo_Chr15	14377500	BmNPV	62500	10	3.86084e-06	0.000370259	14375000	14380000	60000	65000	10	1
Bomo_Chr15	14377500	BmNPV	102500	10	3.86084e-06	0.000370259	14375000	14380000	100000	105000	10	1
Bomo_Chr15	14657500	BmNPV	32500	8	0.000161941	0.0122869	14655000	14660000	30000	35000	8	1
Bomo_Chr15	14737500	BmNPV	42500	10	3.86084e-06	0.000370259	14735000	14740000	40000	45000	10	1
Bomo_Chr15	14797500	BmNPV	117500	10	3.86084e-06	0.000370259	14795000	14800000	115000	120000	10	1
Bomo_Chr15	14797500	BmNPV	127500	9	2.6311e-05	0.00226373	14795000	14800000	125000	130000	9	1
Bomo_Chr15	14997500	BmNPV	92500	9	2.6311e-05	0.00226373	14995000	15000000	90000	95000	9	1
Bomo_Chr15	15352500	BmNPV	32500	8	0.000161941	0.0122869	15350000	15355000	30000	35000	8	1
Bomo_Chr15	15352500	BmNPV	42500	10	3.86084e-06	0.000370259	15350000	15355000	40000	45000	10	1
Bomo_Chr15	15462500	BmNPV	62500	8	0.000161941	0.0122869	15460000	15465000	60000	65000	8	1
Bomo_Chr15	15607500	BmNPV	42500	8	0.000161941	0.0122869	15605000	15610000	40000	45000	8	1
Bomo_Chr15	15607500	BmNPV	97500	8	0.000161941	0.0122869	15605000	15610000	95000	100000	8	1
Bomo_Chr15	16177500	BmNPV	92500	8	0.000161941	0.0122869	16175000	16180000	90000	95000	8	1
Bomo_Chr15	16567500	BmNPV	112500	8	0.000161941	0.0122869	16565000	16570000	110000	115000	8	1
Bomo_Chr15	16752500	BmNPV	127500	8	0.000161941	0.0122869	16750000	16755000	125000	130000	8	1
Bomo_Chr15	16767500	BmNPV	7500	8	0.000161941	0.0122869	16765000	16770000	5000	10000	8	1
Bomo_Chr15	17467500	BmNPV	112500	8	0.000161941	0.0122869	17465000	17470000	110000	115000	8	1
Bomo_Chr15	17612500	BmNPV	112500	9	2.6311e-05	0.00226373	17610000	17615000	110000	115000	9	1
Bomo_Chr16	157500	BmNPV	82500	8	0.000161941	0.0122869	155000	160000	80000	85000	8	1
Bomo_Chr16	397500	BmNPV	122500	10	3.86084e-06	0.000370259	395000	400000	120000	125000	10	1
Bomo_Chr16	612500	BmNPV	112500	8	0.000161941	0.0122869	610000	615000	110000	115000	8	1
Bomo_Chr16	782500	BmNPV	122500	8	0.000161941	0.0122869	780000	785000	120000	125000	8	1
Bomo_Chr16	957500	BmNPV	52500	8	0.000161941	0.0122869	955000	960000	50000	55000	8	1
Bomo_Chr16	957500	BmNPV	122500	9	2.6311e-05	0.00226373	955000	960000	120000	125000	9	1
Bomo_Chr16	1022500	BmNPV	92500	12	6.34341e-08	7.28518e-06	1020000	1025000	90000	95000	12	1
Bomo_Chr16	1022500	BmNPV	112500	8	0.000161941	0.0122869	1020000	1025000	110000	115000	8	1
Bomo_Chr16	1037500	BmNPV	12500	9	2.6311e-05	0.00226373	1035000	1040000	10000	15000	9	1
Bomo_Chr16	1037500	BmNPV	47500	8	0.000161941	0.0122869	1035000	1040000	45000	50000	8	1
Bomo_Chr16	1037500	BmNPV	62500	8	0.000161941	0.0122869	1035000	1040000	60000	65000	8	1
Bomo_Chr16	1037500	BmNPV	117500	9	2.6311e-05	0.00226373	1035000	1040000	115000	125000	17	1
Bomo_Chr16	1052500	BmNPV	62500	8	0.000161941	0.0122869	1050000	1055000	60000	65000	8	1
Bomo_Chr16	1052500	BmNPV	77500	9	2.6311e-05	0.00226373	1050000	1055000	75000	80000	9	1
Bomo_Chr16	1372500	BmNPV	82500	8	0.000161941	0.0122869	1370000	1375000	80000	85000	8	1
Bomo_Chr16	1452500	BmNPV	82500	8	0.000161941	0.0122869	1450000	1455000	80000	85000	8	1
Bomo_Chr16	1457500	BmNPV	47500	8	0.000161941	0.0122869	1455000	1460000	45000	50000	8	1
Bomo_Chr16	1582500	BmNPV	2500	9	2.6311e-05	0.00226373	1580000	1585000	0	5000	9	1
Bomo_Chr16	1652500	BmNPV	77500	9	2.6311e-05	0.00226373	1650000	1655000	75000	80000	9	1
Bomo_Chr16	1652500	BmNPV	97500	8	0.000161941	0.0122869	1650000	1655000	95000	100000	8	1
Bomo_Chr16	2057500	BmNPV	77500	9	2.6311e-05	0.00226373	2055000	2060000	75000	80000	9	1
Bomo_Chr16	2132500	BmNPV	102500	51	1.00795e-58	3.64036e-56	2130000	2135000	0	130000	830	1
Bomo_Chr16	2357500	BmNPV	62500	8	0.000161941	0.0122869	2355000	2360000	60000	70000	16	1
Bomo_Chr16	2502500	BmNPV	47500	9	2.6311e-05	0.00226373	2500000	2505000	45000	50000	9	1
Bomo_Chr16	2542500	BmNPV	92500	14	7.60703e-10	1.01057e-07	2540000	2545000	90000	95000	14	1
Bomo_Chr16	2722500	BmNPV	2500	8	0.000161941	0.0122869	2720000	2725000	0	5000	8	1
Bomo_Chr16	2722500	BmNPV	42500	9	2.6311e-05	0.00226373	2720000	2725000	40000	45000	9	1
Bomo_Chr16	2722500	BmNPV	52500	9	2.6311e-05	0.00226373	2720000	2725000	50000	55000	9	1
Bomo_Chr16	2722500	BmNPV	97500	11	5.16374e-07	5.44926e-05	2720000	2725000	90000	100000	21	1
Bomo_Chr16	2722500	BmNPV	122500	10	3.86084e-06	0.000370259	2720000	2725000	120000	125000	10	1
Bomo_Chr16	2757500	BmNPV	2500	9	2.6311e-05	0.00226373	2755000	2760000	0	5000	9	1
Bomo_Chr16	3207500	BmNPV	122500	8	0.000161941	0.0122869	3205000	3210000	120000	125000	8	1
Bomo_Chr16	4147500	BmNPV	92500	9	2.6311e-05	0.00226373	4145000	4150000	90000	95000	9	1
Bomo_Chr16	4447500	BmNPV	122500	9	2.6311e-05	0.00226373	4445000	4450000	120000	125000	9	1
Bomo_Chr16	4927500	BmNPV	122500	9	2.6311e-05	0.00226373	4925000	4930000	120000	125000	9	1
Bomo_Chr16	5042500	BmNPV	122500	9	2.6311e-05	0.00226373	5040000	5045000	120000	125000	9	1
Bomo_Chr16	5227500	BmNPV	107500	8	0.000161941	0.0122869	5225000	5230000	100000	115000	24	1
Bomo_Chr16	6262500	BmNPV	12500	8	0.000161941	0.0122869	6260000	6265000	10000	15000	8	1
Bomo_Chr16	6752500	BmNPV	42500	9	2.6311e-05	0.00226373	6750000	6755000	40000	45000	9	1
Bomo_Chr16	6817500	BmNPV	42500	8	0.000161941	0.0122869	6815000	6820000	40000	45000	8	1
Bomo_Chr16	6922500	BmNPV	42500	9	2.6311e-05	0.00226373	6920000	6925000	40000	45000	9	1
Bomo_Chr16	8902500	BmNPV	22500	8	0.000161941	0.0122869	8900000	8905000	20000	25000	8	1
Bomo_Chr16	8947500	BmNPV	92500	8	0.000161941	0.0122869	8945000	8950000	90000	95000	8	1
Bomo_Chr16	9172500	BmNPV	127500	8	0.000161941	0.0122869	9170000	9175000	125000	130000	8	1
Bomo_Chr16	9447500	BmNPV	62500	8	0.000161941	0.0122869	9445000	9450000	60000	65000	8	1
Bomo_Chr16	9512500	BmNPV	27500	14	7.60703e-10	1.01057e-07	9510000	9515000	20000	35000	37	1
Bomo_Chr16	9512500	BmNPV	42500	14	7.60703e-10	1.01057e-07	9510000	9515000	40000	45000	14	1
Bomo_Chr16	9512500	BmNPV	52500	10	3.86084e-06	0.000370259	9510000	9515000	50000	55000	10	1
Bomo_Chr16	9512500	BmNPV	62500	10	3.86084e-06	0.000370259	9510000	9515000	60000	70000	18	1
Bomo_Chr16	9512500	BmNPV	92500	17	6.05488e-13	9.56178e-11	9510000	9515000	75000	130000	130	1
Bomo_Chr16	9612500	BmNPV	127500	41	8.74266e-44	2.76809e-41	9610000	9615000	0	130000	731	1
Bomo_Chr16	9622500	BmNPV	122500	50	3.45266e-57	1.23438e-54	9620000	9630000	0	130000	1622	1
Bomo_Chr16	9642500	BmNPV	77500	66	1.12708e-82	4.49776e-80	9640000	9650000	0	130000	2041	1
Bomo_Chr16	9657500	BmNPV	77500	58	1.07931e-69	4.12704e-67	9655000	9660000	0	130000	1038	1
Bomo_Chr16	9667500	BmNPV	62500	53	8.10776e-62	2.98203e-59	9665000	9675000	0	130000	1868	1
Bomo_Chr16	9697500	BmNPV	82500	47	1.23043e-52	4.24846e-50	9695000	9705000	0	130000	1446	1
Bomo_Chr16	9712500	BmNPV	42500	60	6.76062e-73	2.61759e-70	9710000	9715000	0	130000	831	1
Bomo_Chr16	9782500	BmNPV	92500	8	0.000161941	0.0122869	9780000	9785000	90000	95000	8	1
Bomo_Chr16	9932500	BmNPV	62500	8	0.000161941	0.0122869	9930000	9935000	60000	65000	8	1
Bomo_Chr16	9932500	BmNPV	82500	8	0.000161941	0.0122869	9930000	9935000	80000	85000	8	1
Bomo_Chr16	10347500	BmNPV	42500	11	5.16374e-07	5.44926e-05	10345000	10350000	40000	45000	11	1
Bomo_Chr16	10347500	BmNPV	77500	11	5.16374e-07	5.44926e-05	10345000	10350000	75000	80000	11	1
Bomo_Chr16	10992500	BmNPV	32500	28	5.47941e-26	1.29754e-23	10990000	10995000	0	35000	132	1
Bomo_Chr16	10992500	BmNPV	82500	34	6.12853e-34	1.68891e-31	10990000	10995000	40000	130000	422	1
Bomo_Chr16	11007500	BmNPV	92500	48	3.81628e-54	1.33413e-51	11005000	11010000	0	130000	773	1
Bomo_Chr16	11072500	BmNPV	92500	57	4.20397e-68	1.59708e-65	11070000	11075000	0	130000	837	1
Bomo_Chr16	11122500	BmNPV	92500	61	1.65039e-74	6.42535e-72	11120000	11125000	0	130000	1131	1
Bomo_Chr16	11197500	BmNPV	92500	46	3.88458e-51	1.32434e-48	11195000	11200000	0	130000	706	1
Bomo_Chr16	11367500	BmNPV	47500	9	2.6311e-05	0.00226373	11365000	11370000	45000	50000	9	1
Bomo_Chr16	11972500	BmNPV	27500	8	0.000161941	0.0122869	11970000	11975000	25000	30000	8	1
Bomo_Chr16	11972500	BmNPV	82500	9	2.6311e-05	0.00226373	11970000	11975000	80000	85000	9	1
Bomo_Chr16	12012500	BmNPV	22500	8	0.000161941	0.0122869	12010000	12015000	20000	25000	8	1
Bomo_Chr16	12297500	BmNPV	12500	8	0.000161941	0.0122869	12295000	12300000	10000	15000	8	1
Bomo_Chr16	13057500	BmNPV	77500	8	0.000161941	0.0122869	13055000	13060000	75000	80000	8	1
Bomo_Chr16	13397500	BmNPV	47500	8	0.000161941	0.0122869	13395000	13400000	45000	50000	8	1
Bomo_Chr16	13667500	BmNPV	117500	8	0.000161941	0.0122869	13665000	13670000	115000	120000	8	1
Bomo_Chr16	13692500	BmNPV	127500	8	0.000161941	0.0122869	13690000	13695000	125000	130000	8	1
Bomo_Chr16	13922500	BmNPV	92500	9	2.6311e-05	0.00226373	13920000	13925000	90000	95000	9	1
Bomo_Chr16	14017500	BmNPV	77500	8	0.000161941	0.0122869	14015000	14020000	75000	80000	8	1
Bomo_Chr16	14037500	BmNPV	82500	9	2.6311e-05	0.00226373	14030000	14040000	80000	85000	18	1
Bomo_Chr16	14037500	BmNPV	122500	8	0.000161941	0.0122869	14035000	14040000	120000	130000	16	1
Bomo_Chr16	14232500	BmNPV	92500	9	2.6311e-05	0.00226373	14230000	14235000	90000	95000	9	1
Bomo_Chr17	52500	BmNPV	82500	8	0.000161941	0.0122869	50000	55000	80000	85000	8	1
Bomo_Chr17	52500	BmNPV	112500	8	0.000161941	0.0122869	50000	55000	110000	115000	8	1
Bomo_Chr17	672500	BmNPV	27500	14	7.60703e-10	1.01057e-07	670000	675000	20000	30000	23	1
Bomo_Chr17	672500	BmNPV	52500	10	3.86084e-06	0.000370259	670000	675000	45000	55000	18	1
Bomo_Chr17	672500	BmNPV	62500	12	6.34341e-08	7.28518e-06	670000	675000	60000	65000	12	1
Bomo_Chr17	672500	BmNPV	77500	12	6.34341e-08	7.28518e-06	670000	675000	70000	85000	32	1
Bomo_Chr17	672500	BmNPV	102500	14	7.60703e-10	1.01057e-07	670000	675000	90000	105000	33	1
Bomo_Chr17	672500	BmNPV	112500	15	7.50423e-11	1.06161e-08	670000	675000	110000	115000	15	1
Bomo_Chr17	672500	BmNPV	122500	19	3.89442e-15	6.7524e-13	670000	675000	120000	130000	31	1
Bomo_Chr17	977500	BmNPV	122500	8	0.000161941	0.0122869	975000	980000	120000	125000	8	1
Bomo_Chr17	1132500	BmNPV	7500	8	0.000161941	0.0122869	1130000	1135000	5000	10000	8	1
Bomo_Chr17	1137500	BmNPV	97500	8	0.000161941	0.0122869	1135000	1140000	95000	100000	8	1
Bomo_Chr17	1137500	BmNPV	122500	11	5.16374e-07	5.44926e-05	1135000	1140000	120000	125000	11	1
Bomo_Chr17	1987500	BmNPV	77500	11	5.16374e-07	5.44926e-05	1985000	1990000	75000	80000	11	1
Bomo_Chr17	2372500	BmNPV	117500	9	2.6311e-05	0.00226373	2370000	2375000	115000	120000	9	1
Bomo_Chr17	2467500	BmNPV	77500	8	0.000161941	0.0122869	2465000	2470000	75000	80000	8	1
Bomo_Chr17	2467500	BmNPV	92500	12	6.34341e-08	7.28518e-06	2465000	2470000	90000	95000	12	1
Bomo_Chr17	2467500	BmNPV	122500	11	5.16374e-07	5.44926e-05	2465000	2470000	120000	130000	20	1
Bomo_Chr17	2917500	BmNPV	42500	39	6.47249e-41	1.97736e-38	2915000	2920000	0	130000	678	1
Bomo_Chr17	2977500	BmNPV	62500	52	2.88604e-60	1.05177e-57	2975000	2980000	0	130000	880	1
Bomo_Chr17	3022500	BmNPV	102500	59	2.72403e-71	1.04835e-68	3020000	3025000	0	130000	1001	1
Bomo_Chr17	3352500	BmNPV	92500	54	2.23558e-63	8.29362e-61	3350000	3355000	0	130000	845	1
Bomo_Chr17	3432500	BmNPV	77500	49	1.15952e-55	4.09994e-53	3430000	3435000	0	130000	835	1
Bomo_Chr17	3447500	BmNPV	77500	70	2.51938e-89	1.0198e-86	3445000	3455000	0	130000	2050	1
Bomo_Chr17	3522500	BmNPV	82500	111	2.12531e-162	9.04674e-160	3520000	3525000	0	130000	1733	1
Bomo_Chr17	3532500	BmNPV	42500	49	1.15952e-55	4.09994e-53	3530000	3535000	0	130000	792	1
Bomo_Chr17	3637500	BmNPV	122500	59	2.72403e-71	1.04835e-68	3635000	3640000	0	130000	790	1
Bomo_Chr17	3767500	BmNPV	42500	43	1.07255e-46	3.50685e-44	3765000	3770000	0	130000	700	1
Bomo_Chr17	4447500	BmNPV	112500	11	5.16374e-07	5.44926e-05	4445000	4450000	105000	115000	19	1
Bomo_Chr17	4447500	BmNPV	127500	8	0.000161941	0.0122869	4445000	4450000	125000	130000	8	1
Bomo_Chr17	4617500	BmNPV	42500	9	2.6311e-05	0.00226373	4615000	4620000	40000	45000	9	1
Bomo_Chr17	4877500	BmNPV	102500	8	0.000161941	0.0122869	4875000	4880000	100000	105000	8	1
Bomo_Chr17	5327500	BmNPV	82500	12	6.34341e-08	7.28518e-06	5325000	5330000	80000	85000	12	1
Bomo_Chr17	5327500	BmNPV	112500	8	0.000161941	0.0122869	5325000	5335000	110000	115000	16	1
Bomo_Chr17	5332500	BmNPV	32500	9	2.6311e-05	0.00226373	5330000	5335000	30000	35000	9	1
Bomo_Chr17	5482500	BmNPV	7500	9	2.6311e-05	0.00226373	5480000	5485000	5000	10000	9	1
Bomo_Chr17	5482500	BmNPV	47500	9	2.6311e-05	0.00226373	5480000	5485000	45000	50000	9	1
Bomo_Chr17	5772500	BmNPV	122500	10	3.86084e-06	0.000370259	5770000	5775000	120000	125000	10	1
Bomo_Chr17	5967500	BmNPV	42500	8	0.000161941	0.0122869	5965000	5970000	40000	45000	8	1
Bomo_Chr17	6157500	BmNPV	27500	8	0.000161941	0.0122869	6155000	6160000	25000	30000	8	1
Bomo_Chr17	6167500	BmNPV	47500	8	0.000161941	0.0122869	6165000	6170000	45000	50000	8	1
Bomo_Chr17	6602500	BmNPV	27500	28	5.47941e-26	1.29754e-23	6600000	6605000	0	35000	121	1
Bomo_Chr17	6602500	BmNPV	42500	28	5.47941e-26	1.29754e-23	6600000	6605000	40000	55000	66	1
Bomo_Chr17	6602500	BmNPV	122500	37	4.331e-38	1.27326e-35	6600000	6605000	60000	130000	276	1
Bomo_Chr17	7092500	BmNPV	27500	8	0.000161941	0.0122869	7090000	7095000	25000	30000	8	1
Bomo_Chr17	7172500	BmNPV	42500	8	0.000161941	0.0122869	7170000	7175000	40000	45000	8	1
Bomo_Chr17	8177500	BmNPV	122500	8	0.000161941	0.0122869	8175000	8180000	120000	125000	8	1
Bomo_Chr17	8357500	BmNPV	62500	8	0.000161941	0.0122869	8355000	8360000	60000	65000	8	1
Bomo_Chr17	9057500	BmNPV	122500	8	0.000161941	0.0122869	9055000	9060000	120000	125000	8	1
Bomo_Chr17	10212500	BmNPV	22500	8	0.000161941	0.0122869	10210000	10215000	20000	25000	8	1
Bomo_Chr17	10212500	BmNPV	62500	9	2.6311e-05	0.00226373	10210000	10215000	60000	65000	9	1
Bomo_Chr17	10462500	BmNPV	27500	8	0.000161941	0.0122869	10460000	10465000	25000	30000	8	1
Bomo_Chr17	10487500	BmNPV	52500	8	0.000161941	0.0122869	10485000	10490000	50000	55000	8	1
Bomo_Chr17	10487500	BmNPV	62500	9	2.6311e-05	0.00226373	10485000	10490000	60000	65000	9	1
Bomo_Chr17	10487500	BmNPV	77500	13	7.20433e-09	8.93195e-07	10485000	10490000	75000	80000	13	1
Bomo_Chr17	10632500	BmNPV	92500	11	5.16374e-07	5.44926e-05	10630000	10635000	90000	95000	11	1
Bomo_Chr17	10712500	BmNPV	72500	8	0.000161941	0.0122869	10710000	10715000	70000	75000	8	1
Bomo_Chr17	10712500	BmNPV	92500	10	3.86084e-06	0.000370259	10710000	10715000	90000	95000	10	1
Bomo_Chr17	10712500	BmNPV	107500	8	0.000161941	0.0122869	10710000	10715000	105000	115000	16	1
Bomo_Chr17	11117500	BmNPV	122500	47	1.23043e-52	4.24846e-50	11115000	11120000	0	130000	684	1
Bomo_Chr17	11557500	BmNPV	122500	9	2.6311e-05	0.00226373	11555000	11560000	120000	125000	9	1
Bomo_Chr17	11842500	BmNPV	62500	41	8.74266e-44	2.76809e-41	11840000	11850000	0	130000	1346	0.980769
Bomo_Chr17	11872500	BmNPV	82500	54	2.23558e-63	8.29362e-61	11870000	11875000	0	130000	873	1
Bomo_Chr17	11902500	BmNPV	127500	30	1.39291e-28	3.48312e-26	11900000	11905000	0	130000	508	1
Bomo_Chr17	11912500	BmNPV	92500	43	1.07255e-46	3.50685e-44	11910000	11915000	0	130000	723	1
Bomo_Chr17	11982500	BmNPV	92500	53	8.10776e-62	2.98203e-59	11980000	11985000	0	130000	809	1
Bomo_Chr17	11992500	BmNPV	92500	74	4.48826e-96	1.83881e-93	11990000	11995000	0	130000	1282	1
Bomo_Chr17	12002500	BmNPV	82500	60	6.76062e-73	2.61759e-70	12000000	12005000	0	130000	898	1
Bomo_Chr17	12012500	BmNPV	92500	8	0.000161941	0.0122869	12010000	12015000	90000	95000	8	1
Bomo_Chr17	12012500	BmNPV	127500	8	0.000161941	0.0122869	12010000	12015000	125000	130000	8	1
Bomo_Chr17	12022500	BmNPV	122500	101	7.39351e-144	3.13348e-141	12020000	12025000	0	130000	1545	1
Bomo_Chr17	12217500	BmNPV	2500	9	2.6311e-05	0.00226373	12215000	12220000	0	5000	9	1
Bomo_Chr17	12217500	BmNPV	12500	10	3.86084e-06	0.000370259	12215000	12220000	10000	15000	10	1
Bomo_Chr17	12217500	BmNPV	32500	15	7.50423e-11	1.06161e-08	12215000	12220000	20000	35000	37	1
Bomo_Chr17	12217500	BmNPV	52500	12	6.34341e-08	7.28518e-06	12215000	12220000	45000	55000	20	1
Bomo_Chr17	12217500	BmNPV	82500	13	7.20433e-09	8.93195e-07	12215000	12220000	70000	85000	30	1
Bomo_Chr17	12217500	BmNPV	92500	10	3.86084e-06	0.000370259	12215000	12220000	90000	95000	10	1
Bomo_Chr17	12217500	BmNPV	102500	9	2.6311e-05	0.00226373	12215000	12220000	100000	105000	9	1
Bomo_Chr17	12217500	BmNPV	122500	15	7.50423e-11	1.06161e-08	12215000	12220000	110000	130000	43	1
Bomo_Chr17	12467500	BmNPV	2500	27	1.03186e-24	2.3743e-22	12465000	12470000	0	15000	64	1
Bomo_Chr17	12467500	BmNPV	42500	51	1.00795e-58	3.64036e-56	12465000	12470000	20000	130000	767	1
Bomo_Chr17	12832500	BmNPV	92500	8	0.000161941	0.0122869	12830000	12835000	90000	95000	8	1
Bomo_Chr17	12832500	BmNPV	112500	10	3.86084e-06	0.000370259	12830000	12835000	110000	115000	10	1
Bomo_Chr17	13047500	BmNPV	122500	68	5.48653e-86	2.2059e-83	13035000	13050000	0	130000	3090	1
Bomo_Chr17	13252500	BmNPV	92500	73	2.23009e-94	9.112e-92	13250000	13255000	0	130000	1020	1
Bomo_Chr17	13377500	BmNPV	127500	53	8.10776e-62	2.98203e-59	13375000	13380000	0	130000	853	1
Bomo_Chr17	13402500	BmNPV	92500	61	1.65039e-74	6.42535e-72	13400000	13405000	0	130000	881	1
Bomo_Chr17	13417500	BmNPV	122500	46	3.88458e-51	1.32434e-48	13415000	13420000	0	130000	727	1
Bomo_Chr17	13432500	BmNPV	62500	62	3.964e-76	1.55196e-73	13430000	13435000	0	130000	957	1
Bomo_Chr17	13832500	BmNPV	107500	9	2.6311e-05	0.00226373	13830000	13835000	105000	110000	9	1
Bomo_Chr17	13912500	BmNPV	122500	8	0.000161941	0.0122869	13910000	13915000	120000	125000	8	1
Bomo_Chr17	14072500	BmNPV	127500	9	2.6311e-05	0.00226373	14070000	14075000	125000	130000	9	1
Bomo_Chr17	14322500	BmNPV	47500	11	5.16374e-07	5.44926e-05	14320000	14325000	45000	50000	11	1
Bomo_Chr17	14912500	BmNPV	122500	8	0.000161941	0.0122869	14910000	14915000	120000	125000	8	1
Bomo_Chr17	15047500	BmNPV	127500	8	0.000161941	0.0122869	15045000	15050000	125000	130000	8	1
Bomo_Chr17	15182500	BmNPV	122500	200	0	0	15180000	15185000	0	130000	3756	1
Bomo_Chr17	15262500	BmNPV	42500	8	0.000161941	0.0122869	15260000	15265000	40000	45000	8	1
Bomo_Chr17	15512500	BmNPV	92500	12	6.34341e-08	7.28518e-06	15510000	15515000	90000	95000	12	1
Bomo_Chr17	15987500	BmNPV	92500	8	0.000161941	0.0122869	15985000	15990000	90000	95000	8	1
Bomo_Chr17	16102500	BmNPV	77500	9	2.6311e-05	0.00226373	16100000	16105000	75000	80000	9	1
Bomo_Chr17	16287500	BmNPV	47500	10	3.86084e-06	0.000370259	16285000	16290000	45000	50000	10	1
Bomo_Chr17	16342500	BmNPV	97500	9	2.6311e-05	0.00226373	16340000	16345000	95000	100000	9	1
Bomo_Chr17	16387500	BmNPV	122500	48	3.81628e-54	1.33413e-51	16385000	16390000	0	130000	731	1
Bomo_Chr17	16792500	BmNPV	92500	9	2.6311e-05	0.00226373	16790000	16795000	90000	95000	9	1
Bomo_Chr18	392500	BmNPV	122500	8	0.000161941	0.0122869	390000	395000	120000	125000	8	1
Bomo_Chr18	642500	BmNPV	62500	8	0.000161941	0.0122869	640000	645000	60000	65000	8	1
Bomo_Chr18	702500	BmNPV	92500	8	0.000161941	0.0122869	700000	705000	90000	95000	8	1
Bomo_Chr18	787500	BmNPV	47500	8	0.000161941	0.0122869	785000	790000	45000	50000	8	1
Bomo_Chr18	787500	BmNPV	77500	9	2.6311e-05	0.00226373	785000	790000	75000	80000	9	1
Bomo_Chr18	1142500	BmNPV	92500	9	2.6311e-05	0.00226373	1140000	1145000	90000	95000	9	1
Bomo_Chr18	1172500	BmNPV	47500	9	2.6311e-05	0.00226373	1170000	1175000	45000	50000	9	1
Bomo_Chr18	1172500	BmNPV	97500	9	2.6311e-05	0.00226373	1170000	1175000	95000	100000	9	1
Bomo_Chr18	1512500	BmNPV	47500	8	0.000161941	0.0122869	1510000	1515000	45000	50000	8	1
Bomo_Chr18	1512500	BmNPV	62500	9	2.6311e-05	0.00226373	1510000	1515000	60000	65000	9	1
Bomo_Chr18	1782500	BmNPV	122500	40	2.40829e-42	7.49264e-40	1780000	1785000	0	130000	635	1
Bomo_Chr18	1812500	BmNPV	42500	47	1.23043e-52	4.24846e-50	1795000	1815000	0	130000	2691	0.990385
Bomo_Chr18	1827500	BmNPV	42500	49	1.15952e-55	4.09994e-53	1825000	1830000	0	130000	733	1
Bomo_Chr18	1877500	BmNPV	42500	49	1.15952e-55	4.09994e-53	1875000	1880000	0	130000	854	1
Bomo_Chr18	2277500	BmNPV	77500	9	2.6311e-05	0.00226373	2275000	2280000	75000	80000	9	1
Bomo_Chr18	2307500	BmNPV	102500	9	2.6311e-05	0.00226373	2305000	2310000	100000	105000	9	1
Bomo_Chr18	2557500	BmNPV	42500	8	0.000161941	0.0122869	2555000	2560000	40000	45000	8	1
Bomo_Chr18	2557500	BmNPV	127500	9	2.6311e-05	0.00226373	2555000	2560000	125000	130000	9	1
Bomo_Chr18	2572500	BmNPV	57500	8	0.000161941	0.0122869	2570000	2575000	55000	60000	8	1
Bomo_Chr18	2572500	BmNPV	77500	9	2.6311e-05	0.00226373	2570000	2575000	75000	80000	9	1
Bomo_Chr18	2572500	BmNPV	97500	11	5.16374e-07	5.44926e-05	2570000	2575000	95000	100000	11	1
Bomo_Chr18	2772500	BmNPV	62500	9	2.6311e-05	0.00226373	2770000	2775000	60000	65000	9	1
Bomo_Chr18	3187500	BmNPV	92500	8	0.000161941	0.0122869	3185000	3190000	90000	95000	8	1
Bomo_Chr18	3237500	BmNPV	2500	23	8.90719e-20	1.80413e-17	3235000	3240000	0	15000	57	1
Bomo_Chr18	3237500	BmNPV	92500	30	1.39291e-28	3.48312e-26	3235000	3240000	20000	130000	504	1
Bomo_Chr18	3247500	BmNPV	82500	38	1.69613e-39	5.08407e-37	3245000	3250000	0	130000	583	1
Bomo_Chr18	3277500	BmNPV	32500	8	0.000161941	0.0122869	3275000	3280000	30000	35000	8	1
Bomo_Chr18	4217500	BmNPV	122500	58	1.07931e-69	4.12704e-67	4215000	4220000	0	130000	885	1
Bomo_Chr18	4232500	BmNPV	122500	57	4.20397e-68	1.59708e-65	4230000	4235000	0	130000	833	1
Bomo_Chr18	4247500	BmNPV	42500	58	1.07931e-69	4.12704e-67	4245000	4250000	0	130000	1005	1
Bomo_Chr18	6027500	BmNPV	42500	49	1.15952e-55	4.09994e-53	6025000	6030000	0	130000	864	1
Bomo_Chr18	6047500	BmNPV	92500	42	3.09835e-45	9.96948e-43	6040000	6050000	0	130000	707	0.519231
Bomo_Chr18	6127500	BmNPV	42500	47	1.23043e-52	4.24846e-50	6125000	6130000	0	130000	741	1
Bomo_Chr18	6242500	BmNPV	42500	24	5.51438e-21	1.15536e-18	6240000	6245000	0	70000	224	1
Bomo_Chr18	6242500	BmNPV	102500	21	2.04303e-17	3.84409e-15	6240000	6245000	75000	130000	180	1
Bomo_Chr18	6262500	BmNPV	47500	8	0.000161941	0.0122869	6260000	6265000	45000	50000	8	1
Bomo_Chr18	6262500	BmNPV	62500	8	0.000161941	0.0122869	6260000	6265000	60000	65000	8	1
Bomo_Chr18	6262500	BmNPV	92500	11	5.16374e-07	5.44926e-05	6260000	6265000	90000	95000	11	1
Bomo_Chr18	6627500	BmNPV	127500	53	8.10776e-62	2.98203e-59	6625000	6630000	0	130000	924	1
Bomo_Chr18	8197500	BmNPV	7500	9	2.6311e-05	0.00226373	8195000	8200000	5000	10000	9	1
Bomo_Chr18	8197500	BmNPV	42500	8	0.000161941	0.0122869	8195000	8200000	40000	45000	8	1
Bomo_Chr18	8267500	BmNPV	77500	64	2.18023e-79	8.61935e-77	8265000	8270000	0	130000	961	1
Bomo_Chr18	9577500	BmNPV	122500	97	1.47188e-136	6.2247e-134	9575000	9580000	0	130000	1564	1
Bomo_Chr18	10047500	BmNPV	97500	8	0.000161941	0.0122869	10045000	10050000	95000	100000	8	1
Bomo_Chr18	10102500	BmNPV	82500	10	3.86084e-06	0.000370259	10100000	10105000	75000	85000	18	1
Bomo_Chr18	10102500	BmNPV	92500	13	7.20433e-09	8.93195e-07	10100000	10105000	90000	95000	13	1
Bomo_Chr18	10102500	BmNPV	107500	9	2.6311e-05	0.00226373	10100000	10105000	105000	110000	9	1
Bomo_Chr18	10102500	BmNPV	122500	9	2.6311e-05	0.00226373	10100000	10105000	120000	125000	9	1
Bomo_Chr18	10442500	BmNPV	92500	8	0.000161941	0.0122869	10440000	10445000	90000	95000	8	1
Bomo_Chr18	10577500	BmNPV	77500	8	0.000161941	0.0122869	10575000	10580000	75000	80000	8	1
Bomo_Chr18	12017500	BmNPV	127500	8	0.000161941	0.0122869	12015000	12020000	125000	130000	8	1
Bomo_Chr18	12192500	BmNPV	42500	8	0.000161941	0.0122869	12190000	12195000	40000	45000	8	1
Bomo_Chr18	13017500	BmNPV	122500	8	0.000161941	0.0122869	13015000	13020000	120000	125000	8	1
Bomo_Chr18	13037500	BmNPV	2500	8	0.000161941	0.0122869	13035000	13040000	0	5000	8	1
Bomo_Chr18	13077500	BmNPV	97500	8	0.000161941	0.0122869	13075000	13080000	95000	100000	8	1
Bomo_Chr18	13112500	BmNPV	22500	8	0.000161941	0.0122869	13110000	13115000	20000	25000	8	1
Bomo_Chr18	13232500	BmNPV	82500	8	0.000161941	0.0122869	13230000	13235000	80000	85000	8	1
Bomo_Chr18	13277500	BmNPV	47500	9	2.6311e-05	0.00226373	13275000	13280000	45000	50000	9	1
Bomo_Chr18	13317500	BmNPV	127500	10	3.86084e-06	0.000370259	13315000	13320000	125000	130000	10	1
Bomo_Chr18	13642500	BmNPV	122500	8	0.000161941	0.0122869	13640000	13645000	120000	125000	8	1
Bomo_Chr18	14112500	BmNPV	82500	11	5.16374e-07	5.44926e-05	14110000	14115000	80000	85000	11	1
Bomo_Chr18	14202500	BmNPV	92500	8	0.000161941	0.0122869	14200000	14205000	90000	95000	8	1
Bomo_Chr18	14302500	BmNPV	122500	9	2.6311e-05	0.00226373	14300000	14305000	120000	125000	9	1
Bomo_Chr18	14427500	BmNPV	42500	8	0.000161941	0.0122869	14425000	14430000	40000	45000	8	1
Bomo_Chr18	14482500	BmNPV	67500	8	0.000161941	0.0122869	14480000	14485000	65000	70000	8	1
Bomo_Chr18	14527500	BmNPV	92500	8	0.000161941	0.0122869	14525000	14530000	90000	95000	8	1
Bomo_Chr18	14547500	BmNPV	122500	8	0.000161941	0.0122869	14545000	14550000	120000	125000	8	1
Bomo_Chr18	15112500	BmNPV	82500	8	0.000161941	0.0122869	15110000	15115000	80000	85000	8	1
Bomo_Chr18	15537500	BmNPV	97500	9	2.6311e-05	0.00226373	15535000	15540000	95000	100000	9	1
Bomo_Chr18	15657500	BmNPV	7500	8	0.000161941	0.0122869	15655000	15660000	5000	10000	8	1
Bomo_Chr18	15657500	BmNPV	22500	10	3.86084e-06	0.000370259	15655000	15660000	20000	25000	10	1
Bomo_Chr18	15657500	BmNPV	32500	14	7.60703e-10	1.01057e-07	15655000	15660000	30000	35000	14	1
Bomo_Chr18	15657500	BmNPV	97500	9	2.6311e-05	0.00226373	15655000	15660000	90000	100000	17	1
Bomo_Chr18	15657500	BmNPV	122500	10	3.86084e-06	0.000370259	15655000	15660000	120000	125000	10	1
Bomo_Chr19	27500	BmNPV	62500	8	0.000161941	0.0122869	25000	30000	60000	65000	8	1
Bomo_Chr19	682500	BmNPV	92500	8	0.000161941	0.0122869	680000	685000	90000	95000	8	1
Bomo_Chr19	682500	BmNPV	112500	8	0.000161941	0.0122869	680000	685000	110000	115000	8	1
Bomo_Chr19	1052500	BmNPV	92500	8	0.000161941	0.0122869	1050000	1055000	90000	95000	8	1
Bomo_Chr19	1177500	BmNPV	72500	8	0.000161941	0.0122869	1175000	1180000	70000	75000	8	1
Bomo_Chr19	1177500	BmNPV	122500	8	0.000161941	0.0122869	1175000	1180000	120000	125000	8	1
Bomo_Chr19	1227500	BmNPV	42500	8	0.000161941	0.0122869	1225000	1230000	40000	45000	8	1
Bomo_Chr19	1252500	BmNPV	122500	8	0.000161941	0.0122869	1250000	1255000	120000	125000	8	1
Bomo_Chr19	1562500	BmNPV	42500	9	2.6311e-05	0.00226373	1560000	1565000	40000	45000	9	1
Bomo_Chr19	1637500	BmNPV	97500	9	2.6311e-05	0.00226373	1635000	1640000	95000	100000	9	1
Bomo_Chr19	2112500	BmNPV	27500	8	0.000161941	0.0122869	2110000	2115000	25000	30000	8	1
Bomo_Chr19	2132500	BmNPV	52500	8	0.000161941	0.0122869	2130000	2135000	50000	55000	8	1
Bomo_Chr19	2307500	BmNPV	2500	12	6.34341e-08	7.28518e-06	2305000	2310000	0	15000	33	1
Bomo_Chr19	2307500	BmNPV	32500	29	2.80973e-27	6.84023e-25	2305000	2310000	20000	130000	379	1
Bomo_Chr19	2357500	BmNPV	32500	8	0.000161941	0.0122869	2355000	2360000	30000	35000	8	1
Bomo_Chr19	2882500	BmNPV	42500	8	0.000161941	0.0122869	2880000	2885000	40000	45000	8	1
Bomo_Chr19	3042500	BmNPV	77500	8	0.000161941	0.0122869	3040000	3045000	75000	80000	8	1
Bomo_Chr19	3202500	BmNPV	42500	11	5.16374e-07	5.44926e-05	3200000	3205000	40000	45000	11	1
Bomo_Chr19	3202500	BmNPV	77500	9	2.6311e-05	0.00226373	3200000	3205000	75000	80000	9	1
Bomo_Chr19	3202500	BmNPV	122500	8	0.000161941	0.0122869	3200000	3205000	120000	125000	8	1
Bomo_Chr19	3527500	BmNPV	77500	8	0.000161941	0.0122869	3525000	3530000	75000	80000	8	1
Bomo_Chr19	4457500	BmNPV	77500	8	0.000161941	0.0122869	4455000	4460000	75000	80000	8	1
Bomo_Chr19	5147500	BmNPV	82500	9	2.6311e-05	0.00226373	5145000	5150000	80000	85000	9	1
Bomo_Chr19	5677500	BmNPV	82500	45	1.20034e-49	4.03745e-47	5675000	5680000	0	130000	803	1
Bomo_Chr19	5697500	BmNPV	92500	56	1.60927e-66	6.06859e-64	5695000	5700000	0	130000	942	1
Bomo_Chr19	5707500	BmNPV	92500	65	4.99507e-81	1.98415e-78	5705000	5710000	0	130000	899	1
Bomo_Chr19	5742500	BmNPV	122500	46	3.88458e-51	1.32434e-48	5740000	5745000	0	130000	766	1
Bomo_Chr19	5752500	BmNPV	22500	9	2.6311e-05	0.00226373	5750000	5755000	20000	25000	9	1
Bomo_Chr19	5887500	BmNPV	127500	39	6.47249e-41	1.97736e-38	5885000	5890000	0	130000	653	1
Bomo_Chr19	6017500	BmNPV	47500	60	6.76062e-73	2.61759e-70	6015000	6020000	0	130000	989	1
Bomo_Chr19	6117500	BmNPV	2500	30	1.39291e-28	3.48312e-26	6115000	6120000	0	15000	73	1
Bomo_Chr19	6117500	BmNPV	92500	46	3.88458e-51	1.32434e-48	6115000	6120000	20000	130000	592	1
Bomo_Chr19	6132500	BmNPV	42500	48	3.81628e-54	1.33413e-51	6130000	6135000	0	130000	714	1
Bomo_Chr19	6142500	BmNPV	92500	41	8.74266e-44	2.76809e-41	6140000	6145000	0	130000	670	1
Bomo_Chr19	6487500	BmNPV	7500	16	6.94582e-12	1.04055e-09	6485000	6490000	0	15000	40	1
Bomo_Chr19	6487500	BmNPV	32500	21	2.04303e-17	3.84409e-15	6485000	6490000	20000	55000	110	1
Bomo_Chr19	6487500	BmNPV	92500	25	3.27804e-22	7.09219e-20	6485000	6490000	60000	130000	228	1
Bomo_Chr19	6592500	BmNPV	47500	44	3.62854e-48	1.20354e-45	6590000	6595000	0	130000	785	1
Bomo_Chr19	7272500	BmNPV	122500	9	2.6311e-05	0.00226373	7270000	7275000	120000	125000	9	1
Bomo_Chr19	7487500	BmNPV	2500	8	0.000161941	0.0122869	7485000	7490000	0	5000	8	1
Bomo_Chr19	8007500	BmNPV	22500	10	3.86084e-06	0.000370259	8005000	8010000	20000	25000	10	1
Bomo_Chr19	8032500	BmNPV	82500	10	3.86084e-06	0.000370259	8030000	8035000	80000	85000	10	1
Bomo_Chr19	8092500	BmNPV	7500	8	0.000161941	0.0122869	8090000	8095000	5000	10000	8	1
Bomo_Chr19	8092500	BmNPV	22500	14	7.60703e-10	1.01057e-07	8090000	8095000	20000	35000	38	1
Bomo_Chr19	8092500	BmNPV	42500	17	6.05488e-13	9.56178e-11	8090000	8095000	40000	55000	44	1
Bomo_Chr19	8092500	BmNPV	92500	30	1.39291e-28	3.48312e-26	8090000	8095000	60000	130000	191	1
Bomo_Chr19	8162500	BmNPV	62500	8	0.000161941	0.0122869	8160000	8165000	60000	65000	8	1
Bomo_Chr19	8267500	BmNPV	77500	8	0.000161941	0.0122869	8265000	8270000	75000	80000	8	1
Bomo_Chr19	9072500	BmNPV	42500	8	0.000161941	0.0122869	9070000	9075000	40000	45000	8	1
Bomo_Chr19	9072500	BmNPV	122500	8	0.000161941	0.0122869	9070000	9075000	120000	125000	8	1
Bomo_Chr19	9582500	BmNPV	2500	11	5.16374e-07	5.44926e-05	9580000	9585000	0	10000	21	1
Bomo_Chr19	9582500	BmNPV	32500	14	7.60703e-10	1.01057e-07	9580000	9585000	20000	35000	39	1
Bomo_Chr19	9582500	BmNPV	42500	19	3.89442e-15	6.7524e-13	9580000	9585000	40000	55000	40	1
Bomo_Chr19	9582500	BmNPV	77500	19	3.89442e-15	6.7524e-13	9580000	9585000	60000	85000	66	1
Bomo_Chr19	9582500	BmNPV	122500	18	4.98782e-14	8.26753e-12	9580000	9585000	90000	130000	108	1
Bomo_Chr19	10652500	BmNPV	47500	8	0.000161941	0.0122869	10650000	10655000	45000	55000	16	1
Bomo_Chr19	10652500	BmNPV	77500	11	5.16374e-07	5.44926e-05	10650000	10655000	75000	80000	11	1
Bomo_Chr19	10652500	BmNPV	97500	9	2.6311e-05	0.00226373	10650000	10655000	90000	100000	17	1
Bomo_Chr19	10957500	BmNPV	92500	9	2.6311e-05	0.00226373	10955000	10960000	90000	95000	9	1
Bomo_Chr19	11192500	BmNPV	47500	8	0.000161941	0.0122869	11190000	11195000	45000	50000	8	1
Bomo_Chr19	11402500	BmNPV	112500	8	0.000161941	0.0122869	11400000	11405000	110000	115000	8	1
Bomo_Chr19	11907500	BmNPV	97500	8	0.000161941	0.0122869	11905000	11910000	95000	100000	8	1
Bomo_Chr19	11942500	BmNPV	7500	10	3.86084e-06	0.000370259	11940000	11945000	5000	10000	10	1
Bomo_Chr19	11942500	BmNPV	27500	19	3.89442e-15	6.7524e-13	11940000	11945000	20000	35000	48	1
Bomo_Chr19	11942500	BmNPV	52500	16	6.94582e-12	1.04055e-09	11940000	11945000	40000	55000	44	1
Bomo_Chr19	11942500	BmNPV	62500	15	7.50423e-11	1.06161e-08	11940000	11945000	60000	70000	24	1
Bomo_Chr19	11942500	BmNPV	77500	19	3.89442e-15	6.7524e-13	11940000	11945000	75000	85000	34	1
Bomo_Chr19	11942500	BmNPV	92500	12	6.34341e-08	7.28518e-06	11940000	11945000	90000	100000	20	1
Bomo_Chr19	11942500	BmNPV	112500	14	7.60703e-10	1.01057e-07	11940000	11945000	105000	115000	25	1
Bomo_Chr19	11942500	BmNPV	122500	11	5.16374e-07	5.44926e-05	11940000	11945000	120000	125000	11	1
Bomo_Chr19	12927500	BmNPV	27500	15	7.50423e-11	1.06161e-08	12925000	12930000	25000	35000	25	1
Bomo_Chr19	12927500	BmNPV	47500	10	3.86084e-06	0.000370259	12925000	12930000	40000	50000	18	1
Bomo_Chr19	12927500	BmNPV	77500	12	6.34341e-08	7.28518e-06	12925000	12930000	75000	80000	12	1
Bomo_Chr19	12927500	BmNPV	87500	9	2.6311e-05	0.00226373	12925000	12930000	85000	90000	9	1
Bomo_Chr19	13117500	BmNPV	92500	8	0.000161941	0.0122869	13115000	13120000	90000	95000	8	1
Bomo_Chr19	14437500	BmNPV	62500	8	0.000161941	0.0122869	14435000	14440000	60000	65000	8	1
Bomo_Chr19	14437500	BmNPV	92500	9	2.6311e-05	0.00226373	14435000	14440000	90000	95000	9	1
Bomo_Chr19	14697500	BmNPV	42500	8	0.000161941	0.0122869	14695000	14700000	40000	50000	16	1
Bomo_Chr19	14697500	BmNPV	122500	10	3.86084e-06	0.000370259	14695000	14700000	120000	125000	10	1
Bomo_Chr2	382500	BmNPV	32500	8	0.000161941	0.0122869	380000	385000	30000	35000	8	1
Bomo_Chr2	382500	BmNPV	82500	9	2.6311e-05	0.00226373	380000	385000	80000	85000	9	1
Bomo_Chr2	437500	BmNPV	112500	8	0.000161941	0.0122869	435000	440000	110000	115000	8	1
Bomo_Chr2	477500	BmNPV	112500	9	2.6311e-05	0.00226373	475000	480000	110000	115000	9	1
Bomo_Chr2	532500	BmNPV	77500	8	0.000161941	0.0122869	530000	535000	75000	80000	8	1
Bomo_Chr2	632500	BmNPV	62500	10	3.86084e-06	0.000370259	630000	635000	60000	65000	10	1
Bomo_Chr2	632500	BmNPV	82500	8	0.000161941	0.0122869	630000	635000	80000	85000	8	1
Bomo_Chr2	647500	BmNPV	27500	8	0.000161941	0.0122869	645000	650000	25000	30000	8	1
Bomo_Chr2	647500	BmNPV	42500	11	5.16374e-07	5.44926e-05	645000	650000	40000	45000	11	1
Bomo_Chr2	672500	BmNPV	82500	8	0.000161941	0.0122869	670000	675000	80000	85000	8	1
Bomo_Chr2	752500	BmNPV	82500	8	0.000161941	0.0122869	750000	755000	80000	85000	8	1
Bomo_Chr2	1057500	BmNPV	92500	54	2.23558e-63	8.29362e-61	1055000	1060000	0	130000	947	1
Bomo_Chr2	1082500	BmNPV	42500	53	8.10776e-62	2.98203e-59	1080000	1085000	0	130000	786	1
Bomo_Chr2	1092500	BmNPV	122500	42	3.09835e-45	9.96948e-43	1090000	1095000	0	130000	769	1
Bomo_Chr2	1162500	BmNPV	82500	131	1.27918e-200	5.47143e-198	1160000	1165000	0	130000	2050	1
Bomo_Chr2	1307500	BmNPV	92500	52	2.88604e-60	1.05177e-57	1305000	1310000	0	130000	886	1
Bomo_Chr2	1472500	BmNPV	92500	71	5.28461e-91	2.1461e-88	1470000	1475000	0	130000	1045	1
Bomo_Chr2	1482500	BmNPV	32500	8	0.000161941	0.0122869	1480000	1485000	30000	35000	8	1
Bomo_Chr2	1482500	BmNPV	122500	11	5.16374e-07	5.44926e-05	1480000	1485000	120000	125000	11	1
Bomo_Chr2	1497500	BmNPV	12500	8	0.000161941	0.0122869	1495000	1500000	10000	15000	8	1
Bomo_Chr2	1497500	BmNPV	27500	13	7.20433e-09	8.93195e-07	1495000	1500000	25000	35000	22	1
Bomo_Chr2	1497500	BmNPV	42500	19	3.89442e-15	6.7524e-13	1495000	1500000	40000	65000	59	1
Bomo_Chr2	1497500	BmNPV	92500	11	5.16374e-07	5.44926e-05	1495000	1500000	85000	95000	19	1
Bomo_Chr2	1497500	BmNPV	112500	9	2.6311e-05	0.00226373	1495000	1500000	110000	115000	9	1
Bomo_Chr2	1497500	BmNPV	127500	16	6.94582e-12	1.04055e-09	1495000	1500000	125000	130000	16	1
Bomo_Chr2	1547500	BmNPV	92500	41	8.74266e-44	2.76809e-41	1545000	1555000	0	130000	1297	0.980769
Bomo_Chr2	1572500	BmNPV	92500	89	3.54052e-122	1.48762e-119	1560000	1575000	0	130000	2942	1
Bomo_Chr2	1587500	BmNPV	92500	95	6.17791e-133	2.60943e-130	1585000	1590000	0	130000	1445	1
Bomo_Chr2	1607500	BmNPV	27500	32	3.10672e-31	8.16794e-29	1605000	1610000	0	130000	581	1
Bomo_Chr2	1702500	BmNPV	92500	32	3.10672e-31	8.16794e-29	1700000	1705000	0	130000	500	1
Bomo_Chr2	1822500	BmNPV	82500	56	1.60927e-66	6.06859e-64	1820000	1825000	0	130000	828	1
Bomo_Chr2	2077500	BmNPV	82500	8	0.000161941	0.0122869	2075000	2080000	80000	85000	8	1
Bomo_Chr2	2112500	BmNPV	62500	9	2.6311e-05	0.00226373	2110000	2115000	60000	65000	9	1
Bomo_Chr2	2112500	BmNPV	82500	9	2.6311e-05	0.00226373	2110000	2115000	80000	85000	9	1
Bomo_Chr2	2267500	BmNPV	92500	12	6.34341e-08	7.28518e-06	2265000	2275000	90000	95000	24	1
Bomo_Chr2	2267500	BmNPV	112500	9	2.6311e-05	0.00226373	2265000	2275000	110000	115000	18	1
Bomo_Chr2	2267500	BmNPV	127500	10	3.86084e-06	0.000370259	2265000	2275000	120000	130000	28	0.75
Bomo_Chr2	2272500	BmNPV	7500	10	3.86084e-06	0.000370259	2270000	2275000	5000	10000	10	1
Bomo_Chr2	2272500	BmNPV	42500	23	8.90719e-20	1.80413e-17	2270000	2275000	15000	45000	76	1
Bomo_Chr2	2272500	BmNPV	52500	10	3.86084e-06	0.000370259	2270000	2275000	50000	55000	10	1
Bomo_Chr2	2272500	BmNPV	62500	9	2.6311e-05	0.00226373	2270000	2275000	60000	65000	9	1
Bomo_Chr2	2272500	BmNPV	77500	13	7.20433e-09	8.93195e-07	2270000	2275000	75000	85000	25	1
Bomo_Chr2	2272500	BmNPV	102500	10	3.86084e-06	0.000370259	2265000	2275000	100000	105000	20	1
Bomo_Chr2	2282500	BmNPV	82500	9	2.6311e-05	0.00226373	2280000	2285000	80000	85000	9	1
Bomo_Chr2	2462500	BmNPV	2500	8	0.000161941	0.0122869	2460000	2465000	0	5000	8	1
Bomo_Chr2	2667500	BmNPV	32500	9	2.6311e-05	0.00226373	2665000	2670000	30000	35000	9	1
Bomo_Chr2	2862500	BmNPV	112500	11	5.16374e-07	5.44926e-05	2860000	2865000	110000	115000	11	1
Bomo_Chr2	2862500	BmNPV	127500	8	0.000161941	0.0122869	2860000	2870000	120000	130000	16	0.5
Bomo_Chr2	2867500	BmNPV	92500	8	0.000161941	0.0122869	2865000	2870000	90000	95000	8	1
Bomo_Chr2	2892500	BmNPV	92500	8	0.000161941	0.0122869	2890000	2895000	90000	95000	8	1
Bomo_Chr2	2892500	BmNPV	112500	9	2.6311e-05	0.00226373	2890000	2895000	110000	115000	9	1
Bomo_Chr2	3032500	BmNPV	42500	11	5.16374e-07	5.44926e-05	3030000	3035000	40000	45000	11	1
Bomo_Chr2	3032500	BmNPV	102500	9	2.6311e-05	0.00226373	3030000	3035000	100000	105000	9	1
Bomo_Chr2	3197500	BmNPV	52500	8	0.000161941	0.0122869	3195000	3200000	50000	55000	8	1
Bomo_Chr2	3312500	BmNPV	122500	8	0.000161941	0.0122869	3310000	3315000	120000	125000	8	1
Bomo_Chr2	3382500	BmNPV	82500	8	0.000161941	0.0122869	3380000	3385000	80000	85000	8	1
Bomo_Chr2	3487500	BmNPV	27500	9	2.6311e-05	0.00226373	3485000	3490000	25000	30000	9	1
Bomo_Chr2	4087500	BmNPV	107500	8	0.000161941	0.0122869	4085000	4090000	105000	110000	8	1
Bomo_Chr2	4087500	BmNPV	122500	9	2.6311e-05	0.00226373	4085000	4090000	120000	125000	9	1
Bomo_Chr2	4237500	BmNPV	82500	10	3.86084e-06	0.000370259	4235000	4240000	80000	85000	10	1
Bomo_Chr2	4402500	BmNPV	27500	9	2.6311e-05	0.00226373	4400000	4405000	25000	30000	9	1
Bomo_Chr2	4442500	BmNPV	27500	11	5.16374e-07	5.44926e-05	4440000	4445000	20000	30000	19	1
Bomo_Chr2	4442500	BmNPV	62500	9	2.6311e-05	0.00226373	4440000	4445000	60000	65000	9	1
Bomo_Chr2	4442500	BmNPV	122500	9	2.6311e-05	0.00226373	4440000	4445000	120000	125000	9	1
Bomo_Chr2	5257500	BmNPV	42500	99	3.3658e-140	1.42519e-137	5255000	5260000	0	130000	1617	1
Bomo_Chr2	5412500	BmNPV	92500	50	3.45266e-57	1.23438e-54	5410000	5415000	0	130000	836	1
Bomo_Chr2	5422500	BmNPV	127500	55	6.05227e-65	2.26411e-62	5420000	5430000	0	130000	1690	1
Bomo_Chr2	5497500	BmNPV	77500	10	3.86084e-06	0.000370259	5495000	5500000	75000	80000	10	1
Bomo_Chr2	5497500	BmNPV	97500	9	2.6311e-05	0.00226373	5495000	5500000	95000	100000	9	1
Bomo_Chr2	5497500	BmNPV	112500	9	2.6311e-05	0.00226373	5495000	5500000	110000	115000	9	1
Bomo_Chr2	5497500	BmNPV	122500	8	0.000161941	0.0122869	5495000	5500000	120000	125000	8	1
Bomo_Chr2	5562500	BmNPV	42500	61	1.65039e-74	6.42535e-72	5560000	5565000	0	130000	913	1
Bomo_Chr2	5577500	BmNPV	82500	81	4.16304e-108	1.73041e-105	5570000	5585000	0	130000	3103	1
Bomo_Chr2	5597500	BmNPV	82500	51	1.00795e-58	3.64036e-56	5595000	5600000	0	130000	880	1
Bomo_Chr2	5692500	BmNPV	82500	40	2.40829e-42	7.49264e-40	5690000	5695000	0	130000	722	1
Bomo_Chr2	5722500	BmNPV	27500	57	4.20397e-68	1.59708e-65	5720000	5725000	0	130000	1054	1
Bomo_Chr2	5747500	BmNPV	22500	52	2.88604e-60	1.05177e-57	5745000	5755000	0	130000	1683	1
Bomo_Chr2	5762500	BmNPV	122500	53	8.10776e-62	2.98203e-59	5760000	5765000	0	130000	876	1
Bomo_Chr2	5772500	BmNPV	77500	47	1.23043e-52	4.24846e-50	5770000	5775000	0	130000	813	1
Bomo_Chr2	5797500	BmNPV	42500	68	5.48653e-86	2.2059e-83	5780000	5800000	0	130000	3509	1
Bomo_Chr2	5812500	BmNPV	92500	52	2.88604e-60	1.05177e-57	5810000	5815000	0	130000	804	1
Bomo_Chr2	5822500	BmNPV	62500	66	1.12708e-82	4.49776e-80	5820000	5830000	0	130000	1878	1
Bomo_Chr2	6007500	BmNPV	92500	50	3.45266e-57	1.23438e-54	6005000	6010000	0	130000	885	1
Bomo_Chr2	6017500	BmNPV	82500	51	1.00795e-58	3.64036e-56	6015000	6020000	0	130000	821	1
Bomo_Chr2	6267500	BmNPV	62500	42	3.09835e-45	9.96948e-43	6265000	6270000	0	130000	598	1
Bomo_Chr2	6452500	BmNPV	47500	8	0.000161941	0.0122869	6450000	6455000	45000	50000	8	1
Bomo_Chr2	6452500	BmNPV	92500	10	3.86084e-06	0.000370259	6450000	6455000	90000	95000	10	1
Bomo_Chr2	6452500	BmNPV	122500	8	0.000161941	0.0122869	6450000	6455000	120000	125000	8	1
Bomo_Chr2	6807500	BmNPV	82500	9	2.6311e-05	0.00226373	6805000	6810000	80000	85000	9	1
Bomo_Chr2	6807500	BmNPV	92500	8	0.000161941	0.0122869	6805000	6810000	90000	95000	8	1
Bomo_Chr2	6977500	BmNPV	42500	8	0.000161941	0.0122869	6975000	6980000	40000	45000	8	1
Bomo_Chr2	7032500	BmNPV	62500	38	1.69613e-39	5.08407e-37	7030000	7035000	0	130000	536	1
Bomo_Chr2	7612500	BmNPV	82500	8	0.000161941	0.0122869	7610000	7615000	80000	85000	8	1
Bomo_Chr2	7707500	BmNPV	82500	560	0	0	7705000	7710000	0	130000	9133	1
Bomo_Chr2	7722500	BmNPV	27500	10	3.86084e-06	0.000370259	7720000	7725000	25000	30000	10	1
Bomo_Chr2	7722500	BmNPV	37500	8	0.000161941	0.0122869	7720000	7725000	35000	40000	8	1
Bomo_Chr2	7722500	BmNPV	62500	12	6.34341e-08	7.28518e-06	7720000	7725000	60000	65000	12	1
Bomo_Chr2	7722500	BmNPV	82500	10	3.86084e-06	0.000370259	7720000	7725000	80000	85000	10	1
Bomo_Chr2	7722500	BmNPV	112500	9	2.6311e-05	0.00226373	7720000	7725000	110000	115000	9	1
Bomo_Chr2	7877500	BmNPV	92500	49	1.15952e-55	4.09994e-53	7875000	7880000	0	130000	756	1
Bomo_Chr2	8107500	BmNPV	97500	10	3.86084e-06	0.000370259	8105000	8110000	95000	100000	10	1
Bomo_Chr2	8202500	BmNPV	27500	9	2.6311e-05	0.00226373	8200000	8205000	25000	30000	9	1
Bomo_Chr2	8202500	BmNPV	42500	9	2.6311e-05	0.00226373	8200000	8205000	40000	45000	9	1
Bomo_Chr2	8202500	BmNPV	122500	9	2.6311e-05	0.00226373	8200000	8205000	120000	125000	9	1
Bomo_Chr2	8237500	BmNPV	122500	59	2.72403e-71	1.04835e-68	8235000	8240000	0	130000	891	1
Bomo_Chr2	8287500	BmNPV	42500	47	1.23043e-52	4.24846e-50	8285000	8290000	0	130000	768	1
Bomo_Chr2	8347500	BmNPV	7500	16	6.94582e-12	1.04055e-09	8345000	8350000	0	15000	39	1
Bomo_Chr2	8347500	BmNPV	22500	15	7.50423e-11	1.06161e-08	8345000	8350000	20000	35000	41	1
Bomo_Chr2	8347500	BmNPV	42500	26	1.87403e-23	4.18485e-21	8345000	8350000	40000	85000	163	1
Bomo_Chr2	8347500	BmNPV	127500	19	3.89442e-15	6.7524e-13	8345000	8350000	90000	130000	117	1
Bomo_Chr20	187500	BmNPV	92500	52	2.88604e-60	1.05177e-57	180000	195000	0	130000	2308	0.987179
Bomo_Chr20	297500	BmNPV	112500	12	6.34341e-08	7.28518e-06	295000	300000	110000	115000	12	1
Bomo_Chr20	312500	BmNPV	82500	8	0.000161941	0.0122869	310000	315000	80000	85000	8	1
Bomo_Chr20	577500	BmNPV	82500	29	2.80973e-27	6.84023e-25	575000	580000	0	130000	443	1
Bomo_Chr20	782500	BmNPV	92500	9	2.6311e-05	0.00226373	780000	785000	90000	95000	9	1
Bomo_Chr20	847500	BmNPV	82500	8	0.000161941	0.0122869	845000	850000	80000	85000	8	1
Bomo_Chr20	942500	BmNPV	47500	8	0.000161941	0.0122869	940000	945000	45000	50000	8	1
Bomo_Chr20	942500	BmNPV	122500	8	0.000161941	0.0122869	940000	945000	120000	125000	8	1
Bomo_Chr20	1367500	BmNPV	87500	8	0.000161941	0.0122869	1365000	1370000	85000	90000	8	1
Bomo_Chr20	1472500	BmNPV	42500	8	0.000161941	0.0122869	1470000	1475000	40000	45000	8	1
Bomo_Chr20	1472500	BmNPV	77500	8	0.000161941	0.0122869	1470000	1475000	75000	80000	8	1
Bomo_Chr20	2612500	BmNPV	127500	8	0.000161941	0.0122869	2610000	2615000	125000	130000	8	1
Bomo_Chr20	3642500	BmNPV	92500	8	0.000161941	0.0122869	3640000	3645000	90000	95000	8	1
Bomo_Chr20	3902500	BmNPV	42500	8	0.000161941	0.0122869	3900000	3905000	40000	45000	8	1
Bomo_Chr20	3962500	BmNPV	42500	8	0.000161941	0.0122869	3960000	3965000	40000	45000	8	1
Bomo_Chr20	4002500	BmNPV	32500	21	2.04303e-17	3.84409e-15	4000000	4005000	0	85000	236	1
Bomo_Chr20	4002500	BmNPV	92500	29	2.80973e-27	6.84023e-25	4000000	4005000	90000	130000	142	1
Bomo_Chr20	4077500	BmNPV	42500	8	0.000161941	0.0122869	4075000	4080000	40000	45000	8	1
Bomo_Chr20	4162500	BmNPV	112500	10	3.86084e-06	0.000370259	4160000	4165000	110000	115000	10	1
Bomo_Chr20	4412500	BmNPV	7500	15	7.50423e-11	1.06161e-08	4410000	4415000	0	15000	33	1
Bomo_Chr20	4412500	BmNPV	47500	23	8.90719e-20	1.80413e-17	4410000	4415000	20000	130000	332	1
Bomo_Chr20	4507500	BmNPV	62500	44	3.62854e-48	1.20354e-45	4505000	4510000	0	130000	706	1
Bomo_Chr20	4857500	BmNPV	112500	9	2.6311e-05	0.00226373	4855000	4860000	110000	115000	9	1
Bomo_Chr20	5287500	BmNPV	22500	8	0.000161941	0.0122869	5285000	5290000	20000	25000	8	1
Bomo_Chr20	5287500	BmNPV	62500	9	2.6311e-05	0.00226373	5285000	5290000	60000	65000	9	1
Bomo_Chr20	5382500	BmNPV	62500	8	0.000161941	0.0122869	5380000	5385000	60000	65000	8	1
Bomo_Chr20	6392500	BmNPV	2500	8	0.000161941	0.0122869	6390000	6395000	0	5000	8	1
Bomo_Chr20	6497500	BmNPV	42500	8	0.000161941	0.0122869	6495000	6500000	40000	45000	8	1
Bomo_Chr20	6497500	BmNPV	82500	9	2.6311e-05	0.00226373	6495000	6500000	80000	85000	9	1
Bomo_Chr20	6612500	BmNPV	122500	8	0.000161941	0.0122869	6610000	6615000	120000	125000	8	1
Bomo_Chr20	6972500	BmNPV	107500	8	0.000161941	0.0122869	6970000	6975000	105000	110000	8	1
Bomo_Chr20	7407500	BmNPV	77500	10	3.86084e-06	0.000370259	7405000	7410000	75000	85000	20	1
Bomo_Chr20	7557500	BmNPV	112500	8	0.000161941	0.0122869	7555000	7560000	110000	115000	8	1
Bomo_Chr20	7582500	BmNPV	52500	8	0.000161941	0.0122869	7580000	7585000	50000	55000	8	1
Bomo_Chr20	7582500	BmNPV	122500	9	2.6311e-05	0.00226373	7580000	7585000	120000	125000	9	1
Bomo_Chr20	7587500	BmNPV	62500	8	0.000161941	0.0122869	7585000	7590000	60000	65000	8	1
Bomo_Chr20	7987500	BmNPV	22500	9	2.6311e-05	0.00226373	7985000	7990000	20000	25000	9	1
Bomo_Chr20	8022500	BmNPV	42500	9	2.6311e-05	0.00226373	8020000	8025000	40000	45000	9	1
Bomo_Chr20	8022500	BmNPV	122500	9	2.6311e-05	0.00226373	8020000	8025000	120000	125000	9	1
Bomo_Chr20	8132500	BmNPV	112500	9	2.6311e-05	0.00226373	8130000	8135000	110000	115000	9	1
Bomo_Chr20	8217500	BmNPV	92500	9	2.6311e-05	0.00226373	8215000	8220000	90000	95000	9	1
Bomo_Chr20	8232500	BmNPV	97500	9	2.6311e-05	0.00226373	8230000	8235000	95000	100000	9	1
Bomo_Chr20	8432500	BmNPV	62500	8	0.000161941	0.0122869	8430000	8435000	60000	65000	8	1
Bomo_Chr20	8817500	BmNPV	92500	8	0.000161941	0.0122869	8815000	8820000	90000	95000	8	1
Bomo_Chr20	9272500	BmNPV	92500	11	5.16374e-07	5.44926e-05	9270000	9275000	90000	95000	11	1
Bomo_Chr20	9272500	BmNPV	112500	9	2.6311e-05	0.00226373	9270000	9275000	110000	115000	9	1
Bomo_Chr20	9347500	BmNPV	7500	11	5.16374e-07	5.44926e-05	9345000	9350000	0	10000	19	1
Bomo_Chr20	9347500	BmNPV	42500	15	7.50423e-11	1.06161e-08	9345000	9350000	15000	70000	120	1
Bomo_Chr20	9347500	BmNPV	82500	17	6.05488e-13	9.56178e-11	9345000	9350000	75000	85000	29	1
Bomo_Chr20	9347500	BmNPV	97500	14	7.60703e-10	1.01057e-07	9345000	9350000	90000	130000	83	1
Bomo_Chr20	9532500	BmNPV	42500	8	0.000161941	0.0122869	9530000	9535000	40000	45000	8	1
Bomo_Chr20	9532500	BmNPV	77500	8	0.000161941	0.0122869	9530000	9535000	75000	80000	8	1
Bomo_Chr20	9532500	BmNPV	92500	8	0.000161941	0.0122869	9530000	9535000	90000	95000	8	1
Bomo_Chr20	9967500	BmNPV	42500	8	0.000161941	0.0122869	9965000	9970000	40000	45000	8	1
Bomo_Chr20	10247500	BmNPV	47500	8	0.000161941	0.0122869	10245000	10250000	45000	55000	16	1
Bomo_Chr20	10247500	BmNPV	82500	9	2.6311e-05	0.00226373	10245000	10250000	80000	85000	9	1
Bomo_Chr20	10247500	BmNPV	102500	8	0.000161941	0.0122869	10245000	10250000	100000	105000	8	1
Bomo_Chr20	10292500	BmNPV	42500	122	3.03925e-183	1.29767e-180	10290000	10295000	0	130000	1824	1
Bomo_Chr20	10787500	BmNPV	77500	10	3.86084e-06	0.000370259	10785000	10790000	75000	80000	10	1
Bomo_Chr20	10967500	BmNPV	92500	8	0.000161941	0.0122869	10965000	10970000	90000	95000	8	1
Bomo_Chr20	10997500	BmNPV	22500	10	3.86084e-06	0.000370259	10995000	11000000	20000	30000	19	1
Bomo_Chr20	10997500	BmNPV	42500	9	2.6311e-05	0.00226373	10995000	11000000	40000	45000	9	1
Bomo_Chr20	10997500	BmNPV	97500	9	2.6311e-05	0.00226373	10995000	11000000	95000	105000	17	1
Bomo_Chr20	11212500	BmNPV	42500	8	0.000161941	0.0122869	11210000	11215000	40000	45000	8	1
Bomo_Chr20	11292500	BmNPV	27500	10	3.86084e-06	0.000370259	11290000	11295000	25000	30000	10	1
Bomo_Chr20	11302500	BmNPV	22500	8	0.000161941	0.0122869	11300000	11305000	20000	25000	8	1
Bomo_Chr20	11322500	BmNPV	127500	10	3.86084e-06	0.000370259	11320000	11325000	125000	130000	10	1
Bomo_Chr20	11337500	BmNPV	67500	9	2.6311e-05	0.00226373	11335000	11340000	65000	70000	9	1
Bomo_Chr20	11337500	BmNPV	112500	8	0.000161941	0.0122869	11335000	11340000	110000	115000	8	1
Bomo_Chr20	11552500	BmNPV	32500	12	6.34341e-08	7.28518e-06	11550000	11555000	30000	35000	12	1
Bomo_Chr20	11552500	BmNPV	42500	8	0.000161941	0.0122869	11550000	11555000	40000	45000	8	1
Bomo_Chr20	11632500	BmNPV	82500	9	2.6311e-05	0.00226373	11630000	11635000	80000	85000	9	1
Bomo_Chr20	11797500	BmNPV	122500	9	2.6311e-05	0.00226373	11795000	11800000	120000	130000	17	1
Bomo_Chr20	12152500	BmNPV	77500	10	3.86084e-06	0.000370259	12150000	12155000	75000	80000	10	1
Bomo_Chr21	2500	BmNPV	112500	8	0.000161941	0.0122869	0	5000	110000	115000	8	1
Bomo_Chr21	557500	BmNPV	112500	10	3.86084e-06	0.000370259	555000	560000	110000	115000	10	1
Bomo_Chr21	1367500	BmNPV	112500	8	0.000161941	0.0122869	1365000	1370000	110000	115000	8	1
Bomo_Chr21	1447500	BmNPV	62500	8	0.000161941	0.0122869	1445000	1450000	60000	65000	8	1
Bomo_Chr21	1592500	BmNPV	112500	8	0.000161941	0.0122869	1590000	1595000	110000	115000	8	1
Bomo_Chr21	1597500	BmNPV	62500	8	0.000161941	0.0122869	1595000	1600000	60000	65000	8	1
Bomo_Chr21	1672500	BmNPV	77500	9	2.6311e-05	0.00226373	1670000	1675000	75000	85000	17	1
Bomo_Chr21	1672500	BmNPV	127500	9	2.6311e-05	0.00226373	1670000	1675000	125000	130000	9	1
Bomo_Chr21	1692500	BmNPV	97500	8	0.000161941	0.0122869	1690000	1695000	95000	100000	8	1
Bomo_Chr21	1702500	BmNPV	32500	8	0.000161941	0.0122869	1700000	1705000	30000	35000	8	1
Bomo_Chr21	2222500	BmNPV	27500	11	5.16374e-07	5.44926e-05	2220000	2225000	15000	30000	30	1
Bomo_Chr21	2222500	BmNPV	47500	9	2.6311e-05	0.00226373	2220000	2225000	40000	50000	17	1
Bomo_Chr21	2222500	BmNPV	67500	9	2.6311e-05	0.00226373	2220000	2225000	65000	75000	18	1
Bomo_Chr21	2222500	BmNPV	82500	10	3.86084e-06	0.000370259	2220000	2225000	80000	85000	10	1
Bomo_Chr21	2222500	BmNPV	92500	15	7.50423e-11	1.06161e-08	2220000	2225000	90000	100000	25	1
Bomo_Chr21	2222500	BmNPV	112500	10	3.86084e-06	0.000370259	2220000	2225000	105000	115000	18	1
Bomo_Chr21	2222500	BmNPV	122500	10	3.86084e-06	0.000370259	2220000	2225000	120000	125000	10	1
Bomo_Chr21	2522500	BmNPV	82500	45	1.20034e-49	4.03745e-47	2520000	2525000	0	130000	726	1
Bomo_Chr21	2532500	BmNPV	122500	45	1.20034e-49	4.03745e-47	2530000	2535000	0	130000	724	1
Bomo_Chr21	2542500	BmNPV	122500	62	3.964e-76	1.55196e-73	2540000	2545000	0	130000	820	1
Bomo_Chr21	2552500	BmNPV	122500	44	3.62854e-48	1.20354e-45	2550000	2555000	0	130000	713	1
Bomo_Chr21	2567500	BmNPV	92500	40	2.40829e-42	7.49264e-40	2560000	2570000	0	130000	1303	1
Bomo_Chr21	2627500	BmNPV	42500	39	6.47249e-41	1.97736e-38	2625000	2630000	0	130000	671	1
Bomo_Chr21	3372500	BmNPV	72500	8	0.000161941	0.0122869	3370000	3375000	70000	75000	8	1
Bomo_Chr21	3372500	BmNPV	92500	8	0.000161941	0.0122869	3370000	3375000	90000	95000	8	1
Bomo_Chr21	3742500	BmNPV	112500	8	0.000161941	0.0122869	3740000	3745000	110000	115000	8	1
Bomo_Chr21	4467500	BmNPV	92500	12	6.34341e-08	7.28518e-06	4465000	4470000	90000	95000	12	1
Bomo_Chr21	4507500	BmNPV	112500	8	0.000161941	0.0122869	4505000	4510000	110000	115000	8	1
Bomo_Chr21	4647500	BmNPV	42500	8	0.000161941	0.0122869	4645000	4650000	40000	45000	8	1
Bomo_Chr21	5127500	BmNPV	47500	8	0.000161941	0.0122869	5125000	5130000	45000	50000	8	1
Bomo_Chr21	5447500	BmNPV	92500	8	0.000161941	0.0122869	5445000	5450000	90000	95000	8	1
Bomo_Chr21	5732500	BmNPV	112500	8	0.000161941	0.0122869	5730000	5735000	110000	115000	8	1
Bomo_Chr21	5762500	BmNPV	62500	9	2.6311e-05	0.00226373	5760000	5765000	60000	65000	9	1
Bomo_Chr21	6567500	BmNPV	122500	9	2.6311e-05	0.00226373	6565000	6570000	120000	125000	9	1
Bomo_Chr21	6927500	BmNPV	42500	9	2.6311e-05	0.00226373	6925000	6930000	40000	45000	9	1
Bomo_Chr21	6927500	BmNPV	62500	8	0.000161941	0.0122869	6925000	6930000	60000	65000	8	1
Bomo_Chr21	6927500	BmNPV	82500	9	2.6311e-05	0.00226373	6925000	6930000	80000	85000	9	1
Bomo_Chr21	8127500	BmNPV	77500	8	0.000161941	0.0122869	8125000	8130000	75000	80000	8	1
Bomo_Chr21	8197500	BmNPV	77500	8	0.000161941	0.0122869	8195000	8200000	75000	80000	8	1
Bomo_Chr21	8302500	BmNPV	92500	10	3.86084e-06	0.000370259	8300000	8305000	90000	95000	10	1
Bomo_Chr21	8712500	BmNPV	82500	9	2.6311e-05	0.00226373	8710000	8715000	80000	85000	9	1
Bomo_Chr21	8767500	BmNPV	127500	8	0.000161941	0.0122869	8765000	8770000	125000	130000	8	1
Bomo_Chr21	9217500	BmNPV	42500	9	2.6311e-05	0.00226373	9215000	9220000	40000	45000	9	1
Bomo_Chr21	9217500	BmNPV	77500	10	3.86084e-06	0.000370259	9215000	9220000	75000	80000	10	1
Bomo_Chr21	9752500	BmNPV	122500	8	0.000161941	0.0122869	9750000	9755000	120000	125000	8	1
Bomo_Chr21	10187500	BmNPV	27500	8	0.000161941	0.0122869	10185000	10190000	25000	30000	8	1
Bomo_Chr21	10387500	BmNPV	77500	8	0.000161941	0.0122869	10385000	10390000	75000	80000	8	1
Bomo_Chr21	10417500	BmNPV	122500	9	2.6311e-05	0.00226373	10415000	10420000	120000	125000	9	1
Bomo_Chr21	10517500	BmNPV	62500	8	0.000161941	0.0122869	10515000	10520000	60000	65000	8	1
Bomo_Chr21	10602500	BmNPV	122500	8	0.000161941	0.0122869	10600000	10605000	120000	125000	8	1
Bomo_Chr21	10692500	BmNPV	62500	8	0.000161941	0.0122869	10690000	10695000	60000	65000	8	1
Bomo_Chr21	10802500	BmNPV	22500	8	0.000161941	0.0122869	10800000	10805000	20000	25000	8	1
Bomo_Chr21	10942500	BmNPV	42500	9	2.6311e-05	0.00226373	10940000	10945000	40000	45000	9	1
Bomo_Chr21	11082500	BmNPV	82500	11	5.16374e-07	5.44926e-05	11080000	11085000	80000	85000	11	1
Bomo_Chr21	11082500	BmNPV	92500	15	7.50423e-11	1.06161e-08	11080000	11085000	90000	95000	15	1
Bomo_Chr21	11372500	BmNPV	67500	8	0.000161941	0.0122869	11370000	11375000	65000	70000	8	1
Bomo_Chr21	11522500	BmNPV	52500	8	0.000161941	0.0122869	11520000	11525000	50000	55000	8	1
Bomo_Chr21	11602500	BmNPV	117500	8	0.000161941	0.0122869	11600000	11605000	115000	120000	8	1
Bomo_Chr21	11787500	BmNPV	2500	8	0.000161941	0.0122869	11785000	11790000	0	5000	8	1
Bomo_Chr21	11787500	BmNPV	32500	8	0.000161941	0.0122869	11785000	11790000	30000	35000	8	1
Bomo_Chr21	11787500	BmNPV	77500	8	0.000161941	0.0122869	11785000	11790000	75000	85000	16	1
Bomo_Chr21	11932500	BmNPV	42500	9	2.6311e-05	0.00226373	11930000	11935000	40000	45000	9	1
Bomo_Chr21	12037500	BmNPV	27500	9	2.6311e-05	0.00226373	12035000	12040000	25000	30000	9	1
Bomo_Chr21	12342500	BmNPV	2500	9	2.6311e-05	0.00226373	12340000	12345000	0	5000	9	1
Bomo_Chr21	12342500	BmNPV	12500	9	2.6311e-05	0.00226373	12340000	12345000	10000	15000	9	1
Bomo_Chr21	12342500	BmNPV	62500	18	4.98782e-14	8.26753e-12	12340000	12345000	20000	65000	97	1
Bomo_Chr21	12342500	BmNPV	82500	16	6.94582e-12	1.04055e-09	12340000	12345000	75000	85000	27	1
Bomo_Chr21	12342500	BmNPV	112500	17	6.05488e-13	9.56178e-11	12340000	12345000	90000	130000	96	1
Bomo_Chr21	12432500	BmNPV	62500	8	0.000161941	0.0122869	12430000	12435000	60000	65000	8	1
Bomo_Chr21	12432500	BmNPV	122500	9	2.6311e-05	0.00226373	12430000	12435000	120000	125000	9	1
Bomo_Chr21	12442500	BmNPV	32500	9	2.6311e-05	0.00226373	12440000	12445000	30000	35000	9	1
Bomo_Chr21	12512500	BmNPV	77500	40	2.40829e-42	7.49264e-40	12510000	12515000	0	130000	698	1
Bomo_Chr21	12527500	BmNPV	82500	64	2.18023e-79	8.61935e-77	12525000	12530000	0	130000	1000	1
Bomo_Chr21	12647500	BmNPV	62500	8	0.000161941	0.0122869	12645000	12650000	60000	65000	8	1
Bomo_Chr21	12937500	BmNPV	42500	8	0.000161941	0.0122869	12935000	12940000	40000	45000	8	1
Bomo_Chr21	12937500	BmNPV	92500	14	7.60703e-10	1.01057e-07	12935000	12940000	90000	95000	14	1
Bomo_Chr21	12937500	BmNPV	127500	12	6.34341e-08	7.28518e-06	12935000	12940000	125000	130000	12	1
Bomo_Chr21	13097500	BmNPV	112500	8	0.000161941	0.0122869	13095000	13100000	110000	115000	8	1
Bomo_Chr21	13392500	BmNPV	2500	8	0.000161941	0.0122869	13390000	13395000	0	5000	8	1
Bomo_Chr21	13392500	BmNPV	22500	9	2.6311e-05	0.00226373	13390000	13395000	20000	25000	9	1
Bomo_Chr21	13392500	BmNPV	67500	11	5.16374e-07	5.44926e-05	13390000	13395000	65000	70000	11	1
Bomo_Chr21	13392500	BmNPV	92500	15	7.50423e-11	1.06161e-08	13390000	13395000	90000	95000	15	1
Bomo_Chr21	13392500	BmNPV	122500	10	3.86084e-06	0.000370259	13390000	13395000	120000	125000	10	1
Bomo_Chr21	13472500	BmNPV	122500	8	0.000161941	0.0122869	13470000	13475000	120000	125000	8	1
Bomo_Chr21	13932500	BmNPV	7500	10	3.86084e-06	0.000370259	13930000	13935000	5000	10000	10	1
Bomo_Chr21	13932500	BmNPV	42500	9	2.6311e-05	0.00226373	13930000	13935000	40000	45000	9	1
Bomo_Chr21	13932500	BmNPV	107500	8	0.000161941	0.0122869	13930000	13935000	105000	110000	8	1
Bomo_Chr21	14342500	BmNPV	112500	8	0.000161941	0.0122869	14340000	14345000	110000	115000	8	1
Bomo_Chr21	14582500	BmNPV	122500	8	0.000161941	0.0122869	14580000	14585000	120000	125000	8	1
Bomo_Chr21	14847500	BmNPV	42500	69	1.18418e-87	4.77835e-85	14845000	14855000	0	130000	1855	1
Bomo_Chr21	14902500	BmNPV	42500	56	1.60927e-66	6.06859e-64	14900000	14905000	0	130000	787	1
Bomo_Chr21	14927500	BmNPV	127500	58	1.07931e-69	4.12704e-67	14925000	14930000	0	130000	1006	1
Bomo_Chr21	14947500	BmNPV	122500	40	2.40829e-42	7.49264e-40	14945000	14950000	0	130000	656	1
Bomo_Chr22	322500	BmNPV	77500	8	0.000161941	0.0122869	320000	325000	75000	80000	8	1
Bomo_Chr22	332500	BmNPV	82500	39	6.47249e-41	1.97736e-38	330000	335000	0	130000	661	1
Bomo_Chr22	437500	BmNPV	62500	51	1.00795e-58	3.64036e-56	435000	440000	0	130000	833	1
Bomo_Chr22	487500	BmNPV	82500	44	3.62854e-48	1.20354e-45	485000	490000	0	130000	716	1
Bomo_Chr22	777500	BmNPV	122500	40	2.40829e-42	7.49264e-40	775000	780000	0	130000	617	1
Bomo_Chr22	797500	BmNPV	42500	46	3.88458e-51	1.32434e-48	795000	810000	0	130000	2034	1
Bomo_Chr22	822500	BmNPV	92500	42	3.09835e-45	9.96948e-43	820000	825000	0	130000	699	1
Bomo_Chr22	832500	BmNPV	112500	45	1.20034e-49	4.03745e-47	830000	835000	0	130000	754	1
Bomo_Chr22	842500	BmNPV	92500	47	1.23043e-52	4.24846e-50	840000	845000	0	130000	753	1
Bomo_Chr22	882500	BmNPV	122500	35	2.60532e-35	7.34252e-33	880000	885000	0	130000	611	1
Bomo_Chr22	892500	BmNPV	112500	38	1.69613e-39	5.08407e-37	890000	895000	0	130000	683	1
Bomo_Chr22	907500	BmNPV	92500	39	6.47249e-41	1.97736e-38	900000	910000	0	130000	1296	1
Bomo_Chr22	922500	BmNPV	122500	49	1.15952e-55	4.09994e-53	915000	930000	0	130000	2283	1
Bomo_Chr22	952500	BmNPV	82500	69	1.18418e-87	4.77835e-85	950000	960000	0	130000	1904	1
Bomo_Chr22	982500	BmNPV	82500	55	6.05227e-65	2.26411e-62	975000	1005000	0	130000	4541	1
Bomo_Chr22	1022500	BmNPV	42500	36	1.07686e-36	3.09954e-34	1020000	1025000	0	130000	592	1
Bomo_Chr22	1037500	BmNPV	92500	56	1.60927e-66	6.06859e-64	1030000	1040000	0	130000	1702	1
Bomo_Chr22	1092500	BmNPV	92500	51	1.00795e-58	3.64036e-56	1085000	1095000	0	130000	1519	1
Bomo_Chr22	1107500	BmNPV	127500	54	2.23558e-63	8.29362e-61	1100000	1120000	0	130000	2847	1
Bomo_Chr22	1147500	BmNPV	82500	49	1.15952e-55	4.09994e-53	1145000	1155000	0	130000	1508	1
Bomo_Chr22	1182500	BmNPV	82500	54	2.23558e-63	8.29362e-61	1180000	1185000	0	130000	724	1
Bomo_Chr22	1217500	BmNPV	62500	40	2.40829e-42	7.49264e-40	1215000	1220000	0	130000	629	1
Bomo_Chr22	1242500	BmNPV	122500	43	1.07255e-46	3.50685e-44	1240000	1245000	0	130000	660	1
Bomo_Chr22	1297500	BmNPV	92500	47	1.23043e-52	4.24846e-50	1295000	1300000	0	130000	665	1
Bomo_Chr22	1312500	BmNPV	112500	42	3.09835e-45	9.96948e-43	1310000	1315000	0	130000	657	1
Bomo_Chr22	1362500	BmNPV	42500	54	2.23558e-63	8.29362e-61	1360000	1365000	0	130000	879	1
Bomo_Chr22	1387500	BmNPV	92500	56	1.60927e-66	6.06859e-64	1370000	1395000	0	130000	3859	1
Bomo_Chr22	1422500	BmNPV	97500	48	3.81628e-54	1.33413e-51	1420000	1425000	0	130000	726	1
Bomo_Chr22	1442500	BmNPV	47500	40	2.40829e-42	7.49264e-40	1440000	1445000	0	130000	671	1
Bomo_Chr22	1452500	BmNPV	92500	51	1.00795e-58	3.64036e-56	1450000	1455000	0	130000	756	1
Bomo_Chr22	1462500	BmNPV	122500	39	6.47249e-41	1.97736e-38	1460000	1465000	0	130000	606	1
Bomo_Chr22	1472500	BmNPV	127500	48	3.81628e-54	1.33413e-51	1470000	1485000	0	130000	2160	1
Bomo_Chr22	1542500	BmNPV	82500	54	2.23558e-63	8.29362e-61	1540000	1545000	0	130000	928	1
Bomo_Chr22	1552500	BmNPV	122500	45	1.20034e-49	4.03745e-47	1550000	1555000	0	130000	714	1
Bomo_Chr22	1737500	BmNPV	92500	8	0.000161941	0.0122869	1735000	1740000	90000	95000	8	1
Bomo_Chr22	1782500	BmNPV	7500	14	7.60703e-10	1.01057e-07	1780000	1785000	0	10000	25	1
Bomo_Chr22	1782500	BmNPV	17500	13	7.20433e-09	8.93195e-07	1780000	1785000	15000	35000	49	1
Bomo_Chr22	1782500	BmNPV	42500	24	5.51438e-21	1.15536e-18	1780000	1785000	40000	70000	85	1
Bomo_Chr22	1782500	BmNPV	122500	24	5.51438e-21	1.15536e-18	1780000	1785000	75000	130000	173	1
Bomo_Chr22	1822500	BmNPV	7500	8	0.000161941	0.0122869	1820000	1825000	5000	10000	8	1
Bomo_Chr22	1822500	BmNPV	122500	8	0.000161941	0.0122869	1820000	1825000	120000	125000	8	1
Bomo_Chr22	2307500	BmNPV	42500	51	1.00795e-58	3.64036e-56	2300000	2310000	0	130000	1614	1
Bomo_Chr22	2347500	BmNPV	42500	66	1.12708e-82	4.49776e-80	2340000	2350000	0	130000	1816	1
Bomo_Chr22	2357500	BmNPV	77500	52	2.88604e-60	1.05177e-57	2355000	2360000	0	130000	928	1
Bomo_Chr22	2387500	BmNPV	42500	55	6.05227e-65	2.26411e-62	2385000	2390000	0	130000	876	1
Bomo_Chr22	2412500	BmNPV	122500	80	2.26406e-106	9.39487e-104	2410000	2425000	0	130000	3280	1
Bomo_Chr22	2432500	BmNPV	42500	41	8.74266e-44	2.76809e-41	2430000	2435000	0	130000	661	1
Bomo_Chr22	2812500	BmNPV	122500	40	2.40829e-42	7.49264e-40	2810000	2815000	0	130000	502	1
Bomo_Chr22	2982500	BmNPV	127500	48	3.81628e-54	1.33413e-51	2980000	2985000	0	130000	760	1
Bomo_Chr22	3132500	BmNPV	2500	13	7.20433e-09	8.93195e-07	3130000	3135000	0	15000	32	1
Bomo_Chr22	3132500	BmNPV	47500	23	8.90719e-20	1.80413e-17	3130000	3135000	20000	65000	143	1
Bomo_Chr22	3132500	BmNPV	122500	23	8.90719e-20	1.80413e-17	3130000	3135000	70000	130000	175	1
Bomo_Chr22	3642500	BmNPV	77500	10	3.86084e-06	0.000370259	3640000	3645000	75000	80000	10	1
Bomo_Chr22	3667500	BmNPV	82500	8	0.000161941	0.0122869	3665000	3670000	80000	85000	8	1
Bomo_Chr22	4047500	BmNPV	2500	15	7.50423e-11	1.06161e-08	4045000	4050000	0	10000	28	1
Bomo_Chr22	4047500	BmNPV	22500	13	7.20433e-09	8.93195e-07	4045000	4050000	20000	25000	13	1
Bomo_Chr22	4047500	BmNPV	32500	20	2.88986e-16	5.22248e-14	4045000	4050000	30000	35000	20	1
Bomo_Chr22	4047500	BmNPV	42500	14	7.60703e-10	1.01057e-07	4045000	4050000	40000	55000	38	1
Bomo_Chr22	4047500	BmNPV	77500	22	1.37912e-18	2.69605e-16	4045000	4050000	60000	85000	73	1
Bomo_Chr22	4047500	BmNPV	112500	21	2.04303e-17	3.84409e-15	4045000	4050000	90000	130000	121	1
Bomo_Chr22	4747500	BmNPV	82500	8	0.000161941	0.0122869	4745000	4750000	80000	85000	8	1
Bomo_Chr22	4747500	BmNPV	92500	12	6.34341e-08	7.28518e-06	4745000	4750000	90000	95000	12	1
Bomo_Chr22	4747500	BmNPV	102500	8	0.000161941	0.0122869	4745000	4750000	100000	105000	8	1
Bomo_Chr22	5092500	BmNPV	47500	11	5.16374e-07	5.44926e-05	5090000	5095000	45000	50000	11	1
Bomo_Chr22	6422500	BmNPV	62500	8	0.000161941	0.0122869	6420000	6425000	60000	65000	8	1
Bomo_Chr22	6612500	BmNPV	7500	21	2.04303e-17	3.84409e-15	6610000	6615000	0	15000	44	1
Bomo_Chr22	6612500	BmNPV	27500	26	1.87403e-23	4.18485e-21	6610000	6615000	20000	35000	64	1
Bomo_Chr22	6612500	BmNPV	102500	25	3.27804e-22	7.09219e-20	6610000	6615000	40000	115000	215	1
Bomo_Chr22	6612500	BmNPV	122500	29	2.80973e-27	6.84023e-25	6610000	6615000	120000	130000	46	1
Bomo_Chr22	6627500	BmNPV	92500	37	4.331e-38	1.27326e-35	6625000	6630000	0	130000	600	1
Bomo_Chr22	7027500	BmNPV	92500	9	2.6311e-05	0.00226373	7025000	7030000	90000	95000	9	1
Bomo_Chr22	7092500	BmNPV	2500	9	2.6311e-05	0.00226373	7090000	7095000	0	10000	17	1
Bomo_Chr22	7092500	BmNPV	42500	8	0.000161941	0.0122869	7090000	7095000	40000	45000	8	1
Bomo_Chr22	7092500	BmNPV	62500	8	0.000161941	0.0122869	7090000	7095000	60000	65000	8	1
Bomo_Chr22	7112500	BmNPV	42500	9	2.6311e-05	0.00226373	7110000	7115000	40000	45000	9	1
Bomo_Chr22	7532500	BmNPV	27500	9	2.6311e-05	0.00226373	7530000	7535000	25000	30000	9	1
Bomo_Chr22	7532500	BmNPV	42500	12	6.34341e-08	7.28518e-06	7530000	7535000	40000	50000	24	1
Bomo_Chr22	7532500	BmNPV	62500	10	3.86084e-06	0.000370259	7530000	7535000	60000	65000	10	1
Bomo_Chr22	7532500	BmNPV	82500	10	3.86084e-06	0.000370259	7530000	7535000	80000	85000	10	1
Bomo_Chr22	7532500	BmNPV	112500	9	2.6311e-05	0.00226373	7530000	7535000	105000	130000	42	1
Bomo_Chr22	7942500	BmNPV	122500	58	1.07931e-69	4.12704e-67	7940000	7945000	0	130000	896	1
Bomo_Chr22	7967500	BmNPV	122500	73	2.23009e-94	9.112e-92	7960000	7970000	0	130000	2217	1
Bomo_Chr22	8127500	BmNPV	97500	8	0.000161941	0.0122869	8125000	8130000	95000	105000	16	1
Bomo_Chr22	8832500	BmNPV	27500	8	0.000161941	0.0122869	8830000	8835000	25000	30000	8	1
Bomo_Chr22	9022500	BmNPV	122500	41	8.74266e-44	2.76809e-41	9020000	9025000	0	130000	673	1
Bomo_Chr22	9302500	BmNPV	12500	8	0.000161941	0.0122869	9300000	9305000	10000	15000	8	1
Bomo_Chr22	9302500	BmNPV	77500	9	2.6311e-05	0.00226373	9300000	9305000	75000	80000	9	1
Bomo_Chr22	10722500	BmNPV	122500	49	1.15952e-55	4.09994e-53	10720000	10725000	0	130000	765	1
Bomo_Chr22	11387500	BmNPV	82500	8	0.000161941	0.0122869	11385000	11390000	80000	85000	8	1
Bomo_Chr22	11812500	BmNPV	92500	10	3.86084e-06	0.000370259	11810000	11815000	90000	95000	10	1
Bomo_Chr22	12617500	BmNPV	32500	35	2.60532e-35	7.34252e-33	12615000	12620000	0	130000	642	1
Bomo_Chr22	12647500	BmNPV	47500	8	0.000161941	0.0122869	12645000	12650000	45000	50000	8	1
Bomo_Chr22	12647500	BmNPV	62500	9	2.6311e-05	0.00226373	12645000	12650000	60000	65000	9	1
Bomo_Chr22	12647500	BmNPV	112500	10	3.86084e-06	0.000370259	12645000	12650000	110000	115000	10	1
Bomo_Chr22	12752500	BmNPV	77500	9	2.6311e-05	0.00226373	12750000	12755000	75000	80000	9	1
Bomo_Chr22	13197500	BmNPV	92500	31	6.68321e-30	1.71471e-27	13195000	13200000	0	130000	508	1
Bomo_Chr22	13237500	BmNPV	92500	76	1.74658e-99	7.18782e-97	13235000	13240000	0	130000	1119	1
Bomo_Chr22	13412500	BmNPV	22500	8	0.000161941	0.0122869	13410000	13415000	20000	25000	8	1
Bomo_Chr22	13497500	BmNPV	22500	8	0.000161941	0.0122869	13495000	13500000	20000	25000	8	1
Bomo_Chr22	13497500	BmNPV	42500	9	2.6311e-05	0.00226373	13495000	13500000	40000	45000	9	1
Bomo_Chr22	13857500	BmNPV	12500	8	0.000161941	0.0122869	13855000	13860000	10000	15000	8	1
Bomo_Chr22	13857500	BmNPV	27500	11	5.16374e-07	5.44926e-05	13855000	13860000	20000	30000	19	1
Bomo_Chr22	13857500	BmNPV	42500	8	0.000161941	0.0122869	13855000	13860000	40000	45000	8	1
Bomo_Chr22	13857500	BmNPV	77500	8	0.000161941	0.0122869	13855000	13860000	75000	80000	8	1
Bomo_Chr22	13857500	BmNPV	97500	10	3.86084e-06	0.000370259	13855000	13860000	90000	100000	18	1
Bomo_Chr22	13857500	BmNPV	117500	8	0.000161941	0.0122869	13855000	13860000	110000	120000	16	1
Bomo_Chr22	13932500	BmNPV	7500	10	3.86084e-06	0.000370259	13930000	13935000	5000	10000	10	1
Bomo_Chr22	13932500	BmNPV	27500	8	0.000161941	0.0122869	13930000	13935000	25000	30000	8	1
Bomo_Chr22	13932500	BmNPV	42500	8	0.000161941	0.0122869	13930000	13935000	40000	45000	8	1
Bomo_Chr22	15007500	BmNPV	82500	55	6.05227e-65	2.26411e-62	15000000	15020000	0	130000	3365	1
Bomo_Chr22	15032500	BmNPV	122500	52	2.88604e-60	1.05177e-57	15030000	15035000	0	130000	881	1
Bomo_Chr22	15057500	BmNPV	92500	68	5.48653e-86	2.2059e-83	15045000	15060000	0	130000	2727	1
Bomo_Chr22	15072500	BmNPV	122500	75	8.91267e-98	3.65966e-95	15070000	15080000	0	130000	2483	1
Bomo_Chr22	15097500	BmNPV	82500	54	2.23558e-63	8.29362e-61	15095000	15100000	0	130000	877	1
Bomo_Chr22	15127500	BmNPV	62500	66	1.12708e-82	4.49776e-80	15115000	15130000	0	130000	3088	1
Bomo_Chr22	15227500	BmNPV	92500	73	2.23009e-94	9.112e-92	15220000	15230000	0	130000	2076	1
Bomo_Chr22	15237500	BmNPV	92500	73	2.23009e-94	9.112e-92	15235000	15240000	0	130000	1087	1
Bomo_Chr22	15252500	BmNPV	92500	60	6.76062e-73	2.61759e-70	15250000	15260000	0	130000	1922	1
Bomo_Chr22	15332500	BmNPV	82500	57	4.20397e-68	1.59708e-65	15330000	15335000	0	130000	923	1
Bomo_Chr22	15967500	BmNPV	27500	8	0.000161941	0.0122869	15965000	15970000	25000	30000	8	1
Bomo_Chr22	16222500	BmNPV	122500	38	1.69613e-39	5.08407e-37	16220000	16225000	0	130000	725	1
Bomo_Chr22	16367500	BmNPV	12500	19	3.89442e-15	6.7524e-13	16365000	16370000	0	15000	48	1
Bomo_Chr22	16367500	BmNPV	102500	31	6.68321e-30	1.71471e-27	16365000	16370000	25000	130000	407	1
Bomo_Chr22	16382500	BmNPV	112500	40	2.40829e-42	7.49264e-40	16380000	16385000	0	130000	676	1
Bomo_Chr22	16947500	BmNPV	82500	75	8.91267e-98	3.65966e-95	16945000	16950000	0	130000	1101	1
Bomo_Chr22	16972500	BmNPV	32500	41	8.74266e-44	2.76809e-41	16970000	16975000	0	35000	164	1
Bomo_Chr22	16972500	BmNPV	62500	46	3.88458e-51	1.32434e-48	16970000	16975000	40000	130000	484	1
Bomo_Chr22	17007500	BmNPV	47500	24	5.51438e-21	1.15536e-18	17005000	17010000	0	85000	289	1
Bomo_Chr22	17007500	BmNPV	92500	33	1.40054e-32	3.77157e-30	17005000	17010000	90000	130000	183	1
Bomo_Chr22	17102500	BmNPV	97500	8	0.000161941	0.0122869	17100000	17105000	95000	100000	8	1
Bomo_Chr22	17357500	BmNPV	127500	8	0.000161941	0.0122869	17355000	17360000	125000	130000	8	1
Bomo_Chr23	162500	BmNPV	77500	9	2.6311e-05	0.00226373	160000	165000	75000	80000	9	1
Bomo_Chr23	307500	BmNPV	2500	8	0.000161941	0.0122869	305000	310000	0	5000	8	1
Bomo_Chr23	772500	BmNPV	42500	8	0.000161941	0.0122869	770000	775000	40000	45000	8	1
Bomo_Chr23	817500	BmNPV	42500	8	0.000161941	0.0122869	815000	820000	40000	45000	8	1
Bomo_Chr23	892500	BmNPV	77500	8	0.000161941	0.0122869	890000	895000	75000	80000	8	1
Bomo_Chr23	1097500	BmNPV	62500	8	0.000161941	0.0122869	1095000	1100000	60000	65000	8	1
Bomo_Chr23	1512500	BmNPV	22500	8	0.000161941	0.0122869	1510000	1515000	20000	25000	8	1
Bomo_Chr23	1512500	BmNPV	47500	10	3.86084e-06	0.000370259	1510000	1515000	45000	50000	10	1
Bomo_Chr23	1512500	BmNPV	62500	10	3.86084e-06	0.000370259	1510000	1515000	55000	65000	19	1
Bomo_Chr23	1512500	BmNPV	82500	13	7.20433e-09	8.93195e-07	1510000	1515000	75000	85000	25	1
Bomo_Chr23	1512500	BmNPV	92500	8	0.000161941	0.0122869	1510000	1515000	90000	95000	8	1
Bomo_Chr23	1512500	BmNPV	122500	14	7.60703e-10	1.01057e-07	1510000	1515000	120000	125000	14	1
Bomo_Chr23	1842500	BmNPV	97500	8	0.000161941	0.0122869	1840000	1845000	95000	100000	8	1
Bomo_Chr23	1842500	BmNPV	122500	8	0.000161941	0.0122869	1840000	1845000	120000	125000	8	1
Bomo_Chr23	2097500	BmNPV	77500	8	0.000161941	0.0122869	2095000	2100000	75000	80000	8	1
Bomo_Chr23	2402500	BmNPV	47500	8	0.000161941	0.0122869	2400000	2405000	45000	50000	8	1
Bomo_Chr23	2977500	BmNPV	47500	9	2.6311e-05	0.00226373	2975000	2980000	45000	50000	9	1
Bomo_Chr23	3327500	BmNPV	92500	8	0.000161941	0.0122869	3325000	3330000	90000	95000	8	1
Bomo_Chr23	3352500	BmNPV	42500	58	1.07931e-69	4.12704e-67	3350000	3355000	0	130000	820	1
Bomo_Chr23	3622500	BmNPV	82500	8	0.000161941	0.0122869	3620000	3625000	80000	85000	8	1
Bomo_Chr23	3992500	BmNPV	127500	56	1.60927e-66	6.06859e-64	3990000	3995000	0	130000	895	1
Bomo_Chr23	4252500	BmNPV	92500	8	0.000161941	0.0122869	4250000	4255000	90000	95000	8	1
Bomo_Chr23	4447500	BmNPV	37500	8	0.000161941	0.0122869	4445000	4450000	35000	40000	8	1
Bomo_Chr23	4837500	BmNPV	97500	8	0.000161941	0.0122869	4835000	4840000	95000	100000	8	1
Bomo_Chr23	5412500	BmNPV	42500	8	0.000161941	0.0122869	5410000	5415000	40000	45000	8	1
Bomo_Chr23	7147500	BmNPV	42500	44	3.62854e-48	1.20354e-45	7145000	7150000	0	130000	770	1
Bomo_Chr23	7372500	BmNPV	62500	9	2.6311e-05	0.00226373	7370000	7375000	60000	65000	9	1
Bomo_Chr23	7372500	BmNPV	127500	8	0.000161941	0.0122869	7370000	7375000	125000	130000	8	1
Bomo_Chr23	7527500	BmNPV	42500	8	0.000161941	0.0122869	7525000	7530000	40000	45000	8	1
Bomo_Chr23	7527500	BmNPV	82500	8	0.000161941	0.0122869	7525000	7530000	80000	85000	8	1
Bomo_Chr23	8137500	BmNPV	122500	10	3.86084e-06	0.000370259	8135000	8140000	120000	125000	10	1
Bomo_Chr23	8247500	BmNPV	92500	36	1.07686e-36	3.09954e-34	8245000	8250000	0	130000	614	1
Bomo_Chr23	8277500	BmNPV	122500	53	8.10776e-62	2.98203e-59	8275000	8280000	0	130000	833	1
Bomo_Chr23	8297500	BmNPV	42500	50	3.45266e-57	1.23438e-54	8295000	8300000	0	130000	826	1
Bomo_Chr23	8357500	BmNPV	42500	8	0.000161941	0.0122869	8355000	8360000	40000	45000	8	1
Bomo_Chr23	8357500	BmNPV	62500	8	0.000161941	0.0122869	8355000	8360000	60000	65000	8	1
Bomo_Chr23	8357500	BmNPV	92500	10	3.86084e-06	0.000370259	8355000	8360000	90000	95000	10	1
Bomo_Chr23	8692500	BmNPV	32500	8	0.000161941	0.0122869	8690000	8695000	30000	35000	8	1
Bomo_Chr23	8692500	BmNPV	92500	12	6.34341e-08	7.28518e-06	8690000	8695000	90000	95000	12	1
Bomo_Chr23	8692500	BmNPV	117500	9	2.6311e-05	0.00226373	8690000	8695000	115000	130000	27	1
Bomo_Chr23	9702500	BmNPV	82500	8	0.000161941	0.0122869	9700000	9705000	80000	85000	8	1
Bomo_Chr23	9847500	BmNPV	82500	11	5.16374e-07	5.44926e-05	9845000	9850000	80000	85000	11	1
Bomo_Chr23	10047500	BmNPV	7500	8	0.000161941	0.0122869	10045000	10050000	5000	10000	8	1
Bomo_Chr23	10047500	BmNPV	82500	8	0.000161941	0.0122869	10045000	10050000	80000	85000	8	1
Bomo_Chr23	10047500	BmNPV	112500	8	0.000161941	0.0122869	10045000	10050000	110000	115000	8	1
Bomo_Chr23	12367500	BmNPV	42500	8	0.000161941	0.0122869	12365000	12370000	40000	45000	8	1
Bomo_Chr23	12472500	BmNPV	42500	8	0.000161941	0.0122869	12470000	12475000	40000	45000	8	1
Bomo_Chr23	12472500	BmNPV	107500	9	2.6311e-05	0.00226373	12470000	12475000	105000	110000	9	1
Bomo_Chr23	12687500	BmNPV	122500	52	2.88604e-60	1.05177e-57	12685000	12690000	0	130000	815	1
Bomo_Chr23	12732500	BmNPV	2500	21	2.04303e-17	3.84409e-15	12730000	12735000	0	15000	52	1
Bomo_Chr23	12732500	BmNPV	62500	37	4.331e-38	1.27326e-35	12730000	12735000	20000	85000	281	1
Bomo_Chr23	12732500	BmNPV	92500	34	6.12853e-34	1.68891e-31	12730000	12735000	90000	130000	195	1
Bomo_Chr23	13727500	BmNPV	112500	8	0.000161941	0.0122869	13725000	13730000	110000	115000	8	1
Bomo_Chr23	14497500	BmNPV	2500	9	2.6311e-05	0.00226373	14495000	14500000	0	5000	9	1
Bomo_Chr23	14497500	BmNPV	42500	8	0.000161941	0.0122869	14495000	14500000	40000	45000	8	1
Bomo_Chr23	14497500	BmNPV	62500	12	6.34341e-08	7.28518e-06	14495000	14500000	60000	65000	12	1
Bomo_Chr23	14497500	BmNPV	82500	15	7.50423e-11	1.06161e-08	14495000	14500000	75000	85000	27	1
Bomo_Chr23	14497500	BmNPV	97500	8	0.000161941	0.0122869	14495000	14500000	95000	105000	16	1
Bomo_Chr23	14992500	BmNPV	92500	37	4.331e-38	1.27326e-35	14990000	14995000	0	130000	513	1
Bomo_Chr23	15077500	BmNPV	122500	60	6.76062e-73	2.61759e-70	15075000	15080000	0	130000	924	1
Bomo_Chr23	16162500	BmNPV	122500	8	0.000161941	0.0122869	16160000	16165000	120000	125000	8	1
Bomo_Chr23	16707500	BmNPV	7500	8	0.000161941	0.0122869	16705000	16710000	5000	10000	8	1
Bomo_Chr23	17247500	BmNPV	2500	14	7.60703e-10	1.01057e-07	17245000	17250000	0	5000	14	1
Bomo_Chr23	17247500	BmNPV	47500	18	4.98782e-14	8.26753e-12	17245000	17250000	15000	85000	169	1
Bomo_Chr23	17247500	BmNPV	92500	12	6.34341e-08	7.28518e-06	17245000	17250000	90000	95000	12	1
Bomo_Chr23	17247500	BmNPV	127500	16	6.94582e-12	1.04055e-09	17245000	17250000	100000	130000	71	1
Bomo_Chr23	17282500	BmNPV	42500	23	8.90719e-20	1.80413e-17	17280000	17285000	0	50000	142	1
Bomo_Chr23	17282500	BmNPV	62500	22	1.37912e-18	2.69605e-16	17280000	17285000	55000	65000	30	1
Bomo_Chr23	17282500	BmNPV	92500	31	6.68321e-30	1.71471e-27	17280000	17285000	70000	130000	206	1
Bomo_Chr23	17347500	BmNPV	97500	40	2.40829e-42	7.49264e-40	17345000	17350000	0	130000	678	1
Bomo_Chr23	17367500	BmNPV	92500	77	3.37827e-101	1.39372e-98	17365000	17370000	0	130000	1179	1
Bomo_Chr23	17377500	BmNPV	42500	56	1.60927e-66	6.06859e-64	17375000	17380000	0	130000	873	1
Bomo_Chr23	17392500	BmNPV	42500	53	8.10776e-62	2.98203e-59	17385000	17395000	0	130000	1693	1
Bomo_Chr23	17407500	BmNPV	42500	69	1.18418e-87	4.77835e-85	17400000	17415000	0	130000	2793	1
Bomo_Chr23	17427500	BmNPV	92500	54	2.23558e-63	8.29362e-61	17425000	17430000	0	130000	807	1
Bomo_Chr23	17527500	BmNPV	122500	60	6.76062e-73	2.61759e-70	17505000	17530000	0	130000	4190	1
Bomo_Chr23	17832500	BmNPV	42500	13	7.20433e-09	8.93195e-07	17830000	17835000	40000	45000	13	1
Bomo_Chr23	17887500	BmNPV	107500	35	2.60532e-35	7.34252e-33	17885000	17890000	0	130000	616	1
Bomo_Chr23	17967500	BmNPV	27500	9	2.6311e-05	0.00226373	17965000	17970000	25000	30000	9	1
Bomo_Chr23	17982500	BmNPV	97500	9	2.6311e-05	0.00226373	17980000	17985000	95000	100000	9	1
Bomo_Chr23	18162500	BmNPV	2500	9	2.6311e-05	0.00226373	18160000	18165000	0	5000	9	1
Bomo_Chr23	18212500	BmNPV	117500	9	2.6311e-05	0.00226373	18210000	18215000	115000	120000	9	1
Bomo_Chr23	18327500	BmNPV	42500	8	0.000161941	0.0122869	18325000	18330000	40000	45000	8	1
Bomo_Chr23	18602500	BmNPV	7500	8	0.000161941	0.0122869	18600000	18605000	5000	10000	8	1
Bomo_Chr23	18842500	BmNPV	122500	8	0.000161941	0.0122869	18840000	18845000	120000	125000	8	1
Bomo_Chr23	18947500	BmNPV	112500	8	0.000161941	0.0122869	18945000	18950000	110000	115000	8	1
Bomo_Chr23	19542500	BmNPV	92500	11	5.16374e-07	5.44926e-05	19540000	19545000	90000	95000	11	1
Bomo_Chr23	19852500	BmNPV	32500	10	3.86084e-06	0.000370259	19850000	19855000	30000	35000	10	1
Bomo_Chr23	19852500	BmNPV	92500	8	0.000161941	0.0122869	19850000	19855000	90000	95000	8	1
Bomo_Chr23	20252500	BmNPV	22500	8	0.000161941	0.0122869	20250000	20255000	20000	25000	8	1
Bomo_Chr23	20252500	BmNPV	77500	9	2.6311e-05	0.00226373	20250000	20255000	75000	80000	9	1
Bomo_Chr23	20252500	BmNPV	92500	11	5.16374e-07	5.44926e-05	20250000	20255000	90000	100000	20	1
Bomo_Chr23	20252500	BmNPV	127500	8	0.000161941	0.0122869	20250000	20255000	125000	130000	8	1
Bomo_Chr23	20272500	BmNPV	122500	8	0.000161941	0.0122869	20270000	20275000	120000	125000	8	1
Bomo_Chr23	20362500	BmNPV	112500	11	5.16374e-07	5.44926e-05	20360000	20365000	110000	115000	11	1
Bomo_Chr23	20362500	BmNPV	122500	9	2.6311e-05	0.00226373	20360000	20365000	120000	125000	9	1
Bomo_Chr23	20557500	BmNPV	47500	53	8.10776e-62	2.98203e-59	20555000	20560000	0	130000	784	1
Bomo_Chr23	20857500	BmNPV	122500	10	3.86084e-06	0.000370259	20855000	20860000	120000	125000	10	1
Bomo_Chr23	21447500	BmNPV	42500	8	0.000161941	0.0122869	21445000	21450000	40000	45000	8	1
Bomo_Chr23	21447500	BmNPV	82500	9	2.6311e-05	0.00226373	21445000	21450000	80000	85000	9	1
Bomo_Chr24	37500	BmNPV	42500	9	2.6311e-05	0.00226373	35000	40000	40000	45000	9	1
Bomo_Chr24	37500	BmNPV	92500	10	3.86084e-06	0.000370259	35000	40000	90000	95000	10	1
Bomo_Chr24	527500	BmNPV	62500	9	2.6311e-05	0.00226373	525000	530000	60000	65000	9	1
Bomo_Chr24	527500	BmNPV	82500	8	0.000161941	0.0122869	525000	530000	80000	85000	8	1
Bomo_Chr24	1237500	BmNPV	47500	9	2.6311e-05	0.00226373	1235000	1240000	45000	50000	9	1
Bomo_Chr24	1652500	BmNPV	92500	8	0.000161941	0.0122869	1650000	1655000	90000	95000	8	1
Bomo_Chr24	1787500	BmNPV	27500	9	2.6311e-05	0.00226373	1785000	1790000	25000	30000	9	1
Bomo_Chr24	1787500	BmNPV	92500	8	0.000161941	0.0122869	1785000	1790000	90000	95000	8	1
Bomo_Chr24	2392500	BmNPV	102500	8	0.000161941	0.0122869	2390000	2395000	100000	105000	8	1
Bomo_Chr24	2447500	BmNPV	42500	10	3.86084e-06	0.000370259	2445000	2450000	40000	45000	10	1
Bomo_Chr24	2447500	BmNPV	72500	9	2.6311e-05	0.00226373	2445000	2450000	70000	75000	9	1
Bomo_Chr24	2572500	BmNPV	92500	80	2.26406e-106	9.39487e-104	2570000	2575000	0	130000	1258	1
Bomo_Chr24	2712500	BmNPV	7500	9	2.6311e-05	0.00226373	2710000	2715000	5000	10000	9	1
Bomo_Chr24	2807500	BmNPV	2500	8	0.000161941	0.0122869	2805000	2810000	0	5000	8	1
Bomo_Chr24	2807500	BmNPV	62500	8	0.000161941	0.0122869	2805000	2810000	60000	65000	8	1
Bomo_Chr24	2812500	BmNPV	112500	10	3.86084e-06	0.000370259	2805000	2815000	105000	120000	27	0.5
Bomo_Chr24	2827500	BmNPV	62500	9	2.6311e-05	0.00226373	2825000	2830000	60000	65000	9	1
Bomo_Chr24	3392500	BmNPV	62500	8	0.000161941	0.0122869	3390000	3395000	60000	65000	8	1
Bomo_Chr24	3682500	BmNPV	32500	9	2.6311e-05	0.00226373	3680000	3685000	30000	35000	9	1
Bomo_Chr24	3912500	BmNPV	47500	8	0.000161941	0.0122869	3910000	3915000	45000	50000	8	1
Bomo_Chr24	4977500	BmNPV	82500	182	1.09947e-303	4.7212e-301	4950000	4995000	0	130000	17864	1
Bomo_Chr24	5117500	BmNPV	2500	8	0.000161941	0.0122869	5115000	5120000	0	5000	8	1
Bomo_Chr24	5117500	BmNPV	22500	8	0.000161941	0.0122869	5115000	5120000	20000	25000	8	1
Bomo_Chr24	5192500	BmNPV	97500	8	0.000161941	0.0122869	5190000	5195000	95000	100000	8	1
Bomo_Chr24	5197500	BmNPV	52500	8	0.000161941	0.0122869	5195000	5200000	50000	55000	8	1
Bomo_Chr24	5197500	BmNPV	77500	11	5.16374e-07	5.44926e-05	5190000	5200000	75000	85000	20	0.5
Bomo_Chr24	5207500	BmNPV	92500	8	0.000161941	0.0122869	5205000	5210000	90000	95000	8	1
Bomo_Chr24	5452500	BmNPV	92500	63	9.3699e-78	3.68737e-75	5450000	5460000	0	130000	1896	1
Bomo_Chr24	5477500	BmNPV	82500	8	0.000161941	0.0122869	5475000	5480000	80000	85000	8	1
Bomo_Chr24	5582500	BmNPV	72500	8	0.000161941	0.0122869	5580000	5585000	70000	75000	8	1
Bomo_Chr24	5602500	BmNPV	62500	74	4.48826e-96	1.83881e-93	5600000	5610000	0	130000	2270	1
Bomo_Chr24	5622500	BmNPV	42500	85	4.21573e-115	1.76304e-112	5615000	5625000	0	130000	1985	1
Bomo_Chr24	5637500	BmNPV	62500	79	1.21611e-104	5.03671e-102	5630000	5645000	0	130000	3160	1
Bomo_Chr24	5672500	BmNPV	42500	57	4.20397e-68	1.59708e-65	5665000	5675000	0	130000	1853	1
Bomo_Chr24	5717500	BmNPV	42500	59	2.72403e-71	1.04835e-68	5715000	5720000	0	130000	1027	1
Bomo_Chr24	5747500	BmNPV	42500	52	2.88604e-60	1.05177e-57	5745000	5750000	0	130000	921	1
Bomo_Chr24	5767500	BmNPV	127500	52	2.88604e-60	1.05177e-57	5760000	5770000	0	130000	1568	1
Bomo_Chr24	5817500	BmNPV	92500	56	1.60927e-66	6.06859e-64	5815000	5820000	0	130000	929	1
Bomo_Chr24	5842500	BmNPV	92500	70	2.51938e-89	1.0198e-86	5835000	5845000	0	130000	1938	1
Bomo_Chr24	5852500	BmNPV	127500	57	4.20397e-68	1.59708e-65	5850000	5855000	0	130000	1042	1
Bomo_Chr24	5882500	BmNPV	82500	52	2.88604e-60	1.05177e-57	5880000	5885000	0	130000	862	1
Bomo_Chr24	5917500	BmNPV	47500	8	0.000161941	0.0122869	5915000	5920000	45000	50000	8	1
Bomo_Chr24	5917500	BmNPV	82500	8	0.000161941	0.0122869	5915000	5920000	80000	85000	8	1
Bomo_Chr24	5997500	BmNPV	97500	8	0.000161941	0.0122869	5995000	6000000	95000	100000	8	1
Bomo_Chr24	5997500	BmNPV	107500	8	0.000161941	0.0122869	5995000	6000000	105000	110000	8	1
Bomo_Chr24	6007500	BmNPV	82500	174	4.67005e-287	2.00472e-284	6005000	6020000	0	130000	4189	0.666667
Bomo_Chr24	6042500	BmNPV	122500	9	2.6311e-05	0.00226373	6040000	6045000	120000	125000	9	1
Bomo_Chr24	6962500	BmNPV	42500	8	0.000161941	0.0122869	6960000	6965000	40000	45000	8	1
Bomo_Chr24	6967500	BmNPV	92500	9	2.6311e-05	0.00226373	6965000	6970000	90000	100000	17	1
Bomo_Chr24	6972500	BmNPV	107500	8	0.000161941	0.0122869	6970000	6975000	105000	110000	8	1
Bomo_Chr24	6987500	BmNPV	32500	8	0.000161941	0.0122869	6985000	6990000	30000	35000	8	1
Bomo_Chr24	6987500	BmNPV	52500	8	0.000161941	0.0122869	6985000	6990000	50000	55000	8	1
Bomo_Chr24	7547500	BmNPV	47500	8	0.000161941	0.0122869	7545000	7550000	45000	50000	8	1
Bomo_Chr24	7867500	BmNPV	47500	8	0.000161941	0.0122869	7865000	7870000	45000	50000	8	1
Bomo_Chr24	8147500	BmNPV	62500	8	0.000161941	0.0122869	8145000	8150000	60000	65000	8	1
Bomo_Chr24	8352500	BmNPV	97500	8	0.000161941	0.0122869	8350000	8355000	95000	100000	8	1
Bomo_Chr24	8507500	BmNPV	62500	8	0.000161941	0.0122869	8505000	8510000	60000	65000	8	1
Bomo_Chr24	8532500	BmNPV	82500	9	2.6311e-05	0.00226373	8530000	8535000	80000	85000	9	1
Bomo_Chr24	8672500	BmNPV	42500	94	3.94032e-131	1.663e-128	8670000	8680000	0	130000	1689	0.807692
Bomo_Chr24	8687500	BmNPV	92500	59	2.72403e-71	1.04835e-68	8685000	8690000	0	130000	1036	1
Bomo_Chr24	8757500	BmNPV	42500	8	0.000161941	0.0122869	8755000	8760000	40000	45000	8	1
Bomo_Chr24	8757500	BmNPV	62500	10	3.86084e-06	0.000370259	8755000	8760000	60000	65000	10	1
Bomo_Chr24	8757500	BmNPV	82500	8	0.000161941	0.0122869	8755000	8760000	80000	85000	8	1
Bomo_Chr24	8757500	BmNPV	92500	8	0.000161941	0.0122869	8755000	8760000	90000	95000	8	1
Bomo_Chr24	8757500	BmNPV	102500	8	0.000161941	0.0122869	8755000	8760000	100000	105000	8	1
Bomo_Chr24	8777500	BmNPV	42500	8	0.000161941	0.0122869	8775000	8780000	40000	45000	8	1
Bomo_Chr24	8777500	BmNPV	77500	9	2.6311e-05	0.00226373	8775000	8780000	75000	80000	9	1
Bomo_Chr24	8777500	BmNPV	112500	8	0.000161941	0.0122869	8775000	8780000	110000	115000	8	1
Bomo_Chr24	8777500	BmNPV	127500	8	0.000161941	0.0122869	8775000	8780000	125000	130000	8	1
Bomo_Chr24	8802500	BmNPV	52500	9	2.6311e-05	0.00226373	8800000	8805000	50000	55000	9	1
Bomo_Chr24	8802500	BmNPV	62500	10	3.86084e-06	0.000370259	8800000	8805000	60000	65000	10	1
Bomo_Chr24	9032500	BmNPV	122500	52	2.88604e-60	1.05177e-57	9030000	9035000	0	130000	773	1
Bomo_Chr24	9112500	BmNPV	47500	9	2.6311e-05	0.00226373	9110000	9115000	40000	50000	18	1
Bomo_Chr24	9292500	BmNPV	97500	8	0.000161941	0.0122869	9290000	9295000	95000	100000	8	1
Bomo_Chr24	9487500	BmNPV	77500	8	0.000161941	0.0122869	9485000	9490000	75000	80000	8	1
Bomo_Chr24	9487500	BmNPV	122500	8	0.000161941	0.0122869	9485000	9490000	120000	125000	8	1
Bomo_Chr24	9937500	BmNPV	42500	8	0.000161941	0.0122869	9935000	9940000	40000	45000	8	1
Bomo_Chr24	10377500	BmNPV	62500	8	0.000161941	0.0122869	10375000	10380000	60000	65000	8	1
Bomo_Chr24	10507500	BmNPV	27500	9	2.6311e-05	0.00226373	10505000	10510000	25000	30000	9	1
Bomo_Chr24	10507500	BmNPV	92500	8	0.000161941	0.0122869	10505000	10510000	90000	95000	8	1
Bomo_Chr24	10757500	BmNPV	22500	8	0.000161941	0.0122869	10755000	10760000	20000	25000	8	1
Bomo_Chr24	10822500	BmNPV	47500	11	5.16374e-07	5.44926e-05	10820000	10825000	40000	50000	20	1
Bomo_Chr24	10822500	BmNPV	92500	8	0.000161941	0.0122869	10820000	10825000	90000	95000	8	1
Bomo_Chr24	10822500	BmNPV	107500	8	0.000161941	0.0122869	10820000	10825000	105000	110000	8	1
Bomo_Chr24	11287500	BmNPV	127500	8	0.000161941	0.0122869	11285000	11290000	125000	130000	8	1
Bomo_Chr24	11302500	BmNPV	2500	15	7.50423e-11	1.06161e-08	11300000	11305000	0	10000	26	1
Bomo_Chr24	11302500	BmNPV	42500	21	2.04303e-17	3.84409e-15	11300000	11305000	20000	50000	103	1
Bomo_Chr24	11302500	BmNPV	62500	18	4.98782e-14	8.26753e-12	11300000	11305000	55000	70000	38	1
Bomo_Chr24	11302500	BmNPV	82500	26	1.87403e-23	4.18485e-21	11300000	11305000	75000	130000	173	1
Bomo_Chr24	12222500	BmNPV	22500	10	3.86084e-06	0.000370259	12220000	12225000	20000	25000	10	1
Bomo_Chr24	12222500	BmNPV	62500	8	0.000161941	0.0122869	12220000	12225000	60000	65000	8	1
Bomo_Chr24	12222500	BmNPV	82500	8	0.000161941	0.0122869	12220000	12225000	80000	85000	8	1
Bomo_Chr24	12222500	BmNPV	127500	8	0.000161941	0.0122869	12220000	12225000	125000	130000	8	1
Bomo_Chr24	12247500	BmNPV	47500	8	0.000161941	0.0122869	12245000	12250000	45000	50000	8	1
Bomo_Chr24	12247500	BmNPV	122500	10	3.86084e-06	0.000370259	12245000	12250000	120000	125000	10	1
Bomo_Chr24	12342500	BmNPV	97500	13	7.20433e-09	8.93195e-07	12340000	12345000	95000	105000	21	1
Bomo_Chr24	12342500	BmNPV	127500	8	0.000161941	0.0122869	12340000	12345000	125000	130000	8	1
Bomo_Chr24	12372500	BmNPV	127500	9	2.6311e-05	0.00226373	12370000	12375000	125000	130000	9	1
Bomo_Chr24	12397500	BmNPV	82500	10	3.86084e-06	0.000370259	12395000	12400000	80000	85000	10	1
Bomo_Chr24	12397500	BmNPV	112500	8	0.000161941	0.0122869	12395000	12400000	110000	115000	8	1
Bomo_Chr24	12532500	BmNPV	42500	8	0.000161941	0.0122869	12530000	12535000	40000	45000	8	1
Bomo_Chr24	12597500	BmNPV	122500	8	0.000161941	0.0122869	12595000	12600000	120000	125000	8	1
Bomo_Chr24	12972500	BmNPV	112500	9	2.6311e-05	0.00226373	12970000	12975000	110000	115000	9	1
Bomo_Chr24	13117500	BmNPV	37500	8	0.000161941	0.0122869	13115000	13120000	35000	40000	8	1
Bomo_Chr24	13267500	BmNPV	32500	8	0.000161941	0.0122869	13265000	13270000	30000	35000	8	1
Bomo_Chr24	13477500	BmNPV	2500	9	2.6311e-05	0.00226373	13475000	13480000	0	10000	18	1
Bomo_Chr24	13477500	BmNPV	22500	17	6.05488e-13	9.56178e-11	13475000	13480000	20000	35000	42	1
Bomo_Chr24	13477500	BmNPV	52500	11	5.16374e-07	5.44926e-05	13475000	13480000	40000	60000	36	1
Bomo_Chr24	13477500	BmNPV	77500	12	6.34341e-08	7.28518e-06	13475000	13480000	75000	85000	20	1
Bomo_Chr24	13477500	BmNPV	92500	10	3.86084e-06	0.000370259	13475000	13480000	90000	95000	10	1
Bomo_Chr24	13477500	BmNPV	102500	9	2.6311e-05	0.00226373	13475000	13480000	100000	105000	9	1
Bomo_Chr24	13477500	BmNPV	112500	8	0.000161941	0.0122869	13475000	13480000	110000	115000	8	1
Bomo_Chr24	13477500	BmNPV	122500	20	2.88986e-16	5.22248e-14	13475000	13480000	120000	130000	29	1
Bomo_Chr24	13497500	BmNPV	112500	8	0.000161941	0.0122869	13495000	13500000	110000	115000	8	1
Bomo_Chr24	13582500	BmNPV	77500	11	5.16374e-07	5.44926e-05	13580000	13585000	75000	80000	11	1
Bomo_Chr24	13777500	BmNPV	127500	10	3.86084e-06	0.000370259	13775000	13780000	125000	130000	10	1
Bomo_Chr24	13847500	BmNPV	82500	61	1.65039e-74	6.42535e-72	13845000	13850000	0	130000	903	1
Bomo_Chr24	13872500	BmNPV	7500	11	5.16374e-07	5.44926e-05	13870000	13875000	0	15000	28	1
Bomo_Chr24	13872500	BmNPV	42500	14	7.60703e-10	1.01057e-07	13870000	13875000	20000	45000	58	1
Bomo_Chr24	13872500	BmNPV	62500	17	6.05488e-13	9.56178e-11	13870000	13875000	50000	70000	46	1
Bomo_Chr24	13872500	BmNPV	82500	14	7.60703e-10	1.01057e-07	13870000	13875000	80000	85000	14	1
Bomo_Chr24	13872500	BmNPV	92500	19	3.89442e-15	6.7524e-13	13870000	13875000	90000	110000	54	1
Bomo_Chr24	13872500	BmNPV	122500	14	7.60703e-10	1.01057e-07	13870000	13875000	120000	130000	22	1
Bomo_Chr24	13942500	BmNPV	77500	13	7.20433e-09	8.93195e-07	13940000	13945000	75000	80000	13	1
Bomo_Chr24	13942500	BmNPV	97500	10	3.86084e-06	0.000370259	13940000	13945000	95000	100000	10	1
Bomo_Chr24	13997500	BmNPV	62500	56	1.60927e-66	6.06859e-64	13995000	14000000	0	130000	969	1
Bomo_Chr24	14007500	BmNPV	42500	10	3.86084e-06	0.000370259	14005000	14010000	40000	45000	10	1
Bomo_Chr24	14007500	BmNPV	112500	10	3.86084e-06	0.000370259	14005000	14010000	105000	115000	18	1
Bomo_Chr24	14007500	BmNPV	122500	10	3.86084e-06	0.000370259	14005000	14010000	120000	125000	10	1
Bomo_Chr24	14072500	BmNPV	62500	8	0.000161941	0.0122869	14070000	14075000	60000	65000	8	1
Bomo_Chr24	14222500	BmNPV	32500	10	3.86084e-06	0.000370259	14220000	14225000	30000	35000	10	1
Bomo_Chr24	14222500	BmNPV	82500	10	3.86084e-06	0.000370259	14220000	14225000	75000	85000	18	1
Bomo_Chr24	14222500	BmNPV	92500	10	3.86084e-06	0.000370259	14220000	14225000	90000	100000	18	1
Bomo_Chr24	14222500	BmNPV	112500	8	0.000161941	0.0122869	14220000	14225000	110000	115000	8	1
Bomo_Chr24	14472500	BmNPV	32500	9	2.6311e-05	0.00226373	14470000	14475000	30000	35000	9	1
Bomo_Chr24	14472500	BmNPV	92500	10	3.86084e-06	0.000370259	14470000	14475000	90000	95000	10	1
Bomo_Chr24	14472500	BmNPV	112500	12	6.34341e-08	7.28518e-06	14470000	14475000	110000	115000	12	1
Bomo_Chr24	14472500	BmNPV	122500	8	0.000161941	0.0122869	14470000	14475000	120000	125000	8	1
Bomo_Chr24	14477500	BmNPV	47500	8	0.000161941	0.0122869	14475000	14480000	45000	50000	8	1
Bomo_Chr24	14487500	BmNPV	22500	9	2.6311e-05	0.00226373	14485000	14490000	20000	25000	9	1
Bomo_Chr24	14657500	BmNPV	92500	63	9.3699e-78	3.68737e-75	14655000	14660000	0	130000	956	1
Bomo_Chr24	14692500	BmNPV	92500	9	2.6311e-05	0.00226373	14690000	14695000	90000	95000	9	1
Bomo_Chr24	14702500	BmNPV	47500	9	2.6311e-05	0.00226373	14700000	14705000	45000	50000	9	1
Bomo_Chr24	14957500	BmNPV	42500	10	3.86084e-06	0.000370259	14955000	14960000	40000	45000	10	1
Bomo_Chr24	14957500	BmNPV	112500	9	2.6311e-05	0.00226373	14955000	14960000	110000	115000	9	1
Bomo_Chr24	15147500	BmNPV	92500	10	3.86084e-06	0.000370259	15145000	15150000	90000	95000	10	1
Bomo_Chr24	15677500	BmNPV	42500	39	6.47249e-41	1.97736e-38	15675000	15680000	0	55000	275	1
Bomo_Chr24	15677500	BmNPV	82500	46	3.88458e-51	1.32434e-48	15675000	15680000	60000	130000	400	1
Bomo_Chr24	15857500	BmNPV	32500	9	2.6311e-05	0.00226373	15855000	15860000	30000	35000	9	1
Bomo_Chr24	15857500	BmNPV	42500	8	0.000161941	0.0122869	15855000	15860000	40000	45000	8	1
Bomo_Chr24	15857500	BmNPV	82500	8	0.000161941	0.0122869	15855000	15860000	80000	85000	8	1
Bomo_Chr24	15857500	BmNPV	107500	8	0.000161941	0.0122869	15855000	15860000	105000	110000	8	1
Bomo_Chr24	16157500	BmNPV	52500	9	2.6311e-05	0.00226373	16155000	16160000	50000	55000	9	1
Bomo_Chr24	16157500	BmNPV	102500	8	0.000161941	0.0122869	16155000	16160000	100000	105000	8	1
Bomo_Chr24	16372500	BmNPV	82500	8	0.000161941	0.0122869	16370000	16375000	80000	85000	8	1
Bomo_Chr24	16437500	BmNPV	77500	9	2.6311e-05	0.00226373	16435000	16440000	75000	80000	9	1
Bomo_Chr24	16487500	BmNPV	122500	8	0.000161941	0.0122869	16485000	16490000	120000	125000	8	1
Bomo_Chr24	16632500	BmNPV	7500	8	0.000161941	0.0122869	16630000	16635000	5000	10000	8	1
Bomo_Chr24	16657500	BmNPV	122500	8	0.000161941	0.0122869	16655000	16660000	120000	125000	8	1
Bomo_Chr24	16722500	BmNPV	77500	9	2.6311e-05	0.00226373	16720000	16725000	75000	80000	9	1
Bomo_Chr24	16722500	BmNPV	127500	8	0.000161941	0.0122869	16720000	16725000	125000	130000	8	1
Bomo_Chr24	16732500	BmNPV	27500	9	2.6311e-05	0.00226373	16730000	16735000	25000	30000	9	1
Bomo_Chr24	16732500	BmNPV	97500	11	5.16374e-07	5.44926e-05	16730000	16735000	95000	100000	11	1
Bomo_Chr24	16732500	BmNPV	122500	10	3.86084e-06	0.000370259	16730000	16735000	120000	125000	10	1
Bomo_Chr24	16782500	BmNPV	2500	8	0.000161941	0.0122869	16780000	16785000	0	5000	8	1
Bomo_Chr24	16787500	BmNPV	92500	11	5.16374e-07	5.44926e-05	16785000	16790000	90000	95000	11	1
Bomo_Chr24	16787500	BmNPV	122500	8	0.000161941	0.0122869	16785000	16790000	120000	125000	8	1
Bomo_Chr24	16832500	BmNPV	127500	9	2.6311e-05	0.00226373	16825000	16835000	120000	130000	17	0.5
Bomo_Chr24	16862500	BmNPV	62500	9	2.6311e-05	0.00226373	16860000	16865000	60000	65000	9	1
Bomo_Chr24	16862500	BmNPV	82500	13	7.20433e-09	8.93195e-07	16860000	16865000	80000	90000	21	1
Bomo_Chr24	16932500	BmNPV	27500	8	0.000161941	0.0122869	16930000	16935000	25000	30000	8	1
Bomo_Chr24	17012500	BmNPV	82500	8	0.000161941	0.0122869	17010000	17015000	80000	85000	8	1
Bomo_Chr24	17012500	BmNPV	92500	9	2.6311e-05	0.00226373	17010000	17015000	90000	100000	17	1
Bomo_Chr24	17342500	BmNPV	122500	9	2.6311e-05	0.00226373	17340000	17345000	120000	125000	9	1
Bomo_Chr25	307500	BmNPV	77500	8	0.000161941	0.0122869	305000	310000	75000	80000	8	1
Bomo_Chr25	707500	BmNPV	92500	8	0.000161941	0.0122869	705000	710000	90000	95000	8	1
Bomo_Chr25	707500	BmNPV	112500	9	2.6311e-05	0.00226373	705000	710000	110000	115000	9	1
Bomo_Chr25	1127500	BmNPV	37500	11	5.16374e-07	5.44926e-05	1125000	1130000	35000	40000	11	1
Bomo_Chr25	1147500	BmNPV	92500	8	0.000161941	0.0122869	1145000	1150000	90000	95000	8	1
Bomo_Chr25	1157500	BmNPV	127500	8	0.000161941	0.0122869	1155000	1160000	125000	130000	8	1
Bomo_Chr25	1197500	BmNPV	82500	8	0.000161941	0.0122869	1195000	1200000	80000	85000	8	1
Bomo_Chr25	1197500	BmNPV	122500	10	3.86084e-06	0.000370259	1195000	1200000	120000	125000	10	1
Bomo_Chr25	1232500	BmNPV	32500	8	0.000161941	0.0122869	1230000	1235000	30000	35000	8	1
Bomo_Chr25	1237500	BmNPV	82500	9	2.6311e-05	0.00226373	1235000	1240000	80000	85000	9	1
Bomo_Chr25	1962500	BmNPV	42500	9	2.6311e-05	0.00226373	1960000	1965000	40000	45000	9	1
Bomo_Chr25	1962500	BmNPV	77500	8	0.000161941	0.0122869	1960000	1965000	75000	80000	8	1
Bomo_Chr25	2012500	BmNPV	102500	8	0.000161941	0.0122869	2010000	2015000	100000	105000	8	1
Bomo_Chr25	2072500	BmNPV	62500	10	3.86084e-06	0.000370259	2070000	2075000	60000	65000	10	1
Bomo_Chr25	2602500	BmNPV	32500	8	0.000161941	0.0122869	2600000	2605000	30000	35000	8	1
Bomo_Chr25	2722500	BmNPV	42500	8	0.000161941	0.0122869	2720000	2725000	40000	45000	8	1
Bomo_Chr25	3062500	BmNPV	82500	11	5.16374e-07	5.44926e-05	3060000	3065000	80000	85000	11	1
Bomo_Chr25	3777500	BmNPV	77500	47	1.23043e-52	4.24846e-50	3775000	3780000	0	130000	784	1
Bomo_Chr25	4012500	BmNPV	22500	8	0.000161941	0.0122869	4010000	4015000	20000	25000	8	1
Bomo_Chr25	4012500	BmNPV	122500	8	0.000161941	0.0122869	4010000	4015000	120000	125000	8	1
Bomo_Chr25	4527500	BmNPV	92500	9	2.6311e-05	0.00226373	4525000	4530000	90000	100000	17	1
Bomo_Chr25	4777500	BmNPV	82500	9	2.6311e-05	0.00226373	4775000	4780000	80000	85000	9	1
Bomo_Chr25	4842500	BmNPV	92500	8	0.000161941	0.0122869	4840000	4845000	90000	95000	8	1
Bomo_Chr25	5122500	BmNPV	62500	8	0.000161941	0.0122869	5120000	5125000	60000	65000	8	1
Bomo_Chr25	5532500	BmNPV	12500	13	7.20433e-09	8.93195e-07	5530000	5535000	0	15000	32	1
Bomo_Chr25	5532500	BmNPV	37500	12	6.34341e-08	7.28518e-06	5530000	5535000	25000	45000	41	1
Bomo_Chr25	5532500	BmNPV	52500	9	2.6311e-05	0.00226373	5530000	5535000	50000	55000	9	1
Bomo_Chr25	5532500	BmNPV	62500	14	7.60703e-10	1.01057e-07	5530000	5535000	60000	70000	23	1
Bomo_Chr25	5532500	BmNPV	77500	14	7.60703e-10	1.01057e-07	5530000	5535000	75000	85000	25	1
Bomo_Chr25	5532500	BmNPV	92500	9	2.6311e-05	0.00226373	5530000	5535000	90000	100000	17	1
Bomo_Chr25	5532500	BmNPV	122500	18	4.98782e-14	8.26753e-12	5530000	5535000	110000	130000	59	1
Bomo_Chr25	5647500	BmNPV	92500	111	2.12531e-162	9.04674e-160	5630000	5650000	0	130000	6064	1
Bomo_Chr25	5782500	BmNPV	42500	9	2.6311e-05	0.00226373	5780000	5785000	40000	45000	9	1
Bomo_Chr25	6117500	BmNPV	92500	61	1.65039e-74	6.42535e-72	6115000	6120000	0	130000	942	1
Bomo_Chr25	6167500	BmNPV	77500	8	0.000161941	0.0122869	6165000	6170000	75000	80000	8	1
Bomo_Chr25	6167500	BmNPV	92500	9	2.6311e-05	0.00226373	6165000	6170000	90000	95000	9	1
Bomo_Chr25	6192500	BmNPV	92500	81	4.16304e-108	1.73041e-105	6185000	6195000	0	130000	2349	1
Bomo_Chr25	6202500	BmNPV	122500	63	9.3699e-78	3.68737e-75	6200000	6205000	0	130000	1063	1
Bomo_Chr25	6262500	BmNPV	92500	60	6.76062e-73	2.61759e-70	6260000	6265000	0	130000	861	1
Bomo_Chr25	7202500	BmNPV	62500	11	5.16374e-07	5.44926e-05	7200000	7205000	60000	65000	11	1
Bomo_Chr25	7362500	BmNPV	52500	9	2.6311e-05	0.00226373	7360000	7365000	50000	55000	9	1
Bomo_Chr25	8377500	BmNPV	82500	63	9.3699e-78	3.68737e-75	8375000	8380000	0	130000	834	1
Bomo_Chr25	8557500	BmNPV	122500	8	0.000161941	0.0122869	8555000	8560000	120000	125000	8	1
Bomo_Chr25	8702500	BmNPV	32500	8	0.000161941	0.0122869	8700000	8705000	30000	35000	8	1
Bomo_Chr25	8802500	BmNPV	2500	8	0.000161941	0.0122869	8800000	8805000	0	10000	16	1
Bomo_Chr25	8802500	BmNPV	27500	8	0.000161941	0.0122869	8800000	8805000	25000	30000	8	1
Bomo_Chr25	8802500	BmNPV	92500	8	0.000161941	0.0122869	8800000	8805000	90000	95000	8	1
Bomo_Chr25	8847500	BmNPV	92500	60	6.76062e-73	2.61759e-70	8845000	8850000	0	130000	878	1
Bomo_Chr25	8892500	BmNPV	92500	51	1.00795e-58	3.64036e-56	8890000	8895000	0	130000	775	1
Bomo_Chr25	8972500	BmNPV	122500	53	8.10776e-62	2.98203e-59	8970000	8975000	0	130000	908	1
Bomo_Chr25	9007500	BmNPV	127500	65	4.99507e-81	1.98415e-78	9005000	9010000	0	130000	893	1
Bomo_Chr25	9022500	BmNPV	82500	55	6.05227e-65	2.26411e-62	9020000	9025000	0	130000	794	1
Bomo_Chr25	9037500	BmNPV	82500	57	4.20397e-68	1.59708e-65	9035000	9045000	0	130000	2025	1
Bomo_Chr25	9217500	BmNPV	112500	9	2.6311e-05	0.00226373	9215000	9220000	110000	115000	9	1
Bomo_Chr25	9572500	BmNPV	2500	8	0.000161941	0.0122869	9570000	9575000	0	5000	8	1
Bomo_Chr25	9592500	BmNPV	7500	8	0.000161941	0.0122869	9590000	9595000	5000	10000	8	1
Bomo_Chr25	9657500	BmNPV	22500	9	2.6311e-05	0.00226373	9655000	9660000	20000	25000	9	1
Bomo_Chr25	9732500	BmNPV	47500	10	3.86084e-06	0.000370259	9730000	9735000	45000	50000	10	1
Bomo_Chr25	9777500	BmNPV	2500	8	0.000161941	0.0122869	9775000	9780000	0	5000	8	1
Bomo_Chr25	9842500	BmNPV	127500	8	0.000161941	0.0122869	9840000	9845000	125000	130000	8	1
Bomo_Chr25	9872500	BmNPV	97500	8	0.000161941	0.0122869	9870000	9875000	95000	100000	8	1
Bomo_Chr25	10047500	BmNPV	47500	9	2.6311e-05	0.00226373	10045000	10050000	45000	50000	9	1
Bomo_Chr25	10047500	BmNPV	62500	9	2.6311e-05	0.00226373	10045000	10050000	60000	65000	9	1
Bomo_Chr25	10047500	BmNPV	82500	9	2.6311e-05	0.00226373	10045000	10050000	80000	85000	9	1
Bomo_Chr25	10047500	BmNPV	92500	11	5.16374e-07	5.44926e-05	10045000	10050000	90000	95000	11	1
Bomo_Chr25	10587500	BmNPV	82500	8	0.000161941	0.0122869	10585000	10590000	80000	85000	8	1
Bomo_Chr25	10587500	BmNPV	92500	8	0.000161941	0.0122869	10585000	10590000	90000	95000	8	1
Bomo_Chr25	11462500	BmNPV	112500	8	0.000161941	0.0122869	11460000	11465000	110000	115000	8	1
Bomo_Chr25	11587500	BmNPV	97500	10	3.86084e-06	0.000370259	11585000	11590000	95000	100000	10	1
Bomo_Chr25	11677500	BmNPV	122500	8	0.000161941	0.0122869	11675000	11680000	120000	125000	8	1
Bomo_Chr25	11872500	BmNPV	32500	9	2.6311e-05	0.00226373	11870000	11875000	30000	35000	9	1
Bomo_Chr25	11872500	BmNPV	47500	8	0.000161941	0.0122869	11870000	11875000	45000	50000	8	1
Bomo_Chr25	11922500	BmNPV	102500	8	0.000161941	0.0122869	11920000	11925000	100000	105000	8	1
Bomo_Chr25	12842500	BmNPV	32500	11	5.16374e-07	5.44926e-05	12840000	12845000	30000	35000	11	1
Bomo_Chr25	12932500	BmNPV	77500	9	2.6311e-05	0.00226373	12930000	12935000	75000	80000	9	1
Bomo_Chr25	12932500	BmNPV	122500	9	2.6311e-05	0.00226373	12930000	12935000	120000	125000	9	1
Bomo_Chr25	13907500	BmNPV	92500	8	0.000161941	0.0122869	13905000	13910000	90000	95000	8	1
Bomo_Chr25	14382500	BmNPV	27500	8	0.000161941	0.0122869	14380000	14385000	25000	30000	8	1
Bomo_Chr25	14382500	BmNPV	47500	9	2.6311e-05	0.00226373	14380000	14385000	45000	50000	9	1
Bomo_Chr26	42500	BmNPV	62500	8	0.000161941	0.0122869	40000	45000	60000	65000	8	1
Bomo_Chr26	72500	BmNPV	122500	9	2.6311e-05	0.00226373	70000	75000	120000	125000	9	1
Bomo_Chr26	332500	BmNPV	112500	9	2.6311e-05	0.00226373	330000	335000	110000	115000	9	1
Bomo_Chr26	382500	BmNPV	42500	9	2.6311e-05	0.00226373	380000	385000	40000	45000	9	1
Bomo_Chr26	422500	BmNPV	22500	8	0.000161941	0.0122869	420000	425000	20000	25000	8	1
Bomo_Chr26	697500	BmNPV	82500	8	0.000161941	0.0122869	695000	700000	80000	85000	8	1
Bomo_Chr26	697500	BmNPV	92500	9	2.6311e-05	0.00226373	695000	700000	90000	95000	9	1
Bomo_Chr26	762500	BmNPV	62500	8	0.000161941	0.0122869	760000	765000	60000	65000	8	1
Bomo_Chr26	762500	BmNPV	77500	11	5.16374e-07	5.44926e-05	760000	765000	75000	80000	11	1
Bomo_Chr26	907500	BmNPV	47500	8	0.000161941	0.0122869	905000	910000	45000	50000	8	1
Bomo_Chr26	937500	BmNPV	27500	8	0.000161941	0.0122869	935000	940000	25000	30000	8	1
Bomo_Chr26	937500	BmNPV	42500	8	0.000161941	0.0122869	935000	940000	40000	45000	8	1
Bomo_Chr26	937500	BmNPV	92500	11	5.16374e-07	5.44926e-05	935000	940000	90000	95000	11	1
Bomo_Chr26	1007500	BmNPV	92500	11	5.16374e-07	5.44926e-05	1005000	1010000	90000	95000	11	1
Bomo_Chr26	1362500	BmNPV	112500	8	0.000161941	0.0122869	1360000	1365000	110000	115000	8	1
Bomo_Chr26	1772500	BmNPV	82500	8	0.000161941	0.0122869	1770000	1775000	80000	85000	8	1
Bomo_Chr26	1832500	BmNPV	82500	8	0.000161941	0.0122869	1830000	1835000	80000	85000	8	1
Bomo_Chr26	2532500	BmNPV	82500	10	3.86084e-06	0.000370259	2530000	2535000	80000	85000	10	1
Bomo_Chr26	2672500	BmNPV	82500	9	2.6311e-05	0.00226373	2670000	2675000	80000	85000	9	1
Bomo_Chr26	2672500	BmNPV	102500	9	2.6311e-05	0.00226373	2670000	2675000	100000	115000	26	1
Bomo_Chr26	2732500	BmNPV	7500	8	0.000161941	0.0122869	2730000	2735000	5000	10000	8	1
Bomo_Chr26	2732500	BmNPV	127500	8	0.000161941	0.0122869	2730000	2735000	125000	130000	8	1
Bomo_Chr26	2882500	BmNPV	82500	45	1.20034e-49	4.03745e-47	2880000	2885000	0	130000	749	1
Bomo_Chr26	3007500	BmNPV	42500	122	3.03925e-183	1.29767e-180	3005000	3010000	0	130000	2097	1
Bomo_Chr26	3632500	BmNPV	77500	8	0.000161941	0.0122869	3630000	3635000	75000	80000	8	1
Bomo_Chr26	3882500	BmNPV	122500	70	2.51938e-89	1.0198e-86	3880000	3885000	0	130000	1111	1
Bomo_Chr26	3892500	BmNPV	42500	56	1.60927e-66	6.06859e-64	3890000	3895000	0	130000	970	1
Bomo_Chr26	4372500	BmNPV	42500	9	2.6311e-05	0.00226373	4370000	4375000	40000	45000	9	1
Bomo_Chr26	5062500	BmNPV	92500	9	2.6311e-05	0.00226373	5060000	5065000	90000	95000	9	1
Bomo_Chr26	5222500	BmNPV	27500	8	0.000161941	0.0122869	5220000	5225000	25000	30000	8	1
Bomo_Chr26	5222500	BmNPV	47500	10	3.86084e-06	0.000370259	5220000	5225000	45000	50000	10	1
Bomo_Chr26	5272500	BmNPV	82500	9	2.6311e-05	0.00226373	5270000	5275000	80000	85000	9	1
Bomo_Chr26	5272500	BmNPV	92500	8	0.000161941	0.0122869	5270000	5275000	90000	95000	8	1
Bomo_Chr26	5272500	BmNPV	127500	8	0.000161941	0.0122869	5270000	5275000	125000	130000	8	1
Bomo_Chr26	5287500	BmNPV	62500	8	0.000161941	0.0122869	5285000	5290000	60000	65000	8	1
Bomo_Chr26	5287500	BmNPV	82500	8	0.000161941	0.0122869	5285000	5290000	80000	85000	8	1
Bomo_Chr26	5352500	BmNPV	77500	8	0.000161941	0.0122869	5350000	5355000	75000	80000	8	1
Bomo_Chr26	5392500	BmNPV	122500	10	3.86084e-06	0.000370259	5390000	5395000	120000	125000	10	1
Bomo_Chr26	5692500	BmNPV	112500	8	0.000161941	0.0122869	5690000	5695000	110000	115000	8	1
Bomo_Chr26	5697500	BmNPV	122500	8	0.000161941	0.0122869	5695000	5700000	120000	125000	8	1
Bomo_Chr26	5902500	BmNPV	82500	9	2.6311e-05	0.00226373	5900000	5905000	80000	85000	9	1
Bomo_Chr26	6082500	BmNPV	82500	8	0.000161941	0.0122869	6080000	6085000	80000	85000	8	1
Bomo_Chr26	6702500	BmNPV	127500	9	2.6311e-05	0.00226373	6700000	6705000	125000	130000	9	1
Bomo_Chr26	6727500	BmNPV	102500	9	2.6311e-05	0.00226373	6725000	6730000	100000	105000	9	1
Bomo_Chr26	6737500	BmNPV	112500	11	5.16374e-07	5.44926e-05	6735000	6740000	110000	115000	11	1
Bomo_Chr26	6907500	BmNPV	47500	9	2.6311e-05	0.00226373	6905000	6910000	45000	50000	9	1
Bomo_Chr26	6907500	BmNPV	92500	8	0.000161941	0.0122869	6905000	6910000	90000	95000	8	1
Bomo_Chr26	7182500	BmNPV	82500	9	2.6311e-05	0.00226373	7180000	7185000	80000	85000	9	1
Bomo_Chr26	7182500	BmNPV	112500	10	3.86084e-06	0.000370259	7180000	7185000	105000	115000	18	1
Bomo_Chr26	8427500	BmNPV	122500	8	0.000161941	0.0122869	8425000	8430000	120000	125000	8	1
Bomo_Chr26	8777500	BmNPV	92500	11	5.16374e-07	5.44926e-05	8775000	8780000	90000	95000	11	1
Bomo_Chr26	9137500	BmNPV	112500	8	0.000161941	0.0122869	9135000	9140000	110000	115000	8	1
Bomo_Chr26	9632500	BmNPV	2500	11	5.16374e-07	5.44926e-05	9630000	9635000	0	5000	11	1
Bomo_Chr26	9632500	BmNPV	22500	10	3.86084e-06	0.000370259	9630000	9635000	20000	25000	10	1
Bomo_Chr26	9632500	BmNPV	67500	9	2.6311e-05	0.00226373	9630000	9635000	65000	70000	9	1
Bomo_Chr26	9632500	BmNPV	122500	10	3.86084e-06	0.000370259	9630000	9635000	120000	125000	10	1
Bomo_Chr26	9747500	BmNPV	102500	8	0.000161941	0.0122869	9745000	9750000	100000	105000	8	1
Bomo_Chr26	9887500	BmNPV	22500	10	3.86084e-06	0.000370259	9885000	9890000	20000	25000	10	1
Bomo_Chr26	9922500	BmNPV	127500	8	0.000161941	0.0122869	9920000	9925000	125000	130000	8	1
Bomo_Chr26	9997500	BmNPV	92500	11	5.16374e-07	5.44926e-05	9995000	10000000	90000	95000	11	1
Bomo_Chr26	10147500	BmNPV	22500	9	2.6311e-05	0.00226373	10145000	10150000	20000	25000	9	1
Bomo_Chr26	10287500	BmNPV	42500	8	0.000161941	0.0122869	10285000	10290000	40000	45000	8	1
Bomo_Chr26	10537500	BmNPV	22500	8	0.000161941	0.0122869	10535000	10540000	20000	25000	8	1
Bomo_Chr26	10827500	BmNPV	92500	9	2.6311e-05	0.00226373	10825000	10830000	90000	95000	9	1
Bomo_Chr26	11162500	BmNPV	107500	9	2.6311e-05	0.00226373	11160000	11165000	105000	110000	9	1
Bomo_Chr26	11222500	BmNPV	52500	8	0.000161941	0.0122869	11220000	11225000	50000	55000	8	1
Bomo_Chr26	11262500	BmNPV	122500	9	2.6311e-05	0.00226373	11260000	11265000	120000	125000	9	1
Bomo_Chr27	67500	BmNPV	102500	9	2.6311e-05	0.00226373	65000	70000	100000	105000	9	1
Bomo_Chr27	392500	BmNPV	92500	8	0.000161941	0.0122869	390000	395000	90000	95000	8	1
Bomo_Chr27	402500	BmNPV	2500	8	0.000161941	0.0122869	400000	405000	0	5000	8	1
Bomo_Chr27	617500	BmNPV	107500	8	0.000161941	0.0122869	615000	620000	105000	110000	8	1
Bomo_Chr27	1167500	BmNPV	92500	8	0.000161941	0.0122869	1165000	1170000	90000	95000	8	1
Bomo_Chr27	1807500	BmNPV	92500	10	3.86084e-06	0.000370259	1805000	1810000	90000	95000	10	1
Bomo_Chr27	2092500	BmNPV	47500	8	0.000161941	0.0122869	2090000	2095000	45000	50000	8	1
Bomo_Chr27	2207500	BmNPV	22500	8	0.000161941	0.0122869	2205000	2210000	20000	25000	8	1
Bomo_Chr27	2282500	BmNPV	62500	9	2.6311e-05	0.00226373	2280000	2285000	60000	65000	9	1
Bomo_Chr27	2972500	BmNPV	62500	8	0.000161941	0.0122869	2970000	2975000	60000	65000	8	1
Bomo_Chr27	3392500	BmNPV	47500	8	0.000161941	0.0122869	3390000	3395000	45000	50000	8	1
Bomo_Chr27	3392500	BmNPV	92500	8	0.000161941	0.0122869	3390000	3395000	90000	95000	8	1
Bomo_Chr27	3992500	BmNPV	47500	8	0.000161941	0.0122869	3990000	3995000	45000	50000	8	1
Bomo_Chr27	3992500	BmNPV	107500	9	2.6311e-05	0.00226373	3990000	3995000	105000	110000	9	1
Bomo_Chr27	4037500	BmNPV	62500	8	0.000161941	0.0122869	4035000	4040000	60000	65000	8	1
Bomo_Chr27	4057500	BmNPV	82500	8	0.000161941	0.0122869	4055000	4060000	80000	85000	8	1
Bomo_Chr27	5052500	BmNPV	77500	8	0.000161941	0.0122869	5050000	5055000	75000	80000	8	1
Bomo_Chr27	5282500	BmNPV	42500	9	2.6311e-05	0.00226373	5280000	5285000	40000	45000	9	1
Bomo_Chr27	5707500	BmNPV	2500	18	4.98782e-14	8.26753e-12	5705000	5710000	0	15000	45	1
Bomo_Chr27	5707500	BmNPV	82500	33	1.40054e-32	3.77157e-30	5705000	5710000	20000	130000	446	1
Bomo_Chr27	6352500	BmNPV	92500	40	2.40829e-42	7.49264e-40	6350000	6355000	0	130000	686	1
Bomo_Chr27	6512500	BmNPV	82500	71	5.28461e-91	2.1461e-88	6510000	6515000	0	130000	1121	1
Bomo_Chr27	6597500	BmNPV	122500	53	8.10776e-62	2.98203e-59	6595000	6600000	0	130000	893	1
Bomo_Chr27	6607500	BmNPV	62500	42	3.09835e-45	9.96948e-43	6605000	6610000	0	130000	663	1
Bomo_Chr27	6637500	BmNPV	82500	55	6.05227e-65	2.26411e-62	6635000	6645000	0	130000	1676	1
Bomo_Chr27	6662500	BmNPV	122500	47	1.23043e-52	4.24846e-50	6655000	6665000	0	130000	1509	1
Bomo_Chr27	6672500	BmNPV	82500	54	2.23558e-63	8.29362e-61	6670000	6675000	0	130000	883	1
Bomo_Chr27	6737500	BmNPV	82500	51	1.00795e-58	3.64036e-56	6735000	6740000	0	130000	665	1
Bomo_Chr27	7042500	BmNPV	77500	54	2.23558e-63	8.29362e-61	7040000	7045000	0	130000	909	1
Bomo_Chr27	7122500	BmNPV	92500	76	1.74658e-99	7.18782e-97	7120000	7125000	0	130000	1175	1
Bomo_Chr27	7312500	BmNPV	42500	8	0.000161941	0.0122869	7310000	7315000	40000	45000	8	1
Bomo_Chr27	7847500	BmNPV	47500	8	0.000161941	0.0122869	7845000	7850000	45000	50000	8	1
Bomo_Chr27	8067500	BmNPV	22500	10	3.86084e-06	0.000370259	8065000	8070000	20000	25000	10	1
Bomo_Chr27	8067500	BmNPV	82500	11	5.16374e-07	5.44926e-05	8065000	8070000	80000	85000	11	1
Bomo_Chr27	8067500	BmNPV	127500	10	3.86084e-06	0.000370259	8065000	8070000	125000	130000	10	1
Bomo_Chr27	8082500	BmNPV	27500	11	5.16374e-07	5.44926e-05	8080000	8085000	25000	30000	11	1
Bomo_Chr27	8152500	BmNPV	27500	8	0.000161941	0.0122869	8150000	8155000	25000	30000	8	1
Bomo_Chr27	8152500	BmNPV	82500	10	3.86084e-06	0.000370259	8150000	8155000	80000	85000	10	1
Bomo_Chr27	8157500	BmNPV	62500	8	0.000161941	0.0122869	8155000	8160000	60000	65000	8	1
Bomo_Chr27	8327500	BmNPV	62500	8	0.000161941	0.0122869	8325000	8330000	60000	65000	8	1
Bomo_Chr27	8732500	BmNPV	62500	41	8.74266e-44	2.76809e-41	8730000	8735000	0	130000	581	1
Bomo_Chr27	8767500	BmNPV	122500	60	6.76062e-73	2.61759e-70	8760000	8770000	0	130000	1880	1
Bomo_Chr27	9007500	BmNPV	32500	8	0.000161941	0.0122869	9005000	9010000	30000	35000	8	1
Bomo_Chr27	9067500	BmNPV	122500	10	3.86084e-06	0.000370259	9065000	9070000	120000	125000	10	1
Bomo_Chr27	9357500	BmNPV	82500	8	0.000161941	0.0122869	9355000	9360000	80000	85000	8	1
Bomo_Chr27	9622500	BmNPV	82500	8	0.000161941	0.0122869	9620000	9625000	80000	85000	8	1
Bomo_Chr27	9717500	BmNPV	77500	10	3.86084e-06	0.000370259	9715000	9720000	75000	80000	10	1
Bomo_Chr27	9857500	BmNPV	92500	10	3.86084e-06	0.000370259	9855000	9860000	90000	95000	10	1
Bomo_Chr27	10172500	BmNPV	62500	8	0.000161941	0.0122869	10170000	10175000	60000	65000	8	1
Bomo_Chr28	17500	BmNPV	92500	11	5.16374e-07	5.44926e-05	15000	20000	90000	95000	11	1
Bomo_Chr28	17500	BmNPV	102500	9	2.6311e-05	0.00226373	15000	20000	100000	110000	18	1
Bomo_Chr28	452500	BmNPV	72500	8	0.000161941	0.0122869	450000	455000	70000	75000	8	1
Bomo_Chr28	512500	BmNPV	47500	8	0.000161941	0.0122869	510000	515000	45000	50000	8	1
Bomo_Chr28	592500	BmNPV	77500	8	0.000161941	0.0122869	590000	595000	75000	80000	8	1
Bomo_Chr28	687500	BmNPV	72500	8	0.000161941	0.0122869	685000	690000	70000	75000	8	1
Bomo_Chr28	772500	BmNPV	107500	8	0.000161941	0.0122869	770000	775000	105000	110000	8	1
Bomo_Chr28	1242500	BmNPV	42500	9	2.6311e-05	0.00226373	1240000	1245000	40000	45000	9	1
Bomo_Chr28	1242500	BmNPV	62500	12	6.34341e-08	7.28518e-06	1240000	1245000	60000	65000	12	1
Bomo_Chr28	1642500	BmNPV	92500	9	2.6311e-05	0.00226373	1640000	1645000	90000	95000	9	1
Bomo_Chr28	1672500	BmNPV	42500	8	0.000161941	0.0122869	1670000	1675000	40000	45000	8	1
Bomo_Chr28	1737500	BmNPV	82500	10	3.86084e-06	0.000370259	1735000	1740000	80000	85000	10	1
Bomo_Chr28	1802500	BmNPV	62500	8	0.000161941	0.0122869	1800000	1805000	60000	65000	8	1
Bomo_Chr28	2787500	BmNPV	82500	8	0.000161941	0.0122869	2785000	2790000	80000	85000	8	1
Bomo_Chr28	4847500	BmNPV	47500	9	2.6311e-05	0.00226373	4845000	4850000	45000	50000	9	1
Bomo_Chr28	5082500	BmNPV	32500	8	0.000161941	0.0122869	5080000	5085000	30000	35000	8	1
Bomo_Chr28	5082500	BmNPV	42500	8	0.000161941	0.0122869	5080000	5085000	40000	45000	8	1
Bomo_Chr28	5082500	BmNPV	97500	8	0.000161941	0.0122869	5080000	5085000	95000	100000	8	1
Bomo_Chr28	5627500	BmNPV	2500	10	3.86084e-06	0.000370259	5625000	5630000	0	5000	10	1
Bomo_Chr28	5857500	BmNPV	122500	10	3.86084e-06	0.000370259	5855000	5860000	120000	125000	10	1
Bomo_Chr28	6172500	BmNPV	72500	9	2.6311e-05	0.00226373	6170000	6175000	70000	75000	9	1
Bomo_Chr28	7067500	BmNPV	22500	9	2.6311e-05	0.00226373	7065000	7070000	20000	25000	9	1
Bomo_Chr28	7067500	BmNPV	62500	8	0.000161941	0.0122869	7065000	7070000	60000	65000	8	1
Bomo_Chr28	7852500	BmNPV	7500	8	0.000161941	0.0122869	7850000	7855000	5000	10000	8	1
Bomo_Chr28	7852500	BmNPV	92500	9	2.6311e-05	0.00226373	7850000	7855000	90000	95000	9	1
Bomo_Chr28	7877500	BmNPV	92500	8	0.000161941	0.0122869	7875000	7880000	90000	95000	8	1
Bomo_Chr28	8117500	BmNPV	2500	10	3.86084e-06	0.000370259	8115000	8120000	0	10000	18	1
Bomo_Chr28	8117500	BmNPV	22500	10	3.86084e-06	0.000370259	8115000	8120000	20000	25000	10	1
Bomo_Chr28	8117500	BmNPV	32500	9	2.6311e-05	0.00226373	8115000	8120000	30000	35000	9	1
Bomo_Chr28	8117500	BmNPV	42500	20	2.88986e-16	5.22248e-14	8115000	8120000	40000	45000	20	1
Bomo_Chr28	8117500	BmNPV	52500	9	2.6311e-05	0.00226373	8115000	8120000	50000	55000	9	1
Bomo_Chr28	8117500	BmNPV	62500	8	0.000161941	0.0122869	8115000	8120000	60000	70000	16	1
Bomo_Chr28	8117500	BmNPV	82500	15	7.50423e-11	1.06161e-08	8115000	8120000	75000	85000	26	1
Bomo_Chr28	8117500	BmNPV	92500	13	7.20433e-09	8.93195e-07	8115000	8120000	90000	115000	49	1
Bomo_Chr28	8117500	BmNPV	127500	15	7.50423e-11	1.06161e-08	8115000	8120000	120000	130000	27	1
Bomo_Chr28	8257500	BmNPV	92500	34	6.12853e-34	1.68891e-31	8255000	8260000	0	130000	465	1
Bomo_Chr28	8612500	BmNPV	32500	10	3.86084e-06	0.000370259	8610000	8615000	30000	35000	10	1
Bomo_Chr28	8612500	BmNPV	62500	10	3.86084e-06	0.000370259	8610000	8615000	60000	65000	10	1
Bomo_Chr28	8612500	BmNPV	77500	8	0.000161941	0.0122869	8610000	8615000	75000	80000	8	1
Bomo_Chr28	8612500	BmNPV	92500	8	0.000161941	0.0122869	8610000	8615000	90000	95000	8	1
Bomo_Chr28	9457500	BmNPV	92500	8	0.000161941	0.0122869	9455000	9460000	90000	95000	8	1
Bomo_Chr28	9692500	BmNPV	27500	16	6.94582e-12	1.04055e-09	9690000	9695000	0	35000	78	1
Bomo_Chr28	9692500	BmNPV	42500	25	3.27804e-22	7.09219e-20	9690000	9695000	40000	50000	33	1
Bomo_Chr28	9692500	BmNPV	77500	20	2.88986e-16	5.22248e-14	9690000	9695000	55000	85000	89	1
Bomo_Chr28	9692500	BmNPV	92500	18	4.98782e-14	8.26753e-12	9690000	9695000	90000	130000	114	1
Bomo_Chr28	10122500	BmNPV	127500	8	0.000161941	0.0122869	10120000	10125000	125000	130000	8	1
Bomo_Chr28	10142500	BmNPV	112500	8	0.000161941	0.0122869	10140000	10145000	110000	115000	8	1
Bomo_Chr28	10197500	BmNPV	127500	8	0.000161941	0.0122869	10195000	10200000	125000	130000	8	1
Bomo_Chr28	10467500	BmNPV	62500	8	0.000161941	0.0122869	10465000	10470000	60000	65000	8	1
Bomo_Chr28	10472500	BmNPV	92500	8	0.000161941	0.0122869	10470000	10475000	90000	95000	8	1
Bomo_Chr3	42500	BmNPV	92500	8	0.000161941	0.0122869	40000	45000	90000	95000	8	1
Bomo_Chr3	682500	BmNPV	42500	8	0.000161941	0.0122869	680000	685000	40000	45000	8	1
Bomo_Chr3	837500	BmNPV	122500	8	0.000161941	0.0122869	835000	840000	120000	125000	8	1
Bomo_Chr3	937500	BmNPV	47500	8	0.000161941	0.0122869	935000	940000	45000	50000	8	1
Bomo_Chr3	1137500	BmNPV	62500	8	0.000161941	0.0122869	1135000	1140000	60000	65000	8	1
Bomo_Chr3	1137500	BmNPV	82500	9	2.6311e-05	0.00226373	1135000	1140000	80000	85000	9	1
Bomo_Chr3	1597500	BmNPV	92500	8	0.000161941	0.0122869	1595000	1600000	90000	95000	8	1
Bomo_Chr3	1647500	BmNPV	47500	9	2.6311e-05	0.00226373	1645000	1650000	45000	50000	9	1
Bomo_Chr3	1647500	BmNPV	82500	8	0.000161941	0.0122869	1645000	1650000	80000	85000	8	1
Bomo_Chr3	1807500	BmNPV	82500	8	0.000161941	0.0122869	1805000	1810000	80000	85000	8	1
Bomo_Chr3	2332500	BmNPV	62500	10	3.86084e-06	0.000370259	2330000	2335000	60000	65000	10	1
Bomo_Chr3	2332500	BmNPV	82500	10	3.86084e-06	0.000370259	2330000	2335000	80000	85000	10	1
Bomo_Chr3	2407500	BmNPV	42500	9	2.6311e-05	0.00226373	2405000	2410000	40000	45000	9	1
Bomo_Chr3	2492500	BmNPV	122500	8	0.000161941	0.0122869	2490000	2495000	120000	125000	8	1
Bomo_Chr3	3722500	BmNPV	62500	8	0.000161941	0.0122869	3720000	3725000	60000	65000	8	1
Bomo_Chr3	3722500	BmNPV	77500	8	0.000161941	0.0122869	3720000	3725000	75000	80000	8	1
Bomo_Chr3	3812500	BmNPV	92500	9	2.6311e-05	0.00226373	3810000	3815000	90000	95000	9	1
Bomo_Chr3	4287500	BmNPV	82500	9	2.6311e-05	0.00226373	4285000	4290000	80000	85000	9	1
Bomo_Chr3	4312500	BmNPV	77500	8	0.000161941	0.0122869	4310000	4315000	75000	80000	8	1
Bomo_Chr3	4312500	BmNPV	102500	8	0.000161941	0.0122869	4310000	4315000	100000	105000	8	1
Bomo_Chr3	4717500	BmNPV	92500	10	3.86084e-06	0.000370259	4715000	4720000	90000	95000	10	1
Bomo_Chr3	4847500	BmNPV	32500	8	0.000161941	0.0122869	4845000	4850000	30000	35000	8	1
Bomo_Chr3	4847500	BmNPV	122500	8	0.000161941	0.0122869	4845000	4850000	120000	125000	8	1
Bomo_Chr3	4917500	BmNPV	7500	8	0.000161941	0.0122869	4915000	4920000	5000	10000	8	1
Bomo_Chr3	5177500	BmNPV	122500	8	0.000161941	0.0122869	5175000	5180000	120000	125000	8	1
Bomo_Chr3	5237500	BmNPV	12500	18	4.98782e-14	8.26753e-12	5235000	5240000	5000	15000	30	1
Bomo_Chr3	5237500	BmNPV	22500	14	7.60703e-10	1.01057e-07	5235000	5240000	20000	30000	27	1
Bomo_Chr3	5237500	BmNPV	47500	17	6.05488e-13	9.56178e-11	5235000	5240000	40000	55000	44	1
Bomo_Chr3	5237500	BmNPV	127500	25	3.27804e-22	7.09219e-20	5235000	5240000	60000	130000	227	1
Bomo_Chr3	6492500	BmNPV	62500	8	0.000161941	0.0122869	6490000	6495000	60000	65000	8	1
Bomo_Chr3	6492500	BmNPV	122500	11	5.16374e-07	5.44926e-05	6490000	6495000	105000	130000	45	1
Bomo_Chr3	6597500	BmNPV	77500	8	0.000161941	0.0122869	6595000	6600000	75000	80000	8	1
Bomo_Chr3	6612500	BmNPV	82500	8	0.000161941	0.0122869	6610000	6615000	80000	85000	8	1
Bomo_Chr3	7132500	BmNPV	27500	8	0.000161941	0.0122869	7130000	7135000	25000	30000	8	1
Bomo_Chr3	7242500	BmNPV	122500	9	2.6311e-05	0.00226373	7240000	7245000	120000	125000	9	1
Bomo_Chr3	9077500	BmNPV	42500	27	1.03186e-24	2.3743e-22	9075000	9080000	0	55000	200	1
Bomo_Chr3	9077500	BmNPV	122500	38	1.69613e-39	5.08407e-37	9075000	9080000	60000	130000	339	1
Bomo_Chr3	9092500	BmNPV	77500	61	1.65039e-74	6.42535e-72	9090000	9095000	0	130000	914	1
Bomo_Chr3	9107500	BmNPV	42500	53	8.10776e-62	2.98203e-59	9105000	9110000	0	130000	852	1
Bomo_Chr3	9152500	BmNPV	82500	35	2.60532e-35	7.34252e-33	9150000	9155000	0	130000	510	1
Bomo_Chr3	9187500	BmNPV	62500	47	1.23043e-52	4.24846e-50	9185000	9190000	0	130000	828	1
Bomo_Chr3	9337500	BmNPV	92500	48	3.81628e-54	1.33413e-51	9335000	9340000	0	130000	820	1
Bomo_Chr3	9352500	BmNPV	92500	53	8.10776e-62	2.98203e-59	9350000	9355000	0	130000	864	1
Bomo_Chr3	9407500	BmNPV	112500	49	1.15952e-55	4.09994e-53	9405000	9415000	0	130000	1681	1
Bomo_Chr3	9432500	BmNPV	92500	68	5.48653e-86	2.2059e-83	9430000	9435000	0	130000	1192	1
Bomo_Chr3	9777500	BmNPV	2500	8	0.000161941	0.0122869	9775000	9780000	0	5000	8	1
Bomo_Chr3	9777500	BmNPV	42500	9	2.6311e-05	0.00226373	9775000	9780000	40000	45000	9	1
Bomo_Chr3	10427500	BmNPV	82500	8	0.000161941	0.0122869	10425000	10430000	80000	85000	8	1
Bomo_Chr3	10512500	BmNPV	47500	8	0.000161941	0.0122869	10510000	10515000	45000	50000	8	1
Bomo_Chr3	10642500	BmNPV	122500	9	2.6311e-05	0.00226373	10640000	10645000	120000	125000	9	1
Bomo_Chr3	10912500	BmNPV	62500	14	7.60703e-10	1.01057e-07	10910000	10915000	60000	65000	14	1
Bomo_Chr3	11467500	BmNPV	32500	9	2.6311e-05	0.00226373	11465000	11470000	30000	35000	9	1
Bomo_Chr3	12107500	BmNPV	47500	42	3.09835e-45	9.96948e-43	12105000	12110000	0	130000	729	1
Bomo_Chr3	12237500	BmNPV	62500	44	3.62854e-48	1.20354e-45	12235000	12240000	0	130000	770	1
Bomo_Chr3	12247500	BmNPV	77500	52	2.88604e-60	1.05177e-57	12245000	12250000	0	130000	831	1
Bomo_Chr3	12292500	BmNPV	47500	9	2.6311e-05	0.00226373	12290000	12295000	45000	50000	9	1
Bomo_Chr3	12292500	BmNPV	62500	8	0.000161941	0.0122869	12290000	12295000	60000	65000	8	1
Bomo_Chr3	12387500	BmNPV	2500	13	7.20433e-09	8.93195e-07	12385000	12390000	0	10000	26	1
Bomo_Chr3	12387500	BmNPV	52500	19	3.89442e-15	6.7524e-13	12385000	12390000	20000	85000	170	1
Bomo_Chr3	12387500	BmNPV	92500	23	8.90719e-20	1.80413e-17	12385000	12390000	90000	130000	116	1
Bomo_Chr3	12532500	BmNPV	42500	8	0.000161941	0.0122869	12530000	12535000	40000	45000	8	1
Bomo_Chr3	12667500	BmNPV	37500	8	0.000161941	0.0122869	12665000	12670000	35000	40000	8	1
Bomo_Chr3	13122500	BmNPV	32500	9	2.6311e-05	0.00226373	13120000	13125000	30000	35000	9	1
Bomo_Chr3	13687500	BmNPV	112500	8	0.000161941	0.0122869	13685000	13690000	110000	115000	8	1
Bomo_Chr3	14047500	BmNPV	77500	9	2.6311e-05	0.00226373	14045000	14050000	75000	80000	9	1
Bomo_Chr3	14267500	BmNPV	62500	8	0.000161941	0.0122869	14265000	14270000	60000	65000	8	1
Bomo_Chr4	82500	BmNPV	122500	8	0.000161941	0.0122869	80000	85000	120000	125000	8	1
Bomo_Chr4	1067500	BmNPV	62500	49	1.15952e-55	4.09994e-53	1065000	1070000	0	130000	852	1
Bomo_Chr4	1097500	BmNPV	122500	56	1.60927e-66	6.06859e-64	1095000	1100000	0	130000	876	1
Bomo_Chr4	1137500	BmNPV	92500	55	6.05227e-65	2.26411e-62	1135000	1145000	0	130000	1583	1
Bomo_Chr4	1417500	BmNPV	32500	8	0.000161941	0.0122869	1415000	1420000	30000	35000	8	1
Bomo_Chr4	1417500	BmNPV	97500	8	0.000161941	0.0122869	1415000	1420000	95000	100000	8	1
Bomo_Chr4	2007500	BmNPV	32500	8	0.000161941	0.0122869	2005000	2010000	30000	35000	8	1
Bomo_Chr4	2237500	BmNPV	92500	8	0.000161941	0.0122869	2235000	2240000	90000	95000	8	1
Bomo_Chr4	2237500	BmNPV	117500	8	0.000161941	0.0122869	2235000	2240000	115000	120000	8	1
Bomo_Chr4	2252500	BmNPV	82500	54	2.23558e-63	8.29362e-61	2250000	2255000	0	130000	909	1
Bomo_Chr4	2967500	BmNPV	62500	36	1.07686e-36	3.09954e-34	2965000	2970000	0	130000	688	1
Bomo_Chr4	3232500	BmNPV	22500	10	3.86084e-06	0.000370259	3230000	3240000	20000	30000	18	0.5
Bomo_Chr4	3232500	BmNPV	42500	10	3.86084e-06	0.000370259	3230000	3235000	40000	45000	10	1
Bomo_Chr4	3237500	BmNPV	67500	8	0.000161941	0.0122869	3235000	3240000	65000	70000	8	1
[truncated: 479 more rows]
