# Supplementary material for: Genome-wide chromatin interaction profiling reveals a vital role of super-enhancers and rearrangements in host enhancer contacts during BmNPV infection
Source: HighWire-hosted journal article supplement (doi:10.1101/gr.277931.123), 2023-10-23
Supplement: Supplemental_Table_S7.xlsx [file Supplemental_Table_S7.xlsx]

## Sheet: merged_v2v_p0_interaction_q0.05
Supplemental Table S7. List of the significant interactions in the genome of BmNPV.
chr1	mid1	chr2	mid2	CC	p	fdr	bin1_low	bin1_high	bin2_low	bin2_high	sumCC	StrongConn
BmNPV	225	BmNPV	325	197	3.03028e-17	4.12722e-13	200	250	300	350	197	1
BmNPV	325	BmNPV	625	56	1.22458e-15	1.4704e-11	300	350	600	650	56	1
BmNPV	1225	BmNPV	1425	69	6.57249e-11	5.4774e-07	1200	1250	1400	1450	69	1
BmNPV	2225	BmNPV	2575	38	2.4506e-09	1.79694e-05	2200	2250	2550	2600	38	1
BmNPV	2625	BmNPV	2775	88	3.936e-13	3.94321e-09	2550	2650	2700	2800	372	1
BmNPV	2775	BmNPV	2925	87	1.02167e-14	1.16119e-10	2750	2800	2900	2950	87	1
BmNPV	2825	BmNPV	29125	75	2.75191e-10	2.18827e-06	2800	2850	29100	29150	75	1
BmNPV	2825	BmNPV	61725	78	6.91564e-06	0.0378012	2800	2850	61700	61750	78	1
BmNPV	2825	BmNPV	87625	89	2.46626e-07	0.00155131	2800	2850	87600	87650	89	1
BmNPV	2825	BmNPV	114375	87	1.93266e-06	0.0112447	2800	2850	114350	114400	87	1
BmNPV	2825	BmNPV	115875	97	8.94729e-13	8.71212e-09	2800	2850	115850	115950	177	1
BmNPV	3525	BmNPV	3725	75	5.18318e-10	4.01974e-06	3500	3550	3700	3750	75	1
BmNPV	3725	BmNPV	3975	69	9.68767e-20	1.56141e-15	3650	3750	3950	4050	172	0.75
BmNPV	4125	BmNPV	4225	334	4.0999e-81	1.68917e-75	4100	4150	4200	4250	334	1
BmNPV	5375	BmNPV	5475	207	4.36562e-21	7.71539e-17	5350	5400	5450	5500	207	1
BmNPV	5575	BmNPV	18275	38	5.01999e-10	3.89777e-06	5550	5600	18250	18300	38	1
BmNPV	6725	BmNPV	6825	235	2.36188e-44	1.67416e-39	6700	6750	6800	6850	235	1
BmNPV	6725	BmNPV	6925	152	3.26717e-21	5.82091e-17	6700	6750	6900	6950	152	1
BmNPV	7325	BmNPV	7525	75	1.33125e-14	1.49756e-10	7300	7400	7450	7550	342	1
BmNPV	7475	BmNPV	7575	166	5.28641e-45	3.91554e-40	7450	7550	7550	7650	462	0.75
BmNPV	7575	BmNPV	7725	124	3.93685e-25	8.9182e-21	7500	7650	7700	7800	443	0.833333
BmNPV	8675	BmNPV	8775	188	1.17055e-59	1.64178e-54	8600	8700	8700	8800	490	0.75
BmNPV	8675	BmNPV	9175	31	7.87513e-10	5.99461e-06	8650	8700	9150	9200	31	1
BmNPV	8775	BmNPV	8875	152	5.38977e-39	2.91227e-34	8650	8800	8850	9000	778	0.888889
BmNPV	8875	BmNPV	8975	191	1.46891e-63	2.93429e-58	8850	8950	8950	9050	509	0.75
BmNPV	8925	BmNPV	9125	148	1.77983e-53	1.89237e-48	8850	9050	9100	9200	684	1
BmNPV	9575	BmNPV	9675	112	3.13933e-07	0.00195786	9550	9600	9650	9800	235	1
BmNPV	9675	BmNPV	9775	191	1.45148e-36	6.93352e-32	9650	9700	9750	9800	191	1
BmNPV	10275	BmNPV	10475	165	2.77738e-61	4.25783e-56	10250	10350	10400	10550	415	0.666667
BmNPV	10275	BmNPV	18275	19	1.09902e-06	0.00658022	10250	10300	18250	18300	19	1
BmNPV	10425	BmNPV	10525	180	6.76789e-46	5.44077e-41	10400	10450	10500	10550	180	1
BmNPV	10475	BmNPV	18275	20	2.44764e-06	0.0140426	10450	10500	18250	18300	20	1
BmNPV	11475	BmNPV	11675	85	2.82673e-10	2.23966e-06	11450	11500	11600	11700	208	1
BmNPV	11675	BmNPV	11775	150	3.4547e-15	4.08128e-11	11600	11700	11750	11900	398	0.666667
BmNPV	11825	BmNPV	11925	204	4.86799e-46	3.96173e-41	11750	11850	11850	11950	409	0.5
BmNPV	11875	BmNPV	12125	104	4.00127e-24	8.56384e-20	11800	11900	12100	12150	161	1
BmNPV	11925	BmNPV	12025	169	8.39725e-28	2.32585e-23	11800	11950	12000	12050	389	1
BmNPV	12025	BmNPV	12125	199	8.24576e-40	4.76812e-35	12000	12050	12100	12150	199	1
BmNPV	12125	BmNPV	12275	195	3.91154e-41	2.47934e-36	12100	12150	12200	12300	315	1
BmNPV	13325	BmNPV	13525	77	1.61136e-14	1.80342e-10	13300	13400	13450	13550	279	0.75
BmNPV	13325	BmNPV	13825	37	1.79879e-09	1.33835e-05	13300	13350	13800	13850	37	1
BmNPV	13325	BmNPV	14025	20	5.945e-07	0.00361529	13300	13350	14000	14050	20	1
BmNPV	13825	BmNPV	13975	99	2.02133e-06	0.0117295	13800	13850	13950	14000	99	1
BmNPV	13925	BmNPV	14025	200	8.44326e-49	8.06644e-44	13900	13950	14000	14050	200	1
BmNPV	15975	BmNPV	16175	89	8.76525e-28	2.41762e-23	15950	16050	16100	16200	427	1
BmNPV	16025	BmNPV	16325	48	3.3894e-07	0.00210784	16000	16050	16300	16350	48	1
BmNPV	16175	BmNPV	16325	134	3.34491e-28	9.38292e-24	16100	16200	16300	16400	384	1
BmNPV	16375	BmNPV	16525	106	3.7406e-07	0.00231969	16300	16400	16500	16550	177	1
BmNPV	16475	BmNPV	16575	178	1.37132e-34	5.98662e-30	16450	16500	16550	16600	178	1
BmNPV	17625	BmNPV	17725	203	4.34783e-18	6.35502e-14	17600	17650	17700	17750	203	1
BmNPV	17825	BmNPV	17925	210	1.66097e-48	1.52072e-43	17800	17850	17900	17950	210	1
BmNPV	18275	BmNPV	18375	190	1.04991e-39	5.96645e-35	18250	18300	18350	18400	190	1
BmNPV	18275	BmNPV	47625	93	2.86579e-74	8.99593e-69	18250	18300	47600	47650	93	1
BmNPV	18325	BmNPV	18475	91	3.0291e-07	0.0018927	18300	18350	18450	18500	91	1
BmNPV	18475	BmNPV	18675	62	3.0902e-07	0.00192905	18450	18500	18650	18700	62	1
BmNPV	18675	BmNPV	18775	82	1.3509e-11	1.19533e-07	18650	18700	18750	18800	82	1
BmNPV	20825	BmNPV	20925	180	1.49169e-39	8.33333e-35	20800	20850	20900	20950	180	1
BmNPV	21025	BmNPV	78325	103	5.93524e-71	1.56502e-65	21000	21100	78300	78350	161	1
BmNPV	21025	BmNPV	78425	29	7.62408e-08	0.000498101	21000	21050	78400	78450	29	1
BmNPV	21025	BmNPV	127075	28	7.52277e-07	0.00454542	21000	21050	127050	127100	28	1
BmNPV	21075	BmNPV	78175	41	1.19535e-18	1.79087e-14	21000	21100	78100	78200	107	0.75
BmNPV	22475	BmNPV	23125	34	2.07215e-14	2.28806e-10	22450	22500	23100	23150	34	1
BmNPV	22475	BmNPV	24275	20	4.2222e-06	0.0236273	22450	22500	24250	24300	20	1
BmNPV	22475	BmNPV	65075	26	1.9874e-08	0.000136186	22450	22500	65000	65100	48	1
BmNPV	22475	BmNPV	65225	26	3.76476e-11	3.19402e-07	22450	22500	65200	65250	26	1
BmNPV	22475	BmNPV	86475	19	1.3296e-06	0.00789619	22450	22500	86450	86500	19	1
BmNPV	22475	BmNPV	107025	19	5.30212e-06	0.0293221	22450	22500	107000	107050	19	1
BmNPV	22475	BmNPV	107425	21	2.19593e-07	0.00139056	22450	22500	107400	107450	21	1
BmNPV	22475	BmNPV	107575	19	1.6263e-07	0.00103983	22450	22500	107550	107650	35	1
BmNPV	22475	BmNPV	124025	21	3.17997e-06	0.017932	22450	22500	124000	124050	21	1
BmNPV	22975	BmNPV	23125	95	2.203e-12	2.06283e-08	22950	23050	23100	23150	229	1
BmNPV	22975	BmNPV	24225	58	9.19443e-40	5.27045e-35	22950	23050	24200	24300	214	1
BmNPV	22975	BmNPV	65075	59	1.44735e-35	6.6257e-31	22950	23050	64950	65100	327	1
BmNPV	22975	BmNPV	65225	45	3.51638e-28	9.82209e-24	22950	23050	65150	65250	208	1
BmNPV	22975	BmNPV	65375	39	2.45967e-24	5.35124e-20	22950	23050	65350	65400	84	1
BmNPV	22975	BmNPV	86475	55	1.06501e-38	5.57193e-34	22950	23050	86350	86500	227	1
BmNPV	22975	BmNPV	107375	75	1.56744e-41	1.02304e-36	22950	23050	107350	107500	348	1
BmNPV	22975	BmNPV	107575	39	7.38919e-25	1.64561e-20	22950	23050	107550	107650	138	1
BmNPV	22975	BmNPV	124025	55	1.43667e-33	5.77477e-29	22950	23050	124000	124050	123	1
BmNPV	22975	BmNPV	124225	56	2.19095e-31	7.6015e-27	22950	23050	124200	124300	186	1
BmNPV	23025	BmNPV	23275	69	1.37963e-08	9.56322e-05	22950	23050	23200	23300	248	1
BmNPV	23025	BmNPV	24375	42	3.36183e-13	3.39898e-09	23000	23050	24350	24400	42	1
BmNPV	23025	BmNPV	90025	35	2.95167e-08	0.000198142	23000	23050	90000	90050	35	1
BmNPV	23025	BmNPV	106925	33	7.53501e-12	6.80428e-08	22950	23050	106900	106950	54	1
BmNPV	23025	BmNPV	107125	63	1.17857e-27	3.22373e-23	22950	23050	107050	107250	302	1
BmNPV	23025	BmNPV	123825	74	7.06239e-27	1.81858e-22	22950	23050	123700	123850	281	1
BmNPV	23025	BmNPV	123925	69	7.28379e-34	2.98231e-29	22950	23050	123900	123950	116	1
BmNPV	23025	BmNPV	124125	61	3.07909e-28	8.67415e-24	22950	23050	124100	124150	107	1
BmNPV	23025	BmNPV	124375	45	7.0976e-10	5.41525e-06	23000	23050	124350	124400	45	1
BmNPV	23125	BmNPV	23225	156	4.67514e-32	1.66588e-27	23100	23150	23200	23300	270	1
BmNPV	23125	BmNPV	24225	48	1.44019e-28	4.14578e-24	23100	23150	24200	24300	78	1
BmNPV	23125	BmNPV	65075	43	2.60056e-20	4.3621e-16	23100	23150	64950	65100	108	1
BmNPV	23125	BmNPV	65225	38	9.51904e-21	1.65043e-16	23100	23150	65150	65250	80	1
BmNPV	23125	BmNPV	65375	18	1.29638e-06	0.00771982	23100	23150	65350	65400	18	1
BmNPV	23125	BmNPV	86475	25	1.72243e-10	1.39317e-06	23100	23150	86350	86500	72	1
BmNPV	23125	BmNPV	107125	32	1.0636e-12	1.02805e-08	23100	23150	107100	107150	32	1
BmNPV	23125	BmNPV	107225	35	3.24652e-13	3.28744e-09	23100	23150	107200	107250	35	1
BmNPV	23125	BmNPV	107375	54	1.1312e-22	2.23932e-18	23100	23150	107350	107500	103	1
BmNPV	23125	BmNPV	107625	20	2.32368e-08	0.000157428	23100	23150	107550	107650	38	1
BmNPV	23125	BmNPV	123725	18	8.34795e-06	0.0454128	23100	23150	123700	123750	18	1
BmNPV	23125	BmNPV	123825	34	5.85118e-10	4.50074e-06	23100	23150	123800	123850	34	1
BmNPV	23125	BmNPV	123925	36	2.54438e-16	3.25053e-12	23100	23150	123900	123950	36	1
BmNPV	23125	BmNPV	124025	38	1.36129e-17	1.90121e-13	23100	23150	124000	124050	38	1
BmNPV	23125	BmNPV	124125	38	2.01048e-18	2.98496e-14	23100	23150	124100	124150	38	1
BmNPV	23125	BmNPV	124225	61	1.1161e-34	4.97122e-30	23100	23150	124200	124300	90	1
BmNPV	23225	BmNPV	24225	36	3.58847e-16	4.50579e-12	23200	23300	24200	24300	123	1
BmNPV	23225	BmNPV	64975	27	7.67703e-11	6.38176e-07	23200	23300	64950	65100	150	1
BmNPV	23225	BmNPV	65225	37	4.90724e-18	7.13144e-14	23200	23300	65150	65250	87	0.75
BmNPV	23225	BmNPV	86425	39	2.95947e-20	4.92651e-16	23200	23300	86350	86500	187	1
BmNPV	23225	BmNPV	106925	24	2.49615e-09	1.82831e-05	23200	23250	106900	106950	24	1
BmNPV	23225	BmNPV	107025	36	3.9961e-16	4.99858e-12	23200	23300	107000	107150	116	0.666667
BmNPV	23225	BmNPV	107375	31	9.05512e-07	0.00545131	23200	23250	107350	107400	31	1
BmNPV	23225	BmNPV	107575	39	5.51534e-22	1.05079e-17	23200	23300	107550	107650	79	0.75
BmNPV	23275	BmNPV	23375	118	7.23843e-17	9.58155e-13	23200	23300	23350	23400	222	1
BmNPV	23275	BmNPV	107225	30	7.91202e-11	6.56056e-07	23250	23300	107200	107250	30	1
BmNPV	23275	BmNPV	123725	18	2.72966e-06	0.0154988	23250	23300	123700	123750	18	1
BmNPV	23275	BmNPV	123925	29	4.41066e-12	4.0608e-08	23200	23300	123900	123950	60	1
BmNPV	23275	BmNPV	124025	33	8.40185e-15	9.63225e-11	23200	23300	124000	124050	55	1
BmNPV	23275	BmNPV	124125	29	1.76962e-12	1.66888e-08	23200	23300	124100	124150	58	1
BmNPV	23275	BmNPV	124225	44	1.83117e-21	3.34381e-17	23200	23300	124200	124300	147	1
BmNPV	23275	BmNPV	124375	33	2.60414e-10	2.07828e-06	23250	23300	124350	124400	33	1
BmNPV	23375	BmNPV	23625	67	9.67902e-09	6.76613e-05	23350	23400	23600	23650	67	1
BmNPV	23625	BmNPV	23875	56	1.14258e-08	7.9619e-05	23600	23650	23850	23900	56	1
BmNPV	23875	BmNPV	107475	17	7.73948e-06	0.0422343	23850	23900	107450	107500	17	1
BmNPV	24225	BmNPV	65075	67	1.69301e-42	1.15056e-37	24200	24300	64950	65100	283	1
BmNPV	24225	BmNPV	65225	48	1.84938e-30	6.09562e-26	24200	24300	65150	65250	177	1
BmNPV	24225	BmNPV	65375	22	1.99153e-09	1.47674e-05	24200	24300	65350	65400	40	1
BmNPV	24225	BmNPV	86475	40	4.68887e-23	9.56944e-19	24200	24300	86350	86500	130	0.666667
BmNPV	24225	BmNPV	106925	31	3.67851e-16	4.61007e-12	24200	24250	106900	106950	31	1
BmNPV	24225	BmNPV	107125	43	2.09614e-21	3.80658e-17	24200	24300	107100	107250	172	1
BmNPV	24225	BmNPV	107425	46	1.41226e-27	3.81546e-23	24200	24300	107350	107500	265	1
BmNPV	24225	BmNPV	107575	37	2.21929e-22	4.30285e-18	24200	24300	107550	107650	119	1
BmNPV	24225	BmNPV	123775	54	2.02194e-35	9.12925e-31	24200	24300	123700	123850	240	1
BmNPV	24225	BmNPV	123925	70	1.97463e-48	1.78313e-43	24200	24300	123900	123950	115	1
BmNPV	24225	BmNPV	124025	49	3.19687e-27	8.39601e-23	24200	24300	124000	124050	93	1
BmNPV	24225	BmNPV	124225	42	6.94115e-19	1.05918e-14	24200	24300	124200	124250	71	1
BmNPV	24275	BmNPV	24375	150	5.15305e-26	1.23077e-21	24200	24300	24350	24400	246	1
BmNPV	24275	BmNPV	124125	43	1.07235e-21	1.99127e-17	24200	24300	124100	124150	77	1
BmNPV	24375	BmNPV	24475	134	3.88744e-06	0.021791	24350	24400	24450	24500	134	1
BmNPV	24475	BmNPV	24725	65	1.53619e-07	0.000984126	24450	24500	24700	24750	65	1
BmNPV	24725	BmNPV	24975	53	8.73949e-11	7.21945e-07	24700	24800	24950	25000	146	1
BmNPV	24875	BmNPV	24975	197	5.19073e-66	1.17992e-60	24850	24900	24950	25050	320	1
BmNPV	24875	BmNPV	25225	31	5.05148e-07	0.00308616	24850	24900	25200	25250	31	1
BmNPV	24975	BmNPV	25075	200	1.66891e-29	5.1409e-25	24950	25000	25050	25100	200	1
BmNPV	25025	BmNPV	25225	85	8.83472e-19	1.33576e-14	24950	25050	25200	25250	125	1
BmNPV	25175	BmNPV	25275	212	7.37259e-09	5.22395e-05	25150	25200	25250	25300	212	1
BmNPV	25275	BmNPV	25375	241	2.76344e-63	5.20479e-58	25200	25300	25350	25400	373	1
BmNPV	25375	BmNPV	25625	62	8.4669e-12	7.6145e-08	25350	25400	25600	25650	62	1
BmNPV	25525	BmNPV	25625	184	2.08154e-58	2.74432e-53	25450	25550	25600	25700	468	0.75
BmNPV	25625	BmNPV	25725	221	1.41716e-46	1.18253e-41	25600	25650	25700	25750	221	1
BmNPV	25825	BmNPV	29125	58	2.61669e-08	0.000176374	25800	25850	29100	29150	58	1
BmNPV	25825	BmNPV	87625	70	2.0288e-08	0.00013859	25800	25850	87600	87650	70	1
BmNPV	26575	BmNPV	26675	106	1.14065e-14	1.29196e-10	26550	26600	26650	26700	106	1
BmNPV	27325	BmNPV	27475	156	2.32472e-50	2.35764e-45	27250	27350	27450	27550	430	1
BmNPV	27325	BmNPV	27625	51	3.22909e-09	2.34689e-05	27300	27350	27600	27650	51	1
BmNPV	27475	BmNPV	27675	63	8.68734e-13	8.50928e-09	27450	27550	27650	27700	148	1
BmNPV	27675	BmNPV	27875	90	4.525e-24	9.65342e-20	27600	27700	27850	27900	148	1
BmNPV	27875	BmNPV	28075	63	1.91322e-09	1.42188e-05	27850	27950	28000	28100	271	0.75
BmNPV	28075	BmNPV	28175	129	2.51878e-13	2.56234e-09	28000	28100	28150	28250	285	0.75
BmNPV	28625	BmNPV	28775	115	2.56693e-24	5.56622e-20	28600	28700	28750	28800	233	1
BmNPV	28925	BmNPV	29025	193	3.54887e-34	1.49008e-29	28900	28950	29000	29050	193	1
BmNPV	29025	BmNPV	29125	168	3.75375e-09	2.71326e-05	29000	29050	29100	29150	168	1
BmNPV	29225	BmNPV	29325	219	2.233e-45	1.73177e-40	29200	29250	29300	29350	219	1
BmNPV	30075	BmNPV	30175	180	1.27183e-09	9.58166e-06	30050	30100	30150	30200	180	1
BmNPV	30325	BmNPV	30625	50	3.79492e-09	2.74001e-05	30300	30350	30600	30650	50	1
BmNPV	31575	BmNPV	31675	152	1.01137e-17	1.42763e-13	31550	31600	31650	31700	152	1
BmNPV	31675	BmNPV	31875	77	2.68101e-10	2.13446e-06	31650	31700	31850	31900	77	1
BmNPV	32925	BmNPV	33075	93	2.28044e-12	2.13231e-08	32900	32950	33000	33100	225	1
BmNPV	33075	BmNPV	33225	150	1.12284e-40	6.98285e-36	33000	33100	33200	33300	321	0.75
BmNPV	33225	BmNPV	33325	175	2.24863e-45	1.73177e-40	33200	33250	33300	33350	175	1
BmNPV	33275	BmNPV	33525	42	1.17102e-07	0.000757549	33250	33300	33500	33550	42	1
BmNPV	33475	BmNPV	33575	187	2.31792e-62	3.91791e-57	33400	33550	33500	33650	810	0.555556
BmNPV	33775	BmNPV	33975	58	2.4693e-08	0.00016678	33750	33800	33950	34000	58	1
BmNPV	33975	BmNPV	34175	57	2.07883e-06	0.0120419	33950	34000	34150	34200	57	1
BmNPV	34175	BmNPV	34275	196	3.65374e-57	4.22555e-52	34100	34200	34250	34300	340	1
BmNPV	34175	BmNPV	34425	67	1.73147e-12	1.63523e-08	34150	34200	34350	34500	189	1
BmNPV	34275	BmNPV	34475	65	1.392e-10	1.13567e-06	34250	34300	34350	34500	255	1
BmNPV	34375	BmNPV	34475	181	1.1748e-40	7.23768e-36	34350	34400	34450	34500	181	1
BmNPV	35675	BmNPV	35825	75	5.03171e-06	0.0279438	35650	35700	35800	35850	75	1
BmNPV	36425	BmNPV	36525	106	1.05456e-11	9.42707e-08	36400	36450	36500	36650	278	1
BmNPV	36575	BmNPV	36675	424	5.62646e-252	1.23633e-245	36500	36600	36600	36700	767	0.75
BmNPV	36625	BmNPV	36875	100	1.80039e-40	1.07894e-35	36500	36700	36750	36900	868	0.916667
BmNPV	36775	BmNPV	36875	493	0	0	36750	36800	36850	36900	493	1
BmNPV	36825	BmNPV	37075	57	7.35831e-12	6.67354e-08	36800	36900	37000	37100	294	1
BmNPV	37725	BmNPV	37925	67	2.0776e-08	0.000141777	37700	37750	37900	37950	67	1
BmNPV	38575	BmNPV	38675	130	3.53752e-17	4.78841e-13	38500	38600	38650	38750	380	1
BmNPV	39275	BmNPV	39375	183	2.1413e-25	4.95282e-21	39250	39300	39350	39400	183	1
BmNPV	39525	BmNPV	39875	50	1.02959e-16	1.33342e-12	39500	39550	39850	39900	50	1
BmNPV	39875	BmNPV	39975	230	3.94254e-36	1.83024e-31	39850	39900	39950	40000	230	1
BmNPV	39875	BmNPV	40075	72	9.10702e-06	0.0492082	39850	39900	40050	40100	72	1
BmNPV	39925	BmNPV	40175	64	6.16678e-09	4.38058e-05	39900	39950	40150	40200	64	1
BmNPV	40075	BmNPV	40175	148	1.88618e-14	2.09676e-10	40050	40100	40150	40250	256	1
BmNPV	40175	BmNPV	40275	215	6.97386e-44	4.89064e-39	40150	40200	40250	40300	215	1
BmNPV	40275	BmNPV	40375	123	9.48573e-13	9.2092e-09	40200	40300	40350	40450	300	0.75
BmNPV	40375	BmNPV	102025	20	8.45689e-07	0.00509582	40350	40400	102000	102050	20	1
BmNPV	40425	BmNPV	40525	160	2.26496e-26	5.55046e-22	40350	40450	40500	40550	258	1
BmNPV	40425	BmNPV	40625	75	4.7997e-08	0.00031767	40350	40450	40600	40650	121	1
BmNPV	40525	BmNPV	40625	140	8.86088e-26	2.08612e-21	40500	40550	40600	40650	140	1
BmNPV	40625	BmNPV	40825	74	3.24515e-15	3.84062e-11	40600	40650	40750	40850	159	1
BmNPV	40725	BmNPV	40825	217	7.44105e-61	1.09004e-55	40700	40750	40800	40850	217	1
BmNPV	40825	BmNPV	41025	100	1.69682e-31	5.91827e-27	40750	40850	41000	41050	167	1
BmNPV	41575	BmNPV	41675	197	1.65721e-71	4.74975e-66	41550	41600	41650	41700	197	1
BmNPV	41575	BmNPV	41825	45	1.37544e-07	0.000883723	41550	41600	41800	41850	45	1
BmNPV	41675	BmNPV	41825	83	2.62973e-06	0.014983	41650	41700	41800	41850	83	1
BmNPV	41825	BmNPV	41925	149	1.39311e-24	3.06116e-20	41800	41850	41900	41950	149	1
BmNPV	41925	BmNPV	42225	56	3.38437e-11	2.87871e-07	41900	41950	42200	42250	56	1
BmNPV	42575	BmNPV	42825	62	7.69296e-14	8.08811e-10	42550	42650	42800	42850	143	1
BmNPV	42825	BmNPV	42925	225	1.52351e-50	1.56922e-45	42800	42850	42900	42950	225	1
BmNPV	42875	BmNPV	43075	54	2.21014e-06	0.012769	42850	42900	43050	43100	54	1
BmNPV	43075	BmNPV	43375	37	3.03366e-06	0.0171657	43050	43100	43350	43400	37	1
BmNPV	43375	BmNPV	43475	149	5.50628e-29	1.65743e-24	43350	43400	43450	43500	149	1
BmNPV	44175	BmNPV	44375	67	5.41061e-06	0.0298719	44150	44200	44350	44400	67	1
BmNPV	44325	BmNPV	44425	200	4.03281e-47	3.45253e-42	44300	44350	44400	44450	200	1
BmNPV	44425	BmNPV	44725	54	1.25273e-15	1.50146e-11	44400	44450	44700	44750	54	1
BmNPV	44725	BmNPV	44825	161	6.5158e-39	3.49207e-34	44700	44750	44800	44850	161	1
BmNPV	44825	BmNPV	44925	116	4.39588e-08	0.000291822	44800	44850	44900	44950	116	1
BmNPV	46075	BmNPV	46175	186	7.74924e-40	4.52065e-35	46050	46100	46150	46200	186	1
BmNPV	46075	BmNPV	46275	64	2.37264e-12	2.21538e-08	46050	46200	46250	46300	278	1
BmNPV	46125	BmNPV	46425	51	9.26286e-11	7.64222e-07	46100	46200	46400	46450	113	1
BmNPV	46275	BmNPV	46425	225	1.20135e-100	7.91939e-95	46250	46300	46400	46500	315	1
BmNPV	46425	BmNPV	46775	38	1.74558e-10	1.41017e-06	46400	46450	46750	46800	38	1
BmNPV	46475	BmNPV	46575	140	8.68397e-27	2.21024e-22	46400	46500	46550	46600	235	1
BmNPV	46575	BmNPV	46775	67	3.09177e-09	2.25704e-05	46550	46600	46750	46800	67	1
BmNPV	46775	BmNPV	46925	109	5.51736e-23	1.12255e-18	46750	46800	46850	46950	261	1
BmNPV	46875	BmNPV	46975	200	1.56862e-19	2.50374e-15	46850	46900	46950	47000	200	1
BmNPV	46925	BmNPV	47125	65	1.66363e-08	0.000114595	46900	46950	47050	47150	157	1
BmNPV	47625	BmNPV	47775	109	1.97205e-10	1.58342e-06	47600	47650	47750	47800	109	1
BmNPV	47775	BmNPV	47875	147	1.12052e-19	1.80159e-15	47750	47800	47850	47900	147	1
BmNPV	47775	BmNPV	47975	94	5.61044e-09	4.01567e-05	47750	47800	47950	48000	94	1
BmNPV	47875	BmNPV	47975	144	8.4351e-06	0.0458029	47850	47900	47950	48000	144	1
BmNPV	48025	BmNPV	48175	191	5.00685e-71	1.37523e-65	47950	48050	48150	48200	300	1
BmNPV	48025	BmNPV	48275	84	2.14138e-12	2.01084e-08	48000	48050	48250	48350	127	1
BmNPV	48175	BmNPV	48325	83	3.38243e-12	3.13163e-08	48150	48200	48300	48400	156	1
BmNPV	48175	BmNPV	48575	39	1.7963e-10	1.44936e-06	48150	48200	48550	48600	39	1
BmNPV	48275	BmNPV	48375	220	1.62136e-30	5.37091e-26	48250	48300	48350	48400	220	1
BmNPV	48325	BmNPV	48575	61	2.44565e-13	2.49564e-09	48300	48400	48550	48650	206	0.75
BmNPV	48375	BmNPV	48475	221	3.46667e-79	1.26958e-73	48300	48400	48450	48500	333	1
BmNPV	48475	BmNPV	48575	123	5.29115e-25	1.19451e-20	48450	48500	48550	48600	123	1
BmNPV	48625	BmNPV	48725	166	1.99197e-18	2.96414e-14	48550	48650	48700	48800	484	1
BmNPV	49525	BmNPV	49675	106	3.26268e-16	4.13611e-12	49500	49550	49650	49700	106	1
BmNPV	49675	BmNPV	49925	55	8.12721e-10	6.16514e-06	49650	49700	49900	49950	55	1
BmNPV	49925	BmNPV	50025	114	7.94479e-12	7.1645e-08	49900	49950	50000	50050	114	1
BmNPV	50925	BmNPV	51075	92	7.26466e-14	7.67452e-10	50900	51000	51050	51100	199	1
BmNPV	51075	BmNPV	51275	65	6.87304e-12	6.25794e-08	51050	51100	51200	51300	161	1
BmNPV	51275	BmNPV	51525	71	3.84989e-18	5.63971e-14	51200	51300	51500	51550	116	1
BmNPV	51525	BmNPV	51675	90	4.25654e-11	3.60197e-07	51500	51550	51650	51700	90	1
BmNPV	51525	BmNPV	51825	38	3.60783e-06	0.0202581	51500	51550	51800	51850	38	1
BmNPV	51525	BmNPV	52775	19	2.41755e-06	0.0138821	51500	51550	52750	52800	19	1
BmNPV	51675	BmNPV	51825	203	5.07203e-82	2.22901e-76	51650	51700	51800	51900	301	1
BmNPV	51825	BmNPV	51975	98	5.08334e-09	3.64236e-05	51800	51900	51950	52000	215	1
BmNPV	51825	BmNPV	52075	40	3.24963e-06	0.0183092	51800	51900	52050	52100	103	1
BmNPV	51975	BmNPV	52075	187	1.32721e-51	1.38874e-46	51950	52000	52050	52100	187	1
BmNPV	51975	BmNPV	52175	89	9.18502e-12	8.22665e-08	51950	52000	52150	52200	89	1
BmNPV	52075	BmNPV	52175	270	2.47045e-123	2.03566e-117	52050	52100	52150	52200	270	1
BmNPV	52075	BmNPV	52275	87	5.5294e-11	4.63742e-07	52050	52100	52250	52300	87	1
BmNPV	52075	BmNPV	52375	36	2.69165e-07	0.00168665	52050	52100	52350	52400	36	1
BmNPV	52175	BmNPV	52275	134	4.58803e-12	4.20648e-08	52150	52200	52250	52300	134	1
BmNPV	52175	BmNPV	52425	95	6.47763e-30	2.07286e-25	52150	52200	52350	52450	164	1
BmNPV	52275	BmNPV	52375	220	6.54057e-55	7.43376e-50	52250	52300	52350	52500	517	1
BmNPV	52375	BmNPV	52475	178	9.14813e-50	8.86838e-45	52350	52400	52450	52500	178	1
BmNPV	52375	BmNPV	52625	61	7.88434e-13	7.75731e-09	52350	52450	52600	52650	120	1
BmNPV	52675	BmNPV	52775	138	2.29886e-31	7.93414e-27	52600	52700	52750	52800	236	1
BmNPV	52775	BmNPV	53225	63	2.19045e-28	6.27807e-24	52750	52800	53200	53250	63	1
BmNPV	53225	BmNPV	53325	165	7.87778e-34	3.2056e-29	53200	53250	53300	53350	165	1
BmNPV	53675	BmNPV	53775	330	1.33258e-136	1.46407e-130	53650	53700	53750	53850	431	1
BmNPV	54275	BmNPV	54375	159	4.20965e-28	1.1709e-23	54200	54300	54350	54400	271	1
BmNPV	54375	BmNPV	54525	123	1.20306e-27	3.27712e-23	54350	54400	54500	54600	196	1
BmNPV	54525	BmNPV	54675	81	1.69569e-06	0.00994495	54500	54550	54650	54700	81	1
BmNPV	54675	BmNPV	54875	81	1.43588e-09	1.07684e-05	54650	54700	54850	54900	81	1
BmNPV	55025	BmNPV	55225	81	1.63006e-09	1.21555e-05	54950	55050	55200	55250	159	1
BmNPV	55225	BmNPV	55325	122	4.3763e-16	5.44317e-12	55200	55250	55300	55350	122	1
BmNPV	57225	BmNPV	57325	202	7.36989e-09	5.22395e-05	57200	57250	57300	57350	202	1
BmNPV	58625	BmNPV	58875	66	2.93958e-11	2.51661e-07	58550	58650	58700	58900	306	0.625
BmNPV	58775	BmNPV	58875	207	1.66293e-77	5.48106e-72	58700	58850	58800	58950	986	0.666667
BmNPV	58875	BmNPV	59075	74	1.01523e-08	7.08197e-05	58850	58900	59050	59100	74	1
BmNPV	58875	BmNPV	59175	54	2.18809e-13	2.23975e-09	58850	58900	59150	59200	54	1
BmNPV	59075	BmNPV	59175	293	4.48482e-110	3.28491e-104	59050	59100	59150	59200	293	1
BmNPV	59075	BmNPV	59325	55	5.65663e-08	0.000371403	59050	59100	59300	59350	55	1
BmNPV	59175	BmNPV	59325	79	6.97e-07	0.00422303	59150	59200	59300	59350	79	1
BmNPV	60525	BmNPV	60725	100	2.5968e-30	8.51654e-26	60450	60550	60700	60800	237	0.75
BmNPV	60775	BmNPV	60875	129	1.33821e-07	0.000861478	60700	60800	60850	60900	214	1
BmNPV	60875	BmNPV	60975	185	1.41315e-32	5.29295e-28	60850	60900	60950	61000	185	1
BmNPV	60975	BmNPV	61075	125	5.42873e-17	7.22959e-13	60950	61000	61050	61100	125	1
BmNPV	62075	BmNPV	62175	195	1.08272e-27	2.9739e-23	62050	62100	62150	62200	195	1
BmNPV	62175	BmNPV	62475	51	6.16226e-11	5.14854e-07	62100	62200	62450	62500	92	1
BmNPV	62675	BmNPV	62925	90	3.94767e-31	1.3414e-26	62650	62700	62900	63000	132	1
BmNPV	63275	BmNPV	63425	138	7.49089e-22	1.41087e-17	63250	63300	63400	63450	138	1
BmNPV	64375	BmNPV	64475	193	1.43123e-22	2.79963e-18	64350	64400	64450	64500	193	1
BmNPV	64575	BmNPV	64675	200	9.69086e-46	7.60508e-41	64550	64600	64650	64700	200	1
BmNPV	64675	BmNPV	64975	56	2.4784e-17	3.38958e-13	64650	64700	64950	65000	56	1
BmNPV	64975	BmNPV	65075	173	5.98655e-30	1.93246e-25	64950	65000	65050	65100	173	1
BmNPV	64975	BmNPV	65225	74	6.77902e-18	9.71471e-14	64950	65100	65150	65250	362	0.666667
BmNPV	65025	BmNPV	65375	51	3.77326e-13	3.7917e-09	64950	65050	65350	65400	87	1
BmNPV	65025	BmNPV	86475	50	7.42357e-29	2.20435e-24	64950	65100	86350	86500	286	0.888889
BmNPV	65025	BmNPV	106925	28	1.0876e-11	9.7016e-08	64950	65100	106900	106950	71	1
BmNPV	65025	BmNPV	107225	52	7.95453e-23	1.59382e-18	64950	65100	107050	107250	493	1
BmNPV	65025	BmNPV	107575	45	8.4812e-27	2.167e-22	64950	65100	107550	107650	214	1
BmNPV	65025	BmNPV	123825	89	6.01176e-48	5.28398e-43	64950	65100	123700	123850	503	1
BmNPV	65025	BmNPV	124025	69	2.06765e-41	1.33628e-36	64950	65100	124000	124050	186	1
BmNPV	65025	BmNPV	124125	55	7.62373e-30	2.41616e-25	64950	65100	124100	124150	137	1
BmNPV	65025	BmNPV	124225	63	2.88008e-32	1.04317e-27	64950	65100	124200	124300	270	1
BmNPV	65075	BmNPV	107375	82	9.67475e-36	4.45989e-31	64950	65100	107350	107500	508	1
BmNPV	65075	BmNPV	123925	74	3.38349e-42	2.27593e-37	64950	65100	123900	123950	179	1
BmNPV	65175	BmNPV	90025	31	4.56495e-06	0.0254515	65150	65200	90000	90050	31	1
BmNPV	65175	BmNPV	106925	30	1.44332e-09	1.08119e-05	65150	65250	106900	106950	49	1
BmNPV	65175	BmNPV	124375	46	8.01002e-10	6.09025e-06	65150	65200	124350	124400	46	1
BmNPV	65225	BmNPV	65375	123	7.88962e-24	1.6777e-19	65200	65250	65350	65400	123	1
BmNPV	65225	BmNPV	65475	52	4.56362e-06	0.0254515	65200	65250	65450	65500	52	1
BmNPV	65225	BmNPV	86475	47	1.03944e-28	3.03188e-24	65150	65250	86350	86500	206	1
BmNPV	65225	BmNPV	107225	44	3.34614e-19	5.16579e-15	65150	65250	107050	107250	313	1
BmNPV	65225	BmNPV	107475	57	1.00941e-38	5.32329e-34	65150	65250	107350	107500	338	1
BmNPV	65225	BmNPV	107575	51	1.645e-35	7.47859e-31	65150	65250	107550	107650	157	1
BmNPV	65225	BmNPV	123775	47	1.68159e-27	4.4879e-23	65150	65250	123700	123850	262	1
BmNPV	65225	BmNPV	123925	49	1.39762e-26	3.48985e-22	65150	65250	123900	123950	99	1
BmNPV	65225	BmNPV	124025	53	9.09439e-30	2.86846e-25	65150	65250	124000	124050	117	1
BmNPV	65225	BmNPV	124125	44	6.73323e-23	1.36153e-18	65150	65250	124100	124150	78	1
BmNPV	65225	BmNPV	124225	46	4.06236e-21	7.19873e-17	65150	65250	124200	124300	131	0.75
BmNPV	65375	BmNPV	65475	202	9.71753e-62	1.5624e-56	65350	65400	65450	65500	202	1
BmNPV	65375	BmNPV	86475	24	1.57244e-10	1.27656e-06	65350	65400	86450	86500	24	1
BmNPV	65375	BmNPV	106925	17	2.53064e-06	0.0144309	65350	65400	106900	106950	17	1
BmNPV	65375	BmNPV	107225	28	1.33314e-09	1.00207e-05	65350	65400	107100	107250	72	1
BmNPV	65375	BmNPV	107375	49	1.44697e-20	2.47753e-16	65350	65400	107350	107500	110	1
BmNPV	65375	BmNPV	107575	30	8.13477e-17	1.0661e-12	65350	65400	107550	107600	30	1
BmNPV	65375	BmNPV	123825	34	6.36557e-11	5.31167e-07	65350	65400	123750	123850	59	1
BmNPV	65375	BmNPV	124025	24	1.45354e-08	0.000100438	65350	65400	124000	124050	24	1
BmNPV	65375	BmNPV	124225	27	3.4302e-09	2.48758e-05	65350	65400	124200	124250	27	1
BmNPV	65475	BmNPV	65575	206	3.36735e-58	4.2688e-53	65450	65500	65550	65600	206	1
BmNPV	65575	BmNPV	65875	46	1.37214e-06	0.00814151	65550	65600	65850	65900	46	1
BmNPV	65875	BmNPV	66025	337	1.3693e-131	1.2895e-125	65850	65900	66000	66100	482	1
BmNPV	65975	BmNPV	66075	204	3.39078e-16	4.29025e-12	65950	66000	66050	66100	204	1
BmNPV	66425	BmNPV	66525	115	6.35397e-16	7.82911e-12	66400	66450	66500	66550	115	1
BmNPV	67925	BmNPV	68075	81	4.49479e-10	3.51482e-06	67900	67950	68050	68100	81	1
BmNPV	69575	BmNPV	69675	192	5.79317e-09	4.14197e-05	69550	69600	69650	69700	192	1
BmNPV	69675	BmNPV	69775	113	5.5179e-17	7.33352e-13	69650	69700	69750	69800	113	1
BmNPV	69675	BmNPV	69875	64	1.25197e-10	1.02395e-06	69650	69700	69850	69900	64	1
BmNPV	69775	BmNPV	69875	186	1.62416e-57	1.95037e-52	69750	69800	69850	69900	186	1
BmNPV	69775	BmNPV	70025	58	1.05271e-10	8.66357e-07	69750	69800	70000	70050	58	1
BmNPV	69875	BmNPV	70025	100	1.05355e-17	1.48082e-13	69850	69900	70000	70100	172	1
BmNPV	70025	BmNPV	70125	204	3.86267e-72	1.15741e-66	70000	70050	70100	70150	204	1
BmNPV	70075	BmNPV	70225	134	1.00851e-32	3.82077e-28	70000	70150	70200	70250	293	1
BmNPV	70725	BmNPV	70825	130	5.38055e-11	4.52987e-07	70650	70750	70800	70950	486	1
BmNPV	70825	BmNPV	70925	208	2.57636e-63	4.99515e-58	70800	70850	70900	70950	208	1
BmNPV	70925	BmNPV	71025	188	1.19006e-43	8.1718e-39	70850	70950	71000	71050	318	1
BmNPV	70925	BmNPV	71175	62	4.60343e-14	4.98294e-10	70850	70950	71100	71200	218	1
BmNPV	71025	BmNPV	71125	109	1.00562e-14	1.14492e-10	71000	71050	71100	71200	222	1
BmNPV	71125	BmNPV	71225	276	1.93787e-70	4.56233e-65	71100	71150	71200	71250	276	1
BmNPV	71125	BmNPV	71375	46	2.87002e-06	0.0162677	71100	71150	71350	71400	46	1
BmNPV	71725	BmNPV	71825	171	3.31781e-21	5.89521e-17	71700	71750	71800	71900	260	1
BmNPV	72175	BmNPV	72375	63	2.39905e-09	1.767e-05	72150	72200	72350	72400	63	1
BmNPV	74025	BmNPV	74175	94	3.67553e-12	3.39346e-08	74000	74050	74100	74200	209	1
BmNPV	74975	BmNPV	75175	51	2.31727e-06	0.0133528	74950	75000	75150	75200	51	1
BmNPV	75175	BmNPV	75425	68	3.74345e-17	5.02587e-13	75150	75200	75400	75450	68	1
BmNPV	76125	BmNPV	76225	147	3.78338e-46	3.11753e-41	76100	76150	76200	76250	147	1
BmNPV	76125	BmNPV	76375	105	2.2678e-37	1.12402e-32	76100	76150	76300	76400	199	1
BmNPV	76225	BmNPV	76325	260	1.87398e-92	1.12303e-86	76200	76250	76300	76450	524	1
BmNPV	76325	BmNPV	76425	207	7.50053e-14	7.89839e-10	76300	76350	76400	76450	207	1
BmNPV	76975	BmNPV	77125	84	5.22182e-10	4.0402e-06	76950	77000	77100	77150	84	1
BmNPV	76975	BmNPV	126575	34	4.31006e-19	6.63835e-15	76950	77000	126550	126600	34	1
BmNPV	77125	BmNPV	77225	144	1.0441e-29	3.27749e-25	77100	77150	77200	77250	144	1
BmNPV	77125	BmNPV	126325	41	1.59046e-17	2.2026e-13	77100	77150	126300	126350	41	1
BmNPV	77125	BmNPV	126575	23	2.97351e-11	2.54236e-07	77100	77150	126550	126600	23	1
BmNPV	77225	BmNPV	126325	42	1.10351e-13	1.14738e-09	77200	77250	126300	126350	42	1
BmNPV	77875	BmNPV	77975	223	4.34882e-42	2.89572e-37	77850	77900	77950	78000	223	1
BmNPV	77875	BmNPV	125775	31	2.13454e-09	1.5757e-05	77850	77900	125750	125800	31	1
BmNPV	78125	BmNPV	78225	224	1.0064e-21	1.88473e-17	78100	78150	78200	78250	224	1
BmNPV	78175	BmNPV	78425	66	1.98642e-06	0.0115473	78150	78200	78400	78450	66	1
BmNPV	78325	BmNPV	78425	184	1.44949e-27	3.90004e-23	78300	78350	78400	78450	184	1
BmNPV	78425	BmNPV	78525	112	1.20575e-10	9.87373e-07	78400	78450	78500	78550	112	1
BmNPV	78525	BmNPV	78825	42	2.20533e-08	0.000150028	78500	78550	78800	78850	42	1
BmNPV	78825	BmNPV	78925	145	7.99944e-18	1.13894e-13	78800	78850	78900	79000	240	1
BmNPV	78925	BmNPV	79025	196	1.18704e-15	1.42793e-11	78900	78950	79000	79050	196	1
BmNPV	78975	BmNPV	79125	101	2.50524e-06	0.0143108	78950	79000	79100	79150	101	1
BmNPV	78975	BmNPV	79225	67	1.13686e-18	1.71101e-14	78950	79050	79200	79250	158	1
BmNPV	79125	BmNPV	79225	188	1.20696e-48	1.12061e-43	79100	79150	79200	79250	188	1
BmNPV	79225	BmNPV	79525	39	3.08148e-10	2.43565e-06	79200	79250	79500	79550	39	1
BmNPV	79525	BmNPV	79625	160	1.64775e-16	2.11736e-12	79500	79550	79600	79700	253	1
BmNPV	79625	BmNPV	79725	165	5.37019e-17	7.16612e-13	79600	79650	79700	79750	165	1
BmNPV	80275	BmNPV	80375	225	1.77889e-36	8.43634e-32	80250	80300	80350	80400	225	1
BmNPV	80525	BmNPV	80775	73	7.59201e-19	1.15582e-14	80500	80550	80750	80800	73	1
BmNPV	80775	BmNPV	80875	137	6.46545e-33	2.46362e-28	80750	80800	80850	80900	137	1
BmNPV	80875	BmNPV	80975	149	1.53147e-34	6.64178e-30	80850	80900	80950	81000	149	1
BmNPV	80875	BmNPV	81075	91	1.51194e-08	0.000104255	80850	80900	81050	81100	91	1
BmNPV	80975	BmNPV	81075	217	2.62107e-26	6.39935e-22	80950	81000	81050	81100	217	1
BmNPV	80975	BmNPV	81175	94	1.98483e-19	3.10787e-15	80950	81000	81150	81200	94	1
BmNPV	81075	BmNPV	81175	159	7.82528e-19	1.18859e-14	81050	81100	81150	81200	159	1
BmNPV	81375	BmNPV	81475	180	7.35412e-26	1.73759e-21	81350	81400	81450	81500	180	1
BmNPV	81475	BmNPV	81675	95	1.11863e-16	1.44306e-12	81400	81500	81650	81700	186	1
BmNPV	82225	BmNPV	82625	44	7.88616e-17	1.03558e-12	82200	82250	82600	82650	44	1
BmNPV	82275	BmNPV	82375	126	1.47692e-27	3.95769e-23	82200	82300	82350	82400	228	1
BmNPV	82375	BmNPV	82575	71	4.02376e-10	3.16148e-06	82350	82400	82550	82650	107	1
BmNPV	82525	BmNPV	82625	178	3.10857e-16	3.94833e-12	82500	82550	82600	82650	178	1
BmNPV	82625	BmNPV	82775	138	1.12834e-34	4.992e-30	82550	82650	82750	82800	228	1
BmNPV	82625	BmNPV	82925	43	5.83757e-09	4.16919e-05	82600	82650	82850	82950	99	1
BmNPV	82925	BmNPV	83025	192	3.06145e-63	5.6059e-58	82850	82950	82950	83050	492	0.75
BmNPV	82925	BmNPV	83125	142	6.125e-34	2.53939e-29	82900	83050	83100	83200	577	1
BmNPV	83825	BmNPV	83925	134	4.53247e-11	3.82564e-07	83750	83850	83900	83950	212	1
BmNPV	83925	BmNPV	84025	145	6.31586e-29	1.88391e-24	83900	83950	84000	84050	145	1
BmNPV	83925	BmNPV	84175	43	4.46081e-07	0.00274309	83900	83950	84150	84200	43	1
BmNPV	84025	BmNPV	84175	112	2.55154e-19	3.94833e-15	84000	84050	84150	84200	112	1
BmNPV	84175	BmNPV	84425	62	4.2294e-16	5.2704e-12	84150	84200	84400	84450	62	1
BmNPV	84475	BmNPV	84725	63	6.50418e-10	4.97978e-06	84400	84500	84700	84750	97	1
BmNPV	84725	BmNPV	84825	197	6.95424e-46	5.52322e-41	84700	84750	84800	84850	197	1
BmNPV	84725	BmNPV	84925	67	6.05864e-07	0.003681	84700	84750	84900	84950	67	1
BmNPV	84825	BmNPV	84975	122	3.02697e-14	3.31461e-10	84800	84850	84950	85000	122	1
BmNPV	86275	BmNPV	86375	144	2.139e-21	3.87373e-17	86250	86300	86350	86500	294	1
BmNPV	86375	BmNPV	86475	217	2.01701e-48	1.79679e-43	86350	86400	86450	86500	217	1
BmNPV	86375	BmNPV	89975	29	6.34208e-08	0.00041558	86350	86400	89950	90050	60	1
BmNPV	86375	BmNPV	107025	57	3.38278e-29	1.02763e-24	86350	86500	107000	107250	524	1
BmNPV	86375	BmNPV	124375	35	1.08813e-06	0.00652685	86350	86400	124350	124400	35	1
BmNPV	86425	BmNPV	107575	54	1.41211e-39	7.95616e-35	86350	86500	107550	107650	282	1
BmNPV	86425	BmNPV	124025	42	6.90052e-21	1.20613e-16	86400	86500	124000	124050	80	1
BmNPV	86475	BmNPV	106925	23	1.47556e-09	1.10283e-05	86450	86500	106900	106950	23	1
BmNPV	86475	BmNPV	107475	58	4.3979e-40	2.5885e-35	86350	86500	107350	107500	244	0.666667
BmNPV	86475	BmNPV	123825	52	1.82093e-21	3.33435e-17	86400	86500	123700	123850	168	0.833333
BmNPV	86475	BmNPV	123925	49	7.80965e-27	2.00318e-22	86350	86500	123900	123950	114	1
BmNPV	86475	BmNPV	124125	25	8.67434e-09	6.10916e-05	86400	86500	124100	124150	49	1
BmNPV	86475	BmNPV	124275	59	3.5336e-39	1.94114e-34	86350	86500	124200	124300	233	1
BmNPV	86475	BmNPV	124375	29	3.89006e-07	0.00240558	86450	86500	124350	124400	29	1
BmNPV	86875	BmNPV	87525	33	1.32784e-06	0.00789287	86850	86900	87450	87550	53	1
BmNPV	87625	BmNPV	114375	83	1.1491e-06	0.00686132	87600	87650	114350	114400	83	1
BmNPV	87625	BmNPV	115875	75	3.99877e-07	0.00247049	87600	87650	115850	115900	75	1
BmNPV	88475	BmNPV	88575	200	5.99756e-09	4.26957e-05	88450	88500	88550	88600	200	1
BmNPV	88475	BmNPV	88675	79	8.20567e-12	7.38965e-08	88450	88500	88650	88700	79	1
BmNPV	88675	BmNPV	88775	180	3.4773e-63	6.04276e-58	88650	88700	88750	88800	180	1
BmNPV	88775	BmNPV	88875	148	1.83345e-29	5.62148e-25	88750	88800	88850	88900	148	1
BmNPV	88875	BmNPV	89025	115	4.09441e-15	4.79406e-11	88850	88900	89000	89050	115	1
BmNPV	89025	BmNPV	89125	154	1.55235e-40	9.38822e-36	89000	89050	89100	89150	154	1
BmNPV	89025	BmNPV	89225	84	5.48616e-20	9.01872e-16	89000	89050	89200	89250	84	1
BmNPV	89125	BmNPV	89225	466	7.24088e-287	2.38661e-280	89100	89150	89200	89250	466	1
BmNPV	89125	BmNPV	89375	63	3.37574e-13	3.40782e-09	89100	89150	89300	89400	168	1
BmNPV	89225	BmNPV	89375	150	2.61804e-40	1.5548e-35	89200	89250	89300	89400	287	1
BmNPV	89975	BmNPV	90225	91	1.80158e-27	4.76952e-23	89950	90050	90200	90250	179	1
BmNPV	89975	BmNPV	123925	22	3.47651e-06	0.0195707	89950	90000	123900	123950	22	1
BmNPV	90025	BmNPV	107225	29	5.07415e-06	0.0281558	90000	90050	107200	107250	29	1
BmNPV	90025	BmNPV	124025	32	4.89432e-09	3.51073e-05	90000	90050	124000	124050	32	1
BmNPV	90125	BmNPV	90225	226	6.6089e-71	1.67563e-65	90100	90150	90200	90250	226	1
BmNPV	90125	BmNPV	90325	74	3.5956e-07	0.00223186	90100	90150	90300	90350	74	1
BmNPV	90225	BmNPV	90325	207	8.69229e-71	2.12223e-65	90200	90250	90300	90350	207	1
BmNPV	90225	BmNPV	90425	72	2.40953e-09	1.77076e-05	90200	90250	90400	90450	72	1
BmNPV	90325	BmNPV	90425	152	1.3194e-28	3.81472e-24	90300	90350	90400	90450	152	1
BmNPV	90425	BmNPV	90725	62	6.13038e-19	9.37629e-15	90400	90450	90700	90750	62	1
BmNPV	90775	BmNPV	90875	131	1.72086e-16	2.20701e-12	90700	90800	90850	91000	545	1
BmNPV	90875	BmNPV	90975	182	5.05727e-61	7.57677e-56	90850	90950	90950	91050	512	0.75
BmNPV	90975	BmNPV	91225	74	1.53282e-17	2.12725e-13	90850	91050	91150	91250	340	0.625
BmNPV	91225	BmNPV	91375	162	4.2296e-39	2.30428e-34	91150	91250	91350	91400	223	1
BmNPV	91375	BmNPV	91625	61	6.45084e-12	5.88979e-08	91350	91400	91450	91650	329	1
BmNPV	91525	BmNPV	91625	218	3.39169e-63	6.04276e-58	91450	91550	91550	91650	535	0.75
BmNPV	91875	BmNPV	91975	187	1.28599e-34	5.65154e-30	91850	91900	91950	92000	187	1
BmNPV	91925	BmNPV	92125	59	4.96876e-06	0.0276175	91900	91950	92100	92150	59	1
BmNPV	93025	BmNPV	93125	183	1.8037e-32	6.60561e-28	93000	93050	93100	93200	302	1
BmNPV	93325	BmNPV	93425	202	2.15313e-39	1.19273e-34	93300	93350	93400	93450	202	1
BmNPV	93775	BmNPV	93925	84	5.47116e-08	0.000359942	93750	93800	93900	93950	84	1
BmNPV	94575	BmNPV	94725	100	1.50593e-10	1.22407e-06	94550	94600	94700	94800	155	1
BmNPV	95575	BmNPV	96425	19	5.28561e-06	0.0292798	95550	95600	96400	96450	19	1
BmNPV	96175	BmNPV	96425	60	9.75674e-16	1.18013e-11	96150	96250	96400	96450	124	1
BmNPV	96425	BmNPV	96675	79	1.64294e-19	2.60972e-15	96400	96450	96600	96750	241	1
BmNPV	96625	BmNPV	96725	233	1.00375e-26	2.54492e-22	96600	96650	96700	96750	233	1
BmNPV	96725	BmNPV	96875	124	1.1952e-08	8.31976e-05	96650	96750	96850	96900	194	1
BmNPV	96875	BmNPV	96975	123	1.37537e-14	1.54455e-10	96850	96900	96950	97000	123	1
BmNPV	96975	BmNPV	97225	91	6.36492e-25	1.43201e-20	96950	97000	97200	97250	91	1
BmNPV	97225	BmNPV	97325	113	1.61654e-13	1.67027e-09	97200	97250	97300	97400	199	1
BmNPV	97375	BmNPV	97475	200	1.11986e-53	1.2102e-48	97350	97400	97450	97550	279	1
BmNPV	98175	BmNPV	98275	180	3.78413e-65	7.79537e-60	98100	98250	98200	98350	924	0.666667
BmNPV	98275	BmNPV	98525	53	3.97261e-13	3.97385e-09	98150	98350	98400	98550	547	0.75
BmNPV	98425	BmNPV	98525	164	4.58323e-62	7.55322e-57	98400	98450	98500	98550	164	1
BmNPV	98425	BmNPV	98675	75	9.31822e-14	9.71934e-10	98400	98550	98650	98700	275	1
BmNPV	98675	BmNPV	98775	201	7.48443e-25	1.66121e-20	98650	98700	98750	98800	201	1
BmNPV	98775	BmNPV	98875	137	1.47319e-09	1.10231e-05	98750	98800	98850	98950	233	1
BmNPV	98925	BmNPV	99175	83	1.78407e-27	4.74221e-23	98850	98950	99150	99200	137	1
BmNPV	100475	BmNPV	100575	228	3.0232e-45	2.2907e-40	100450	100500	100550	100600	228	1
BmNPV	100725	BmNPV	101025	53	7.36947e-12	6.67354e-08	100700	100750	101000	101100	98	1
BmNPV	101175	BmNPV	101275	194	2.87356e-33	1.14113e-28	101150	101200	101250	101300	194	1
BmNPV	101275	BmNPV	101575	41	7.55079e-08	0.000493802	101250	101300	101550	101600	41	1
BmNPV	101625	BmNPV	101775	187	8.56329e-21	1.48944e-16	101550	101650	101750	101800	261	1
BmNPV	101775	BmNPV	101875	374	3.41249e-226	5.62382e-220	101700	101800	101850	101900	497	1
BmNPV	101775	BmNPV	102025	56	1.86737e-08	0.000128361	101750	101800	102000	102050	56	1
BmNPV	101875	BmNPV	101975	117	7.7875e-17	1.02466e-12	101850	101900	101950	102050	193	1
BmNPV	102525	BmNPV	102775	88	6.15441e-29	1.8441e-24	102500	102550	102750	102800	88	1
BmNPV	102575	BmNPV	102675	165	2.3449e-07	0.00148063	102550	102600	102650	102700	165	1
BmNPV	102675	BmNPV	102775	149	9.58282e-17	1.25028e-12	102650	102700	102750	102800	149	1
BmNPV	102775	BmNPV	103075	35	6.881e-06	0.0376744	102750	102800	103050	103100	35	1
BmNPV	102975	BmNPV	103075	199	7.00085e-27	1.8098e-22	102950	103000	103050	103100	199	1
BmNPV	103075	BmNPV	119575	40	7.2773e-16	8.88378e-12	103050	103100	119550	119600	40	1
BmNPV	103975	BmNPV	104175	95	1.41104e-12	1.34223e-08	103950	104000	104100	104250	258	1
BmNPV	104125	BmNPV	104225	187	1.59768e-57	1.95037e-52	104100	104150	104200	104250	187	1
BmNPV	104375	BmNPV	104475	128	1.95328e-12	1.83682e-08	104350	104400	104450	104550	215	1
BmNPV	105075	BmNPV	105325	63	8.70021e-06	0.0471647	105050	105100	105300	105350	63	1
BmNPV	105275	BmNPV	105375	270	2.20875e-65	4.69683e-60	105250	105300	105350	105400	270	1
BmNPV	106575	BmNPV	106675	101	1.33972e-07	0.000861614	106500	106600	106650	106700	175	1
BmNPV	106675	BmNPV	106925	60	2.52675e-11	2.18016e-07	106650	106700	106900	106950	60	1
BmNPV	106925	BmNPV	107125	122	1.10823e-26	2.79905e-22	106900	106950	107000	107200	414	1
BmNPV	106925	BmNPV	107375	49	3.92548e-08	0.000261384	106900	106950	107350	107400	49	1
BmNPV	106925	BmNPV	107575	27	3.32867e-11	2.83865e-07	106900	106950	107550	107600	27	1
BmNPV	106925	BmNPV	123925	26	9.68974e-10	7.31676e-06	106900	106950	123900	123950	26	1
BmNPV	106925	BmNPV	124025	21	1.55434e-06	0.00916486	106900	106950	124000	124050	21	1
BmNPV	106925	BmNPV	124225	36	6.93326e-15	8.00428e-11	106900	106950	124200	124300	63	1
BmNPV	107075	BmNPV	107175	232	2.42869e-89	1.23154e-83	107000	107150	107100	107250	923	0.555556
BmNPV	107075	BmNPV	107425	62	1.46279e-19	2.34048e-15	107050	107250	107350	107500	542	0.75
BmNPV	107075	BmNPV	124275	61	1.08945e-41	7.18169e-37	107000	107250	124200	124300	462	1
BmNPV	107125	BmNPV	107575	74	4.37114e-32	1.56602e-27	107000	107250	107550	107650	321	0.8
BmNPV	107125	BmNPV	124025	52	9.28266e-24	1.96758e-19	107100	107250	124000	124050	148	1
BmNPV	107125	BmNPV	124125	48	1.01941e-21	1.90369e-17	107050	107250	124100	124150	159	1
BmNPV	107175	BmNPV	123925	40	6.3099e-20	1.02451e-15	107050	107250	123900	123950	147	1
BmNPV	107225	BmNPV	123775	41	4.03837e-16	5.04189e-12	107050	107250	123700	123850	262	0.75
BmNPV	107375	BmNPV	107475	210	2.91401e-26	7.0883e-22	107350	107400	107450	107500	210	1
BmNPV	107475	BmNPV	107575	182	1.99787e-59	2.74377e-54	107350	107500	107550	107650	624	0.833333
BmNPV	107475	BmNPV	123825	66	2.74548e-32	9.9991e-28	107350	107500	123700	123850	480	1
BmNPV	107475	BmNPV	123925	70	4.84977e-47	4.09872e-42	107350	107500	123900	123950	208	1
BmNPV	107475	BmNPV	124025	62	2.02146e-38	1.03299e-33	107350	107500	124000	124050	192	1
BmNPV	107475	BmNPV	124125	55	5.16553e-33	1.99131e-28	107350	107500	124100	124150	169	1
BmNPV	107475	BmNPV	124225	51	2.63858e-25	6.06051e-21	107350	107500	124200	124300	260	1
BmNPV	107575	BmNPV	123775	42	2.4459e-25	5.63759e-21	107550	107650	123700	123850	194	1
BmNPV	107575	BmNPV	123925	56	3.01856e-36	1.42133e-31	107550	107650	123900	123950	109	1
BmNPV	107575	BmNPV	124025	32	2.04445e-14	2.26127e-10	107550	107650	124000	124050	61	1
BmNPV	107575	BmNPV	124225	54	8.52989e-31	2.86885e-26	107550	107650	124200	124300	183	1
BmNPV	107625	BmNPV	124125	29	3.77525e-13	3.7917e-09	107550	107650	124100	124150	57	1
BmNPV	107625	BmNPV	124375	30	3.11256e-09	2.26971e-05	107600	107650	124350	124400	30	1
BmNPV	107975	BmNPV	108125	68	2.31082e-06	0.0133272	107950	108000	108100	108150	68	1
BmNPV	108725	BmNPV	108825	180	4.35049e-08	0.000289099	108700	108750	108800	108850	180	1
BmNPV	109925	BmNPV	110075	142	4.88505e-33	1.89426e-28	109850	109950	110050	110150	453	1
BmNPV	110375	BmNPV	110575	183	6.74952e-80	2.61725e-74	110300	110400	110550	110600	261	1
BmNPV	110375	BmNPV	110675	40	4.47041e-06	0.0249527	110350	110400	110650	110700	40	1
BmNPV	110575	BmNPV	110675	94	2.11504e-09	1.56305e-05	110550	110600	110650	110700	94	1
BmNPV	110725	BmNPV	111025	45	6.62671e-12	6.042e-08	110700	110750	111000	111050	45	1
BmNPV	110725	BmNPV	111125	30	1.82221e-07	0.00115835	110700	110750	111100	111150	30	1
BmNPV	111025	BmNPV	111125	152	3.02194e-41	1.93406e-36	111000	111050	111100	111150	152	1
BmNPV	111125	BmNPV	111375	78	1.77933e-20	3.01529e-16	111100	111150	111350	111400	78	1
BmNPV	112825	BmNPV	112925	106	1.37388e-08	9.53339e-05	112800	112850	112900	112950	106	1
BmNPV	112975	BmNPV	113075	127	1.94121e-24	4.25136e-20	112900	113000	113050	113100	230	1
BmNPV	113075	BmNPV	113325	61	2.07087e-11	1.79622e-07	113050	113100	113300	113350	61	1
BmNPV	114125	BmNPV	114225	215	7.29196e-39	3.87653e-34	114100	114150	114200	114250	215	1
BmNPV	114125	BmNPV	114325	76	3.60741e-17	4.873e-13	114100	114250	114300	114350	307	1
BmNPV	114325	BmNPV	114525	56	2.05933e-07	0.00130531	114300	114350	114500	114550	56	1
BmNPV	114375	BmNPV	115875	112	3.487e-16	4.39512e-12	114350	114400	115850	115950	211	1
BmNPV	114925	BmNPV	115125	91	5.39147e-20	8.88522e-16	114900	114950	115100	115200	159	1
BmNPV	115125	BmNPV	115275	71	2.16091e-06	0.0125064	115100	115150	115250	115300	71	1
BmNPV	115725	BmNPV	115825	124	5.44589e-11	4.57903e-07	115700	115750	115800	115850	124	1
BmNPV	115825	BmNPV	115925	214	7.36589e-06	0.040229	115800	115850	115900	115950	214	1
BmNPV	116725	BmNPV	116825	244	1.86482e-65	4.09766e-60	116700	116850	116800	116950	860	0.555556
BmNPV	117025	BmNPV	117125	221	1.09849e-48	1.03447e-43	117000	117050	117100	117150	221	1
BmNPV	119225	BmNPV	119525	162	3.30477e-92	1.81543e-86	119200	119250	119450	119550	231	1
BmNPV	119475	BmNPV	119575	195	2.80589e-25	6.42243e-21	119450	119500	119550	119600	195	1
BmNPV	120125	BmNPV	120225	171	1.31629e-22	2.59016e-18	120100	120150	120200	120250	171	1
BmNPV	120225	BmNPV	120475	81	2.71521e-06	0.01543	120200	120250	120450	120500	81	1
BmNPV	120475	BmNPV	120575	136	6.61144e-13	6.53418e-09	120450	120500	120550	120650	227	1
BmNPV	120575	BmNPV	120825	90	6.25358e-14	6.65977e-10	120550	120650	120800	120900	130	0.5
BmNPV	121325	BmNPV	121425	204	1.94183e-38	1.00005e-33	121300	121350	121400	121450	204	1
BmNPV	121625	BmNPV	121725	198	3.42182e-26	8.26259e-22	121600	121650	121700	121750	198	1
BmNPV	121725	BmNPV	121875	145	3.20721e-36	1.49944e-31	121600	121750	121850	121950	514	0.833333
BmNPV	121875	BmNPV	122425	64	1.50598e-23	3.1317e-19	121850	121900	122400	122450	64	1
BmNPV	122075	BmNPV	122375	48	1.89827e-11	1.65522e-07	122050	122100	122350	122400	48	1
BmNPV	122525	BmNPV	122625	348	1.59177e-139	2.09861e-133	122500	122600	122600	122700	658	0.75
BmNPV	122625	BmNPV	122875	77	2.53897e-19	3.93812e-15	122550	122700	122850	122900	192	1
BmNPV	122675	BmNPV	122775	110	7.30561e-22	1.38388e-17	122500	122700	122750	122800	351	1
BmNPV	122775	BmNPV	122875	204	1.27275e-82	5.99289e-77	122750	122800	122850	122900	204	1
BmNPV	122775	BmNPV	122975	137	2.14314e-47	1.85891e-42	122750	122800	122950	123000	137	1
BmNPV	122875	BmNPV	122975	198	1.41283e-61	2.21749e-56	122850	122900	122950	123000	198	1
BmNPV	122875	BmNPV	123075	63	9.19955e-07	0.00553321	122850	122900	123050	123100	63	1
BmNPV	123725	BmNPV	123825	266	3.66053e-50	3.60156e-45	123700	123750	123800	123850	266	1
BmNPV	123725	BmNPV	123925	96	1.14973e-13	1.19355e-09	123700	123800	123900	123950	206	1
BmNPV	123725	BmNPV	124125	41	6.16294e-08	0.000404243	123700	123750	124100	124150	41	1
BmNPV	123775	BmNPV	124025	71	2.75808e-10	2.19053e-06	123700	123800	124000	124050	119	1
BmNPV	123775	BmNPV	124225	46	9.90703e-09	6.91819e-05	123750	123800	124200	124250	46	1
BmNPV	123925	BmNPV	124025	147	3.10851e-14	3.39825e-10	123900	123950	124000	124050	147	1
BmNPV	123925	BmNPV	124225	88	9.57807e-17	1.25028e-12	123900	123950	124200	124300	132	1
BmNPV	124025	BmNPV	124125	122	2.02594e-08	0.000138539	124000	124050	124100	124150	122	1
BmNPV	124125	BmNPV	124225	124	8.82268e-06	0.0477893	124100	124150	124200	124250	124	1
BmNPV	124275	BmNPV	124375	178	4.57718e-14	4.96267e-10	124250	124300	124350	124450	269	1
BmNPV	124975	BmNPV	125125	95	4.67234e-13	4.66672e-09	124950	125000	125100	125200	178	1
BmNPV	125125	BmNPV	125325	62	3.17695e-08	0.000211756	125100	125150	125300	125350	62	1
BmNPV	125775	BmNPV	125875	183	1.18868e-20	2.04591e-16	125750	125800	125850	125900	183	1
BmNPV	125875	BmNPV	126675	60	1.48692e-40	9.07582e-36	125800	125900	126650	126750	115	0.75
BmNPV	126575	BmNPV	126725	107	7.96639e-22	1.49615e-17	126550	126600	126650	126750	187	1
BmNPV	126725	BmNPV	126925	88	3.89548e-14	4.2375e-10	126650	126750	126900	126950	145	1
BmNPV	127075	BmNPV	127175	203	3.87662e-37	1.87904e-32	127050	127100	127150	127200	203	1
BmNPV	127175	BmNPV	127275	119	1.16609e-14	1.31852e-10	127050	127200	127250	127300	322	1
BmNPV	127275	BmNPV	127375	221	3.31652e-45	2.4844e-40	127250	127300	127350	127400	221	1
BmNPV	127275	BmNPV	127475	78	4.28884e-10	3.36574e-06	127250	127300	127450	127500	78	1
BmNPV	127375	BmNPV	127475	133	2.96111e-08	0.000198465	127350	127400	127450	127500	133	1
BmNPV	127475	BmNPV	127575	105	9.02332e-09	6.34816e-05	127450	127500	127550	127600	105	1
BmNPV	127575	BmNPV	127675	190	8.8506e-44	6.14144e-39	127550	127600	127650	127700	190	1
BmNPV	127675	BmNPV	127875	91	6.86311e-10	5.24241e-06	127650	127700	127800	127900	194	1
BmNPV	127825	BmNPV	127925	190	1.28145e-28	3.72132e-24	127750	127850	127850	127950	527	0.75
BmNPV	127825	BmNPV	128025	83	1.05396e-11	9.42707e-08	127750	127950	128000	128100	428	0.625
BmNPV	128025	BmNPV	128175	111	2.35953e-14	2.59669e-10	128000	128100	128150	128250	318	0.75
BmNPV	128175	BmNPV	128275	188	4.94504e-18	7.16439e-14	128150	128200	128250	128300	188	1
